# Supplementary material for: A high-quality genome assembly of the North American Song Sparrow, Melospiza melodia
Source: bioRxiv preprint, doi:10.1101/850990, version 2 (2019-11-23)
Supplement: Supplementary File S19 [file 850990_file21.xlsx]

## Sheet: Final_blast
Query seqid	Subject seqid	% match	alignment length	# of mismatches	gap open	Query start	Query end	Seq start	Seq end	E-value	bit score
Mmel_00012347-RA	sp|Q6DFT4|TUSC5_XENTR	71.429	140	34	3	1	136	40	177	1.11e-51	164
Mmel_00012349-RA	sp|Q90240|CBPD_ANAPL	83.919	1138	114	3	19	1087	252	1389	0	1960
Mmel_00012348-RA	sp|Q5RBL6|GOSR1_PONAB	92.949	156	9	1	3	156	14	169	6.92e-105	302
Mmel_00012358-RA	sp|Q76I76|SSH2_HUMAN	62.402	1407	446	26	16	1356	34	1423	0	1560
Mmel_00012350-RA	sp|Q9D7L8|TMIG1_MOUSE	45.74	223	90	2	30	221	30	252	6.12e-63	199
Mmel_00012352-RA	sp|P31645|SC6A4_HUMAN	77.542	659	118	4	9	667	2	630	0	1058
Mmel_00012351-RA	sp|P87362|BLMH_CHICK	81.347	386	39	3	12	364	70	455	0	645
Mmel_00012357-RA	sp|A0JP43|EFCB5_MOUSE	49.505	505	253	2	536	1039	712	1215	9.63e-156	501
Mmel_00012355-RA	sp|Q9H0G5|NSRP1_HUMAN	51.813	579	225	21	1	546	1	558	7.17e-144	429
Mmel_00010879-RA	sp|Q3UTH8|ARHG9_MOUSE	90.03	331	12	1	1	310	22	352	0	622
Mmel_00010880-RA	sp|Q58DL7|ARHG9_BOVIN	96.19	105	4	0	5	109	398	502	3.68e-64	206
Mmel_00010881-RA	sp|Q8AXB3|VGFR4_DANRE	59.492	906	337	15	3	899	418	1302	0	1006
Mmel_00010884-RA	sp|Q07424|CDX4_MOUSE	56.944	288	91	6	103	363	1	282	9.17e-99	297
Mmel_00010885-RA	sp|Q5VXU3|CHIC1_HUMAN	71.739	92	5	1	2	93	99	169	1.79e-23	92.8
Mmel_00010889-RA	sp|A5D9H7|UBP12_BOVIN	93.201	353	24	0	4	356	17	369	0	697
Mmel_00010886-RA	sp|Q5U317|FIP1_RAT	60.784	204	64	6	73	272	95	286	6.87e-68	228
Mmel_00010888-RA	sp|A1DZY4|RSLBL_DANRE	68.924	251	77	1	1	250	3	253	3.39e-127	363
Mmel_00010887-RA	sp|Q8N448|LNX2_HUMAN	55.111	675	268	11	35	690	30	688	0	697
Mmel_00015219-RA	sp|P21804|FGFR1_CHICK	96.117	103	4	0	1	103	514	616	1.15e-64	211
Mmel_00015076-RA	sp|Q6PK81|ZN773_HUMAN	45.69	116	53	2	2	107	187	302	3.65e-24	100
Mmel_00010720-RA	sp|Q5F3X0|LCLT1_CHICK	92.857	70	5	0	8	77	56	125	8.25e-42	142
Mmel_00010722-RA	sp|Q5RD13|LBH_PONAB	81.373	102	16	1	5	106	7	105	2.22e-54	167
Mmel_00010723-RA	sp|Q5RDU7|YPEL5_PONAB	100	121	0	0	1	121	1	121	1.75e-87	252
Mmel_00010725-RA	sp|Q8BH83|ANKR9_MOUSE	41.137	299	148	5	14	284	27	325	7.59e-66	212
Mmel_00010730-RA	sp|Q6PAC4|CB071_MOUSE	36.515	964	526	29	1	931	1	911	1.35e-134	442
Mmel_00010728-RA	sp|Q9UM73|ALK_HUMAN	82.558	946	161	2	46	989	677	1620	0	1477
Mmel_00010726-RA	sp|Q9UM73|ALK_HUMAN	57.391	115	49	0	1	115	435	549	3.55e-41	149
Mmel_00010727-RA	sp|Q9UM73|ALK_HUMAN	68.182	88	28	0	11	98	550	637	1.6e-33	129
Mmel_00010729-RA	sp|Q8N3C7|CLIP4_HUMAN	76.238	707	160	6	35	735	1	705	0	1101
Mmel_00014298-RA	sp|P28693|EPHB2_CHICK	97.976	247	5	0	1	247	25	271	8.28e-178	518
Mmel_00014119-RA	sp|Q69Z23|DYH17_MOUSE	60.615	975	245	8	1211	2114	2295	3201	0	1140
Mmel_00014120-RA	sp|Q69Z23|DYH17_MOUSE	32.922	486	249	11	27	511	177	586	4.95e-67	239
Mmel_00015148-RA	sp|Q4V8F5|TADA3_RAT	92.118	203	16	0	6	208	153	355	1.2e-133	384
Mmel_00007816-RA	sp|Q91365|CE162_COTCO	70.525	1218	324	8	170	1381	40	1228	0	1657
Mmel_00007818-RA	sp|O95935|TBX18_HUMAN	88.641	449	19	1	1	417	159	607	0	823
Mmel_00007819-RA	sp|Q68UT7|HUNK_PANTR	62.583	302	111	2	62	362	37	337	8.89e-133	398
Mmel_00007821-RA	sp|Q05927|5NTD_BOVIN	66.022	465	154	3	2	463	110	573	0	616
Mmel_00007823-RA	sp|Q5R903|SNX14_PONAB	83.546	863	99	5	31	866	48	894	0	1452
Mmel_00007825-RA	sp|O60506|HNRPQ_HUMAN	98.229	621	11	0	5	625	1	621	0	1267
Mmel_00007826-RA	sp|Q6VB83|5HT1E_CAVPO	87.671	365	44	1	1	364	1	365	0	663
Mmel_00007829-RA	sp|O60281|ZN292_HUMAN	68.731	2696	790	36	13	2684	57	2723	0	3613
Mmel_00007827-RA	sp|P68241|GLHA_MELGA	96.396	111	2	1	98	208	1	109	3.63e-73	219
Mmel_00007831-RA	sp|Q5REX0|SMIM8_PONAB	75.789	95	19	2	2	92	3	97	1.79e-46	146
Mmel_00007830-RA	sp|Q6PEY0|CXB7_HUMAN	71.233	219	63	0	37	255	1	219	3.68e-115	333
Mmel_00007832-RA	sp|Q6PE87|CF206_MOUSE	60.862	603	235	1	7	608	7	609	0	767
Mmel_00007835-RA	sp|Q9JK30|ORC3_MOUSE	50.688	436	133	8	112	482	297	715	3.83e-126	386
Mmel_00007833-RA	sp|P78382|S35A1_HUMAN	85.274	292	43	0	16	307	5	296	0	511
Mmel_00007836-RA	sp|Q53H80|AKIR2_HUMAN	94.262	122	7	0	40	161	79	200	7.83e-71	215
Mmel_00007834-RA	sp|Q0P5H7|SYRM_BOVIN	65.744	578	134	6	85	610	13	578	0	744
Mmel_00007837-RA	sp|P56971|CNR1_TAEGU	99.366	473	3	0	23	495	1	473	0	979
Mmel_00007839-RA	sp|Q12796|PNRC1_HUMAN	75.177	141	34	1	1	140	186	326	1.49e-67	210
Mmel_00007840-RA	sp|Q8IYS1|P20D2_HUMAN	82.079	279	49	1	14	292	159	436	1.11e-169	480
Mmel_00007838-RA	sp|O55236|MCE1_MOUSE	85.56	277	37	2	1	277	30	303	8.27e-168	480
Mmel_00007843-RA	sp|Q9ULC3|RAB23_HUMAN	83.654	104	17	0	19	122	134	237	1.07e-59	186
Mmel_00007842-RA	sp|P35288|RAB23_MOUSE	89.888	89	9	0	1	89	1	89	7.6e-53	167
Mmel_00007841-RA	sp|P50572|GBRR1_RAT	92.788	416	28	1	3	416	60	475	0	796
Mmel_00007844-RA	sp|O95816|BAG2_HUMAN	80.625	160	31	0	3	162	38	197	2.85e-92	270
Mmel_00007845-RA	sp|Q9Y4E5|ZN451_HUMAN	56.233	1083	437	15	1	1075	8	1061	0	1222
Mmel_00007846-RA	sp|Q5SZJ8|BEND6_HUMAN	71.942	278	71	2	75	348	1	275	1.47e-132	386
Mmel_00007849-RA	sp|Q03001|DYST_HUMAN	78.289	304	58	2	1	296	474	777	1.03e-150	470
Mmel_00007852-RA	sp|Q03001|DYST_HUMAN	87.318	1719	216	1	411	2127	5359	7077	0	3043
Mmel_00007850-RA	sp|Q03001|DYST_HUMAN	86.043	609	85	0	2	610	819	1427	0	1123
Mmel_00007851-RA	sp|Q03001|DYST_HUMAN	43.648	1716	824	26	1938	3557	3548	5216	0	1160
Mmel_00007854-RA	sp|Q96P44|COLA1_HUMAN	48.742	318	72	4	1	227	640	957	1.6e-50	179
Mmel_00007853-RA	sp|Q96P44|COLA1_HUMAN	81.796	401	71	1	1	399	31	431	0	685
Mmel_00007856-RA	sp|P22003|BMP5_HUMAN	98.485	66	1	0	25	90	343	408	3.75e-42	145
Mmel_00007855-RA	sp|P22003|BMP5_HUMAN	94.69	113	6	0	1	113	165	277	3.07e-73	227
Mmel_00007857-RA	sp|Q8TB92|HMGC2_HUMAN	71.515	165	27	1	21	185	67	211	1.4e-77	239
Mmel_00007858-RA	sp|Q6UXV0|GFRAL_HUMAN	47.809	251	118	4	233	482	106	344	7.63e-74	241
Mmel_00007859-RA	sp|P58308|OX2R_MOUSE	83.59	390	55	3	103	492	71	451	0	672
Mmel_00007860-RA	sp|Q5T0W9|FA83B_HUMAN	62.88	889	294	13	1	880	149	1010	0	1029
Mmel_00007866-RA	sp|Q63187|ELOA1_RAT	41.646	401	179	11	144	515	393	767	6.88e-76	258
Mmel_00007864-RA	sp|Q9BTT6|LRRC1_HUMAN	85.625	160	23	0	2	161	365	524	1.75e-85	263
Mmel_00007865-RA	sp|Q9BTT6|LRRC1_HUMAN	59.669	181	42	4	133	287	91	266	7.73e-52	181
Mmel_00007867-RA	sp|Q9H511|KLH31_HUMAN	77.083	624	89	2	1	570	1	624	0	988
Mmel_00007868-RA	sp|P48506|GSH1_HUMAN	82.939	592	56	4	1	557	54	635	0	1008
Mmel_00007870-RA	sp|Q9NP62|GCM1_HUMAN	46.014	439	181	8	16	402	1	435	4.22e-113	340
Mmel_00007875-RA	sp|P26697|GSTA3_CHICK	69.231	221	68	0	1	221	1	221	1.89e-111	321
Mmel_00007873-RA	sp|Q9UPZ9|ICK_HUMAN	79	500	95	5	1	492	1	498	0	771
Mmel_00007869-RA	sp|Q32NI8|ELOV5_XENLA	76.875	320	49	2	1	320	1	295	0	512
Mmel_00007874-RA	sp|P26697|GSTA3_CHICK	84.889	225	34	0	22	246	1	225	1.47e-141	398
Mmel_00007872-RA	sp|Q9UK97|FBX9_HUMAN	81.279	438	78	2	15	449	11	447	0	747
Mmel_00014479-RA	sp|Q5SYB0|FRPD1_HUMAN	91.549	71	6	0	1	71	262	332	3.74e-39	139
Mmel_00014743-RA	sp|P98160|PGBM_HUMAN	55.937	320	129	5	2	315	2338	2651	2.2e-101	330
Mmel_00014080-RA	sp|P49892|AA1R_CHICK	90.865	208	18	1	1	208	118	324	9.61e-121	348
Mmel_00014081-RA	sp|Q05623|MYBPH_CHICK	82.168	286	49	1	3	288	254	537	7.35e-180	509
Mmel_00008265-RA	sp|Q90660|BIR_CHICK	84.477	612	93	2	35	645	1	611	0	1041
Mmel_00008268-RA	sp|Q5I0R4|CK070_XENTR	66.667	231	76	1	25	254	37	267	5.74e-114	330
Mmel_00008267-RA	sp|P46936|YAP1_CHICK	92.405	237	2	1	3	239	228	448	7.35e-151	430
Mmel_00008270-RA	sp|Q86XS5|ANGL5_HUMAN	52.247	356	107	3	17	310	33	387	1.48e-128	374
Mmel_00008271-RA	sp|Q9MYW0|TRPC6_BOVIN	91.176	748	63	2	13	757	56	803	0	1421
Mmel_00008272-RA	sp|Q9Y210|TRPC6_HUMAN	82.143	56	10	0	5	60	828	883	8.18e-25	99
Mmel_00008273-RA	sp|P07812|PRGR_CHICK	97.396	384	9	1	2	385	404	786	0	781
Mmel_00008275-RA	sp|A6NI28|RHG42_HUMAN	91.867	750	61	0	120	869	125	874	0	1395
Mmel_00008276-RA	sp|Q90W79|CNTN5_CHICK	79.167	72	15	0	11	82	48	119	5.38e-33	122
Mmel_00008278-RA	sp|Q66H73|CCD82_RAT	47.153	439	198	9	40	470	102	514	2.34e-112	344
Mmel_00008279-RA	sp|Q8IZL2|MAML2_HUMAN	67.787	357	109	6	1	353	233	587	9.92e-143	445
Mmel_00008280-RA	sp|A5D7F6|MAML2_BOVIN	71.223	139	37	3	4	140	715	852	2.13e-48	172
Mmel_00008282-RA	sp|Q13614|MTMR2_HUMAN	96.22	582	22	0	25	606	62	643	0	1186
Mmel_00008285-RA	sp|Q5HYJ3|FA76B_HUMAN	89.251	307	6	2	1	306	52	332	0	543
Mmel_00008284-RA	sp|B4F7A7|CEP57_RAT	58.947	475	183	6	31	500	32	499	2.06e-175	505
Mmel_00008288-RA	sp|Q9JHS9|CWC15_MOUSE	95.652	230	9	1	1	230	1	229	2.79e-131	372
Mmel_00008286-RA	sp|P58005|SESN3_HUMAN	90.773	466	33	2	1	456	27	492	0	890
Mmel_00008287-RA	sp|Q8C522|ENDD1_MOUSE	37.302	378	215	5	1	357	111	487	1.9e-82	262
Mmel_00008290-RA	sp|E1BEQ5|AMOL1_BOVIN	79.096	531	104	4	32	555	430	960	0	811
Mmel_00013609-RA	sp|Q0VC81|AA3R_BOVIN	59.062	320	119	5	1	311	1	317	2.06e-133	384
Mmel_00013607-RA	sp|Q9NTI7|INKA2_HUMAN	46.957	115	44	3	79	191	198	297	1.03e-21	92.8
Mmel_00013612-RA	sp|Q5E9I7|MEP50_BOVIN	66.111	180	61	0	4	183	149	328	9.99e-87	262
Mmel_00013611-RA	sp|P24539|AT5F1_HUMAN	50	220	67	1	3	222	76	252	5.88e-66	207
Mmel_00013608-RA	sp|P62836|RAP1A_RAT	99.457	184	1	0	1	184	1	184	1.08e-134	377
Mmel_00014783-RA	sp|Q2T9L4|CO059_HUMAN	47.742	155	50	6	1	127	142	293	2.99e-28	107
Mmel_00014745-RA	sp|Q9BXJ1|C1QT1_HUMAN	59.839	249	60	3	28	236	33	281	3.25e-99	293
Mmel_00014776-RA	sp|P18910|ANPRA_RAT	67.133	286	39	3	1	248	705	973	1.26e-115	358
Mmel_00014635-RA	sp|P56696|KCNQ4_HUMAN	65.816	196	44	3	1	178	505	695	6.09e-77	245
Mmel_00012149-RA	sp|Q13797|ITA9_HUMAN	85.714	77	11	0	1	77	63	139	2.72e-42	148
Mmel_00012150-RA	sp|B8JK39|ITA9_MOUSE	69.885	435	73	2	1	389	142	564	0	632
Mmel_00012148-RA	sp|Q5U4E6|GOGA4_RAT	51.29	2248	956	21	1	2165	59	2250	0	1885
Mmel_00014680-RA	sp|O00154|BACH_HUMAN	83.688	282	46	0	1	282	98	379	1.16e-178	500
Mmel_00008496-RA	sp|P97292|HRH2_MOUSE	60.057	348	118	8	5	344	17	351	2.24e-135	394
Mmel_00008499-RA	sp|P10184|IOV7_CHICK	69.71	449	134	2	1	447	24	472	0	664
Mmel_00008502-RA	sp|P05560|IOVO_DRONO	37.879	198	105	9	17	202	16	207	6.52e-34	122
Mmel_00008500-RA	sp|P05560|IOVO_DRONO	74.479	192	49	0	1	192	1	192	3.08e-97	283
Mmel_00008498-RA	sp|Q9NQ38|ISK5_HUMAN	30.518	367	186	12	42	350	704	1059	3.74e-32	131
Mmel_00008505-RA	sp|Q96MT1|RN145_HUMAN	89.91	664	59	3	28	684	1	663	0	1172
Mmel_00008504-RA	sp|Q5ZJJ8|UBCP1_CHICK	99.686	318	1	0	1	318	1	318	0	649
Mmel_00008506-RA	sp|Q63398|COE1_RAT	97.674	43	1	0	3	45	297	339	5.18e-22	95.1
Mmel_00008507-RA	sp|Q63398|COE1_RAT	82.609	184	3	1	39	193	391	574	3.17e-94	289
Mmel_00008509-RA	sp|A7Z035|EPN4_BOVIN	80.218	642	109	11	68	700	11	643	0	942
Mmel_00008511-RA	sp|Q05B50|THG1_BOVIN	81.624	234	43	0	11	244	65	298	1.51e-149	421
Mmel_00008512-RA	sp|Q8WNV5|SOX30_MACFA	53.277	473	197	12	1	452	284	753	3.63e-138	417
Mmel_00008513-RA	sp|Q9H013|ADA19_HUMAN	59.189	838	311	11	3	816	91	921	0	917
Mmel_00008516-RA	sp|Q8TBE3|FNDC9_HUMAN	47.577	227	106	6	1	218	1	223	2.19e-62	196
Mmel_00008515-RA	sp|Q5SQX6|CYFP2_MOUSE	97.606	1253	4	2	1	1227	1	1253	0	2540
Mmel_00008514-RA	sp|Q0D2K0|NIPA4_HUMAN	63.59	390	127	5	1	380	76	460	5.52e-166	475
Mmel_00008519-RA	sp|Q2F7Z4|MED7_PIG	88.261	230	27	0	1	230	1	230	5.26e-155	432
Mmel_00008520-RA	sp|Q5QNS5|HAVR1_MOUSE	36.68	259	127	6	105	328	11	267	2.03e-34	134
Mmel_00008517-RA	sp|Q08881|ITK_HUMAN	75	364	91	0	3	366	47	410	0	580
Mmel_00008522-RA	sp|P0C2C0|RM22_RAT	76.19	126	30	0	1	126	81	206	3.9e-69	209
Mmel_00008523-RA	sp|Q8TEQ6|GEMI5_HUMAN	56.077	1407	474	24	5	1276	109	1506	0	1441
Mmel_00008526-RA	sp|Q96IV6|FXDC2_HUMAN	59.76	333	132	1	52	382	1	333	5.7e-150	429
Mmel_00008524-RA	sp|Q9UFF9|CNOT8_HUMAN	97.838	185	4	0	1	185	107	291	1.85e-132	375
Mmel_00008525-RA	sp|Q6ZQ58|LARP1_MOUSE	95.305	213	10	0	8	220	792	1004	3.31e-145	437
Mmel_00008527-RA	sp|Q6PKG0|LARP1_HUMAN	74.118	85	21	1	1	85	206	289	2.37e-32	120
Mmel_00008530-RA	sp|Q86SR1|GLT10_HUMAN	87.198	414	32	1	7	399	190	603	0	758
Mmel_00008533-RA	sp|Q9NRY5|F1142_HUMAN	69.978	463	123	5	41	501	42	490	0	614
Mmel_00008532-RA	sp|Q5R9E4|MFAP3_PONAB	72.016	243	67	1	49	291	101	342	2.46e-122	357
Mmel_00008535-RA	sp|D3YY23|LONF1_MOUSE	43.208	530	229	10	17	484	235	754	4.35e-134	409
Mmel_00008537-RA	sp|P23818|GRIA1_MOUSE	86.364	308	36	1	1	302	300	607	0	558
Mmel_00008538-RA	sp|Q9ESQ4|NMUR2_RAT	62.903	186	68	1	49	234	204	388	6.93e-75	234
Mmel_00008539-RA	sp|P57695|GLRA1_BOVIN	79.858	422	18	5	1	355	36	457	0	666
Mmel_00008543-RA	sp|Q9NYQ8|FAT2_HUMAN	62.189	4377	1584	24	9	4346	5	4349	0	5498
Mmel_00008542-RA	sp|O93390|SPRC_COTJA	90.417	240	4	1	1	221	1	240	1.96e-158	442
Mmel_00008545-RA	sp|Q6DCE8|CTR2_XENLA	51.149	348	121	3	2	303	190	534	4.85e-108	332
Mmel_00008541-RA	sp|Q9XT28|ATOX1_SHEEP	80.882	68	13	0	13	80	1	68	3.25e-34	114
Mmel_00008544-RA	sp|Q7Z2H8|S36A1_HUMAN	58.9	309	76	3	76	333	168	476	1.95e-111	335
Mmel_00008540-RA	sp|Q32LC7|G3BP1_BOVIN	86.452	465	61	2	5	468	1	464	0	696
Mmel_00014730-RA	sp|O60299|LZTS3_HUMAN	53.365	639	202	16	1	589	1	593	1.1e-177	521
Mmel_00014640-RA	sp|Q7T199|KCA10_CHICK	95.775	355	15	0	1	355	1	355	0	683
Mmel_00012543-RA	sp|Q96JN0|LCOR_HUMAN	93.995	433	26	0	62	494	1	433	0	827
Mmel_00012553-RA	sp|Q9BTU6|P4K2A_HUMAN	95.562	338	15	0	18	355	142	479	0	676
Mmel_00012549-RA	sp|Q5ZLN1|PGAM1_CHICK	96.618	207	7	0	1	207	48	254	3.62e-151	422
Mmel_00012546-RA	sp|Q5F3G0|RHG19_CHICK	96.753	462	15	0	3	464	16	477	0	914
Mmel_00012545-RA	sp|O88279|SLIT1_RAT	83.411	856	104	7	3	825	139	989	0	1398
Mmel_00012552-RA	sp|Q0P5I5|HOGA1_BOVIN	53.448	290	80	3	18	262	14	293	5.49e-99	296
Mmel_00012551-RA	sp|E1BP36|MMS19_BOVIN	70.189	1003	245	5	2	988	65	1029	0	1339
Mmel_00012550-RA	sp|Q9DAA6|EXOS1_MOUSE	90.984	122	11	0	2	123	74	195	5.6e-80	236
Mmel_00012547-RA	sp|Q5ZKD5|RRP12_CHICK	68.692	214	14	1	1	161	652	865	1.77e-87	285
Mmel_00012548-RA	sp|Q5ZKD5|RRP12_CHICK	89.402	368	35	2	35	401	42	406	0	672
Mmel_00013498-RA	sp|Q3T075|STX8_BOVIN	88.406	69	8	0	1	69	112	180	2.27e-27	102
Mmel_00013641-RA	sp|O94759|TRPM2_HUMAN	65.657	198	44	3	40	233	141	318	2.37e-74	249
Mmel_00013640-RA	sp|Q6P3Z3|THAP4_MOUSE	64	125	19	2	2	100	406	530	3.69e-46	158
Mmel_00013638-RA	sp|Q8WY91|THAP4_HUMAN	62.953	386	133	6	1	380	29	410	9.48e-150	438
Mmel_00013634-RA	sp|Q8CIM3|D2HDH_MOUSE	69.191	383	106	3	1	373	14	394	0	535
Mmel_00013635-RA	sp|Q9D8Y8|ING5_MOUSE	87.446	231	29	0	19	249	10	240	2.93e-145	408
Mmel_00013637-RA	sp|Q6PZ02|ATG4B_CHICK	92.903	155	10	1	10	163	35	189	1.59e-103	306
Mmel_00013636-RA	sp|Q6PZ02|ATG4B_CHICK	91.803	61	5	0	15	75	333	393	4.07e-31	114
Mmel_00013820-RA	sp|Q9NR48|ASH1L_HUMAN	58.242	910	304	17	1	904	1	840	0	918
Mmel_00013818-RA	sp|Q9NR48|ASH1L_HUMAN	68.764	445	103	5	421	832	2499	2940	0	588
Mmel_00014795-RA	sp|P36896|ACV1B_HUMAN	56.716	268	38	3	1	190	195	462	5.42e-93	283
Mmel_00014696-RA	sp|Q9R1T9|KCNH4_RAT	56.296	135	58	1	1	134	61	195	1.97e-45	160
Mmel_00013768-RA	sp|Q95L73|CY24A_BISBI	76.027	146	28	2	1	139	44	189	7e-62	191
Mmel_00013770-RA	sp|Q5XI33|CIDEC_RAT	59.606	203	74	4	1	195	27	229	2.82e-78	237
Mmel_00013769-RA	sp|Q0P678|ZCH18_MOUSE	72.198	464	99	7	3	440	489	948	1.12e-101	327
Mmel_00013767-RA	sp|Q5F3B2|RN166_CHICK	99.459	185	1	0	1	185	60	244	5.68e-135	380
Mmel_00014458-RA	sp|P10619|PPGB_HUMAN	63.384	396	108	4	1	394	120	480	6.35e-179	509
Mmel_00014457-RA	sp|Q8VHK0|ACOT8_RAT	74.274	241	61	1	43	282	80	320	1.91e-129	373
Mmel_00015206-RA	sp|Q3TYE7|TM136_MOUSE	62.048	166	63	0	1	166	68	233	9.83e-67	206
Mmel_00014836-RA	sp|O57579|AMPN_CHICK	75.177	141	35	0	5	145	604	744	9.43e-69	226
Mmel_00014177-RA	sp|P80318|TCPG_MOUSE	85.019	534	59	1	1	513	12	545	0	942
Mmel_00010515-RA	sp|O15105|SMAD7_HUMAN	95.506	178	8	0	3	180	249	426	2.77e-125	362
Mmel_00010516-RA	sp|Q5ZLW3|DYM_CHICK	93.277	238	15	1	1	237	249	486	1.83e-150	437
Mmel_00010518-RA	sp|Q28I13|CR032_XENTR	49.495	99	32	1	1	99	1	81	2.53e-26	95.9
Mmel_00010519-RA	sp|P24049|RL17_RAT	100	184	0	0	1	184	1	184	1.45e-137	384
Mmel_00010517-RA	sp|Q5ZLW3|DYM_CHICK	95.031	161	7	1	29	189	47	206	1.56e-102	311
Mmel_00010520-RA	sp|Q9Y5X9|LIPE_HUMAN	74.251	334	73	2	90	411	158	490	0	526
Mmel_00010525-RA	sp|Q96M91|CFA53_HUMAN	31.797	434	287	4	9	438	64	492	1.35e-31	130
Mmel_00010523-RA	sp|Q9ULV0|MYO5B_HUMAN	72	125	34	1	24	147	516	640	1.71e-57	196
Mmel_00010522-RA	sp|Q9ULV0|MYO5B_HUMAN	68.488	1263	295	13	2	1258	683	1848	0	1657
Mmel_00010521-RA	sp|Q3T0R7|THIM_BOVIN	80.612	392	76	0	29	420	6	397	0	669
Mmel_00010524-RA	sp|Q9ULV0|MYO5B_HUMAN	82.818	291	38	1	1	279	177	467	8.3e-171	520
Mmel_00010986-RA	sp|Q80UF9|OTOP3_MOUSE	52.87	575	202	4	30	578	46	577	0	607
Mmel_00010985-RA	sp|Q80SX5|OTOP2_MOUSE	53.797	158	68	3	1	158	411	563	3.41e-50	171
Mmel_00010983-RA	sp|Q80SX5|OTOP2_MOUSE	63.043	92	32	1	42	133	16	105	8.23e-27	107
Mmel_00010982-RA	sp|Q80T11|USH1G_MOUSE	76.695	472	96	6	1	469	1	461	0	705
Mmel_00010987-RA	sp|Q8R1F6|HID1_MOUSE	82.732	776	69	5	2	721	22	788	0	1316
Mmel_00010984-RA	sp|Q80SX5|OTOP2_MOUSE	59.414	239	92	3	283	518	155	391	2.37e-75	251
Mmel_00010993-RA	sp|G5E8K6|MOT6_MOUSE	53.333	480	199	8	16	490	9	468	2.73e-176	506
Mmel_00010989-RA	sp|D2HD32|ICT1_AILME	62.5	88	33	0	1	88	119	206	2.44e-31	111
Mmel_00010988-RA	sp|Q86X02|CDR2L_HUMAN	76.035	459	108	1	1	457	7	465	0	675
Mmel_00010992-RA	sp|Q14681|KCTD2_HUMAN	91.667	156	4	1	4	150	99	254	3.61e-100	291
Mmel_00010995-RA	sp|Q3UJZ3|ARMC7_MOUSE	70.33	182	52	1	2	181	10	191	1.37e-92	271
Mmel_00010998-RA	sp|P61959|SUMO2_RAT	100	88	0	0	6	93	8	95	1.01e-61	185
Mmel_00010990-RA	sp|O75947|ATP5H_HUMAN	69.421	121	37	0	9	129	41	161	6.17e-60	184
Mmel_00010996-RA	sp|Q9JM14|NT5C_MOUSE	73.958	192	50	0	7	198	6	197	1.11e-104	302
Mmel_00010997-RA	sp|Q3T0T5|JUPI1_BOVIN	70.064	157	43	2	1	156	1	154	1.58e-55	174
Mmel_00011001-RA	sp|Q5ZMU0|RT07_CHICK	87.204	211	27	0	4	214	23	233	5.37e-132	373
Mmel_00010999-RA	sp|Q3ZC98|NUP85_BOVIN	74.35	577	105	2	1	534	80	656	0	881
Mmel_00011000-RA	sp|Q9NZ52|GGA3_HUMAN	60.857	350	105	7	409	750	398	723	5.62e-113	361
Mmel_00011002-RA	sp|Q3ZC21|MI4GD_BOVIN	68.613	274	34	1	1	274	1	222	1.56e-123	354
Mmel_00011003-RA	sp|Q5IS35|TPC_MACFA	63.356	292	101	1	7	292	29	320	6.52e-136	390
Mmel_00011004-RA	sp|P62994|GRB2_RAT	94.845	194	10	0	24	217	24	217	4.22e-139	390
Mmel_00011007-RA	sp|Q8JZL2|MCHR1_MOUSE	57.202	243	96	2	1	237	8	248	1.31e-95	288
Mmel_00011005-RA	sp|Q12767|TMM94_HUMAN	80.769	1352	219	5	2	1318	10	1355	0	2147
Mmel_00011009-RA	sp|Q6P1M3|L2GL2_HUMAN	78.682	1032	204	7	1	1029	1	1019	0	1631
Mmel_00011008-RA	sp|Q8C2A2|SEN54_MOUSE	51.967	483	219	6	3	476	47	525	3.68e-162	471
Mmel_00011011-RA	sp|Q96JP2|MY15B_HUMAN	47.325	486	216	10	3	484	424	873	6.94e-113	371
Mmel_00011014-RA	sp|Q9UHR5|S30BP_HUMAN	93.119	218	11	1	16	229	91	308	1.38e-132	378
Mmel_00011012-RA	sp|O94762|RECQ5_HUMAN	43.838	641	282	17	15	642	411	986	6.07e-126	399
Mmel_00013057-RA	sp|Q9BV36|MELPH_HUMAN	39.873	474	214	14	4	450	111	540	2.18e-64	226
Mmel_00013055-RA	sp|P15989|CO6A3_CHICK	85.615	2148	267	3	1	2146	1	2108	0	3679
Mmel_00011788-RA	sp|Q9DCN1|NUD12_MOUSE	72.786	463	125	1	1	463	1	462	0	730
Mmel_00013743-RA	sp|Q9D915|TCIM_MOUSE	76.415	106	25	0	1	106	1	106	9.01e-55	168
Mmel_00013744-RA	sp|Q8R0V5|I23O2_MOUSE	60.87	92	36	0	1	92	149	240	1.28e-31	117
Mmel_00013745-RA	sp|Q13443|ADAM9_HUMAN	64.163	759	202	11	7	708	33	778	0	968
Mmel_00013504-RA	sp|A8MY62|BLML_HUMAN	65.657	495	150	3	7	501	24	498	0	648
Mmel_00013505-RA	sp|B1AJZ9|FHAD1_HUMAN	36.017	236	139	5	344	572	853	1083	3.51e-24	111
Mmel_00014648-RA	sp|P02606|MLEC_CHICK	95.556	135	6	0	1	135	53	187	2.85e-93	270
Mmel_00008291-RA	sp|P20237|GBRA4_BOVIN	73.16	462	88	3	15	475	91	517	0	676
Mmel_00008293-RA	sp|P08220|GBRB1_BOVIN	79.322	295	53	3	15	304	183	474	9.34e-167	474
Mmel_00008295-RA	sp|Q9P241|AT10D_HUMAN	61.362	1131	319	13	1	1020	1	1124	0	1347
Mmel_00008292-RA	sp|P18505|GBRB1_HUMAN	97.297	74	2	0	19	92	81	154	6.42e-46	156
Mmel_00008294-RA	sp|Q9NX08|COMD8_HUMAN	66.86	172	56	1	44	214	12	183	6.81e-78	234
Mmel_00008297-RA	sp|Q9Y5Q5|CORIN_HUMAN	72.806	695	142	6	1	651	149	840	0	1040
Mmel_00008296-RA	sp|Q9Y5Q5|CORIN_HUMAN	89.109	101	11	0	4	104	942	1042	2.16e-57	192
Mmel_00008299-RA	sp|Q90980|CNG3_CHICK	89.506	648	62	3	1	645	1	645	0	1126
Mmel_00008298-RA	sp|Q6ZNB6|NFXL1_HUMAN	75.589	467	112	2	328	793	444	909	0	681
Mmel_00008300-RA	sp|Q8BMW7|NIPA3_MOUSE	68.627	357	92	2	6	343	52	407	6.52e-159	454
Mmel_00008301-RA	sp|P42680|TEC_HUMAN	81.959	582	102	2	55	635	45	624	0	1003
Mmel_00008302-RA	sp|Q3MHV6|SLAI2_BOVIN	83.834	433	67	1	11	440	129	561	0	711
Mmel_00008303-RA	sp|Q3UEZ8|NTCP4_MOUSE	73.856	153	37	2	1	152	287	437	1.07e-73	229
Mmel_00008304-RA	sp|O94915|FRYL_HUMAN	91.037	2979	255	6	7	2979	41	3013	0	5355
Mmel_00008307-RA	sp|Q9H720|PG2IP_HUMAN	68.035	682	217	1	4	684	17	698	0	952
Mmel_00008305-RA	sp|Q28GQ3|OCAD1_XENTR	46.753	231	104	5	38	259	34	254	9.38e-60	192
Mmel_00008312-RA	sp|E1BW58|MIEAP_CHICK	54.018	224	97	2	129	347	227	449	1.46e-78	254
Mmel_00008309-RA	sp|Q92564|DCNL4_HUMAN	90.406	271	15	2	1	271	33	292	0	510
Mmel_00008310-RA	sp|Q68CR7|LRC66_HUMAN	35.318	487	243	10	1	435	1	467	6.65e-72	261
Mmel_00008311-RA	sp|Q5R9U1|SGCB_PONAB	92.079	303	24	0	10	312	12	314	0	577
Mmel_00008314-RA	sp|Q6IMA7|RSLBB_RAT	80.952	168	31	1	2	168	80	247	2.34e-101	294
Mmel_00008313-RA	sp|Q5RBQ4|UBP46_PONAB	98.592	355	5	0	1	355	12	366	0	732
Mmel_00008315-RA	sp|Q5U317|FIP1_RAT	75.908	523	83	5	15	535	55	536	6.53e-164	479
Mmel_00008317-RA	sp|Q8TBB1|LNX1_HUMAN	72.079	505	139	2	6	509	128	631	0	715
Mmel_00008319-RA	sp|Q9BZM3|GSX2_HUMAN	91	100	9	0	1	100	205	304	1.13e-60	190
Mmel_00008318-RA	sp|Q9UKJ5|CHIC2_HUMAN	71.171	111	4	1	2	84	40	150	1.86e-46	150
Mmel_00008322-RA	sp|Q9PUF6|PGFRA_CHICK	98.425	127	2	0	1	127	961	1087	2.53e-79	255
Mmel_00008321-RA	sp|Q9PUF6|PGFRA_CHICK	89.146	562	42	1	1	543	37	598	0	981
Mmel_00008323-RA	sp|Q08156|KIT_CHICK	86.017	472	62	1	2	469	76	547	0	838
Mmel_00008326-RA	sp|P52583|VGFR2_COTJA	91.439	1320	113	0	1	1320	24	1343	0	2517
Mmel_00008328-RA	sp|Q9HC07|TM165_HUMAN	91.829	257	21	0	73	329	68	324	9.72e-170	479
Mmel_00008327-RA	sp|Q8AVI9|PORED_XENLA	60.526	190	72	1	21	207	128	317	1.77e-79	243
Mmel_00008330-RA	sp|A0A1B0GW35|EXC1L_HUMAN	66.197	142	48	0	28	169	30	171	6.93e-68	206
Mmel_00008331-RA	sp|Q9NV70|EXOC1_HUMAN	92.626	895	50	2	5	884	1	894	0	1700
Mmel_00008329-RA	sp|Q6YGZ4|CLOCK_TYTAL	77.419	217	23	2	112	302	186	402	2.39e-114	358
Mmel_00008332-RA	sp|Q66GS9|CP135_HUMAN	58.275	1148	362	9	18	1060	1	1136	0	1258
Mmel_00008334-RA	sp|Q5RG44|K1211_DANRE	47.51	743	309	23	586	1291	380	1078	5.58e-167	529
Mmel_00008335-RA	sp|P28173|PUR1_CHICK	95.096	469	20	2	9	474	42	510	0	914
Mmel_00008333-RA	sp|Q4L235|ACSF4_HUMAN	58.588	1048	391	10	4	1041	78	1092	0	1233
Mmel_00008337-RA	sp|P38024|PUR6_CHICK	89.762	420	15	1	15	406	7	426	0	778
Mmel_00008338-RA	sp|Q17RB8|LONF1_HUMAN	74.34	530	123	5	4	520	243	772	0	798
Mmel_00008339-RA	sp|Q9P272|TRM9B_HUMAN	58.606	459	175	8	1	453	1	450	4.07e-177	506
Mmel_00008340-RA	sp|A7E300|RHG07_BOVIN	84.968	1091	157	4	5	1095	29	1112	0	1843
Mmel_00008341-RA	sp|Q96QB1|RHG07_HUMAN	45.845	349	178	7	1	346	1	341	6.57e-80	269
Mmel_00014931-RA	sp|Q8AXV0|SH3G1_CHICK	92.857	84	6	0	8	91	284	367	1.46e-52	170
Mmel_00015200-RA	sp|P98160|PGBM_HUMAN	63.068	176	59	3	42	211	1995	2170	6.05e-57	197
Mmel_00015013-RA	sp|Q8AYC9|CHK1_CHICK	84.043	94	15	0	19	112	274	367	2.75e-48	163
Mmel_00013280-RA	sp|P28693|EPHB2_CHICK	98.261	115	2	0	164	278	853	967	2.41e-71	246
Mmel_00012470-RA	sp|Q10751|ACE_CHICK	75.591	127	29	1	42	166	1067	1193	2.62e-49	173
Mmel_00012473-RA	sp|Q99759|M3K3_HUMAN	80.916	655	75	3	3	637	2	626	0	1082
Mmel_00012471-RA	sp|Q9PT84|KCNH6_CHICK	97.712	437	10	0	32	468	369	805	0	891
Mmel_00012472-RA	sp|P61963|DCAF7_MOUSE	100	140	0	0	1	140	203	342	1.48e-101	296
Mmel_00012482-RA	sp|P09540|MLEX_CHICK	90.741	162	15	0	20	181	24	185	1.52e-107	308
Mmel_00012484-RA	sp|Q7Z3B3|KANL1_HUMAN	72.131	122	30	2	3	120	552	673	3.5e-50	176
Mmel_00012483-RA	sp|A7Z061|CDC27_BOVIN	94.559	827	36	2	19	845	8	825	0	1634
Mmel_00012479-RA	sp|Q5F485|DDX42_CHICK	88.715	957	79	5	6	950	1	940	0	1665
Mmel_00012476-RA	sp|Q67ER4|R113A_BOVIN	83.333	102	17	0	1	102	223	324	1.45e-60	191
Mmel_00012478-RA	sp|Q9D024|CCD47_MOUSE	76.546	469	61	4	1	442	1	447	0	721
Mmel_00012475-RA	sp|O15541|R113A_HUMAN	68.027	147	42	2	7	148	14	160	5.93e-56	181
Mmel_00012477-RA	sp|Q7RTN6|STRAA_HUMAN	85.203	419	62	0	1	419	13	431	0	756
Mmel_00012474-RA	sp|Q9PT84|KCNH6_CHICK	94.937	79	4	0	26	104	20	98	2.8e-48	169
Mmel_00012481-RA	sp|P25107|PTH1R_DIDVI	42.771	166	57	6	5	132	105	270	1.06e-32	124
Mmel_00013466-RA	sp|P47790|MYPR_TAEGU	75.812	277	12	2	1	222	1	277	1.42e-138	392
Mmel_00013469-RA	sp|Q5JV73|FRPD3_HUMAN	56.015	1039	349	15	2	949	788	1809	0	987
Mmel_00013468-RA	sp|P60892|PRPS1_RAT	97.473	277	7	0	6	282	42	318	0	558
Mmel_00013467-RA	sp|Q5R4W9|RAB9B_PONAB	94.527	201	11	0	17	217	1	201	5.75e-145	405
Mmel_00013840-RA	sp|P55199|ELL_HUMAN	75.812	277	60	1	35	304	46	322	2.13e-150	445
Mmel_00014784-RA	sp|Q6P6B7|ANR16_HUMAN	64.607	178	57	1	1	178	1	172	2.61e-72	224
Mmel_00015130-RA	sp|Q6GLZ8|SNR27_XENLA	60	85	28	2	16	94	68	152	2.26e-25	99
Mmel_00014735-RA	sp|Q8VDP3|MICA1_MOUSE	48.289	263	135	1	45	307	787	1048	2.72e-56	199
Mmel_00013423-RA	sp|Q9Y6X9|MORC2_HUMAN	73.652	983	213	11	1	965	77	1031	0	1393
Mmel_00015161-RA	sp|Q9N2I9|UCP3_CANLF	52.055	219	61	7	1	181	1	213	1.03e-59	191
Mmel_00013759-RA	sp|D4ACX8|PCD16_RAT	52.941	272	125	2	1	269	738	1009	7.44e-81	270
Mmel_00013758-RA	sp|Q96JQ0|PCD16_HUMAN	68.493	73	23	0	1	73	668	740	6.09e-27	107
Mmel_00013757-RA	sp|Q5XIA3|TYW4_RAT	49.045	628	256	8	17	580	55	682	2.28e-177	520
Mmel_00010535-RA	sp|Q14BT6|A4GCT_MOUSE	58.702	339	138	1	1	337	1	339	2.38e-148	424
Mmel_00010536-RA	sp|P56856|CLD18_HUMAN	61.826	241	49	3	66	265	22	260	1e-97	290
Mmel_00010540-RA	sp|Q5RAJ6|DJB11_PONAB	92.308	65	5	0	1	65	220	284	2.46e-38	133
Mmel_00010539-RA	sp|Q6TUG0|DJB11_RAT	96.8	125	4	0	229	353	76	200	1.06e-84	263
Mmel_00010537-RA	sp|P22914|CRBS_HUMAN	69.663	178	45	1	1	169	1	178	1.04e-95	277
Mmel_00010538-RA	sp|Q5ZKT1|TBCC1_CHICK	73.978	269	47	1	6	251	287	555	1.78e-145	421
Mmel_00010545-RA	sp|A1YB07|AMOL2_DANRE	49.612	645	219	14	1	543	1	641	4.81e-160	477
Mmel_00010543-RA	sp|Q9Y6M1|IF2B2_HUMAN	60.811	296	58	4	48	317	136	399	3.58e-107	330
Mmel_00010542-RA	sp|P62997|TRA2B_RAT	97.561	205	4	1	99	303	58	261	2.35e-139	398
Mmel_00010544-RA	sp|Q91ZX6|SENP2_MOUSE	60.889	225	88	0	377	601	364	588	1.89e-96	310
Mmel_00010547-RA	sp|Q00910|SO2A1_RAT	56.786	280	86	3	64	308	209	488	2.87e-101	316
Mmel_00010546-RA	sp|P34925|RYK_HUMAN	89.541	545	41	2	7	551	79	607	0	989
Mmel_00010557-RA	sp|Q32KQ2|WDR53_BOVIN	65.826	357	118	3	1	353	1	357	2.29e-171	484
Mmel_00010551-RA	sp|Q6XQG9|G3ST2_PIG	55.294	85	37	1	266	349	48	132	7.39e-22	99.4
Mmel_00010555-RA	sp|Q96LK0|CEP19_HUMAN	68.098	163	52	0	52	214	1	163	8.42e-81	241
Mmel_00010559-RA	sp|B2RYR0|RN168_RAT	41.749	606	290	16	10	604	10	563	2.64e-105	332
Mmel_00010560-RA	sp|Q5REY7|UBXN7_PONAB	78.469	418	55	3	18	403	75	489	0	665
Mmel_00010552-RA	sp|A6NM10|AQ12B_HUMAN	52.805	303	125	3	1	298	1	290	3.05e-97	291
Mmel_00010550-RA	sp|P02789|TRFE_CHICK	74.363	706	162	4	33	720	1	705	0	1098
Mmel_00010556-RA	sp|P0CH38|FBSP1_RAT	99.32	147	1	0	2	148	84	230	6.36e-107	306
Mmel_00010554-RA	sp|Q8TBF5|PIGX_HUMAN	42.424	198	111	1	1	195	60	257	3.84e-55	178
Mmel_00010553-RA	sp|Q64303|PAK2_RAT	87.786	524	46	2	7	513	1	523	0	926
Mmel_00010548-RA	sp|P47758|SRPRB_MOUSE	74.713	87	21	1	1	87	184	269	1.96e-40	136
Mmel_00010549-RA	sp|Q4FZX7|SRPRB_RAT	68.235	85	27	0	1	85	51	135	5.48e-39	132
Mmel_00014109-RA	sp|Q15878|CAC1E_HUMAN	79.928	279	37	4	1	277	1872	2133	1.39e-136	429
Mmel_00015114-RA	sp|P84087|CPLX2_RAT	100	119	0	0	1	119	16	134	2.13e-77	227
Mmel_00014079-RA	sp|P31362|PO2F3_MOUSE	43.75	224	37	2	3	137	45	268	3.63e-45	156
Mmel_00014830-RA	sp|P46058|EDSP_CYNPY	50.857	175	84	1	46	220	1	173	2.65e-54	179
Mmel_00013627-RA	sp|Q9NPG3|UBN1_HUMAN	59.13	690	211	15	1	630	456	1134	0	615
Mmel_00013625-RA	sp|Q6PJ21|SPSB3_HUMAN	92.806	139	10	0	1	139	103	241	3.17e-95	282
Mmel_00013626-RA	sp|Q9NPG3|UBN1_HUMAN	62.195	82	27	2	64	141	2	83	9.98e-22	94.4
Mmel_00013628-RA	sp|O60437|PEPL_HUMAN	64.744	1716	506	8	3	1635	55	1754	0	2120
Mmel_00009352-RA	sp|Q90596|MAFK_CHICK	100	125	0	0	1	125	32	156	2.47e-85	248
Mmel_00009355-RA	sp|Q9BT73|PSMG3_HUMAN	70.492	122	36	0	31	152	1	122	1.47e-60	186
Mmel_00009350-RA	sp|Q6P4S8|INT1_MOUSE	80.529	2193	320	10	174	2334	3	2120	0	3413
Mmel_00009351-RA	sp|Q6P7A9|LYAG_RAT	66.019	103	35	0	1	103	443	545	1.71e-43	153
Mmel_00009353-RA	sp|Q4QQS1|T184A_RAT	68.243	296	62	5	22	288	132	424	2.99e-134	389
Mmel_00009349-RA	sp|Q8IY33|MILK2_HUMAN	59.375	224	65	5	10	214	25	241	4.17e-72	258
Mmel_00009356-RA	sp|P0C7U0|ELFN1_HUMAN	70.053	374	99	3	1	361	11	384	0	535
Mmel_00009363-RA	sp|P55884|EIF3B_HUMAN	89.954	647	39	1	1	621	168	814	0	1223
Mmel_00009359-RA	sp|Q9CPY0|MRM2_MOUSE	63.229	223	79	2	2	221	17	239	5.23e-96	283
Mmel_00009360-RA	sp|P53369|8ODP_RAT	70.796	113	25	1	6	118	51	155	1.36e-51	162
Mmel_00009362-RA	sp|Q9Y5X2|SNX8_HUMAN	85.615	431	57	1	15	440	32	462	0	760
Mmel_00009358-RA	sp|Q9Y6D9|MD1L1_HUMAN	66.463	328	110	0	1	328	1	328	8.76e-141	418
Mmel_00009365-RA	sp|P58308|OX2R_MOUSE	26.772	381	228	12	14	366	57	414	1.4e-34	136
Mmel_00009364-RA	sp|Q9NRB3|CHSTC_HUMAN	87.817	197	24	0	123	319	218	414	8.64e-128	374
Mmel_00009366-RA	sp|Q6DGJ1|GRIFN_DANRE	56.204	137	60	0	1	137	3	139	2.55e-59	182
Mmel_00009367-RA	sp|Q6GPA5|TTYH3_XENLA	76.289	388	91	1	22	409	90	476	0	622
Mmel_00009370-RA	sp|Q400G9|AMZ1_HUMAN	69.935	306	80	2	20	318	16	316	1.31e-146	426
Mmel_00009369-RA	sp|D2I4M3|BRAT1_AILME	46.038	795	365	11	9	758	48	823	0	610
Mmel_00009368-RA	sp|Q6PCQ0|IQCE_MOUSE	44.665	553	262	10	2	517	11	556	2.04e-129	399
Mmel_00009371-RA	sp|P27600|GNA12_MOUSE	98.058	206	4	0	1	206	174	379	3.18e-148	419
Mmel_00009372-RA	sp|Q03113|GNA12_HUMAN	87.838	74	9	0	1	74	102	175	1.02e-42	150
Mmel_00009373-RA	sp|Q9BXL7|CAR11_HUMAN	78.257	1159	231	8	1	1150	8	1154	0	1825
Mmel_00009374-RA	sp|Q8AV58|SDK1_CHICK	90.098	1424	133	2	67	1483	229	1651	0	2608
Mmel_00009375-RA	sp|Q8AV58|SDK1_CHICK	97.692	130	3	0	11	140	1950	2079	1.99e-81	264
Mmel_00009378-RA	sp|P85037|FOXK1_HUMAN	82.716	486	64	2	7	472	248	733	0	751
Mmel_00009376-RA	sp|P24463|CP3AC_CANLF	60.879	478	179	2	7	482	25	496	0	629
Mmel_00009379-RA	sp|Q3U829|AP5Z1_MOUSE	53.753	826	306	11	6	788	14	806	0	827
Mmel_00009377-RA	sp|Q64464|CP3AD_MOUSE	60.364	439	165	2	24	462	69	498	0	578
Mmel_00014325-RA	sp|P61983|1433G_RAT	100	218	0	0	16	233	30	247	1.39e-162	452
Mmel_00009143-RA	sp|Q76KB2|H6ST1_CHICK	99.153	236	2	0	18	253	173	408	3.05e-175	491
Mmel_00009145-RA	sp|A1KXE4|F168B_HUMAN	97.949	195	4	0	1	195	1	195	2.06e-127	359
Mmel_00009146-RA	sp|Q9NR80|ARHG4_HUMAN	72.747	455	84	3	3	420	190	641	0	693
Mmel_00009144-RA	sp|Q5F3S2|PKHB2_CHICK	90.625	224	18	1	1	221	1	224	1.49e-147	412
Mmel_00009149-RA	sp|Q8N944|AMER3_HUMAN	49.183	551	233	10	1	541	1	514	1.73e-148	466
Mmel_00009153-RA	sp|Q6TFL4|KLH24_HUMAN	96.667	600	20	0	1	600	1	600	0	1217
Mmel_00009154-RA	sp|Q9ULM3|YETS2_HUMAN	58.925	986	183	18	24	801	29	1000	0	1030
Mmel_00009156-RA	sp|D3ZQJ0|CLD15_RAT	46.25	240	78	2	83	320	1	191	8.92e-58	190
Mmel_00009158-RA	sp|P50593|GPC1_CHICK	89.655	232	24	0	1	232	248	479	1.65e-154	444
Mmel_00009157-RA	sp|Q4G0W2|DUS28_HUMAN	70.423	142	42	0	2	143	17	158	2.27e-64	197
Mmel_00009155-RA	sp|Q2KHV4|PARL_BOVIN	80.515	272	53	0	15	286	106	377	4.42e-167	471
Mmel_00009159-RA	sp|P78333|GPC5_HUMAN	53.712	229	106	0	3	231	109	337	1.74e-85	268
Mmel_00014853-RA	sp|Q6GLB9|EMX1_XENTR	98.333	60	1	0	2	61	119	178	1.99e-33	118
Mmel_00014663-RA	sp|Q5ZM88|ASXL2_CHICK	63.325	379	94	8	226	560	941	1318	1.11e-122	395
Mmel_00012107-RA	sp|E1BYA3|PTSS2_CHICK	98.034	407	4	1	3	409	40	442	0	821
Mmel_00012105-RA	sp|Q6IA17|SIGIR_HUMAN	51.584	221	70	2	12	195	73	293	2.64e-59	193
Mmel_00012106-RA	sp|A1A5B4|ANO9_HUMAN	50.914	766	298	14	45	748	9	758	0	746
Mmel_00012108-RA	sp|P38935|SMBP2_HUMAN	75.275	182	45	0	145	326	237	418	1.62e-87	286
Mmel_00012112-RA	sp|P19965|SP15_TETCF	46.631	564	264	6	45	603	149	680	1.85e-172	509
Mmel_00012111-RA	sp|P19965|SP15_TETCF	37.037	135	85	0	19	153	21	155	4.6e-28	112
Mmel_00012110-RA	sp|Q96A58|RERG_HUMAN	42.778	180	95	3	1	180	22	193	3.04e-41	141
Mmel_00012109-RA	sp|Q2TBS2|RM21_BOVIN	75.706	177	41	2	1	177	34	208	4.69e-92	270
Mmel_00012113-RA	sp|Q9NVM6|DJC17_HUMAN	73.871	310	68	4	1	307	1	300	1.65e-143	409
Mmel_00012116-RA	sp|Q5R6Z1|RMD3_PONAB	55.524	353	140	7	6	354	128	467	1.07e-124	369
Mmel_00012117-RA	sp|P52787|IF_MOUSE	36.709	395	197	11	66	420	36	417	8.25e-57	195
Mmel_00012115-RA	sp|P99025|GFRP_MOUSE	80.597	67	13	0	1	67	18	84	1.5e-35	117
Mmel_00012114-RA	sp|Q8CE97|CO062_MOUSE	41.379	174	94	4	1	168	1	172	7.59e-31	112
Mmel_00012122-RA	sp|Q9Y4D2|DGLA_HUMAN	83.843	1046	127	9	1	1009	1	1041	0	1712
Mmel_00014664-RA	sp|P62282|RS11_RAT	100	79	0	0	1	79	80	158	1.97e-53	166
Mmel_00013798-RA	sp|Q8WU66|TSEAR_HUMAN	61.443	402	104	3	2	359	189	583	6.45e-168	486
Mmel_00013797-RA	sp|Q5RF84|UB2G2_PONAB	93.711	159	10	0	38	196	7	165	3.56e-109	312
Mmel_00015174-RA	sp|P98157|LRP1_CHICK	100	62	0	0	1	62	3986	4047	4.86e-40	141
Mmel_00012669-RA	sp|P32248|CCR7_HUMAN	71.217	337	93	3	1	334	43	378	7.57e-161	457
Mmel_00012665-RA	sp|Q28706|K1C12_RABIT	73.834	386	97	2	621	1006	29	410	0	577
Mmel_00012668-RA	sp|O54941|SMCE1_MOUSE	93.924	395	23	1	1	395	18	411	0	731
Mmel_00012667-RA	sp|Q8N1A0|KT222_HUMAN	70.69	290	75	1	1	280	1	290	2.85e-144	409
Mmel_00012664-RA	sp|Q99PS0|K1C23_MOUSE	50.234	428	201	6	1	426	1	418	2.25e-132	390
Mmel_00012662-RA	sp|Q6PVZ1|K1C14_CHICK	86.686	338	34	2	2	328	130	467	0	554
Mmel_00012588-RA	sp|Q5R979|PGM2L_PONAB	81.026	585	102	1	17	592	37	621	0	1015
Mmel_00012589-RA	sp|Q9JHI3|SO2B1_RAT	45.723	643	224	11	21	540	41	681	4.46e-173	508
Mmel_00012591-RA	sp|Q38PU4|GRIK1_MACFA	75.045	557	33	6	36	489	365	918	0	814
Mmel_00012592-RA	sp|Q60934|GRIK1_MOUSE	82.661	248	14	1	17	235	120	367	2.31e-143	424
Mmel_00014178-RA	sp|B4DU55|ZN879_HUMAN	51.852	297	128	2	1	297	280	561	1.24e-102	313
Mmel_00014948-RA	sp|Q61772|EPHA7_MOUSE	72.523	222	61	0	16	237	55	276	5.91e-115	354
Mmel_00014612-RA	sp|Q62230|SN_MOUSE	43.546	705	377	11	7	697	7	704	2.45e-170	534
Mmel_00014630-RA	sp|O43581|SYT7_HUMAN	91.843	331	18	1	1	322	73	403	0	631
Mmel_00014718-RA	sp|P52802|EFNA2_CHICK	95.876	97	3	1	1	96	42	138	1.56e-65	200
Mmel_00014065-RA	sp|Q9TTU3|CLCN5_RABIT	84.57	512	70	3	61	563	1	512	0	899
Mmel_00012460-RA	sp|Q8NFT6|DBF4B_HUMAN	46.931	277	133	4	1	269	76	346	1.21e-67	230
Mmel_00012461-RA	sp|A2AG06|MEIOC_MOUSE	57.717	920	369	13	5	906	32	949	0	1031
Mmel_00012462-RA	sp|P46459|NSF_HUMAN	93.004	243	17	0	2	244	6	248	2.28e-166	480
Mmel_00012466-RA	sp|P04458|KRFB_CHICK	79.208	101	18	1	1	101	1	98	1.51e-46	147
Mmel_00012463-RA	sp|P46459|NSF_HUMAN	96.089	179	7	0	1	179	541	719	4.03e-118	354
Mmel_00012464-RA	sp|Q4R8M9|GTSF1_MACFA	52.98	151	65	2	22	167	7	156	2.69e-52	167
Mmel_00012465-RA	sp|P04458|KRFB_CHICK	80.198	101	17	1	117	217	1	98	1.24e-45	149
Mmel_00014714-RA	sp|A6NFN3|RFOX3_HUMAN	79.197	274	9	2	8	269	75	312	5.85e-126	363
Mmel_00015074-RA	sp|Q2HYU2|PFKAM_PIG	80	95	19	0	1	95	679	773	2.81e-51	174
Mmel_00013892-RA	sp|Q29042|FCN1_PIG	60.841	309	110	2	8	305	16	324	2.83e-133	384
Mmel_00014777-RA	sp|Q6PP77|XKR2_HUMAN	56.902	297	128	0	1	297	153	449	2.8e-124	365
Mmel_00008546-RA	sp|Q9HCJ6|VAT1L_HUMAN	93.798	258	16	0	1	258	86	343	0	511
Mmel_00008547-RA	sp|Q80TB8|VAT1L_MOUSE	96.667	60	2	0	1	60	358	417	4.44e-34	122
Mmel_00008548-RA	sp|O75596|CLC3A_HUMAN	71.939	196	54	1	1	195	1	196	4.66e-107	308
Mmel_00008553-RA	sp|Q96NW4|ANR27_HUMAN	79.182	831	173	0	1	831	3	833	0	1360
Mmel_00008555-RA	sp|Q2HJH9|PDCD5_BOVIN	86.538	104	13	1	1	104	23	125	1.38e-60	184
Mmel_00008552-RA	sp|Q6XK22|R9BP_CHICK	97.89	237	5	0	1	237	1	237	1.76e-173	479
Mmel_00008551-RA	sp|Q5ZL13|NUD19_CHICK	80.556	144	28	0	1	144	235	378	3.88e-83	251
Mmel_00008550-RA	sp|Q587J7|TDR12_HUMAN	48.17	683	298	7	257	884	424	1105	0	640
Mmel_00008556-RA	sp|O15943|CADN_DROME	39.201	1602	882	42	69	1603	528	2104	0	978
Mmel_00008559-RA	sp|Q8TCN5|ZN507_HUMAN	62.368	946	327	10	1	929	1	934	0	1140
Mmel_00008558-RA	sp|Q6ZPD9|D19L3_HUMAN	77.314	551	125	0	78	628	166	716	0	889
Mmel_00008560-RA	sp|Q63HK5|TSH3_HUMAN	91.948	1068	84	2	3	1068	14	1081	0	1976
Mmel_00008561-RA	sp|O15090|ZN536_HUMAN	86.816	713	94	0	1	713	1	713	0	1306
Mmel_00008562-RA	sp|Q3B7M7|RMP_BOVIN	63.458	509	130	11	26	508	44	522	0	553
Mmel_00008563-RA	sp|P49707|CCNE1_CHICK	88.286	350	41	0	1	350	47	396	0	658
Mmel_00008564-RA	sp|Q1NZ26|YSMU_CAEEL	48.131	214	106	3	1	209	64	277	5.7e-68	212
Mmel_00008565-RA	sp|Q8WUR0|CS012_MOUSE	62.411	141	52	1	13	152	1	141	1.02e-44	146
Mmel_00008566-RA	sp|Q68FU1|PKHF1_RAT	72.401	279	71	2	8	280	1	279	5.6e-146	413
Mmel_00008567-RA	sp|Q2KIB9|RPP29_BOVIN	76.142	197	47	0	50	246	24	220	2.27e-106	309
Mmel_00008568-RA	sp|Q5ZLR5|UCRI_CHICK	77.289	273	45	3	1	257	1	272	2.66e-149	420
Mmel_00008570-RA	sp|Q9JI35|HRH3_CAVPO	54.396	364	133	4	14	358	87	436	1.39e-126	374
Mmel_00008572-RA	sp|Q9Y5N6|ORC6_HUMAN	60.952	210	80	2	2	210	40	248	4.27e-82	248
Mmel_00008569-RA	sp|Q8NEM2|SHCBP_HUMAN	67.496	643	198	3	23	662	38	672	0	879
Mmel_00008571-RA	sp|Q96QK1|VPS35_HUMAN	98.485	792	12	0	1	792	2	793	0	1617
Mmel_00008575-RA	sp|Q8TD30|ALAT2_HUMAN	90.045	442	44	0	30	471	82	523	0	849
Mmel_00008576-RA	sp|P86345|BORE2_CHICK	67.148	277	53	3	5	252	5	272	1.07e-107	316
Mmel_00008573-RA	sp|Q32MK0|MYLK3_HUMAN	47.296	795	335	18	25	796	22	755	0	637
Mmel_00008577-RA	sp|Q2HJ94|DNJA2_BOVIN	86.269	386	24	3	18	374	27	412	0	624
Mmel_00008574-RA	sp|Q5XG50|CE087_XENLA	80.435	138	27	0	23	160	7	144	3.48e-67	203
Mmel_00008578-RA	sp|Q8BNJ6|NETO2_MOUSE	87.354	514	57	1	19	524	12	525	0	957
Mmel_00008581-RA	sp|Q7TSH2|KPBB_MOUSE	83.723	1069	174	0	2	1070	17	1085	0	1876
Mmel_00008579-RA	sp|Q8TB96|TIP_HUMAN	87.826	345	42	0	26	370	268	612	0	649
Mmel_00008580-RA	sp|Q99KW9|TIP_MOUSE	47.396	192	75	5	5	188	64	237	2.04e-40	149
Mmel_00015202-RA	sp|Q7TNM2|TRI46_MOUSE	76.433	157	37	0	1	157	272	428	2.94e-78	251
Mmel_00013298-RA	sp|A1A4N1|S29A3_BOVIN	53.763	465	160	7	4	423	20	474	2.55e-158	458
Mmel_00013299-RA	sp|C5IAW9|UN5BB_XENLA	64.806	412	69	4	381	723	538	942	1.93e-175	529
Mmel_00014724-RA	sp|Q9H5P4|PDZD7_HUMAN	78.049	287	63	0	17	303	28	314	4.9e-159	461
Mmel_00010797-RA	sp|P61132|SIAT6_PANTR	86.667	120	16	0	23	142	130	249	1.13e-70	221
Mmel_00010798-RA	sp|A2A8L5|PTPRF_MOUSE	75.15	998	221	12	2	992	921	1898	0	1466
Mmel_00010799-RA	sp|Q13332|PTPRS_HUMAN	49.915	589	171	6	1	479	257	831	3.27e-167	522
Mmel_00010800-RA	sp|Q5T013|HYI_HUMAN	66.864	169	56	0	1	169	108	276	1.23e-86	258
Mmel_00010803-RA	sp|Q96G25|MED8_HUMAN	88.06	268	32	0	1	268	1	268	5.54e-173	480
Mmel_00010802-RA	sp|Q5T011|SZT2_HUMAN	59.771	3674	1089	56	1	3546	20	3432	0	4003
Mmel_00014892-RA	sp|P28666|MUG2_MOUSE	44.915	118	62	1	7	121	1317	1434	3.59e-25	102
Mmel_00014827-RA	sp|A0A0R4IXF6|KAT2A_DANRE	77.122	271	14	1	1	223	525	795	2.77e-143	422
Mmel_00015047-RA	sp|O70454|BUD31_RAT	99.306	144	1	0	1	144	1	144	2.87e-104	296
Mmel_00014058-RA	sp|Q969N2|PIGT_HUMAN	79.304	517	107	0	26	542	62	578	0	875
Mmel_00014057-RA	sp|Q96EV8|DTBP1_HUMAN	53.165	158	71	2	2	159	176	330	3.38e-48	162
Mmel_00011527-RA	sp|Q9H992|MARH7_HUMAN	63.695	617	182	13	112	701	67	668	0	613
Mmel_00011530-RA	sp|Q5ZMC3|WSDU1_CHICK	80.713	477	87	4	1	473	1	476	0	787
Mmel_00011529-RA	sp|Q9DE13|BAZ2B_CHICK	88.154	1815	151	9	268	2067	363	2128	0	2883
Mmel_00011533-RA	sp|Q9C0D5|TANC1_HUMAN	67.968	1870	515	24	22	1838	23	1861	0	2376
Mmel_00011537-RA	sp|Q8HZY8|CC148_MACFA	46.483	327	171	1	1	327	62	384	2.79e-91	287
Mmel_00011539-RA	sp|Q90ZK6|ACVR1_CHICK	77.778	495	66	4	57	511	14	504	0	737
Mmel_00011536-RA	sp|Q99569|PKP4_HUMAN	85.333	1200	157	14	4	1192	1	1192	0	2027
Mmel_00011538-RA	sp|O95045|UPP2_HUMAN	78.629	248	53	0	107	354	24	271	7.21e-147	421
Mmel_00011048-RA	sp|Q9UM82|SPAT2_HUMAN	66.983	527	157	7	1	523	7	520	0	677
Mmel_00011047-RA	sp|Q4U5R4|RN114_BOVIN	77.778	162	36	0	74	235	48	209	1.1e-94	279
Mmel_00011049-RA	sp|Q5ZJ75|SL9A8_CHICK	89.649	570	22	1	4	536	5	574	0	1012
Mmel_00011050-RA	sp|O43286|B4GT5_HUMAN	88.857	350	35	1	58	403	34	383	0	664
Mmel_00011051-RA	sp|Q14721|KCNB1_HUMAN	93.622	392	24	1	19	410	189	579	0	755
Mmel_00011054-RA	sp|O95793|STAU1_HUMAN	88.086	512	54	2	159	669	69	574	0	912
Mmel_00011055-RA	sp|P55060|XPO2_HUMAN	94.969	974	41	2	6	978	1	967	0	1870
Mmel_00011052-RA	sp|Q32L50|SBSPO_BOVIN	53.608	194	82	2	14	199	71	264	1.43e-67	210
Mmel_00011057-RA	sp|Q9Y6D5|BIG2_HUMAN	85.841	1801	212	10	1	1794	9	1773	0	3128
Mmel_00011058-RA	sp|Q8TCU6|PREX1_HUMAN	80.702	1596	276	7	24	1610	74	1646	0	2633
Mmel_00011060-RA	sp|Q8IWU5|SULF2_HUMAN	84.81	869	123	6	30	897	1	861	0	1522
Mmel_00011061-RA	sp|Q9Y6Q9|NCOA3_HUMAN	70.72	1431	329	16	91	1441	1	1421	0	1907
Mmel_00013776-RA	sp|Q9UGH3|S23A2_HUMAN	84.848	198	16	1	1	198	466	649	4.43e-113	339
Mmel_00013775-RA	sp|B0JZG0|S23A2_XENTR	91.379	116	9	1	21	136	159	273	2.43e-67	217
Mmel_00014582-RA	sp|Q10567|AP1B1_HUMAN	100	209	0	0	37	245	176	384	8.56e-143	426
Mmel_00014872-RA	sp|Q8BUR4|DOCK1_MOUSE	49.772	219	57	2	25	243	1153	1318	1.8e-57	201
Mmel_00009683-RA	sp|Q68Y56|TLR4_PIG	45.301	830	439	6	14	837	5	825	0	713
Mmel_00009684-RA	sp|Q13049|TRI32_HUMAN	84.769	650	95	2	2	647	4	653	0	1131
Mmel_00009686-RA	sp|P79251|VATG1_BOVIN	80	90	18	0	23	112	29	118	3.12e-49	155
Mmel_00014935-RA	sp|Q80SU7|GVIN1_MOUSE	41.749	606	343	6	2	604	1787	2385	2.39e-147	474
Mmel_00014385-RA	sp|Q15047|SETB1_HUMAN	66.743	436	128	7	1	424	657	1087	0	545
Mmel_00014384-RA	sp|O88974|SETB1_MOUSE	65.152	396	88	7	2	364	140	518	9.51e-160	484
Mmel_00013147-RA	sp|Q5RFT9|NOL4L_PONAB	90.419	334	25	1	7	333	103	436	0	575
Mmel_00013152-RA	sp|Q9UPG8|PLAL2_HUMAN	83.936	498	74	3	36	529	1	496	0	810
Mmel_00013149-RA	sp|Q8IXJ9|ASXL1_HUMAN	51.049	1573	647	31	70	1570	20	1541	0	1237
Mmel_00013150-RA	sp|O15066|KIF3B_HUMAN	89.29	747	73	1	1	740	1	747	0	1297
Mmel_00013151-RA	sp|Q6EV70|OFUT1_RAT	72.297	296	61	1	1	275	100	395	5.83e-157	445
Mmel_00013153-RA	sp|Q92544|TM9S4_HUMAN	89.548	641	60	2	4	637	2	642	0	1153
Mmel_00015059-RA	sp|Q9Y320|TMX2_HUMAN	89.071	183	20	0	1	183	1	183	2.3e-121	347
Mmel_00014525-RA	sp|Q92542|NICA_HUMAN	54.691	437	161	5	1	401	274	709	2.2e-158	465
Mmel_00015156-RA	sp|Q95KF9|NO40_MACFA	73.438	64	17	0	1	64	1	64	2.24e-27	101
Mmel_00014843-RA	sp|P46531|NOTC1_HUMAN	65	180	26	1	22	164	557	736	1.18e-71	237
Mmel_00010475-RA	sp|Q9Z2F5|CTBP1_RAT	97.548	367	9	0	8	374	2	368	0	748
Mmel_00010478-RA	sp|E1C760|UVSSA_CHICK	73.351	379	87	5	3	377	34	402	0	561
Mmel_00010476-RA	sp|Q5F398|MAEA_CHICK	70.543	129	0	1	27	117	24	152	6.42e-53	174
Mmel_00010479-RA	sp|E1C760|UVSSA_CHICK	79.692	325	50	6	16	337	419	730	1.16e-169	492
Mmel_00010477-RA	sp|Q5F398|MAEA_CHICK	100	244	0	0	1	244	153	396	0	520
Mmel_00010484-RA	sp|Q9PTG8|TACC3_XENLA	41.802	988	404	27	1	875	1	930	0	583
Mmel_00010481-RA	sp|Q5ZKN5|FA53A_CHICK	92.652	313	20	2	1	311	1	312	0	557
Mmel_00010483-RA	sp|Q5ZI25|TM129_CHICK	95.848	289	12	0	1	289	74	362	0	589
Mmel_00010482-RA	sp|Q14493|SLBP_HUMAN	69.112	259	67	4	213	469	19	266	4e-107	322
Mmel_00011015-RA	sp|A9UM79|DRS7C_XENTR	70.418	311	73	2	1	293	1	310	2.55e-158	446
Mmel_00011017-RA	sp|O95838|GLP2R_HUMAN	50.144	347	106	5	110	392	207	550	6.2e-98	308
Mmel_00011016-RA	sp|Q4V922|GSG1L_DANRE	44.13	247	84	4	10	204	5	249	4.19e-63	202
Mmel_00011019-RA	sp|Q60780|GAS7_MOUSE	90	200	18	1	4	201	121	320	2.16e-131	378
Mmel_00011018-RA	sp|O55148|GAS7_RAT	96.591	88	3	0	1	88	330	417	2.06e-56	182
Mmel_00011026-RA	sp|P13538|MYSS_CHICK	95.076	264	13	0	17	280	1130	1393	1.21e-160	494
Mmel_00011022-RA	sp|P02565|MYH1B_CHICK	97.683	518	10	1	6	523	383	898	0	1084
Mmel_00011028-RA	sp|P13538|MYSS_CHICK	87.097	279	23	2	1	266	1049	1327	6.64e-147	455
Mmel_00011024-RA	sp|P02565|MYH1B_CHICK	98.54	137	2	0	1	137	80	216	1.22e-94	301
Mmel_00011020-RA	sp|Q9TV62|MYH4_PIG	83.222	1794	249	5	763	2535	1	1763	0	3050
Mmel_00011027-RA	sp|P02565|MYH1B_CHICK	93.801	613	38	0	181	793	17	629	0	1245
Mmel_00011023-RA	sp|Q9TV61|MYH1_PIG	81.773	203	34	3	57	258	796	996	1.33e-100	324
Mmel_00011029-RA	sp|Q5SX40|MYH1_MOUSE	84.746	118	18	0	1	118	783	900	4.19e-64	214
Mmel_00011021-RA	sp|P13538|MYSS_CHICK	96.078	51	1	1	28	77	1889	1939	7.57e-22	90.5
Mmel_00011043-RA	sp|Q99KS6|ADPRM_MOUSE	62.57	179	67	0	3	181	156	334	5.24e-86	259
Mmel_00011041-RA	sp|Q9TV62|MYH4_PIG	78.191	1183	224	7	65	1219	68	1244	0	1902
Mmel_00011034-RA	sp|Q8MJV0|MYH1_HORSE	91.475	434	35	1	212	645	547	978	0	816
Mmel_00011031-RA	sp|P13542|MYH8_MOUSE	55.249	543	148	9	49	512	1407	1933	5.22e-155	489
Mmel_00011038-RA	sp|P13538|MYSS_CHICK	93.706	143	9	0	1	143	1251	1393	5.35e-83	268
Mmel_00011039-RA	sp|P13538|MYSS_CHICK	96.269	134	5	0	7	140	1114	1247	9.83e-76	248
Mmel_00011037-RA	sp|P02565|MYH1B_CHICK	86.359	997	108	4	3	974	2	995	0	1782
Mmel_00011033-RA	sp|Q9TV62|MYH4_PIG	63.668	289	94	2	3	282	811	1097	7.25e-100	324
Mmel_00011042-RA	sp|A1A4J8|SCO1_BOVIN	80.814	172	33	0	41	212	131	302	9.25e-105	306
Mmel_00011036-RA	sp|Q8MJV0|MYH1_HORSE	88.306	248	29	0	213	460	651	898	5.03e-153	483
Mmel_00011032-RA	sp|P02565|MYH1B_CHICK	96.471	85	3	0	1	85	391	475	1.94e-51	175
Mmel_00011040-RA	sp|P02565|MYH1B_CHICK	74.129	603	141	1	7	594	1329	1931	0	849
Mmel_00011044-RA	sp|P47809|MP2K4_MOUSE	94.136	324	2	1	1	307	72	395	0	627
Mmel_00011045-RA	sp|Q8IZQ8|MYCD_HUMAN	59.362	972	294	21	1	905	1	938	0	858
Mmel_00003193-RA	sp|Q8BHE5|BMP3_MOUSE	64.402	368	120	3	6	365	104	468	2.75e-169	483
Mmel_00003197-RA	sp|Q9BW91|NUDT9_HUMAN	80.139	287	57	0	11	297	62	348	1.09e-176	494
Mmel_00003198-RA	sp|P23499|SPRL1_COTJA	61.538	676	225	10	26	675	1	667	0	762
Mmel_00003196-RA	sp|Q9P2G9|KLHL8_HUMAN	89.677	620	59	2	1	615	1	620	0	1175
Mmel_00003200-RA	sp|P79780|SIAL_CHICK	49.153	295	101	10	1	265	1	276	1.56e-41	146
Mmel_00003202-RA	sp|P23498|OSTP_CHICK	54.43	237	77	4	1	237	19	224	1.07e-53	177
Mmel_00003203-RA	sp|Q13563|PKD2_HUMAN	82.592	764	131	2	1	763	206	968	0	1222
Mmel_00003210-RA	sp|Q9Y3D5|RT18C_HUMAN	67.568	111	33	1	20	130	35	142	7.49e-51	160
Mmel_00003204-RA	sp|Q9UNQ0|ABCG2_HUMAN	62.857	665	174	9	1	602	1	655	0	838
Mmel_00003209-RA	sp|Q8TDG4|HELQ_HUMAN	67.298	1003	309	8	47	1041	101	1092	0	1335
Mmel_00003211-RA	sp|Q5ZHS0|ABRX1_CHICK	84.236	406	62	2	1	405	1	405	0	687
Mmel_00003208-RA	sp|Q90YK5|HPSE_CHICK	77.632	380	85	0	1	380	144	523	0	615
Mmel_00003207-RA	sp|Q2KIQ4|COQ2_BOVIN	75	144	36	0	144	287	211	354	3.57e-77	242
Mmel_00003206-RA	sp|Q9JI48|PLAC8_MOUSE	70.536	112	30	1	10	121	4	112	3.75e-49	155
Mmel_00003205-RA	sp|Q5REK4|PLAC8_PONAB	69.136	81	25	0	81	161	35	115	3.58e-32	115
Mmel_00003213-RA	sp|Q5ZLL8|GPAT3_CHICK	62.779	403	139	1	2	404	47	438	0	559
Mmel_00003214-RA	sp|Q5ZLL8|GPAT3_CHICK	93.151	365	25	0	1	365	82	446	0	718
Mmel_00003216-RA	sp|P98191|CDS1_MOUSE	77.206	408	66	1	13	420	39	419	0	647
Mmel_00003215-RA	sp|Q60554|NKX61_MESAU	91.463	82	7	0	164	245	282	363	9.3e-45	156
Mmel_00003217-RA	sp|Q8IZQ1|WDFY3_HUMAN	90.596	3573	283	11	1	3568	1	3525	0	6725
Mmel_00003218-RA	sp|Q8N3J5|PPM1K_HUMAN	76.471	391	73	1	1	391	1	372	0	612
Mmel_00003219-RA	sp|P50851|LRBA_HUMAN	73.367	1806	421	19	142	1907	73	1858	0	2558
Mmel_00003220-RA	sp|Q8BPP1|MB212_MOUSE	99.679	312	1	0	1	312	1	312	0	643
Mmel_00003222-RA	sp|Q9ESE1|LRBA_MOUSE	88.75	80	9	0	4	83	2777	2856	2.97e-47	163
Mmel_00003221-RA	sp|P50851|LRBA_HUMAN	87.87	338	31	2	120	457	2461	2788	0	633
Mmel_00003224-RA	sp|Q8N568|DCLK2_HUMAN	89.126	469	49	2	1	467	253	721	0	834
Mmel_00003225-RA	sp|Q3YC04|MCR_AOTNA	76.599	594	124	7	1	588	1	585	0	842
Mmel_00003226-RA	sp|Q9N0W8|MCR_SAISC	94.483	145	8	0	1	145	838	982	6.54e-94	294
Mmel_00003227-RA	sp|A1A4S6|RHG10_HUMAN	71.831	426	71	7	13	393	162	583	0	596
Mmel_00003229-RA	sp|Q6P2P2|ANM9_HUMAN	74.638	828	203	3	20	843	21	845	0	1274
Mmel_00003230-RA	sp|Q5ZMP3|T184C_CHICK	95.833	408	17	0	7	414	38	445	0	789
Mmel_00003232-RA	sp|P25101|EDNRA_HUMAN	62.143	140	46	3	50	182	1	140	2.22e-48	165
Mmel_00003231-RA	sp|P21450|EDNRA_BOVIN	84.321	287	45	0	1	287	141	427	1.13e-175	494
Mmel_00003233-RA	sp|Q2UVH8|ACRO_MELGA	51.765	170	76	2	70	233	83	252	2.07e-57	193
Mmel_00003234-RA	sp|P62313|LSM6_MOUSE	88.889	81	8	1	14	94	1	80	1.58e-46	146
Mmel_00003235-RA	sp|Q17R98|ZN827_HUMAN	83.713	307	25	1	19	325	795	1076	7.2e-166	504
Mmel_00003236-RA	sp|Q8IVH4|MMAA_HUMAN	79.019	367	76	1	59	425	50	415	0	611
Mmel_00003237-RA	sp|Q9I962|SMAD1_COTJA	97.984	248	5	0	1	248	218	465	0	513
Mmel_00003238-RA	sp|Q1JQA2|SMAD1_BOVIN	100	133	0	0	1	133	1	133	6.51e-93	280
Mmel_00003241-RA	sp|Q9UM13|APC10_HUMAN	100	109	0	0	1	109	1	109	2.72e-78	231
Mmel_00003239-RA	sp|Q01804|OTUD4_HUMAN	57.739	1150	405	21	1	1129	25	1114	0	1201
Mmel_00003240-RA	sp|P61222|ABCE1_MOUSE	98.497	599	9	0	1	599	1	599	0	1227
Mmel_00003246-RA	sp|O88573|AFF1_MOUSE	42.503	887	431	22	25	846	338	1210	1.2e-150	477
Mmel_00003247-RA	sp|Q12923|PTN13_HUMAN	66.448	2286	672	24	1	2237	241	2480	0	2895
Mmel_00003248-RA	sp|Q12923|PTN13_HUMAN	90.714	140	13	0	13	152	43	182	3.77e-84	272
Mmel_00003250-RA	sp|P53779|MK10_HUMAN	89.904	208	1	1	12	219	80	267	7.65e-132	381
Mmel_00003249-RA	sp|P49187|MK10_RAT	89.498	219	3	1	13	231	266	464	9.67e-137	398
Mmel_00003251-RA	sp|Q5U2Z7|RHG24_RAT	83.273	550	88	3	8	554	200	748	0	923
Mmel_00003252-RA	sp|Q8N264|RHG24_HUMAN	95.833	72	3	0	36	107	128	199	4.17e-42	149
Mmel_00003254-RA	sp|Q6MZP7|LIN54_HUMAN	77.805	811	89	10	1	782	1	749	0	1170
Mmel_00003256-RA	sp|Q5F3X8|SC31A_CHICK	83.258	884	108	3	2	845	1	884	0	1494
Mmel_00003258-RA	sp|Q5F3X8|SC31A_CHICK	77.734	256	39	7	84	331	982	1227	2.62e-116	366
Mmel_00003255-RA	sp|Q9H5L6|THAP9_HUMAN	40.541	851	446	10	1	839	70	872	0	584
Mmel_00003253-RA	sp|A7Y521|CSN4_PIG	93.194	382	4	1	3	362	25	406	0	725
Mmel_00003262-RA	sp|Q5ZI72|HNRDL_CHICK	98.925	279	3	0	1	279	1	279	0	564
Mmel_00003259-RA	sp|Q2KIA4|SCD5_BOVIN	87.747	253	23	1	13	257	83	335	5.19e-167	468
Mmel_00003260-RA	sp|B9EJG8|T150C_HUMAN	90	180	18	0	17	196	1	180	8.69e-118	337
Mmel_00003261-RA	sp|Q9UHY7|ENOPH_HUMAN	75.966	233	39	1	1	216	29	261	3.59e-130	370
Mmel_00003263-RA	sp|Q13237|KGP2_HUMAN	77.07	785	144	3	1	772	1	762	0	1243
Mmel_00003264-RA	sp|Q5RC04|RGF1B_PONAB	91.202	466	40	1	6	471	1	465	0	905
Mmel_00003265-RA	sp|O97827|AGRL3_BOVIN	98.513	269	4	0	2	270	200	468	0	565
Mmel_00003266-RA	sp|Q5HYJ1|TECRL_HUMAN	70.046	217	46	1	1	217	151	348	1.14e-111	327
Mmel_00003268-RA	sp|P30876|RPB2_HUMAN	99.659	1174	4	0	1	1174	1	1174	0	2446
Mmel_00003269-RA	sp|Q61581|IBP7_MOUSE	81.579	76	14	0	2	77	206	281	2.36e-39	133
Mmel_00003267-RA	sp|Q32LB9|NOA1_BOVIN	61.489	309	114	3	1	305	384	691	1.27e-129	387
Mmel_00003272-RA	sp|Q15034|HERC3_HUMAN	85.714	931	105	2	38	947	127	1050	0	1631
Mmel_00003270-RA	sp|Q9UII4|HERC5_HUMAN	35.512	566	330	12	19	565	95	644	2.64e-93	312
Mmel_00003271-RA	sp|Q5PQN1|HERC4_RAT	41.231	325	148	6	1	300	748	1054	2.9e-63	218
Mmel_00003273-RA	sp|O94988|FA13A_HUMAN	78.624	683	137	3	36	718	350	1023	0	1046
Mmel_00003274-RA	sp|Q6ZVF9|GRIN3_HUMAN	78.462	130	26	1	658	787	649	776	4.28e-59	218
Mmel_00003276-RA	sp|Q13201|MMRN1_HUMAN	53.294	1017	455	9	33	1035	218	1228	0	1107
Mmel_00003277-RA	sp|Q1RMS0|CCSE1_BOVIN	61.188	505	187	6	1	500	1	501	4.78e-173	508
Mmel_00003278-RA	sp|Q9H4L7|SMRCD_HUMAN	68.421	1045	288	15	1	1022	1	1026	0	1419
Mmel_00003280-RA	sp|Q4U4D2|OPN4_PODSI	65.261	498	115	7	38	530	1	445	0	624
Mmel_00003279-RA	sp|O73888|HPGDS_CHICK	79.724	217	26	1	1	217	1	199	3.91e-125	354
Mmel_00003284-RA	sp|Q05438|BMR1B_CHICK	97.012	502	14	1	30	530	1	502	0	1018
Mmel_00003285-RA	sp|Q7T2Z5|UNC5C_CHICK	96.797	562	18	0	37	598	370	931	0	1130
Mmel_00003286-RA	sp|P52306|GDS1_HUMAN	92.593	486	36	0	1	486	122	607	0	890
Mmel_00003289-RA	sp|Q5ZIM5|MAP1_CHICK	82.569	436	24	4	3	438	2	385	0	727
Mmel_00003288-RA	sp|P63074|IF4E_RAT	96.552	203	5	1	15	217	17	217	3.29e-146	408
Mmel_00003290-RA	sp|P80467|ADHX_SAAHA	91.599	369	31	0	45	413	2	370	0	697
Mmel_00003287-RA	sp|Q17QJ5|TSN5_BOVIN	100	203	0	0	1	203	45	247	2.31e-146	410
Mmel_00013649-RA	sp|Q3T0H0|LCMT1_BOVIN	73.939	165	43	0	3	167	162	326	4.65e-85	259
Mmel_00013648-RA	sp|Q68EM7|RHG17_HUMAN	81.429	420	77	1	1	420	78	496	0	725
Mmel_00013646-RA	sp|Q28728|SC5AB_RABIT	79.167	96	19	1	1	96	65	159	2.9e-43	152
Mmel_00014214-RA	sp|Q07498|EPHB3_CHICK	93.729	590	19	2	1	572	44	633	0	1147
Mmel_00011458-RA	sp|Q0P5A1|DCTN3_BOVIN	70.13	154	46	0	4	157	33	186	2.85e-73	220
Mmel_00011457-RA	sp|Q8N5L8|RP25L_HUMAN	53.623	138	64	0	1	138	1	138	2.78e-52	167
Mmel_00011459-RA	sp|Q9D772|F219A_MOUSE	99.248	133	1	0	3	135	25	157	1.87e-94	271
Mmel_00011461-RA	sp|Q29RJ1|AP4A_BOVIN	64.384	146	50	2	12	157	1	144	1.27e-66	202
Mmel_00011462-RA	sp|Q5T7B8|KIF24_HUMAN	51.395	1111	465	22	1	1068	1	1079	0	981
Mmel_00011466-RA	sp|Q5T6F2|UBAP2_HUMAN	63.073	872	244	13	34	862	1	837	0	872
Mmel_00011464-RA	sp|Q5F3R7|DCA12_CHICK	81.418	409	22	3	23	409	51	427	0	664
Mmel_00011463-RA	sp|Q5XIS7|UBAP1_RAT	71.036	473	111	6	3	471	52	502	0	642
Mmel_00014701-RA	sp|Q3ZBA3|PKHA2_BOVIN	63.534	266	76	6	2	251	165	425	5.6e-109	323
Mmel_00015196-RA	sp|Q5R5V7|ADDB_PONAB	69.608	102	31	0	1	102	62	163	1.08e-43	153
Mmel_00015108-RA	sp|Q8IY17|PLPL6_HUMAN	85.922	206	29	0	1	206	493	698	1.16e-121	377
Mmel_00013642-RA	sp|Q765H6|MGT5B_MOUSE	77.778	108	22	1	1	106	439	546	1.24e-43	162
Mmel_00013643-RA	sp|Q765H6|MGT5B_MOUSE	78.409	88	19	0	1	88	254	341	5.34e-42	148
Mmel_00014825-RA	sp|O43688|PLPP2_HUMAN	69.935	153	22	2	1	129	88	240	8.58e-70	216
Mmel_00014920-RA	sp|Q6PHE8|CC124_DANRE	67.097	155	47	2	1	155	1	151	1.38e-55	177
Mmel_00012013-RA	sp|Q5ZIW5|VAC14_CHICK	92.473	465	32	1	1	462	1	465	0	877
Mmel_00012015-RA	sp|P00491|PNPH_HUMAN	61.566	281	108	0	6	286	2	282	4.33e-126	363
Mmel_00012014-RA	sp|Q8IYT2|CMTR2_HUMAN	66.016	768	257	1	22	785	1	768	0	1080
Mmel_00012020-RA	sp|P51863|VA0D1_MOUSE	93.069	101	7	0	1	101	1	101	7e-63	197
Mmel_00012018-RA	sp|A5YKK6|CNOT1_HUMAN	95.797	2379	58	2	1	2340	1	2376	0	4749
Mmel_00012017-RA	sp|Q6JWR2|S38A7_RAT	83.333	372	62	0	1	372	92	463	0	625
Mmel_00012016-RA	sp|P00508|AATM_CHICK	89.724	399	25	1	5	387	25	423	0	756
Mmel_00012021-RA	sp|Q5R6I1|VA0D1_PONAB	85.2	250	5	1	23	240	102	351	2.16e-153	433
Mmel_00012022-RA	sp|P51661|DHI2_MOUSE	64.317	227	81	0	63	289	155	381	1.59e-101	305
Mmel_00012019-RA	sp|Q5ZK17|SETD6_CHICK	85.219	433	63	1	23	455	16	447	0	745
Mmel_00014725-RA	sp|P51570|GALK1_HUMAN	70.866	127	37	0	24	150	266	392	4.22e-56	183
Mmel_00014501-RA	sp|Q9UBL3|ASH2L_HUMAN	83.607	183	5	2	142	299	446	628	2.28e-97	302
Mmel_00014502-RA	sp|Q9DG09|STAR_CHICK	88.018	217	26	0	1	217	1	217	5.26e-130	372
Mmel_00014985-RA	sp|Q9R237|JIP1_RAT	40.506	237	69	9	314	523	304	495	6.33e-26	115
Mmel_00004331-RA	sp|P61214|ARL4A_RAT	97.409	193	5	0	27	219	8	200	2.72e-139	390
Mmel_00004330-RA	sp|Q5ZIV9|ADSV_CHICK	90.149	335	33	0	13	347	220	554	0	642
Mmel_00004332-RA	sp|P50549|ETV1_HUMAN	81.798	445	38	3	161	605	76	477	0	749
Mmel_00004334-RA	sp|A0JPQ8|ALKMO_RAT	51.678	149	72	0	2	150	273	421	1.2e-49	167
Mmel_00004336-RA	sp|P50222|MEOX2_HUMAN	73.786	103	21	2	1	102	97	194	1.18e-34	123
Mmel_00004335-RA	sp|P50222|MEOX2_HUMAN	95.522	134	6	0	15	148	171	304	1.39e-90	268
Mmel_00004333-RA	sp|P49621|DGKB_RAT	71.622	74	10	1	1	63	712	785	9.86e-26	101
Mmel_00004338-RA	sp|Q28CZ7|ISPD_XENTR	50	150	71	1	3	152	228	373	1.5e-42	148
Mmel_00004340-RA	sp|A6H759|LRC72_BOVIN	40.458	262	115	3	14	238	31	288	2.97e-58	189
Mmel_00004339-RA	sp|Q6VYA3|SOSD1_CHICK	95.146	206	10	0	1	206	1	206	1.75e-147	410
Mmel_00004341-RA	sp|Q5ZMD2|ANKY2_CHICK	92.252	413	30	1	1	411	47	459	0	759
Mmel_00004343-RA	sp|Q3ZBV0|TSN13_BOVIN	85.311	177	25	1	21	196	28	204	2.9e-99	288
Mmel_00004342-RA	sp|Q5ZL42|BZW2_CHICK	98.54	411	6	0	1	411	1	411	0	834
Mmel_00004344-RA	sp|O88312|AGR2_MOUSE	77.401	177	33	2	1	172	1	175	3.81e-99	286
Mmel_00004345-RA	sp|Q8R3W7|AGR3_MOUSE	88.415	164	19	0	9	172	1	164	2.95e-109	311
Mmel_00004346-RA	sp|Q95LD9|AHR_DELLE	62.879	792	259	15	27	811	82	845	0	957
Mmel_00004347-RA	sp|Q9Y5W8|SNX13_HUMAN	91.183	964	85	0	1	964	5	968	0	1811
Mmel_00004349-RA	sp|Q5ZKH6|HDAC9_CHICK	98.947	190	2	0	1	190	32	221	6e-129	377
Mmel_00004350-RA	sp|Q5ZKH6|HDAC9_CHICK	89.542	306	16	1	125	430	305	594	3.46e-173	500
Mmel_00004351-RA	sp|Q6NZM9|HDAC4_MOUSE	65.812	117	40	0	4	120	943	1059	1.19e-42	158
Mmel_00004352-RA	sp|Q923Z4|FER3L_MOUSE	58.659	179	46	4	25	187	2	168	4.3e-53	170
Mmel_00004354-RA	sp|Q6ZN28|MACC1_HUMAN	64.09	841	298	4	36	872	11	851	0	1124
Mmel_00004355-RA	sp|P26012|ITB8_HUMAN	72.702	707	178	3	3	706	72	766	0	1070
Mmel_00004357-RA	sp|P08183|MDR1_HUMAN	58.758	1256	494	7	31	1282	35	1270	0	1525
Mmel_00004361-RA	sp|Q02446|SP4_HUMAN	96.875	224	7	0	1	224	561	784	3.62e-164	475
Mmel_00004360-RA	sp|Q62445|SP4_MOUSE	82.478	565	77	8	66	616	2	558	0	697
Mmel_00004363-RA	sp|Q96GN5|CDA7L_HUMAN	63.457	457	148	8	8	455	8	454	0	553
Mmel_00004365-RA	sp|Q92565|RPGF5_HUMAN	87.073	410	52	1	29	438	172	580	0	746
Mmel_00004366-RA	sp|Q8C0Q9|RPGF5_MOUSE	71.111	180	52	0	122	301	16	195	4.92e-85	275
Mmel_00004368-RA	sp|Q90YI0|IL6_CHICK	67.568	148	34	1	1	134	92	239	9.71e-68	207
Mmel_00004369-RA	sp|Q5ZM13|HYCCI_CHICK	95.146	515	25	0	1	515	1	515	0	989
Mmel_00004372-RA	sp|Q90372|QNR71_COTJA	82.309	537	93	1	1	537	25	559	0	937
Mmel_00004373-RA	sp|Q96EH3|MASU1_HUMAN	67.376	141	46	0	11	151	84	224	1.33e-70	215
Mmel_00004370-RA	sp|Q8IXQ5|KLHL7_HUMAN	98.535	546	8	0	2	547	40	585	0	1137
Mmel_00004374-RA	sp|Q5ZLP8|IF2B3_CHICK	100	180	0	0	9	188	405	584	1.7e-123	363
Mmel_00004375-RA	sp|Q5ZLP8|IF2B3_CHICK	99.505	202	1	0	1	202	158	359	8.45e-143	413
Mmel_00004378-RA	sp|A4D161|F221A_HUMAN	76.744	258	57	1	19	276	22	276	2.46e-150	425
Mmel_00004377-RA	sp|Q96EE4|CC126_HUMAN	79.286	140	28	1	1	139	1	140	3.4e-70	210
Mmel_00004376-RA	sp|Q13595|TRA2A_HUMAN	77.381	168	10	2	187	346	106	253	1.2e-72	230
Mmel_00004380-RA	sp|P28673|NPY_CHICK	93.75	48	3	0	1	48	45	92	1.3e-25	95.1
Mmel_00004381-RA	sp|Q9NZW5|MPP6_HUMAN	94.553	459	25	0	148	606	82	540	0	902
Mmel_00004382-RA	sp|O60443|GSDME_HUMAN	50.499	501	228	5	67	560	5	492	1.28e-164	485
Mmel_00004383-RA	sp|Q9H4L5|OSBL3_HUMAN	80	545	94	1	168	697	343	887	0	925
Mmel_00004384-RA	sp|P00018|CYC_DRONO	96.19	105	4	0	1	105	1	105	2.91e-71	210
Mmel_00004385-RA	sp|Q9DGD4|GNIH_COTJA	66.082	171	58	0	20	190	1	171	2.18e-76	230
Mmel_00004387-RA	sp|Q9Y4A8|NF2L3_HUMAN	48.026	456	217	6	45	483	242	694	1.23e-121	374
Mmel_00004391-RA	sp|Q5R6X7|CBX3_PONAB	95.652	184	7	1	1	184	1	183	3.62e-127	357
Mmel_00004388-RA	sp|A7VJC2|ROA2_RAT	95.415	349	13	1	1	346	5	353	0	649
Mmel_00004392-RA	sp|Q9CWT3|SNX10_MOUSE	70.588	204	54	2	25	225	1	201	6.89e-82	245
Mmel_00004393-RA	sp|Q5FVW6|SKAP2_XENTR	86.364	66	9	0	8	73	263	328	2.93e-37	129
Mmel_00004397-RA	sp|P17277|HXA4_CHICK	91.304	115	8	2	23	135	195	309	2.5e-70	216
Mmel_00004403-RA	sp|P31258|HXA11_CHICK	90	210	18	2	1	209	90	297	7.9e-109	317
Mmel_00004396-RA	sp|Q08727|HXA2_CHICK	96.094	128	5	0	1	128	1	128	4.85e-82	250
Mmel_00004394-RA	sp|Q08821|HXA1_XENLA	84.821	112	17	0	44	155	128	239	1.16e-64	200
Mmel_00004395-RA	sp|Q08727|HXA2_CHICK	94.422	251	11	1	34	284	128	375	1.74e-166	469
Mmel_00004398-RA	sp|Q6B3N0|HXA5_CHICK	94.961	258	13	0	1	258	1	258	2.72e-178	495
Mmel_00004400-RA	sp|Q90VZ9|HXA7_CHICK	96.939	98	3	0	2	99	122	219	8.39e-66	200
Mmel_00004401-RA	sp|P09631|HXA9_MOUSE	100	69	0	0	30	98	203	271	1.33e-44	147
Mmel_00004405-RA	sp|Q86VP1|TAXB1_HUMAN	86.567	134	18	0	1	134	71	204	1.74e-77	246
Mmel_00004406-RA	sp|Q2KJE0|TAXB1_BOVIN	64.593	627	184	7	4	614	208	812	0	780
Mmel_00004404-RA	sp|Q2HJD7|3HIDH_BOVIN	89.571	163	17	0	1	163	174	336	6.96e-106	308
Mmel_00004407-RA	sp|Q5RDF5|JAZF1_PONAB	99.123	114	1	0	43	156	130	243	4.98e-82	244
Mmel_00004409-RA	sp|Q8K1L0|CREB5_MOUSE	94.643	168	9	0	22	189	190	357	1.64e-90	271
Mmel_00004410-RA	sp|Q80XD1|CHIO_MOUSE	89.157	332	36	0	1	332	1	332	0	629
Mmel_00004415-RA	sp|F1MS15|PKHA8_BOVIN	63.158	513	129	3	5	461	12	520	0	626
Mmel_00004412-RA	sp|Q9Z0G8|WIPF3_RAT	64	100	33	3	86	182	32	131	9.51e-29	114
Mmel_00004413-RA	sp|P83939|SCRN1_BOVIN	66.053	380	75	3	6	349	53	414	8.29e-177	499
Mmel_00004414-RA	sp|Q5R941|FKB14_PONAB	91.241	137	12	0	1	137	75	211	3.66e-88	258
Mmel_00004419-RA	sp|Q8CIF4|BTD_MOUSE	61.047	516	188	3	15	523	10	519	0	657
Mmel_00004416-RA	sp|Q9Y215|COLQ_HUMAN	61.376	378	101	4	15	347	78	455	2.49e-127	375
Mmel_00004420-RA	sp|O15084|ANR28_HUMAN	92.982	1026	62	1	4	1029	38	1053	0	1918
Mmel_00004417-RA	sp|Q9QXE0|HACL1_MOUSE	69.922	256	50	1	4	232	15	270	1.08e-121	367
Mmel_00004421-RA	sp|Q8N3T1|GLT15_HUMAN	66.452	465	143	4	99	555	180	639	0	634
Mmel_00004422-RA	sp|Q7T0X7|OXND1_XENLA	60.294	340	106	3	29	367	3	314	3.08e-144	414
Mmel_00004423-RA	sp|Q804A9|DAZL_CHICK	73.723	274	68	3	112	384	2	272	9.14e-141	404
Mmel_00011779-RA	sp|Q92611|EDEM1_HUMAN	86.825	463	54	1	1	456	195	657	0	836
Mmel_00011778-RA	sp|Q66HA6|ARL8B_RAT	88.235	170	4	1	1	154	1	170	2.89e-107	306
Mmel_00011781-RA	sp|Q14833|GRM4_HUMAN	92.391	276	21	0	10	285	619	894	1.14e-176	515
Mmel_00011780-RA	sp|P35400|GRM7_RAT	96.947	131	4	0	3	133	687	817	2.07e-82	263
Mmel_00015050-RA	sp|Q5NVI9|DNJA1_PONAB	49.73	185	70	3	1	165	215	396	1.39e-49	167
Mmel_00011295-RA	sp|Q5NVQ3|FGF1_PONAB	53.614	166	23	3	1	153	1	125	5.75e-47	152
Mmel_00011302-RA	sp|Q9UHB7|AFF4_HUMAN	85.129	928	126	6	1	926	243	1160	0	1342
Mmel_00011297-RA	sp|A4FV08|GNPI1_BOVIN	93.035	201	13	1	1	200	89	289	1.66e-136	386
Mmel_00011300-RA	sp|Q8TBK6|ZCH10_HUMAN	83.607	61	10	0	1	61	37	97	9.38e-34	120
Mmel_00011299-RA	sp|Q5RDM4|HSP74_PONAB	85.342	805	113	3	42	842	37	840	0	1383
Mmel_00011298-RA	sp|Q9UBS8|RNF14_HUMAN	77.872	470	96	2	1	463	1	469	0	728
Mmel_00011296-RA	sp|Q5U2S1|NFIP1_RAT	90.865	208	19	0	27	234	14	221	4.69e-128	363
Mmel_00011307-RA	sp|P51161|FABP6_HUMAN	65.979	97	33	0	2	98	32	128	1.11e-42	138
Mmel_00011309-RA	sp|Q96N64|PWP2A_HUMAN	87.965	565	63	2	23	587	196	755	0	961
Mmel_00011306-RA	sp|O77681|GDF9_SHEEP	46.899	258	123	5	1	245	89	345	3.54e-68	220
Mmel_00011308-RA	sp|Q9D8U4|C1QT2_MOUSE	85.784	204	29	0	70	273	91	294	4.41e-117	340
Mmel_00011314-RA	sp|Q8BMI0|FBX38_MOUSE	74.102	1197	249	15	1	1139	1	1194	0	1734
Mmel_00011312-RA	sp|Q28938|IL12B_PIG	35.65	331	148	13	3	279	2	321	6.49e-45	157
Mmel_00011311-RA	sp|Q99614|TTC1_HUMAN	50.211	237	52	4	12	186	60	292	1.58e-59	190
Mmel_00011317-RA	sp|P50443|S26A2_HUMAN	69.253	683	200	5	18	696	43	719	0	943
Mmel_00011316-RA	sp|P50443|S26A2_HUMAN	57.87	432	175	3	36	460	54	485	3.63e-170	499
Mmel_00011320-RA	sp|Q86YN6|PRGC2_HUMAN	49.292	706	263	15	243	869	334	1023	1.17e-150	472
Mmel_00011315-RA	sp|O70528|5HT4R_CAVPO	82.84	169	17	1	1	157	1	169	1.91e-93	278
Mmel_00011319-RA	sp|Q8R2Q0|TRI29_MOUSE	32.751	229	147	4	40	267	167	389	2.59e-24	105
Mmel_00013540-RA	sp|Q9QUS6|TRIM1_MOUSE	77.419	496	47	3	16	473	237	705	0	788
Mmel_00009519-RA	sp|Q9H0C1|ZMY12_HUMAN	57.143	105	45	0	2	106	144	248	2.93e-37	132
Mmel_00009531-RA	sp|O43827|ANGL7_HUMAN	76.724	348	79	2	1	348	1	346	0	572
Mmel_00009526-RA	sp|P19623|SPEE_HUMAN	89.08	174	19	0	1	174	128	301	2.46e-117	337
Mmel_00009532-RA	sp|P42346|MTOR_RAT	92.083	1402	54	3	2	1346	16	1417	0	2589
Mmel_00009530-RA	sp|P42345|MTOR_HUMAN	86.9	229	4	1	1	203	1437	1665	2.52e-133	415
Mmel_00009529-RA	sp|P42345|MTOR_HUMAN	91.549	284	6	2	1	266	1789	2072	1.07e-173	533
Mmel_00009527-RA	sp|Q01780|EXOSX_HUMAN	69.871	853	243	7	7	856	37	878	0	1206
Mmel_00009528-RA	sp|P42345|MTOR_HUMAN	89.352	216	7	1	1	216	2345	2544	3.18e-127	399
Mmel_00009534-RA	sp|B9U3F2|DISP3_CHICK	85.778	1125	71	7	6	1041	1	1125	0	1896
Mmel_00009535-RA	sp|B9U3F2|DISP3_CHICK	87.273	110	14	0	1	110	1229	1338	1.79e-49	171
Mmel_00009533-RA	sp|Q5ZKS8|UBIA1_CHICK	95.341	279	13	0	11	289	54	332	0	533
Mmel_00009540-RA	sp|Q6RW13|ATRAP_HUMAN	61.739	115	43	1	8	122	29	142	1.27e-46	151
Mmel_00009539-RA	sp|B6ZI38|DRAXI_CHICK	78.818	203	36	4	2	198	48	249	1.44e-102	305
Mmel_00009537-RA	sp|Q923V4|FBX6_RAT	60	240	96	0	1	240	10	249	2.88e-111	324
Mmel_00009538-RA	sp|Q4KWZ6|MD2L2_CHICK	100	211	0	0	28	238	1	211	1.34e-155	433
Mmel_00009536-RA	sp|Q9UK22|FBX2_HUMAN	68.75	240	70	3	21	255	57	296	8.11e-120	346
Mmel_00009543-RA	sp|P51797|CLCN6_HUMAN	90.488	841	57	2	3	821	30	869	0	1506
Mmel_00009544-RA	sp|P18908|ANF_CHICK	85	140	21	0	1	140	1	140	1.28e-75	224
Mmel_00009548-RA	sp|Q6DDG2|K2013_XENLA	80.969	289	55	0	80	368	316	604	6.1e-177	508
Mmel_00009547-RA	sp|P08217|CEL2A_HUMAN	64.602	113	40	0	22	134	7	119	4.02e-49	160
Mmel_00009542-RA	sp|P42898|MTHR_HUMAN	76.699	618	84	3	33	590	31	648	0	971
Mmel_00009546-RA	sp|P16067|ANPRB_RAT	50	178	71	1	272	449	804	963	4.5e-47	177
Mmel_00009549-RA	sp|Q80U63|MFN2_MOUSE	91.287	746	63	1	714	1457	12	757	0	1428
Mmel_00009550-RA	sp|Q5JXC2|MIIP_HUMAN	46.405	153	74	4	206	358	138	282	2.29e-34	133
Mmel_00009552-RA	sp|Q5THJ4|VP13D_HUMAN	75.971	2189	483	13	5	2175	1	2164	0	3311
Mmel_00009551-RA	sp|P20333|TNR1B_HUMAN	35.118	467	254	12	380	822	18	459	1.9e-57	207
Mmel_00009553-RA	sp|Q5THJ4|VP13D_HUMAN	86.31	168	23	0	15	182	4221	4388	7.9e-97	310
Mmel_00009554-RA	sp|O88876|DHRS3_MOUSE	64.463	242	29	2	18	202	61	302	1.43e-102	301
Mmel_00009555-RA	sp|Q5VUY2|ADCL4_HUMAN	50.852	352	173	0	1508	1859	56	407	1.54e-117	381
Mmel_00009556-RA	sp|A2VDH3|LRC38_MOUSE	77.654	179	40	0	15	193	38	216	6.85e-101	298
Mmel_00009559-RA	sp|Q13029|PRDM2_HUMAN	68.754	1533	412	27	44	1534	171	1678	0	1711
Mmel_00009558-RA	sp|Q13029|PRDM2_HUMAN	84.211	76	12	0	1	76	1	76	2.37e-39	140
Mmel_00009560-RA	sp|Q674X7|KAZRN_HUMAN	90.937	331	13	1	1	314	77	407	0	580
Mmel_00009561-RA	sp|Q9NW97|TMM51_HUMAN	63.636	121	43	1	39	159	128	247	9.54e-45	150
Mmel_00009566-RA	sp|Q99JZ7|ERRFI_MOUSE	64.454	467	157	6	1	464	1	461	0	541
Mmel_00009562-RA	sp|Q9Y3D3|RT16_HUMAN	50.625	160	47	3	1	154	1	134	1.33e-49	159
Mmel_00009563-RA	sp|Q9Y2W3|S45A1_HUMAN	73.063	542	135	3	20	560	47	578	0	678
Mmel_00009567-RA	sp|Q8UW59|PARK7_CHICK	95.238	189	9	0	1	189	1	189	1.94e-131	369
Mmel_00009570-RA	sp|P56645|PER3_HUMAN	46.689	1178	485	29	3	1084	44	1174	0	813
Mmel_00009572-RA	sp|Q9Y6Y1|CMTA1_HUMAN	82.635	668	107	4	31	695	223	884	0	1110
Mmel_00009571-RA	sp|Q15836|VAMP3_HUMAN	98.276	58	1	0	40	97	24	81	1.05e-35	120
Mmel_00009577-RA	sp|Q99PG6|TS1R1_MOUSE	43.511	262	135	3	9	266	284	536	9.7e-65	221
Mmel_00009574-RA	sp|Q5U458|DJC11_MOUSE	90.458	262	25	0	212	473	298	559	1.85e-174	504
Mmel_00009575-RA	sp|Q5U575|KLH21_XENLA	71.429	126	30	1	1	120	487	612	1.7e-58	192
Mmel_00009576-RA	sp|Q1H9T6|TZAP_MOUSE	95.434	219	10	0	1	219	336	554	1.6e-150	438
Mmel_00009573-RA	sp|A2A891|CMTA1_MOUSE	97.436	39	1	0	28	66	40	78	9.22e-21	87
Mmel_00014587-RA	sp|P13903|TWIST_XENLA	88.636	88	9	1	1	88	80	166	7.35e-53	165
Mmel_00014665-RA	sp|P49356|FNTB_HUMAN	84.615	351	54	0	18	368	47	397	0	612
Mmel_00014748-RA	sp|Q3UNH4|GRIN1_MOUSE	53.982	226	82	8	300	504	708	932	5.93e-54	198
Mmel_00004814-RA	sp|P27658|CO8A1_HUMAN	61.976	739	172	8	2	634	1	736	5.01e-163	489
Mmel_00004818-RA	sp|P36551|HEM6_HUMAN	85.768	267	38	0	1	267	187	453	2.64e-176	496
Mmel_00004819-RA	sp|Q9UNY4|TTF2_HUMAN	66.667	621	155	5	465	1042	551	1162	0	837
Mmel_00004821-RA	sp|B2RPY5|GP161_MOUSE	75.862	522	90	2	1	486	18	539	0	791
Mmel_00004815-RA	sp|Q9Y274|SIA10_HUMAN	74.37	238	61	0	19	256	92	329	3.37e-134	384
Mmel_00004824-RA	sp|P79778|TBXT_CHICK	84.39	410	42	2	11	419	1	389	0	706
Mmel_00004822-RA	sp|O75663|TIPRL_HUMAN	85	260	39	0	5	264	6	265	1.06e-160	450
Mmel_00004823-RA	sp|O95562|SFT2B_HUMAN	62.162	185	45	2	1	185	1	160	1.83e-74	223
Mmel_00004827-RA	sp|Q07507|DERM_HUMAN	74.51	102	24	1	1	100	1	102	1.29e-42	140
Mmel_00004828-RA	sp|P08251|AT1B1_CHICK	84.262	305	36	1	1	293	1	305	0	531
Mmel_00004830-RA	sp|Q9H2G9|GO45_HUMAN	71.311	366	103	2	1	365	24	388	0	535
Mmel_00004829-RA	sp|Q9Y5B8|NDK7_HUMAN	58.824	272	91	2	16	287	2	252	1e-115	340
Mmel_00004833-RA	sp|O60779|S19A2_HUMAN	74.61	449	111	2	1	448	46	492	0	650
Mmel_00004831-RA	sp|Q6AYN9|CC181_RAT	38.259	494	219	11	12	426	8	494	1.54e-67	226
Mmel_00004836-RA	sp|Q5R4D7|S35A5_PONAB	66.667	435	129	6	1	431	1	423	0	563
Mmel_00004837-RA	sp|Q8AXP2|CCD80_CHICK	89.636	907	87	3	7	906	52	958	0	1509
Mmel_00004834-RA	sp|Q28107|FA5_BOVIN	56.161	771	303	11	1106	1844	1443	2210	0	888
Mmel_00004835-RA	sp|Q9CPX6|ATG3_MOUSE	92.833	293	21	0	3	295	22	314	0	546
Mmel_00004839-RA	sp|Q8N3Z3|GTPB8_HUMAN	83.929	112	18	0	6	117	113	224	1.77e-64	203
Mmel_00004840-RA	sp|Q6NW34|NEPRO_HUMAN	35.31	371	199	12	1	344	88	444	5.68e-49	180
Mmel_00004838-RA	sp|Q2YHT7|MOR1A_CHICK	57.143	105	45	0	99	203	190	294	5.62e-32	123
Mmel_00004842-RA	sp|Q9BWV1|BOC_HUMAN	73.087	1111	289	7	67	1170	6	1113	0	1549
Mmel_00004845-RA	sp|P02659|APOV1_CHICK	59.434	106	43	0	1	106	1	106	5.43e-39	129
Mmel_00004844-RA	sp|Q32NM7|ILDR1_XENLA	53.905	525	197	16	83	579	17	524	5.79e-142	425
Mmel_00004843-RA	sp|Q96MT7|CFA44_HUMAN	54.909	876	375	5	36	894	105	977	0	989
Mmel_00004847-RA	sp|Q5RDV7|CLDN1_PONAB	79.216	255	46	3	4	253	1	253	1.88e-150	422
Mmel_00004846-RA	sp|Q0VDU3|GPR15_MOUSE	58.286	350	138	4	23	366	13	360	2.74e-138	400
Mmel_00004853-RA	sp|Q5ZM96|QTRT2_CHICK	84.592	331	49	2	1	329	86	416	0	590
Mmel_00004851-RA	sp|Q8IYS0|GRM1C_HUMAN	65.404	607	192	10	115	712	59	656	0	738
Mmel_00004854-RA	sp|P19020|DRD3_RAT	61.656	459	129	5	1	425	1	446	0	539
Mmel_00004852-RA	sp|Q8NCU4|CC191_HUMAN	41.125	907	462	13	131	1012	44	903	6.38e-180	553
Mmel_00004855-RA	sp|Q9HC78|ZBT20_HUMAN	91.654	671	50	5	1	668	74	741	0	1265
Mmel_00004856-RA	sp|Q98987|NEUM_SERCA	98.095	210	4	0	3	212	4	213	7.19e-135	383
Mmel_00004857-RA	sp|Q08DK1|IGS11_BOVIN	75.656	419	93	3	6	418	22	437	0	592
Mmel_00004859-RA	sp|P38573|UPK1B_BOVIN	66.803	244	77	1	29	268	1	244	6e-123	353
Mmel_00004861-RA	sp|Q2M1Z3|RHG31_HUMAN	58.333	576	196	12	2	569	143	682	1.96e-167	541
Mmel_00004864-RA	sp|Q9P2W7|B3GA1_HUMAN	63.081	344	117	3	1	344	1	334	1.12e-153	437
Mmel_00004867-RA	sp|Q6GL42|TM39A_XENTR	88.679	371	36	2	1	365	1	371	0	682
Mmel_00004865-RA	sp|Q5EA87|B4GT3_BOVIN	50.571	350	165	2	1	343	1	349	2.7e-116	345
Mmel_00004869-RA	sp|Q7XJJ7|FAAH_ARATH	38.321	548	281	13	29	526	64	604	5.27e-103	325
Mmel_00004866-RA	sp|O60513|B4GT4_HUMAN	70.435	345	95	4	3	345	1	340	1.68e-175	493
Mmel_00004868-RA	sp|Q9CYC3|TM39A_MOUSE	93.506	77	5	0	17	93	410	486	4.01e-41	143
Mmel_00004872-RA	sp|Q8TAA9|VANG1_HUMAN	87.407	270	32	1	5	272	1	270	1.17e-149	432
Mmel_00004870-RA	sp|Q86WJ1|CHD1L_HUMAN	75.598	836	199	3	33	866	43	875	0	1313
Mmel_00004873-RA	sp|P19204|CASQ2_CHICK	94.574	258	14	0	3	260	107	364	3.12e-177	496
Mmel_00004875-RA	sp|Q8N8X9|MB213_HUMAN	66.48	358	119	1	1	358	1	357	3.86e-178	501
Mmel_00004874-RA	sp|Q8IZD6|S22AF_HUMAN	82.562	562	82	2	1	561	1	547	0	891
Mmel_00004876-RA	sp|P09572|AT1A1_CHICK	95.969	1017	41	0	57	1073	5	1021	0	2002
Mmel_00004880-RA	sp|Q95LR0|CFA91_MACFA	56.158	682	273	6	1	678	76	735	0	738
Mmel_00004878-RA	sp|P97535|PLA1A_RAT	65.291	412	143	0	16	427	16	427	0	566
Mmel_00004879-RA	sp|Q9ES82|POPD2_MOUSE	70.866	254	74	0	1	254	1	254	6.13e-136	390
Mmel_00004881-RA	sp|Q5YJC2|GSK3B_SPECI	83.646	373	14	2	5	377	95	420	0	626
Mmel_00004882-RA	sp|Q6PCP7|GP156_MOUSE	45.499	822	369	17	1	767	1	798	3.19e-165	500
Mmel_00004883-RA	sp|Q32NT4|LRC58_XENLA	79.717	212	31	2	8	219	151	350	1.59e-114	333
Mmel_00004884-RA	sp|Q12841|FSTL1_HUMAN	79.394	165	29	1	9	173	149	308	2.68e-88	263
Mmel_00004885-RA	sp|Q58D84|FSTL1_BOVIN	71.25	80	19	1	3	82	56	131	7.3e-31	112
Mmel_00004886-RA	sp|P48306|NDUB4_CHICK	73.276	116	31	0	1	116	1	116	8.24e-57	176
Mmel_00004887-RA	sp|Q93099|HGD_HUMAN	82.46	439	77	0	1	439	1	439	0	790
Mmel_00004888-RA	sp|Q32LJ6|RABL3_BOVIN	93.249	237	15	1	1	237	1	236	1.32e-163	454
Mmel_00004889-RA	sp|P29083|T2EA_HUMAN	77.211	294	64	2	12	305	149	439	2.91e-143	413
Mmel_00004892-RA	sp|Q9Y2K9|STB5L_HUMAN	89.172	157	17	0	1	157	1017	1173	4.57e-94	300
Mmel_00004891-RA	sp|Q9Y2K9|STB5L_HUMAN	84.545	220	34	0	1	220	485	704	2.55e-129	395
Mmel_00004890-RA	sp|Q9Y2K9|STB5L_HUMAN	91.463	246	21	0	30	275	222	467	4.81e-166	493
Mmel_00004893-RA	sp|O75417|DPOLQ_HUMAN	62.747	1063	362	8	7	1054	61	1104	0	1295
Mmel_00004896-RA	sp|Q2NKJ3|CTC1_HUMAN	35.628	1235	667	32	1	1193	67	1215	0	572
Mmel_00004898-RA	sp|Q5BIM1|TRI45_BOVIN	71.318	129	36	1	2	130	453	580	3.68e-56	186
Mmel_00004895-RA	sp|P50555|TNR1A_PIG	37.209	387	172	15	69	389	66	447	1.94e-56	195
Mmel_00004894-RA	sp|Q5ZIA0|MET16_CHICK	86	400	55	1	1	400	160	558	0	695
Mmel_00004897-RA	sp|Q7Z7D3|VTCN1_HUMAN	59.33	209	85	0	2	210	33	241	3.78e-93	278
Mmel_00004899-RA	sp|Q2T9X8|SPICE_BOVIN	45.833	240	111	4	9	241	299	526	4.83e-40	156
Mmel_00004900-RA	sp|Q2T9X8|SPICE_BOVIN	48.366	306	135	9	1	291	1	298	1.82e-72	241
Mmel_00004901-RA	sp|Q9NXL6|SIDT1_HUMAN	79.26	757	132	4	5	738	73	827	0	1192
Mmel_00004903-RA	sp|Q5RF28|NAA50_PONAB	97.024	168	4	1	12	179	3	169	2.07e-118	335
Mmel_00004902-RA	sp|Q68DE3|USF3_HUMAN	75.915	1229	267	14	148	1357	1027	2245	0	1741
Mmel_00004904-RA	sp|Q90647|VATA_CHICK	94.489	617	9	2	1	592	1	617	0	1189
Mmel_00004906-RA	sp|Q5ZL95|TET5C_CHICK	94.373	391	21	1	16	406	1	390	0	764
Mmel_00004905-RA	sp|Q9UNI6|DUS12_HUMAN	73.913	115	30	0	18	132	225	339	2.32e-58	186
Mmel_00004907-RA	sp|Q9NXN4|GDAP2_HUMAN	85.542	498	68	3	1	495	1	497	0	889
Mmel_00004908-RA	sp|Q9UNX4|WDR3_HUMAN	77.413	943	207	3	1	938	1	942	0	1488
Mmel_00004909-RA	sp|Q6Q759|SPG17_HUMAN	42.797	1437	634	32	656	1934	768	2174	0	954
Mmel_00004911-RA	sp|O70306|TBX15_MOUSE	87.19	242	31	0	142	383	361	602	8.98e-145	426
Mmel_00004912-RA	sp|Q96SF7|TBX15_HUMAN	81.07	243	5	1	26	268	140	341	1.21e-136	400
Mmel_00004913-RA	sp|Q3T099|SYWM_BOVIN	70.062	324	97	0	5	328	36	359	4.28e-172	484
Mmel_00004914-RA	sp|Q3ZBW2|HAOX2_BOVIN	63.487	304	109	1	2	305	52	353	2.1e-138	398
Mmel_00004915-RA	sp|Q5IFP1|3BHS_CANLF	56.417	374	161	2	3	376	1	372	2.03e-147	424
Mmel_00004916-RA	sp|O60476|MA1A2_HUMAN	90.476	231	22	0	1	231	411	641	3e-154	445
Mmel_00004917-RA	sp|P39098|MA1A2_MOUSE	90.323	62	6	0	1	62	223	284	1.5e-33	122
Mmel_00004918-RA	sp|P42081|CD86_HUMAN	36.187	257	159	5	37	292	13	265	5.03e-43	154
Mmel_00004921-RA	sp|Q862Z5|CYTB_MACFU	69.474	95	29	0	1	95	4	98	2.41e-45	144
Mmel_00004920-RA	sp|O62714|CASR_PIG	91.753	291	24	0	1	291	460	750	0	537
Mmel_00004919-RA	sp|O62714|CASR_PIG	82.46	496	40	4	13	506	9	459	0	822
Mmel_00004922-RA	sp|B5FX56|CCD58_TAEGU	94.531	128	7	0	1	128	17	144	2.51e-85	254
Mmel_00004926-RA	sp|Q92075|SCNNA_CHICK	85.086	637	79	5	1	635	15	637	0	1124
Mmel_00004925-RA	sp|Q9UH90|FBX40_HUMAN	64.489	704	218	6	2	677	3	702	0	911
Mmel_00004923-RA	sp|Q5R504|F162A_PONAB	50.413	121	60	0	1	121	28	148	6.57e-40	133
Mmel_00004924-RA	sp|Q5ZML1|IMA5_CHICK	97.375	381	10	0	1	381	1	381	0	767
Mmel_00004927-RA	sp|Q63666|VAMP1_RAT	90.476	63	6	0	22	84	44	106	1.5e-34	118
Mmel_00004928-RA	sp|Q15021|CND1_HUMAN	60.586	1332	474	13	8	1318	88	1389	0	1566
Mmel_00004931-RA	sp|O57479|G3P_COLLI	99.659	293	1	0	1	293	41	333	0	606
Mmel_00004937-RA	sp|Q149R9|LPAR5_MOUSE	50.136	367	163	4	1	347	1	367	1.7e-104	315
Mmel_00004935-RA	sp|Q6PDQ2|CHD4_MOUSE	90.632	1868	147	12	1	1853	1	1855	0	3097
Mmel_00004933-RA	sp|Q0D2I5|IFFO1_HUMAN	89.179	268	27	2	33	300	259	524	7.97e-171	488
Mmel_00004934-RA	sp|Q922K7|NOP2_MOUSE	69.275	524	131	8	61	564	117	630	0	719
Mmel_00004941-RA	sp|Q5R762|CSN7A_PONAB	91.327	196	17	0	21	216	80	275	2.55e-121	348
Mmel_00004940-RA	sp|Q8TF68|ZN384_HUMAN	75.217	230	34	4	1	209	1	228	2.17e-110	330
Mmel_00004938-RA	sp|Q5ZKY4|ING4_CHICK	100	236	0	0	9	244	14	249	1.5e-178	493
Mmel_00004944-RA	sp|Q16538|GP162_HUMAN	80.798	401	69	4	2	394	5	405	0	604
Mmel_00004943-RA	sp|Q9XS78|CD4_DELLE	26.343	391	225	17	40	401	94	450	2.08e-22	102
Mmel_00004945-RA	sp|Q8IVL6|P3H3_HUMAN	59.656	523	200	4	10	521	166	688	0	617
Mmel_00004946-RA	sp|P52287|GBB3_RAT	92.353	340	26	0	1	340	1	340	0	668
Mmel_00004942-RA	sp|Q99KX1|MLF2_MOUSE	83.628	226	33	3	1	222	22	247	2.3e-134	380
Mmel_00004962-RA	sp|P46058|EDSP_CYNPY	48.555	173	87	1	18	190	1	171	3.39e-52	173
Mmel_00004951-RA	sp|P29350|PTN6_HUMAN	79.836	610	104	6	1	606	1	595	0	1013
Mmel_00004955-RA	sp|Q69DK8|C1S_PIG	54.665	686	277	9	1	657	1	681	0	777
Mmel_00004948-RA	sp|P56399|UBP5_MOUSE	88.166	769	67	3	1	760	47	800	0	1385
Mmel_00004953-RA	sp|O35130|NEP1_MOUSE	88.079	151	18	0	1	151	94	244	1.16e-99	289
Mmel_00004959-RA	sp|Q99JH7|CSTN3_MOUSE	78.571	532	98	6	334	865	441	956	0	848
Mmel_00004961-RA	sp|Q5ZMQ9|PEX5_CHICK	87.037	594	52	1	7	575	51	644	0	1046
Mmel_00004949-RA	sp|O57391|ENOG_CHICK	98.876	356	4	0	355	710	1	356	0	725
Mmel_00004956-RA	sp|Q8CG16|C1RA_MOUSE	59.091	110	43	1	1	110	592	699	1.39e-41	148
Mmel_00004950-RA	sp|P54258|ATN1_RAT	91.633	251	19	2	23	272	934	1183	7.35e-127	391
Mmel_00004952-RA	sp|Q5ZMN3|PHB2_CHICK	78.182	165	2	1	3	167	159	289	1.07e-77	236
Mmel_00004958-RA	sp|Q5RBM7|RET5_PONAB	62.185	119	45	0	1	119	17	135	8.81e-53	165
Mmel_00004954-RA	sp|Q91V01|MBOA5_MOUSE	74.312	436	112	0	4	439	52	487	0	707
Mmel_00004957-RA	sp|Q8CG16|C1RA_MOUSE	61.893	412	154	2	8	418	8	417	0	545
Mmel_00004960-RA	sp|Q9BSK2|S2533_HUMAN	61.589	302	114	2	10	310	15	315	3.47e-134	386
Mmel_00013597-RA	sp|P52746|ZN142_HUMAN	53.134	1436	478	29	1	1366	210	1520	0	1419
Mmel_00013592-RA	sp|P17178|CP27A_RAT	58.228	158	62	1	117	270	342	499	2.76e-59	200
Mmel_00013595-RA	sp|Q69ZM6|STK36_MOUSE	48.564	1149	548	15	3	1134	29	1151	0	900
Mmel_00013596-RA	sp|Q7ZTL7|BCS1_XENLA	78.605	430	67	1	1	430	10	414	0	677
Mmel_00013594-RA	sp|Q80UG8|TTLL4_MOUSE	52.265	905	328	16	151	968	210	1097	0	855
Mmel_00013417-RA	sp|Q8NCP5|ZBT44_HUMAN	93.097	565	39	0	1	565	1	565	0	1088
Mmel_00013983-RA	sp|Q04799|FMO5_RABIT	70.957	303	87	1	36	337	117	419	2.28e-159	459
Mmel_00013984-RA	sp|O43741|AAKB2_HUMAN	82.243	107	19	0	1	107	1	107	4.28e-59	185
Mmel_00013986-RA	sp|Q80YT7|MYOME_MOUSE	33.525	522	246	15	60	512	1729	2218	1.43e-47	181
Mmel_00013987-RA	sp|Q5VU43|MYOME_HUMAN	55.629	755	227	9	62	765	236	933	0	717
Mmel_00013988-RA	sp|Q5VU43|MYOME_HUMAN	51.163	129	56	2	133	254	76	204	7.54e-23	101
Mmel_00014643-RA	sp|P11277|SPTB1_HUMAN	55.067	819	270	5	2	725	1261	2076	0	857
Mmel_00014499-RA	sp|Q11130|FUT7_HUMAN	53.535	297	135	3	78	372	47	342	6.2e-116	343
Mmel_00014500-RA	sp|A7Y7W2|PO5F3_CHICK	94.064	219	13	0	28	246	171	389	6.08e-152	431
Mmel_00014026-RA	sp|Q01812|GRIK4_RAT	71.493	221	17	1	1	221	681	855	5.62e-99	311
Mmel_00014027-RA	sp|Q5IS46|GRIK4_PANTR	95.238	63	3	0	1	63	430	492	5.27e-35	129
Mmel_00014476-RA	sp|Q5ZIB8|PIRK5_CHICK	89.109	101	11	0	1	101	781	881	7.03e-55	185
Mmel_00012175-RA	sp|Q92551|IP6K1_HUMAN	83.258	442	65	2	1	434	1	441	0	756
Mmel_00012176-RA	sp|Q5XPI4|RN123_HUMAN	81.116	1165	214	4	1	1163	1	1161	0	1954
Mmel_00012179-RA	sp|P34743|BTG1_CHICK	71.277	94	23	1	1	90	76	169	7.18e-41	135
Mmel_00012185-RA	sp|Q1T7B7|CENPP_CHICK	64.021	189	68	0	1	189	1	189	3.82e-83	250
Mmel_00012182-RA	sp|O94769|ECM2_HUMAN	60.883	634	201	7	4	604	80	699	0	739
Mmel_00012183-RA	sp|Q3ZBN5|ASPN_BOVIN	77.358	371	83	1	1	371	1	370	0	594
Mmel_00012180-RA	sp|Q9H8X2|IPPK_HUMAN	65.923	493	86	3	3	441	27	491	0	642
Mmel_00012177-RA	sp|Q5XIH2|SHSA5_RAT	66.957	115	36	1	1	115	3	115	2.44e-28	103
Mmel_00012181-RA	sp|Q1T7B7|CENPP_CHICK	71.277	94	27	0	1	94	191	284	1.58e-44	148
Mmel_00012184-RA	sp|Q76FK4|NOL8_HUMAN	36.372	1130	579	36	1	1062	1	1058	2.97e-151	484
Mmel_00012186-RA	sp|Q9DE65|MIME_COTJA	87.713	293	34	1	1	291	1	293	1.46e-180	501
Mmel_00012178-RA	sp|Q8BMG1|ATRIP_MOUSE	44.944	801	376	21	1	772	1	765	4.67e-175	527
Mmel_00013301-RA	sp|Q5SWD9|TSR1_MOUSE	72.833	600	150	6	15	611	182	771	0	883
Mmel_00013300-RA	sp|Q91VA6|PDIP2_MOUSE	88.746	311	12	1	33	343	81	368	0	571
Mmel_00013302-RA	sp|P61406|EST1A_MOUSE	43.125	160	75	4	4	161	31	176	3.34e-26	108
Mmel_00014894-RA	sp|P54802|ANAG_HUMAN	64.691	388	135	2	1	386	349	736	0	526
Mmel_00002559-RA	sp|Q9QXE7|TBL1X_MOUSE	97.797	227	5	0	2	228	301	527	3.19e-168	476
Mmel_00002558-RA	sp|Q9QXE7|TBL1X_MOUSE	92.657	286	17	1	32	313	19	304	8.92e-178	505
Mmel_00002561-RA	sp|P51810|GP143_HUMAN	62.308	390	139	4	1	386	1	386	5.45e-168	478
Mmel_00002564-RA	sp|H7C241|CLD34_HUMAN	42	200	113	2	6	205	6	202	1.68e-45	153
Mmel_00002562-RA	sp|Q09JY9|SHRM2_XENTR	44.269	951	436	30	1	914	158	1051	0	603
Mmel_00002563-RA	sp|Q13796|SHRM2_HUMAN	71.14	544	144	3	141	678	1080	1616	0	747
Mmel_00002565-RA	sp|Q9ULE0|WWC3_HUMAN	79.178	1095	209	5	105	1183	1	1092	0	1618
Mmel_00002566-RA	sp|P51793|CLCN4_HUMAN	97.078	616	18	0	208	823	145	760	0	1236
Mmel_00002568-RA	sp|P82458|TRI18_RAT	96.364	220	8	0	1	220	1	220	1.23e-155	449
Mmel_00002567-RA	sp|O15344|TRI18_HUMAN	95.285	403	19	0	2	404	264	666	0	816
Mmel_00002569-RA	sp|O54834|RHG06_MOUSE	73.092	747	178	6	16	747	249	987	0	990
Mmel_00002572-RA	sp|Q8N5Y2|MS3L1_HUMAN	83.473	478	79	0	6	483	35	512	0	796
Mmel_00002573-RA	sp|Q14CM0|FRPD4_HUMAN	75.402	1183	254	5	5	1150	139	1321	0	1796
Mmel_00002574-RA	sp|Q5ZI49|PRPS2_CHICK	97.535	284	7	0	1	284	42	325	0	576
Mmel_00002575-RA	sp|P20065|TYB4_MOUSE	95.455	44	2	0	1	44	7	50	4e-22	85.9
Mmel_00002581-RA	sp|O75665|OFD1_HUMAN	49.278	1039	455	19	7	1028	12	995	0	800
Mmel_00002576-RA	sp|Q8IUX8|EGFL6_HUMAN	57.905	525	188	2	22	514	23	546	0	642
Mmel_00002578-RA	sp|Q9GMV6|TEANC_MACFA	52.473	364	158	3	1	363	1	350	1.52e-124	365
Mmel_00002579-RA	sp|P51151|RAB9A_HUMAN	94.527	201	11	0	1	201	1	201	1.11e-144	403
Mmel_00002580-RA	sp|Q9CQP2|TPPC2_MOUSE	79.167	168	7	1	1	168	1	140	1.12e-92	268
Mmel_00002582-RA	sp|P35803|GPM6B_MOUSE	94.403	268	15	0	12	279	61	328	0	518
Mmel_00002583-RA	sp|Q9NWZ8|GEMI8_HUMAN	41.844	141	75	3	19	159	12	145	2.82e-24	98.6
Mmel_00002584-RA	sp|Q7TNC8|GLRA2_MOUSE	91.262	103	3	1	95	197	69	165	1.33e-59	197
Mmel_00002586-RA	sp|Q8NHP6|MSPD2_HUMAN	73.01	289	76	1	32	318	7	295	7.49e-161	461
Mmel_00002587-RA	sp|Q8NHP6|MSPD2_HUMAN	65.258	213	59	2	9	218	318	518	5.95e-91	279
Mmel_00002588-RA	sp|Q96DX5|ASB9_HUMAN	67.647	238	62	1	1	223	30	267	7.56e-107	312
Mmel_00002590-RA	sp|P37287|PIGA_HUMAN	85.169	236	35	0	11	246	238	473	1.53e-149	429
Mmel_00002591-RA	sp|O43915|VEGFD_HUMAN	65.938	320	106	2	10	326	24	343	9.62e-150	427
Mmel_00002589-RA	sp|Q3SZE4|ASB11_BOVIN	76.173	277	66	0	3	279	26	302	2.61e-151	428
Mmel_00002597-RA	sp|Q15696|U2AFM_HUMAN	72.683	410	104	4	110	517	14	417	0	533
Mmel_00002593-RA	sp|Q56NL1|ACE2_PAGLA	67.284	810	251	5	7	811	5	805	0	1167
Mmel_00002596-RA	sp|Q0VCT4|TMM27_BOVIN	61.261	222	82	3	5	223	2	222	2.25e-103	300
Mmel_00002598-RA	sp|Q9DB50|AP1S2_MOUSE	100	135	0	0	2	136	8	142	1.65e-95	275
Mmel_00002599-RA	sp|P30550|GRPR_HUMAN	84.49	245	37	1	3	247	138	381	2.28e-153	434
Mmel_00002601-RA	sp|Q9D5V6|SYAP1_MOUSE	79.935	309	47	2	8	315	70	364	1.59e-173	488
Mmel_00002600-RA	sp|Q5F3Z1|PYRG2_CHICK	92.055	365	7	1	1	343	1	365	0	686
Mmel_00002602-RA	sp|Q9NUQ3|TXLNG_HUMAN	78.586	495	91	7	1	486	40	528	0	706
Mmel_00002604-RA	sp|Q9I8G9|RBBP7_CHICK	86.988	415	40	1	5	405	9	423	0	746
Mmel_00002605-RA	sp|Q8NFH8|REPS2_HUMAN	65.16	376	126	4	75	449	89	460	8.33e-155	457
Mmel_00002606-RA	sp|Q8NFH8|REPS2_HUMAN	72.897	107	29	0	2	108	554	660	1.42e-40	144
Mmel_00002607-RA	sp|Q6T4R5|NHS_HUMAN	72.894	1472	373	13	3	1458	190	1651	0	1947
Mmel_00002608-RA	sp|Q8NDZ0|BEND2_HUMAN	45.395	304	149	6	342	633	470	768	3.81e-71	249
Mmel_00002609-RA	sp|Q9QVY8|RAI2_MOUSE	61.486	148	45	3	77	223	393	529	1.24e-48	169
Mmel_00002611-RA	sp|Q9UQR0|SCML2_HUMAN	81.517	211	39	0	2	212	33	243	6e-129	382
Mmel_00002610-RA	sp|Q9UQR0|SCML2_HUMAN	52.371	464	188	10	1	462	265	697	7.46e-144	430
Mmel_00002612-RA	sp|Q3UTQ8|CDKL5_MOUSE	75.787	921	160	12	128	1031	30	904	0	1357
Mmel_00002615-RA	sp|O14829|PPE1_HUMAN	52.868	645	235	9	8	586	1	642	0	662
Mmel_00002613-RA	sp|O15537|XLRS1_HUMAN	87.5	96	12	0	51	146	129	224	2.86e-59	186
Mmel_00002617-RA	sp|Q8CJ11|AGRG2_RAT	68.445	656	199	4	11	663	363	1013	0	869
Mmel_00002616-RA	sp|Q8BWJ3|KPB2_MOUSE	79.256	1210	219	4	40	1218	27	1235	0	1977
Mmel_00002619-RA	sp|P35486|ODPA_MOUSE	84.759	374	54	1	3	376	20	390	0	682
Mmel_00002620-RA	sp|Q6ZN16|M3K15_HUMAN	78.666	1214	210	6	2	1187	121	1313	0	1983
Mmel_00002623-RA	sp|A2AJT9|BCLA3_HUMAN	53.333	705	317	9	44	746	15	709	0	691
Mmel_00002621-RA	sp|Q96B97|SH3K1_HUMAN	73.039	204	53	2	4	206	463	665	1.26e-79	253
Mmel_00002622-RA	sp|Q96B97|SH3K1_HUMAN	81.928	166	27	2	44	207	297	461	3.57e-67	221
Mmel_00002625-RA	sp|Q5R7F9|MA7D2_PONAB	55.686	765	255	11	2	728	45	763	0	686
Mmel_00002626-RA	sp|Q6VV72|IF1A_RAT	100	77	0	0	17	93	68	144	1.63e-49	155
Mmel_00002628-RA	sp|P18654|KS6A3_MOUSE	90.813	283	20	1	75	357	319	595	0	533
Mmel_00002627-RA	sp|P18654|KS6A3_MOUSE	96.341	82	3	0	1	82	659	740	1.51e-48	166
Mmel_00002629-RA	sp|P18654|KS6A3_MOUSE	98.936	94	1	0	24	117	43	136	1.33e-56	189
Mmel_00002630-RA	sp|Q80YA9|CNKR2_MOUSE	88.018	217	26	0	1	217	320	536	1.14e-111	346
Mmel_00002631-RA	sp|Q8WXI2|CNKR2_HUMAN	77.206	136	31	0	1	136	899	1034	3.39e-66	219
Mmel_00002632-RA	sp|Q8N239|KLH34_HUMAN	51.905	630	256	6	62	644	1	630	0	635
Mmel_00002634-RA	sp|O54862|MBTP2_CRIGR	65.61	410	117	3	3	388	14	423	0	553
Mmel_00002633-RA	sp|Q5RB90|SMPX_PONAB	80.519	77	12	2	8	84	13	86	1.39e-34	115
Mmel_00002636-RA	sp|P70669|PHEX_MOUSE	80.172	116	23	0	8	123	634	749	6.31e-63	207
Mmel_00002635-RA	sp|P52788|SPSY_HUMAN	77.5	280	31	1	1	248	35	314	5.25e-143	407
Mmel_00002638-RA	sp|Q96NR3|PTHD1_HUMAN	95.281	551	26	0	17	567	338	888	0	1048
Mmel_00002637-RA	sp|Q96NR3|PTHD1_HUMAN	90.455	220	21	0	2	221	118	337	1.04e-143	427
Mmel_00002641-RA	sp|Q8AXL1|SAT1_CHICK	79.412	170	7	1	1	170	30	171	2.69e-92	268
Mmel_00002639-RA	sp|O08807|PRDX4_MOUSE	92.632	190	14	0	1	190	85	274	2.82e-133	377
Mmel_00002640-RA	sp|Q3SWX2|ACOT9_BOVIN	71.348	356	99	1	26	381	6	358	0	530
Mmel_00002646-RA	sp|Q5ZMS3|IF2G_CHICK	99.777	449	1	0	1	449	24	472	0	911
Mmel_00002644-RA	sp|D3ZA50|KLH15_RAT	95.126	595	29	0	14	608	4	598	0	1202
Mmel_00002643-RA	sp|Q148H0|MIC26_BOVIN	51.244	201	93	1	53	253	3	198	7.68e-72	221
Mmel_00002648-RA	sp|O62836|ZFX_BOVIN	90.262	801	70	3	1	794	1	800	0	1489
Mmel_00002651-RA	sp|Q922H2|PDK3_MOUSE	94.07	371	22	0	8	378	36	406	0	732
Mmel_00002652-RA	sp|Q9QZC4|PCY1B_RAT	91.212	330	16	2	39	355	40	369	0	548
Mmel_00002653-RA	sp|P09884|DPOLA_HUMAN	68.956	1034	287	6	188	1220	8	1008	0	1417
Mmel_00002654-RA	sp|O89042|DPOLA_RAT	87.429	175	22	0	24	198	1001	1175	2.2e-95	306
Mmel_00002655-RA	sp|Q7YQL9|IRPL1_PONPY	97.368	342	9	0	1	342	355	696	0	703
Mmel_00002656-RA	sp|P79386|NR0B1_PIG	61.905	273	94	4	4	266	199	471	1.05e-103	312
Mmel_00002657-RA	sp|Q9HAI6|CX021_HUMAN	51.803	305	127	10	1	290	1	300	9.39e-90	272
Mmel_00002659-RA	sp|Q64516|GLPK_MOUSE	68.665	517	125	7	4	509	42	532	0	671
Mmel_00002660-RA	sp|Q8N5C8|TAB3_HUMAN	81.742	712	81	6	1	671	1	704	0	1049
Mmel_00002662-RA	sp|P11530|DMD_RAT	96.117	309	12	0	3	311	3355	3663	0	622
Mmel_00002664-RA	sp|P11533|DMD_CHICK	89.744	117	12	0	1	117	1561	1677	3.76e-63	210
Mmel_00002663-RA	sp|P11533|DMD_CHICK	88.519	270	31	0	1	270	1721	1990	6.1e-156	486
Mmel_00002665-RA	sp|P11533|DMD_CHICK	80	175	35	0	1	175	882	1056	7.29e-90	290
Mmel_00002666-RA	sp|P11533|DMD_CHICK	92.199	282	22	0	1	282	515	796	2.21e-166	514
Mmel_00002668-RA	sp|Q9BQJ4|TMM47_HUMAN	95.536	112	3	1	12	123	72	181	2.88e-71	213
Mmel_00002671-RA	sp|Q5RCB6|TMG1_PONAB	63.393	224	73	2	44	264	1	218	3.34e-102	299
Mmel_00002669-RA	sp|Q6ZTR5|CFA47_HUMAN	60.784	102	39	1	2	102	3083	3184	4.88e-31	118
Mmel_00002670-RA	sp|Q6ZTR5|CFA47_HUMAN	39.357	249	148	2	3	249	2814	3061	4.43e-53	187
Mmel_00002672-RA	sp|Q6ZV70|LANC3_HUMAN	93.013	229	16	0	21	249	192	420	1.83e-159	451
Mmel_00002673-RA	sp|P51811|XK_HUMAN	63.977	347	98	1	30	349	82	428	5.97e-158	456
Mmel_00002674-RA	sp|P04839|CY24B_HUMAN	83.604	555	76	1	32	571	16	570	0	942
Mmel_00002675-RA	sp|Q8SPS9|DYLT3_CANLF	63.793	116	16	1	1	90	1	116	9.87e-46	145
Mmel_00002677-RA	sp|Q80T23|SYTL5_MOUSE	59.633	654	204	8	1	603	109	753	0	717
Mmel_00002676-RA	sp|Q812E4|SYTL5_RAT	64.706	68	22	1	1	68	39	104	1.5e-23	94.7
Mmel_00002678-RA	sp|P78539|SRPX_HUMAN	81.633	245	45	0	36	280	33	277	4.49e-148	429
Mmel_00002682-RA	sp|Q9YHY9|OTC_CHICK	84.488	303	37	1	1	293	33	335	0	521
Mmel_00002681-RA	sp|Q9R0X5|RPGR_MOUSE	56.618	272	79	2	35	267	83	354	3.33e-93	299
Mmel_00002684-RA	sp|P41732|TSN7_HUMAN	71.852	135	32	2	5	139	89	217	1.48e-62	198
Mmel_00002685-RA	sp|Q6P7D5|M1IP1_RAT	60.897	156	42	7	1	137	28	183	1.34e-50	162
Mmel_00002688-RA	sp|Q6W2J9|BCOR_HUMAN	70.31	1775	465	27	1	1740	1	1748	0	2373
Mmel_00014162-RA	sp|P22727|WNT6_MOUSE	61.278	266	55	2	21	238	99	364	3.91e-108	318
Mmel_00014161-RA	sp|P43446|WN10A_DANRE	81.699	153	28	0	1	153	290	442	2.07e-88	267
Mmel_00011385-RA	sp|Q5E9B3|PGTB2_BOVIN	90.606	330	31	0	1	330	2	331	0	635
Mmel_00011386-RA	sp|Q3SZB4|ACADM_BOVIN	85.472	413	57	1	46	458	11	420	0	751
Mmel_00011387-RA	sp|B0JZD0|CTL5_XENTR	83.024	701	113	2	5	700	13	712	0	1238
Mmel_00011391-RA	sp|Q08257|QOR_HUMAN	72.699	326	89	0	1	326	1	326	2e-177	500
Mmel_00011389-RA	sp|Q68G74|LHX8_HUMAN	97.549	204	5	0	20	223	131	334	1.28e-148	422
Mmel_00011390-RA	sp|Q6IPR3|TYW3_HUMAN	64.118	170	60	1	10	179	61	229	4.52e-75	229
Mmel_00011392-RA	sp|Q5RHP9|ERIC3_HUMAN	38.92	352	166	11	211	522	256	598	3.26e-44	178
Mmel_00011393-RA	sp|Q59H18|TNI3K_HUMAN	87.669	665	53	1	1	636	15	679	0	1213
Mmel_00011394-RA	sp|O14772|FPGT_HUMAN	62.913	515	187	3	57	568	90	603	0	662
Mmel_00009593-RA	sp|Q8WZ64|ARAP2_HUMAN	73.327	1091	257	6	1	1074	620	1693	0	1640
Mmel_00009595-RA	sp|O75882|ATRN_HUMAN	78.23	1130	237	3	42	1162	138	1267	0	1890
Mmel_00009596-RA	sp|O93512|GFRA4_CHICK	85.673	342	22	1	1	315	16	357	0	606
Mmel_00010145-RA	sp|Q9HAZ2|PRD16_HUMAN	73.372	1044	203	11	61	1031	191	1232	0	1390
Mmel_00010146-RA	sp|Q5PPS5|TTC34_XENLA	48.633	512	243	3	508	999	29	540	5.79e-165	498
Mmel_00010147-RA	sp|Q495T6|MMEL1_HUMAN	64.185	779	229	3	21	749	1	779	0	1052
Mmel_00010150-RA	sp|Q4R4U1|PANK4_MACFA	83.562	730	72	3	1	683	43	771	0	1265
Mmel_00010149-RA	sp|Q03062|HES5_RAT	57.225	173	55	4	1	161	1	166	2.46e-54	172
Mmel_00010153-RA	sp|O60683|PEX10_HUMAN	58.364	269	112	0	11	279	58	326	6.36e-111	326
Mmel_00010152-RA	sp|O75038|PLCH2_HUMAN	82.81	669	104	2	406	1074	304	961	0	1145
Mmel_00010151-RA	sp|Q90218|GLRK_ANAPL	87.097	372	48	0	1	372	1	372	0	679
Mmel_00010154-RA	sp|Q5ZHM5|RER1_CHICK	99.49	196	1	0	1	196	1	196	4.69e-146	406
Mmel_00010155-RA	sp|P49140|SKI_CHICK	90.361	415	30	3	25	435	342	750	0	627
Mmel_00010158-RA	sp|O14764|GBRD_HUMAN	85.092	436	64	1	17	451	17	452	0	730
Mmel_00010157-RA	sp|Q02956|KPCZ_MOUSE	61.702	94	36	0	1	94	1	94	1.79e-35	131
Mmel_00010156-RA	sp|P09217|KPCZ_RAT	79.21	481	15	2	13	408	112	592	0	762
Mmel_00010164-RA	sp|Q8C811|S35E2_MOUSE	87.107	318	40	1	7	324	10	326	0	548
Mmel_00010165-RA	sp|P24788|CD11B_MOUSE	84.218	754	103	4	10	747	1	754	0	1123
Mmel_00010162-RA	sp|P58058|NADK_MOUSE	82.974	417	65	2	31	446	27	438	0	687
Mmel_00010159-RA	sp|Q3UY96|CFA74_MOUSE	41.699	1566	676	27	49	1388	23	1577	0	1103
Mmel_00010160-RA	sp|Q9D702|TMM52_MOUSE	48.75	160	75	3	6	159	37	195	6.14e-36	127
Mmel_00010161-RA	sp|P79959|GBB1_XENLA	98.712	233	3	0	1	233	1	233	1.36e-171	480
Mmel_00012771-RA	sp|Q5RDS9|FGF13_PONAB	94.853	136	7	0	1	136	1	136	4.79e-85	253
Mmel_00012770-RA	sp|Q9ERW3|FGF13_RAT	99.099	111	1	0	1	111	135	245	4.14e-78	233
Mmel_00015095-RA	sp|Q29397|SV2A_BOVIN	84.545	110	16	1	1	109	521	630	1.09e-59	198
Mmel_00015180-RA	sp|O60481|ZIC3_HUMAN	76.433	157	2	1	1	157	287	408	1.05e-79	246
Mmel_00012671-RA	sp|Q5DTN8|JKIP3_MOUSE	75.586	811	83	5	1	696	1	811	0	1167
Mmel_00012670-RA	sp|Q6NY64|2ABD_DANRE	76.667	420	43	2	2	366	28	447	0	648
Mmel_00012672-RA	sp|O35098|DPYL4_MOUSE	82.5	200	33	1	62	259	373	572	4.25e-115	344
Mmel_00012674-RA	sp|Q6NUJ5|PWP2B_HUMAN	59.633	436	156	3	1	427	166	590	3.5e-163	474
Mmel_00012673-RA	sp|Q86UX6|ST32C_HUMAN	84.697	379	51	1	4	375	107	485	0	655
Mmel_00011487-RA	sp|Q1T7C0|CENPL_CHICK	77.431	288	65	0	1	288	57	344	2.01e-167	470
Mmel_00011485-RA	sp|P57771|RGS8_HUMAN	87.736	106	13	0	3	108	75	180	1.68e-65	198
Mmel_00011490-RA	sp|Q2KJH9|AL9A1_BOVIN	84.787	493	75	0	173	665	2	494	0	888
Mmel_00011493-RA	sp|Q9BZD4|NUF2_HUMAN	43.75	448	190	4	1	391	22	464	7.96e-114	343
Mmel_00011491-RA	sp|O14880|MGST3_HUMAN	72.464	138	38	0	1	138	1	138	4.95e-76	225
Mmel_00011486-RA	sp|Q6PI48|SYDM_HUMAN	66.497	591	170	1	1	563	44	634	0	839
Mmel_00011492-RA	sp|Q8N7C0|LRC52_HUMAN	48.969	194	98	1	6	199	8	200	6.81e-56	183
Mmel_00011489-RA	sp|Q9QYG8|UCK2_RAT	74.672	229	24	1	3	197	33	261	1.33e-115	332
Mmel_00011488-RA	sp|D3Z8N4|KLH20_RAT	93.056	576	7	2	43	611	59	608	0	1093
Mmel_00011494-RA	sp|P41778|PBX1_MOUSE	100	99	0	0	1	99	235	333	9.07e-67	209
Mmel_00012571-RA	sp|Q5ZID0|NMRL1_CHICK	80.982	163	31	0	1	163	15	177	8.68e-94	276
Mmel_00012566-RA	sp|Q9CZK6|ANKS3_MOUSE	60.092	654	186	11	38	623	1	647	0	711
Mmel_00012568-RA	sp|Q6AYJ5|CLUA1_RAT	53.846	130	57	2	1	129	275	402	7.37e-27	105
Mmel_00012567-RA	sp|Q8R3P7|CLUA1_MOUSE	83.75	160	26	0	21	180	6	165	2.52e-93	280
Mmel_00012570-RA	sp|Q99M87|DNJA3_MOUSE	80.059	341	64	1	11	351	114	450	0	585
Mmel_00012569-RA	sp|Q7RTR2|NLRC3_HUMAN	59.222	1003	364	5	2	959	63	1065	0	1162
Mmel_00014533-RA	sp|Q5XI42|AL3B1_RAT	62.092	153	57	1	9	161	317	468	2.03e-65	209
Mmel_00014534-RA	sp|Q5XI42|AL3B1_RAT	59.542	131	50	2	100	228	339	468	9.31e-46	161
Mmel_00015091-RA	sp|Q80XP9|WNK3_MOUSE	100	67	0	0	1	67	244	310	4.65e-41	145
Mmel_00014952-RA	sp|O77742|OMD_BOVIN	62.402	383	141	2	1	380	1	383	2.26e-169	484
Mmel_00015123-RA	sp|Q8CI15|SPHK1_MOUSE	52.92	274	110	2	1	274	92	346	3.57e-96	290
Mmel_00014651-RA	sp|Q61086|FZD3_MOUSE	96.335	382	14	0	1	382	199	580	0	770
Mmel_00013413-RA	sp|Q9H209|O10A4_HUMAN	53.878	245	113	0	1	245	60	304	8.22e-90	271
Mmel_00013416-RA	sp|Q9ET32|BGAT1_RAT	41	300	160	2	29	312	26	324	9.35e-85	262
Mmel_00013412-RA	sp|A6NL08|O6C75_HUMAN	50.667	75	37	0	2	76	3	77	4.52e-21	89.4
Mmel_00013415-RA	sp|Q17QH8|D39U1_BOVIN	66.8	250	72	2	10	259	56	294	9.81e-114	331
Mmel_00013414-RA	sp|Q8NGI6|OR4DA_HUMAN	62.857	70	26	0	13	82	231	300	1.52e-24	102
Mmel_00014609-RA	sp|O15218|GP182_HUMAN	62.842	366	122	4	2	362	12	368	1.19e-160	459
Mmel_00014610-RA	sp|P50170|RDH2_RAT	55.556	117	52	0	4	120	197	313	3.94e-43	146
Mmel_00014870-RA	sp|Q7ZW11|TM39B_DANRE	86.364	110	15	0	1	110	380	489	1.05e-55	182
Mmel_00014562-RA	sp|Q61555|FBN2_MOUSE	35.492	417	162	11	156	545	1359	1695	4.07e-48	184
Mmel_00013154-RA	sp|Q5F488|MAGI3_CHICK	88.802	1018	73	6	4	983	99	1113	0	1815
Mmel_00013155-RA	sp|O94898|LRIG2_HUMAN	77.632	988	179	7	2	953	79	1060	0	1528
Mmel_00015099-RA	sp|P19336|CYR61_CHICK	95.971	273	11	0	26	298	24	296	0	507
Mmel_00015195-RA	sp|P09642|TBA3_CHICK	97.807	228	5	0	1	228	94	321	3.41e-168	469
Mmel_00013747-RA	sp|O95983|MBD3_HUMAN	95.767	189	8	0	3	191	38	226	7.59e-134	379
Mmel_00013746-RA	sp|P98180|TFE2_MESAU	50.836	299	88	8	7	304	409	649	5.9e-78	252
Mmel_00000002-RA	sp|Q9BXT6|M10L1_HUMAN	55.963	1199	439	12	1	1158	53	1203	0	1295
Mmel_00000001-RA	sp|Q15049|MLC1_HUMAN	73.333	375	99	1	4	378	3	376	0	529
Mmel_00000003-RA	sp|P60571|PANX2_RAT	72.033	615	157	8	6	615	70	674	0	900
Mmel_00000005-RA	sp|Q9BVL4|SELO_HUMAN	72.211	493	128	1	18	510	182	665	0	766
Mmel_00000004-RA	sp|Q99JY4|TRABD_MOUSE	81.493	335	62	0	16	350	37	371	0	549
Mmel_00000006-RA	sp|G5E8P0|GCP6_MOUSE	58.778	1800	568	21	29	1710	1	1744	0	2028
Mmel_00000007-RA	sp|Q969S8|HDA10_HUMAN	48.696	690	305	10	9	677	2	663	0	642
Mmel_00000010-RA	sp|Q9WUI1|MK11_MOUSE	77.215	316	46	2	42	331	35	350	1.76e-179	504
Mmel_00000009-RA	sp|P53778|MK12_HUMAN	63.777	323	42	3	7	254	43	365	3.78e-136	401
Mmel_00000012-RA	sp|O15031|PLXB2_HUMAN	54.068	590	244	6	55	635	21	592	0	645
Mmel_00000011-RA	sp|B2RXS4|PLXB2_MOUSE	76.373	965	198	6	45	998	897	1842	0	1492
Mmel_00000013-RA	sp|Q2TB10|ZN800_HUMAN	80.094	638	102	4	20	655	50	664	0	1016
Mmel_00000014-RA	sp|O00222|GRM8_HUMAN	96.104	77	3	0	1	77	168	244	1.65e-45	158
Mmel_00000015-RA	sp|O00222|GRM8_HUMAN	82.635	167	17	1	17	183	242	396	1.43e-90	288
Mmel_00000016-RA	sp|P70579|GRM8_RAT	92.381	315	24	0	1	315	502	816	0	623
Mmel_00000018-RA	sp|O15354|GPR37_HUMAN	92.279	272	21	0	16	287	342	613	3.92e-174	497
Mmel_00000017-RA	sp|P62597|POTE1_CHICK	78.974	780	158	4	16	791	1	778	0	1291
Mmel_00000019-RA	sp|Q6NZW8|AR8BA_DANRE	79.221	154	23	1	25	169	17	170	1.87e-86	256
Mmel_00000020-RA	sp|P38567|HYALP_HUMAN	55.507	454	198	3	21	474	20	469	0	542
Mmel_00000023-RA	sp|O00401|WASL_HUMAN	93.22	236	16	0	1	236	41	276	2.86e-157	452
Mmel_00000022-RA	sp|A3QVN3|HYAL1_CERCE	61.29	434	168	0	20	453	6	439	0	587
Mmel_00000025-RA	sp|E1BTG2|LMOD2_CHICK	87.293	362	33	2	1	349	1	362	0	582
Mmel_00000026-RA	sp|Q8VHS6|ASB15_MOUSE	53.676	136	46	3	14	133	317	451	6.29e-33	128
Mmel_00000030-RA	sp|O54715|VAS1_RAT	42.798	243	126	7	7	247	230	461	2.4e-55	187
Mmel_00000029-RA	sp|Q8NA54|IQUB_HUMAN	58.459	532	220	1	86	617	232	762	0	638
Mmel_00000031-RA	sp|Q9BZW2|S13A1_HUMAN	55.672	573	163	8	1	499	34	589	0	598
Mmel_00000028-RA	sp|P23935|NDUA5_BOVIN	76.724	116	27	0	19	134	1	116	1.44e-62	189
Mmel_00000032-RA	sp|Q8BYR5|CAPS2_MOUSE	91.837	147	12	0	13	159	266	412	1.29e-88	284
Mmel_00000034-RA	sp|A0PJY2|FEZF1_HUMAN	70.506	356	17	2	27	332	117	434	1.1e-171	489
Mmel_00000033-RA	sp|Q8BYR5|CAPS2_MOUSE	88.608	79	9	0	1	79	1217	1295	5.51e-42	147
Mmel_00000035-RA	sp|A8E657|AASS_BOVIN	72.057	909	206	2	55	916	18	925	0	1363
Mmel_00000036-RA	sp|P23471|PTPRZ_HUMAN	53.537	1640	675	27	4	1592	42	1645	0	1476
Mmel_00000037-RA	sp|Q92520|FAM3C_HUMAN	92.925	212	15	0	64	275	16	227	1.21e-149	420
Mmel_00000039-RA	sp|A4D0V7|CPED1_HUMAN	41.538	325	137	3	1	272	361	685	5.03e-74	247
Mmel_00000038-RA	sp|Q9UBV4|WNT16_HUMAN	85.625	160	23	0	29	188	206	365	7.05e-100	295
Mmel_00000041-RA	sp|Q5ZK36|ING3_CHICK	97.761	402	8	1	1	401	16	417	0	815
Mmel_00000042-RA	sp|Q5ZIF5|TSN12_CHICK	95.135	185	9	0	55	239	121	305	2.59e-133	380
Mmel_00000043-RA	sp|Q8HYZ1|KCND2_MUSPF	94.086	372	22	0	1	372	1	372	0	741
Mmel_00000045-RA	sp|Q9UPS8|ANR26_HUMAN	49.441	716	324	4	1295	2009	640	1318	2.06e-178	598
Mmel_00000047-RA	sp|Q5RCP3|LSM8_PONAB	87.85	107	2	1	1	107	1	96	5.02e-59	179
Mmel_00000048-RA	sp|Q2QLA2|CTTB2_HORSE	74.381	1534	372	8	2	1526	29	1550	0	2315
Mmel_00000050-RA	sp|A4D7T3|ASZ1_MACEU	56.808	426	178	2	7	426	40	465	3.05e-169	491
Mmel_00000049-RA	sp|Q2QLA3|CFTR_HORSE	68.284	1422	300	18	3	1282	56	1468	0	1863
Mmel_00000051-RA	sp|Q2QL96|WNT2_MONDO	92.278	259	20	0	1	259	102	360	2.58e-180	502
Mmel_00000054-RA	sp|P28497|CAZA2_CHICK	99.27	274	2	0	11	284	13	286	0	572
Mmel_00000052-RA	sp|Q1RLU8|ST7_DANRE	95.122	82	4	0	21	102	432	513	1.59e-46	158
Mmel_00000053-RA	sp|A0M8U1|ST7_CHICK	71.835	316	25	4	11	262	84	399	8.15e-132	387
Mmel_00000055-RA	sp|Q2IBG7|MET_EULMM	62.529	435	120	4	93	485	656	1089	1.8e-168	520
Mmel_00000056-RA	sp|P35431|CAV1_CHICK	97.368	114	3	0	10	123	65	178	7.81e-79	233
Mmel_00000057-RA	sp|Q90YH9|TES_CHICK	85.301	415	59	2	17	430	9	422	0	758
Mmel_00000058-RA	sp|Q5XFQ6|TFEC_CHICK	98.131	214	4	0	1	214	164	377	1.26e-153	433
Mmel_00000059-RA	sp|Q9P1T7|MDFIC_HUMAN	97.561	82	2	0	259	340	165	246	9.17e-51	177
Mmel_00000060-RA	sp|Q8MJ99|FOXP2_GORGO	86.411	574	10	3	1	506	93	666	0	988
Mmel_00000062-RA	sp|Q16821|PPR3A_HUMAN	37.5	488	253	12	426	893	666	1121	3.02e-71	259
Mmel_00000061-RA	sp|Q7ZYQ0|FXI1E_XENLA	53.704	108	47	2	106	210	110	217	9.78e-31	119
Mmel_00000065-RA	sp|P60895|GPR85_RAT	98.394	249	4	0	7	255	117	365	0	510
Mmel_00000066-RA	sp|Q5ZJ87|SAMTR_CHICK	96.591	352	12	0	27	378	56	407	0	717
Mmel_00000067-RA	sp|A0JNG0|TM168_BOVIN	85.337	682	97	1	12	693	1	679	0	1236
Mmel_00000068-RA	sp|Q8N8F7|LSME1_HUMAN	55.357	112	43	2	16	125	16	122	1.3e-33	117
Mmel_00000069-RA	sp|O00458|IFRD1_HUMAN	84.539	401	61	1	1	400	51	451	0	722
Mmel_00000070-RA	sp|Q9NRM2|ZN277_HUMAN	76.923	416	95	1	5	419	34	449	0	681
Mmel_00000072-RA	sp|P59764|DOCK4_MOUSE	98.438	128	2	0	1	128	106	233	8.2e-82	264
Mmel_00000071-RA	sp|Q8N1I0|DOCK4_HUMAN	94.565	92	5	0	1	92	14	105	1.51e-57	193
Mmel_00000073-RA	sp|P59764|DOCK4_MOUSE	94.681	94	5	0	1	94	262	355	1.48e-58	196
Mmel_00000074-RA	sp|Q8N1I0|DOCK4_HUMAN	86.647	1655	121	8	1	1643	400	1966	0	2764
Mmel_00000076-RA	sp|Q5R482|LRRN3_PONAB	82.459	610	107	0	37	646	99	708	0	1033
Mmel_00000078-RA	sp|Q5ZHN5|THAP5_CHICK	73.438	384	91	5	6	378	29	412	0	548
Mmel_00000077-RA	sp|G3H0N9|DNJB9_CRIGR	76.303	211	43	2	1	204	1	211	2.66e-114	327
Mmel_00000081-RA	sp|Q9NP80|PLPL8_HUMAN	75	156	39	0	1	156	627	782	3.28e-84	265
Mmel_00000080-RA	sp|Q5XTS1|PLPL8_RABIT	54.984	642	231	15	2	616	19	629	0	641
Mmel_00000079-RA	sp|Q90352|AVT_CATCO	52.396	313	141	3	27	334	11	320	1.83e-107	325
Mmel_00000082-RA	sp|P35331|NRCAM_CHICK	86.421	1355	75	9	100	1416	1	1284	0	2340
Mmel_00000083-RA	sp|P14781|CNTN1_CHICK	94.022	552	28	1	17	563	3	554	0	1097
Mmel_00000084-RA	sp|P14781|CNTN1_CHICK	96.981	265	8	0	1	265	720	984	0	537
Mmel_00000085-RA	sp|Q6ZMN7|PZRN4_HUMAN	87.736	636	78	0	7	642	401	1036	0	1067
Mmel_00000086-RA	sp|Q5ZKI6|GXLT1_CHICK	92.47	332	25	0	1	332	101	432	0	633
Mmel_00000087-RA	sp|Q99LW6|YAF2_MOUSE	79.31	116	23	1	71	186	60	174	1.8e-49	163
Mmel_00000089-RA	sp|Q8NEY8|PPHLN_HUMAN	65.147	307	95	7	44	343	1	302	1.43e-108	327
Mmel_00000088-RA	sp|Q8TBF4|ZCRB1_HUMAN	70.507	217	27	2	9	188	1	217	4.89e-84	250
Mmel_00000090-RA	sp|Q96MT3|PRIC1_HUMAN	86.795	833	106	4	76	906	1	831	0	1404
Mmel_00000091-RA	sp|P59511|ATS20_MOUSE	70.312	64	19	0	15	78	1814	1877	8.55e-28	107
Mmel_00000092-RA	sp|P59511|ATS20_MOUSE	67.299	1318	353	9	1	1285	152	1424	0	1882
Mmel_00000094-RA	sp|Q9NWZ3|IRAK4_HUMAN	67.181	454	142	4	26	478	1	448	0	612
Mmel_00000093-RA	sp|Q9H0K6|PUS7L_HUMAN	54.179	694	306	8	2	687	11	700	0	737
Mmel_00000095-RA	sp|Q5R7N2|TWF1_PONAB	76.608	342	38	1	19	318	9	350	0	535
Mmel_00000097-RA	sp|Q9H0C3|TM117_HUMAN	75.581	258	56	3	1	253	257	512	1.29e-125	369
Mmel_00000098-RA	sp|Q90827|NEL_CHICK	97.318	261	7	0	1	261	556	816	0	527
Mmel_00000099-RA	sp|Q90827|NEL_CHICK	91.275	149	13	0	1	149	333	481	2.31e-93	290
Mmel_00000101-RA	sp|Q6ZNG2|DBX2_HUMAN	75.635	197	45	1	2	195	137	333	2.02e-104	306
Mmel_00000103-RA	sp|Q4KMQ2|ANO6_HUMAN	72.54	874	223	7	2	868	47	910	0	1305
Mmel_00000105-RA	sp|Q68CP9|ARID2_HUMAN	84.804	1757	243	14	95	1834	86	1835	0	2900
Mmel_00000108-RA	sp|Q99590|SCAFB_HUMAN	50.302	1491	585	34	26	1391	1	1460	0	1112
Mmel_00000110-RA	sp|Q9H2H9|S38A1_HUMAN	88.501	487	55	1	52	538	2	487	0	854
Mmel_00000111-RA	sp|Q5F468|S38A2_CHICK	91.81	464	38	0	1	464	38	501	0	848
Mmel_00000113-RA	sp|Q5RE87|S38A4_PONAB	72.371	561	108	5	1	528	1	547	0	793
Mmel_00000115-RA	sp|Q5ZKQ3|RPAP3_CHICK	84.132	668	102	3	14	680	1	665	0	1118
Mmel_00000116-RA	sp|Q7T0P7|ATP23_XENLA	79.913	229	43	1	20	245	7	235	1.36e-138	391
Mmel_00000118-RA	sp|Q6UXM1|LRIG3_HUMAN	79.121	1001	201	3	76	1071	122	1119	0	1621
Mmel_00000120-RA	sp|O60669|MOT2_HUMAN	69.697	396	111	3	1	393	89	478	0	570
Mmel_00000122-RA	sp|Q8N3H0|F19A2_HUMAN	100	94	0	0	21	114	36	129	1.43e-65	198
Mmel_00000123-RA	sp|Q9Y4E8|UBP15_HUMAN	92.143	980	45	6	14	990	31	981	0	1788
Mmel_00000124-RA	sp|Q7Z3U7|MON2_HUMAN	91.032	1695	120	7	74	1747	34	1717	0	3024
Mmel_00000126-RA	sp|Q9Y2B1|RXLT1_HUMAN	66.219	447	140	4	1	441	1	442	0	624
Mmel_00000125-RA	sp|Q62463|V1AR_MOUSE	65.975	241	75	4	13	249	186	423	4.73e-114	336
Mmel_00000127-RA	sp|Q7Z6B7|SRGP1_HUMAN	90.793	1097	49	2	1	1097	41	1085	0	2060
Mmel_00000128-RA	sp|Q96MD2|CL066_HUMAN	92.825	446	31	1	1	446	1	445	0	838
Mmel_00000130-RA	sp|O43592|XPOT_HUMAN	88.641	942	57	4	3	894	21	962	0	1719
Mmel_00000131-RA	sp|Q9UHD2|TBK1_HUMAN	77.167	819	97	3	1	819	1	729	0	1301
Mmel_00000129-RA	sp|Q02543|RL18A_HUMAN	98.639	147	2	0	1	147	30	176	1.61e-107	306
Mmel_00000132-RA	sp|Q86WH2|RASF3_HUMAN	74.648	213	42	3	40	252	37	237	6.93e-110	319
Mmel_00000134-RA	sp|P15586|GNS_HUMAN	86.975	476	61	1	1	475	77	552	0	884
Mmel_00000135-RA	sp|Q69ZT9|TBC30_MOUSE	75.068	734	153	6	2	725	53	766	0	1100
Mmel_00000138-RA	sp|Q9Y2U8|MAN1_HUMAN	83.146	356	59	1	1	356	557	911	0	634
Mmel_00000136-RA	sp|Q9W6F8|WIF1_XENLA	63.492	126	14	1	1	94	214	339	3.21e-47	161
Mmel_00000141-RA	sp|Q5R930|MSRB3_PONAB	77.011	87	19	1	17	102	104	190	6.73e-43	141
Mmel_00000142-RA	sp|Q5ZHK9|LLPH_CHICK	69.444	108	24	2	1	108	1	99	1.05e-41	136
Mmel_00000143-RA	sp|Q9DA39|LFG4_MOUSE	67.194	253	47	2	87	325	8	238	2.47e-110	323
Mmel_00000144-RA	sp|Q8NG08|HELB_HUMAN	45.869	944	425	24	5	882	157	1080	0	712
Mmel_00000146-RA	sp|Q925T6|GRIP1_MOUSE	69.545	880	176	15	1	811	271	1127	0	1135
Mmel_00000148-RA	sp|Q5R6L5|CAND1_PONAB	90.05	1206	49	6	1	1135	25	1230	0	2127
Mmel_00000149-RA	sp|O57608|IFNG_PHACO	72.121	165	45	1	1	165	1	164	2.74e-84	248
Mmel_00000150-RA	sp|Q9GZX6|IL22_HUMAN	48.299	147	75	1	34	180	33	178	2.32e-45	150
Mmel_00000152-RA	sp|Q5ZMW6|MDM1_CHICK	64.12	733	175	11	52	743	6	691	0	817
Mmel_00000153-RA	sp|Q5RDM6|RAP1B_PONAB	100	184	0	0	1	184	1	184	7.69e-136	379
Mmel_00000154-RA	sp|P57740|NU107_HUMAN	80.043	922	176	4	3	917	4	924	0	1550
Mmel_00000156-RA	sp|P14384|CBPM_HUMAN	67.287	376	121	1	43	416	53	428	0	535
Mmel_00000157-RA	sp|Q16630|CPSF6_HUMAN	96.337	546	18	2	13	557	7	551	0	1020
Mmel_00000158-RA	sp|O95619|YETS4_HUMAN	97.647	170	4	0	1	170	58	227	6.67e-121	343
Mmel_00000155-RA	sp|P56951|MDM2_HORSE	71.111	270	72	2	133	398	223	490	7.98e-133	392
Mmel_00000160-RA	sp|Q3ZBH0|TCPB_BOVIN	92.884	534	38	0	3	536	2	535	0	995
Mmel_00000159-RA	sp|Q8WU20|FRS2_HUMAN	93.033	488	34	0	16	503	21	508	0	861
Mmel_00000164-RA	sp|Q6H1V1|BEST3_MOUSE	89.259	270	29	0	18	287	51	320	0	518
Mmel_00000161-RA	sp|P14091|CATE_HUMAN	51.042	384	178	4	16	397	20	395	2.98e-142	413
Mmel_00000167-RA	sp|Q96LU7|MRFL_HUMAN	52.106	902	329	13	50	854	14	909	0	822
Mmel_00000165-RA	sp|Q96QF0|RAB3I_HUMAN	84.829	468	69	2	5	471	10	476	0	828
Mmel_00000170-RA	sp|Q9ESK8|KCMB4_RAT	74.227	97	25	0	197	293	112	208	2.04e-49	166
Mmel_00000169-RA	sp|Q8C5L3|CNOT2_MOUSE	99.379	483	3	0	1	483	58	540	0	993
Mmel_00000168-RA	sp|Q9NZN8|CNOT2_HUMAN	62.319	69	18	1	1	61	17	85	5.67e-22	90.1
Mmel_00000171-RA	sp|P23467|PTPRB_HUMAN	72.231	1887	509	2	5	1877	105	1990	0	2859
Mmel_00000173-RA	sp|Q15256|PTPRR_HUMAN	88.424	311	36	0	1	311	347	657	0	590
Mmel_00000174-RA	sp|Q8R3G9|TSN8_MOUSE	49.528	212	86	6	29	234	21	217	4.21e-47	158
Mmel_00000175-RA	sp|F1MT22|LGR5_BOVIN	69.317	893	197	8	101	969	67	906	0	1211
Mmel_00000177-RA	sp|Q96HH6|TMM19_HUMAN	77.709	323	72	0	1	323	1	323	0	538
Mmel_00000178-RA	sp|P35282|RAB21_MOUSE	96.447	197	7	0	1	197	26	222	2.87e-143	400
Mmel_00000176-RA	sp|O60293|ZC3H1_HUMAN	67.795	2009	515	23	53	1950	1	1988	0	2362
Mmel_00000181-RA	sp|Q2HZ26|TPH2_MACMU	77.403	385	54	5	1	381	1	356	0	574
Mmel_00000179-RA	sp|Q9CXF4|TBC15_MOUSE	69.697	660	151	9	22	639	9	661	0	915
Mmel_00000182-RA	sp|Q96PR1|KCNC2_HUMAN	85.144	451	24	3	1	451	230	637	0	741
Mmel_00000183-RA	sp|Q9GKR6|CAYP2_MACFA	61.189	286	104	2	67	351	34	313	4.6e-124	362
Mmel_00000185-RA	sp|P48060|GLIP1_HUMAN	57.143	196	83	1	1	195	25	220	3.85e-80	250
Mmel_00000186-RA	sp|Q8BGA5|KRR1_MOUSE	86.197	355	49	0	7	361	26	380	0	593
Mmel_00000187-RA	sp|A6H767|NP1L1_BOVIN	88.804	393	42	2	1	393	1	391	0	605
Mmel_00000188-RA	sp|Q9BZF1|OSBL8_HUMAN	73.78	717	108	7	72	712	64	776	0	1036
Mmel_00000189-RA	sp|Q8IUH5|ZDH17_HUMAN	95.515	602	19	1	18	611	31	632	0	1206
Mmel_00000190-RA	sp|P50460|CSRP2_CHICK	98.454	194	3	0	1	194	1	194	4.03e-140	391
Mmel_00000191-RA	sp|Q96AV8|E2F7_HUMAN	56.152	894	366	16	31	917	31	905	0	890
Mmel_00000193-RA	sp|Q80TN7|NAV3_MOUSE	87.815	1469	160	5	14	1466	894	2359	0	2506
Mmel_00000192-RA	sp|Q8IVL0|NAV3_HUMAN	89.209	139	15	0	1	139	683	821	4.24e-81	263
Mmel_00000194-RA	sp|A0A075F932|SYT1_ANSCY	98.276	58	0	1	66	123	1	57	2.19e-29	114
Mmel_00000196-RA	sp|P47191|SYT1_CHICK	100	113	0	0	9	121	312	424	3.32e-78	239
Mmel_00000195-RA	sp|P47191|SYT1_CHICK	98.157	217	4	0	1	217	56	272	2.32e-155	441
Mmel_00000197-RA	sp|Q925B0|PAWR_MOUSE	68.376	117	37	0	8	124	217	333	3.69e-49	162
Mmel_00000198-RA	sp|Q90623|MYPT1_CHICK	84.501	871	43	5	31	856	162	985	0	1095
Mmel_00000199-RA	sp|P62250|RS16_RAT	90.566	106	1	1	1	97	41	146	6.92e-61	185
Mmel_00000201-RA	sp|Q9UMZ3|PTPRQ_HUMAN	70.218	2337	658	12	156	2469	11	2332	0	3407
Mmel_00000200-RA	sp|Q3ZCN5|OTOGL_HUMAN	64.898	886	296	1	1336	2206	1447	2332	0	1258
Mmel_00000202-RA	sp|Q08856|MYF5_CHICK	94.118	170	10	0	1	170	1	170	1.48e-115	332
Mmel_00000205-RA	sp|Q01795|MYF6_CHICK	79.861	144	28	1	3	146	100	242	1.55e-62	194
Mmel_00000204-RA	sp|O14910|LIN7A_HUMAN	97.006	167	3	1	9	173	67	233	5.14e-116	331
Mmel_00000207-RA	sp|Q14DH7|ACSS3_MOUSE	73.258	445	75	2	6	450	100	500	0	668
Mmel_00000208-RA	sp|Q14DH7|ACSS3_MOUSE	74.051	158	41	0	2	159	523	680	1.23e-78	249
Mmel_00000210-RA	sp|O75334|LIPA2_HUMAN	95.527	626	28	0	1	626	255	880	0	1172
Mmel_00000209-RA	sp|O75334|LIPA2_HUMAN	91.884	345	22	1	1	339	913	1257	0	665
Mmel_00000213-RA	sp|Q8N6Q8|MET25_HUMAN	88.462	78	9	0	1	78	525	602	6.39e-41	144
Mmel_00000212-RA	sp|Q8N6Q8|MET25_HUMAN	59.193	446	168	5	4	446	91	525	8.11e-178	513
Mmel_00000211-RA	sp|Q8R2N0|TAP26_MOUSE	56.383	188	52	3	13	171	54	240	7.65e-56	178
Mmel_00000214-RA	sp|Q56A06|TMTC2_MOUSE	91.509	106	9	0	1	106	654	759	2.21e-54	186
Mmel_00000216-RA	sp|P46063|RECQ1_HUMAN	82.119	453	81	0	36	488	72	524	0	813
Mmel_00000217-RA	sp|Q9XS59|S6A15_BOVIN	89.026	729	80	0	184	912	1	729	0	1353
Mmel_00000218-RA	sp|Q0P5X1|LRIQ1_MOUSE	42.625	678	340	10	563	1213	741	1396	1.5e-151	499
Mmel_00000219-RA	sp|P01156|NEUT_BOVIN	70.06	167	49	1	12	177	3	169	6.29e-80	237
Mmel_00000220-RA	sp|Q9UBM8|MGT4C_HUMAN	84.906	477	68	1	4	476	2	478	0	858
Mmel_00000222-RA	sp|Q5RFG5|CL029_PONAB	71.331	293	72	2	57	337	31	323	3.42e-154	439
Mmel_00000221-RA	sp|Q32KY7|CL050_BOVIN	31.935	310	158	7	52	321	45	341	2.64e-27	114
Mmel_00000224-RA	sp|Q6ZXV5|TMTC3_HUMAN	83.716	915	144	4	3	914	1	913	0	1610
Mmel_00000223-RA	sp|O15078|CE290_HUMAN	65.42	1203	344	6	673	1823	863	2045	0	1463
Mmel_00000225-RA	sp|Q09108|SCF_CHICK	78.964	309	27	2	128	434	6	278	1.3e-161	461
Mmel_00000226-RA	sp|Q2KJ36|DUS6_BOVIN	97.581	248	6	0	48	295	134	381	1.05e-178	501
Mmel_00000228-RA	sp|Q8TC44|POC1B_HUMAN	58.011	362	120	1	1	362	35	364	1.41e-149	434
Mmel_00000230-RA	sp|P11505|AT2B1_RAT	92.44	1283	62	4	1	1273	1	1258	0	2285
Mmel_00000233-RA	sp|O42235|KERA_CHICK	92.898	352	25	0	1	352	2	353	0	665
Mmel_00000232-RA	sp|Q90944|EPYC_CHICK	88.462	260	30	0	1	260	57	316	3.43e-170	475
Mmel_00000234-RA	sp|Q9DE67|LUM_COTJA	96.491	342	12	0	1	342	1	342	0	674
Mmel_00000235-RA	sp|P28675|PGS2_CHICK	97.917	288	6	0	1	288	70	357	0	569
Mmel_00000236-RA	sp|P34743|BTG1_CHICK	98.561	139	2	0	1	139	32	170	1.22e-101	290
Mmel_00000237-RA	sp|Q6ZR37|PKHG7_HUMAN	67.879	330	94	4	409	728	52	379	1.22e-154	459
Mmel_00000238-RA	sp|Q15075|EEA1_HUMAN	75.071	1412	342	2	2	1411	8	1411	0	1947
Mmel_00000240-RA	sp|Q5R7J6|UBE2N_PONAB	100	89	0	0	1	89	64	152	7.08e-61	184
Mmel_00000239-RA	sp|Q5RAF0|NUDT4_PONAB	93.919	148	9	0	9	156	33	180	1.05e-101	292
Mmel_00000242-RA	sp|Q9Y6G3|RM42_HUMAN	65.035	143	40	2	14	154	8	142	4.88e-59	182
Mmel_00000243-RA	sp|O88843|CRADD_MOUSE	68.807	109	34	0	5	113	1	109	3.8e-50	160
Mmel_00000245-RA	sp|Q9QZC2|PLXC1_MOUSE	61.665	1213	395	12	44	1195	370	1573	0	1433
Mmel_00000246-RA	sp|Q9Y592|CEP83_HUMAN	64.646	693	237	2	1	685	1	693	0	833
Mmel_00000247-RA	sp|Q9ULS5|TMCC3_HUMAN	85.202	446	60	1	1	440	32	477	0	796
Mmel_00000248-RA	sp|Q7TMF3|NDUAC_MOUSE	75.61	123	30	0	29	151	23	145	1.18e-69	209
Mmel_00000250-RA	sp|Q6ZV73|FGD6_HUMAN	77.168	565	70	4	3	512	809	1369	0	887
Mmel_00000249-RA	sp|Q95K90|NR2C1_MACFA	62.941	510	116	6	2	439	95	603	0	584
Mmel_00000251-RA	sp|Q9HBM0|VEZA_HUMAN	63.075	761	240	6	82	808	8	761	0	940
Mmel_00000253-RA	sp|Q3ZC89|MAP2_BOVIN	78.043	419	11	2	1	366	87	477	0	656
Mmel_00000254-RA	sp|D2HBJ8|UBP44_AILME	76.117	716	159	7	78	790	1	707	0	1117
Mmel_00000258-RA	sp|Q96NU7|HUTI_HUMAN	85.139	323	48	0	1	323	104	426	0	548
Mmel_00000259-RA	sp|P21213|HUTH_RAT	88.612	641	73	0	1	641	1	641	0	1176
Mmel_00000260-RA	sp|P09960|LKHA4_HUMAN	68.421	608	148	3	1	564	4	611	0	880
Mmel_00000257-RA	sp|Q9JI33|NET4_MOUSE	80.6	433	82	1	3	433	195	627	0	738
Mmel_00000261-RA	sp|P41970|ELK3_HUMAN	85.46	337	46	2	33	366	1	337	1.04e-173	492
Mmel_00000265-RA	sp|Q00537|CDK17_HUMAN	98.326	239	3	1	6	244	138	375	2.68e-170	482
Mmel_00000264-RA	sp|Q00537|CDK17_HUMAN	71.223	139	14	2	4	116	374	512	7.89e-59	192
Mmel_00000267-RA	sp|Q96N23|CFA54_HUMAN	41.719	2699	1364	50	334	2939	513	3095	0	1898
Mmel_00000268-RA	sp|Q8NHV4|NEDD1_HUMAN	63.731	670	219	9	23	678	1	660	0	843
Mmel_00000272-RA	sp|O14727|APAF_HUMAN	70.777	1249	356	5	1	1244	1	1245	0	1838
Mmel_00000271-RA	sp|Q8VEM8|MPCP_MOUSE	92.233	309	24	0	10	318	49	357	0	572
Mmel_00000269-RA	sp|Q61029|LAP2B_MOUSE	63.333	390	106	6	4	391	92	446	6.45e-156	450
Mmel_00000270-RA	sp|A2VE53|IKIP_BOVIN	58.73	252	104	0	296	547	87	338	8.14e-96	298
Mmel_00000273-RA	sp|Q8BIZ1|ANS1B_MOUSE	98.148	162	3	0	1	162	1098	1259	3.36e-107	335
Mmel_00000275-RA	sp|Q9DEE9|ARP6_CHICK	98.663	374	5	0	41	414	23	396	0	769
Mmel_00000276-RA	sp|Q91WS7|DEPD7_MOUSE	33.708	445	247	13	7	430	89	506	1.33e-74	245
Mmel_00000274-RA	sp|A0JNW5|UH1BL_HUMAN	78.66	567	80	2	40	565	15	581	0	909
Mmel_00000280-RA	sp|Q86XJ1|GA2L3_HUMAN	57.799	718	265	13	1	705	1	693	0	670
Mmel_00000278-RA	sp|Q8NDX2|VGLU3_HUMAN	84.89	589	87	1	1	587	1	589	0	1048
Mmel_00000279-RA	sp|Q3SZL0|NR1H4_BOVIN	78.111	434	62	1	6	406	49	482	0	714
Mmel_00000277-RA	sp|Q6P3W7|SCYL2_HUMAN	85.177	931	133	5	10	937	1	929	0	1617
Mmel_00000281-RA	sp|Q8C5H1|ANO4_MOUSE	89.211	862	35	2	19	880	152	955	0	1556
Mmel_00000282-RA	sp|Q8N695|SC5A8_HUMAN	71.498	621	134	6	1	595	7	610	0	879
Mmel_00000283-RA	sp|O75691|UTP20_HUMAN	68.031	2809	859	11	1	2796	1	2783	0	3886
Mmel_00000285-RA	sp|Q92621|NU205_HUMAN	87.19	2014	229	3	1	1987	1	2012	0	3618
Mmel_00000284-RA	sp|P61212|ARL1_RAT	96.685	181	6	0	34	214	1	181	4.6e-129	363
Mmel_00000286-RA	sp|O95628|CNOT4_HUMAN	88.067	595	19	1	1	595	1	543	0	1073
Mmel_00000289-RA	sp|Q5ZLL7|WDR91_CHICK	83.489	751	51	2	1	678	1	751	0	1264
Mmel_00000287-RA	sp|Q9Z2J0|S23A1_MOUSE	43.779	217	109	4	188	393	384	598	5.12e-47	173
Mmel_00000288-RA	sp|Q7Z7C7|STRA8_HUMAN	46.082	319	124	5	12	327	33	306	2.57e-69	222
Mmel_00000290-RA	sp|Q13956|CNCG_HUMAN	98.551	69	1	0	17	85	15	83	1.01e-45	144
Mmel_00000295-RA	sp|Q95NE0|NAR4_PANTR	46.774	248	129	1	35	282	45	289	6.66e-73	230
Mmel_00000292-RA	sp|Q96DN0|ERP27_HUMAN	36.226	265	121	3	18	234	9	273	2.17e-51	171
Mmel_00000291-RA	sp|Q9TU03|GDIR2_BOVIN	92	200	16	0	1	200	1	200	9.49e-138	385
Mmel_00000296-RA	sp|Q923D5|WBP11_MOUSE	82.039	412	64	3	1	411	1	403	0	562
Mmel_00000293-RA	sp|O42413|MGP_CHICK	71.264	87	24	1	18	104	18	103	1.19e-38	127
Mmel_00000297-RA	sp|P70082|H2AJ_CHICK	98.462	65	1	0	10	74	65	129	2.71e-39	129
Mmel_00000298-RA	sp|P84239|H3_URECA	100	136	0	0	182	317	1	136	1.11e-92	274
Mmel_00014238-RA	sp|P23965|ECI1_RAT	59.649	114	46	0	1	114	176	289	1.65e-46	154
Mmel_00014239-RA	sp|Q9D1G0|DNSL2_MOUSE	65.909	264	89	1	14	277	13	275	3.91e-130	373
Mmel_00010502-RA	sp|O14525|ASTN1_HUMAN	81.673	562	60	4	74	619	456	990	0	960
Mmel_00010503-RA	sp|O14525|ASTN1_HUMAN	93.333	75	5	0	11	85	1224	1298	1.37e-41	147
Mmel_00010501-RA	sp|Q61137|ASTN1_MOUSE	88.235	51	6	0	7	57	91	141	1.61e-25	100
Mmel_00010504-RA	sp|Q9BXP8|PAPP2_HUMAN	58.621	1160	297	10	1	1012	667	1791	0	1329
Mmel_00010506-RA	sp|Q00546|TENR_CHICK	85.461	1355	132	3	1	1292	1	1353	0	2402
Mmel_00010505-RA	sp|Q9R1A8|COP1_MOUSE	82.53	332	15	5	1	289	144	475	0	543
Mmel_00010508-RA	sp|Q6B860|RT14_BOVIN	81.25	128	24	0	1	128	1	128	3.17e-73	217
Mmel_00010509-RA	sp|Q3T168|CYBP_BOVIN	70.909	220	53	4	3	211	8	227	5.49e-98	287
Mmel_00010510-RA	sp|B7ZAP0|RBG10_HUMAN	89.627	241	23	2	40	279	14	253	1.37e-140	398
Mmel_00010511-RA	sp|Q9Y2T5|GPR52_HUMAN	90.028	361	36	0	1	361	1	361	0	681
Mmel_00010512-RA	sp|Q5ZJ17|RBG1L_CHICK	86.165	571	50	2	1	542	1	571	0	998
Mmel_00010513-RA	sp|Q9P1Z9|CC180_HUMAN	30.734	654	382	12	227	832	1016	1646	5.04e-70	256
Mmel_00010514-RA	sp|Q9P1Z9|CC180_HUMAN	37.5	216	135	0	87	302	288	503	1.17e-39	153
Mmel_00014689-RA	sp|Q6WG17|ST6B1_GORGO	47.541	183	83	3	2	183	3	173	7.32e-54	176
Mmel_00013410-RA	sp|Q99JP7|GGT7_MOUSE	67.797	295	93	1	262	554	368	662	6.66e-131	399
Mmel_00013409-RA	sp|Q9CQT9|CT024_MOUSE	86.813	91	12	0	1	91	39	129	1.72e-54	168
Mmel_00013411-RA	sp|Q14686|NCOA6_HUMAN	73.463	976	183	8	1	905	1	971	0	1264
Mmel_00013665-RA	sp|Q8BHW2|OSCP1_MOUSE	74.581	358	90	1	4	360	22	379	0	558
Mmel_00013667-RA	sp|Q7T0B1|STK40_CHICK	98.618	434	6	0	1	434	1	434	0	888
Mmel_00013666-RA	sp|P82913|RT15_BOVIN	53.261	92	35	2	22	111	42	127	2.4e-21	89.7
Mmel_00013668-RA	sp|Q5M7V8|TR150_RAT	79.935	917	161	11	52	966	56	951	0	1150
Mmel_00014798-RA	sp|A0JNI9|S7A14_BOVIN	87.097	93	10	1	4	96	102	192	1.91e-46	161
Mmel_00014087-RA	sp|Q8TC57|M1AP_HUMAN	47.852	512	226	8	22	497	19	525	1.96e-152	448
Mmel_00009244-RA	sp|Q91ZF1|KCJ15_RAT	84.697	379	57	1	46	424	28	405	0	671
Mmel_00009245-RA	sp|Q90837|ERG_CHICK	79.667	300	10	4	1	299	47	296	6.88e-164	472
Mmel_00009246-RA	sp|P10157|ETS2_CHICK	93.29	462	31	0	7	468	18	479	0	904
Mmel_00009251-RA	sp|Q9NSI6|BRWD1_HUMAN	93.5	200	13	0	1	200	425	624	4.71e-137	426
Mmel_00009253-RA	sp|Q5R6K7|WRB_PONAB	81.757	148	27	0	2	149	27	174	5.55e-90	261
Mmel_00009254-RA	sp|Q9WUZ7|SH3BG_MOUSE	68.125	160	47	1	1	160	1	156	1.52e-71	219
Mmel_00009250-RA	sp|Q9NSI6|BRWD1_HUMAN	90.076	131	13	0	3	133	204	334	1.58e-82	266
Mmel_00009255-RA	sp|Q9N294|B3GT5_PANPA	59.468	301	112	2	8	308	9	299	2.18e-126	366
Mmel_00009247-RA	sp|B0CM32|PSMG1_PAPAN	55.556	225	82	4	11	218	66	289	1.55e-76	235
Mmel_00009249-RA	sp|Q9NSI6|BRWD1_HUMAN	48.693	1339	535	33	100	1351	875	2148	0	985
Mmel_00009257-RA	sp|P48539|PCP4_HUMAN	89.362	47	5	0	104	150	16	62	2.5e-21	84.3
Mmel_00009258-RA	sp|F1NY98|DSCAM_CHICK	85.646	627	12	2	1	627	263	811	0	1087
Mmel_00009259-RA	sp|Q6IE75|BACE2_RAT	68.249	337	64	1	43	336	100	436	2.28e-161	464
Mmel_00009261-RA	sp|P33238|MX_ANAPL	61.918	709	230	9	1	676	20	721	0	821
Mmel_00009260-RA	sp|Q9D309|FAM3B_MOUSE	57.205	229	96	1	16	242	6	234	1.65e-96	285
Mmel_00009262-RA	sp|Q9ERK0|RIPK4_MOUSE	58.902	601	231	6	1	586	64	663	0	645
Mmel_00009268-RA	sp|Q5DID0|UROL1_HUMAN	50.275	545	243	9	640	1168	786	1318	3.59e-162	520
Mmel_00009267-RA	sp|Q9ULJ3|ZBT21_HUMAN	78.058	1071	217	6	1	1058	1	1066	0	1625
Mmel_00009265-RA	sp|Q9Y426|C2CD2_HUMAN	52.805	606	237	10	7	571	97	694	0	543
Mmel_00009264-RA	sp|P57071|PRD15_HUMAN	54.756	389	113	5	53	421	420	765	1.44e-127	405
Mmel_00010199-RA	sp|Q8N608|DPP10_HUMAN	85.526	76	11	0	4	79	16	91	1.18e-38	139
Mmel_00010201-RA	sp|Q8N608|DPP10_HUMAN	83.802	605	97	1	1	605	193	796	0	1080
Mmel_00010203-RA	sp|Q9NVP1|DDX18_HUMAN	86.314	548	67	4	98	639	124	669	0	957
Mmel_00010205-RA	sp|Q6PQZ3|INSI2_PIG	91.228	228	17	1	1	228	1	225	3.16e-153	427
Mmel_00010204-RA	sp|Q5ZKI4|CCD93_CHICK	93.031	617	30	1	25	641	14	617	0	1146
Mmel_00010206-RA	sp|Q05916|HME1_CHICK	98.077	104	2	0	1	104	230	333	3.12e-64	200
Mmel_00007679-RA	sp|Q9UKX5|ITA11_HUMAN	66.073	1123	216	10	1	1007	103	1176	0	1454
Mmel_00007677-RA	sp|Q8HY67|AN32A_CANLF	96.25	160	6	0	46	205	16	175	5.64e-104	303
Mmel_00007678-RA	sp|Q9UQ03|COR2B_HUMAN	96.667	90	3	0	1	90	73	162	9.91e-58	188
Mmel_00007682-RA	sp|Q5XGC7|CALL4_XENTR	68.376	117	37	0	1	117	37	153	1.01e-55	173
Mmel_00007680-RA	sp|Q5ZM55|FEM1B_CHICK	96.703	546	18	0	12	557	82	627	0	1109
Mmel_00007684-RA	sp|O75925|PIAS1_HUMAN	88.889	162	18	0	1	162	10	171	3.81e-94	289
Mmel_00007681-RA	sp|O75925|PIAS1_HUMAN	85.938	384	19	4	2	352	206	587	0	639
Mmel_00007683-RA	sp|O75925|PIAS1_HUMAN	97.826	46	1	0	23	68	158	203	4.16e-24	97.8
Mmel_00007689-RA	sp|Q9R0Z7|AAGAB_RAT	74.483	290	71	1	1	287	26	315	3.27e-147	418
Mmel_00007690-RA	sp|P84025|SMAD3_RAT	100	88	0	0	1	88	338	425	1.7e-58	187
Mmel_00007685-RA	sp|Q86VS3|IQCH_HUMAN	61.875	320	122	0	6	325	700	1019	2.89e-137	417
Mmel_00007691-RA	sp|P84023|SMAD3_CHICK	99.259	135	1	0	3	137	70	204	1.12e-96	288
Mmel_00007686-RA	sp|Q86VS3|IQCH_HUMAN	37.961	569	283	7	14	551	170	699	4.01e-120	381
Mmel_00007692-RA	sp|P84023|SMAD3_CHICK	100	69	0	0	1	69	1	69	9.55e-40	141
Mmel_00007697-RA	sp|Q5F416|TIPIN_CHICK	73.665	281	68	3	1	275	3	283	1.52e-129	371
Mmel_00007693-RA	sp|Q6UWM7|LCTL_HUMAN	72.491	538	147	1	32	568	30	567	0	847
Mmel_00007695-RA	sp|Q28346|RL4_CANLF	89.916	357	36	0	3	359	2	358	0	654
Mmel_00007696-RA	sp|Q91447|MP2K1_SERCA	98.925	372	4	0	29	400	17	388	0	758
Mmel_00007694-RA	sp|Q6IRM9|ZWILC_XENLA	55.536	560	243	6	2	557	37	594	0	649
Mmel_00007698-RA	sp|Q5U2P0|DI3L1_RAT	77.841	1047	228	2	1	1047	8	1050	0	1718
Mmel_00007699-RA	sp|A6BM72|MEG11_HUMAN	88	100	12	0	18	117	5	104	4.99e-57	194
Mmel_00007703-RA	sp|A6BM72|MEG11_HUMAN	68.529	340	63	3	14	352	608	904	7e-151	455
Mmel_00007702-RA	sp|Q96KG7|MEG10_HUMAN	66.923	130	43	0	6	135	305	434	3.14e-55	190
Mmel_00007704-RA	sp|Q5ZJN2|RB11A_CHICK	99.537	216	1	0	1	216	1	216	8.07e-163	450
Mmel_00007700-RA	sp|Q80T91|MEG11_MOUSE	80.247	81	16	0	1	81	173	253	7.22e-37	134
Mmel_00007709-RA	sp|Q9IAL8|NCKX1_CHICK	73.058	605	91	8	1	557	1	581	0	766
Mmel_00007717-RA	sp|Q6V1X1|DPP8_HUMAN	88.776	882	99	0	1	882	17	898	0	1661
Mmel_00007707-RA	sp|Q7Z401|MYCPP_HUMAN	73.561	1929	356	21	29	1869	1	1863	0	2787
Mmel_00007714-RA	sp|Q5ZK21|INT14_CHICK	90.664	482	9	1	1	446	37	518	0	894
Mmel_00007715-RA	sp|Q5ZM57|HACD3_CHICK	68.025	319	21	2	3	240	44	362	2.33e-138	395
Mmel_00007718-RA	sp|Q8TDY8|IGDC4_HUMAN	70.238	924	265	7	7	927	241	1157	0	1289
Mmel_00007722-RA	sp|O75339|CILP1_HUMAN	71.15	974	269	2	67	1040	203	1164	0	1485
Mmel_00007719-RA	sp|Q8IVU1|IGDC3_HUMAN	75.273	550	135	1	39	587	138	687	0	891
Mmel_00007720-RA	sp|Q7TMM8|PAR16_MOUSE	69.466	262	80	0	1	262	59	320	1.43e-132	380
Mmel_00007721-RA	sp|O42329|GNRR2_CLAGA	57.547	318	124	3	61	367	23	340	5.04e-125	369
Mmel_00007723-RA	sp|Q96DP5|FMT_HUMAN	63.485	241	87	1	1	241	141	380	2.32e-114	336
Mmel_00007732-RA	sp|Q9NZD8|SPG21_HUMAN	94.444	288	16	0	37	324	21	308	0	573
Mmel_00007726-RA	sp|Q08E00|RASLC_BOVIN	72.222	216	57	1	14	229	54	266	3.09e-106	310
Mmel_00007733-RA	sp|Q495B1|AKD1A_HUMAN	60.904	509	184	3	2	499	12	516	0	636
Mmel_00007731-RA	sp|O76031|CLPX_HUMAN	90.554	614	38	2	3	605	28	632	0	1039
Mmel_00007730-RA	sp|Q8N8D1|PDCD7_HUMAN	78.238	193	42	0	1	193	291	483	4.53e-88	270
Mmel_00007728-RA	sp|F5GYI3|UBA1L_HUMAN	75.676	74	18	0	3	76	304	377	5.58e-34	122
Mmel_00007738-RA	sp|Q2KI76|SELS_BOVIN	77.778	117	25	1	3	118	72	188	2.37e-59	183
Mmel_00007737-RA	sp|Q4R8Y8|RU2A_MACFA	88.318	214	23	1	1	214	44	255	4.29e-128	364
Mmel_00007736-RA	sp|P29122|PCSK6_HUMAN	58.824	476	142	3	1	422	425	900	0	564
Mmel_00007735-RA	sp|P29122|PCSK6_HUMAN	78.195	133	26	1	4	133	100	232	1.17e-68	225
Mmel_00007734-RA	sp|Q8TD55|PKHO2_HUMAN	39.959	488	178	21	4	475	94	482	6.09e-67	225
Mmel_00007739-RA	sp|Q86X52|CHSS1_HUMAN	89.623	530	42	1	120	636	273	802	0	972
Mmel_00007741-RA	sp|Q38SD2|LRRK1_HUMAN	76.861	1115	222	4	7	1085	33	1147	0	1768
Mmel_00007743-RA	sp|P47895|AL1A3_HUMAN	88.063	444	53	0	3	446	69	512	0	830
Mmel_00007745-RA	sp|Q9H672|ASB7_HUMAN	99.344	305	2	0	1	305	1	305	0	630
Mmel_00007747-RA	sp|Q8IU89|CERS3_HUMAN	54.217	332	119	3	10	310	4	333	2e-115	341
Mmel_00007748-RA	sp|Q8TE56|ATS17_HUMAN	85.106	141	21	0	66	206	204	344	3.24e-76	251
Mmel_00007746-RA	sp|Q8NG48|LINES_HUMAN	34.028	288	150	7	198	450	268	550	2.67e-34	142
Mmel_00007750-RA	sp|Q8TE56|ATS17_HUMAN	90.608	181	17	0	1	181	492	672	3.91e-112	346
Mmel_00007751-RA	sp|P59509|ATS19_MOUSE	74.167	120	31	0	1	120	766	885	2.54e-60	202
Mmel_00007749-RA	sp|Q8TE56|ATS17_HUMAN	88.66	97	11	0	22	118	395	491	2.51e-55	189
Mmel_00007752-RA	sp|Q8TE56|ATS17_HUMAN	94.393	107	6	0	1	107	984	1090	1.79e-65	216
Mmel_00007753-RA	sp|Q5REP3|LYSM4_PONAB	57.071	198	79	3	3	195	48	244	1.62e-70	219
Mmel_00007755-RA	sp|Q2KIA0|MEF2C_BOVIN	98.837	86	1	0	1	86	1	86	7.52e-57	183
Mmel_00007754-RA	sp|Q02078|MEF2A_HUMAN	79.05	463	69	6	18	458	51	507	0	622
Mmel_00007757-RA	sp|Q86X40|LRC28_HUMAN	92.093	215	17	0	24	238	129	343	1.86e-143	408
Mmel_00007758-RA	sp|O15061|SYNEM_HUMAN	34.3	1379	719	36	4	1279	271	1565	0	584
Mmel_00007759-RA	sp|P08069|IGF1R_HUMAN	83.463	1161	178	6	1	1155	215	1367	0	1994
Mmel_00007762-RA	sp|P63155|CRNL1_RAT	67.29	428	112	4	331	737	3	423	0	551
Mmel_00007763-RA	sp|P63155|CRNL1_RAT	79.661	59	12	0	1	59	617	675	3.84e-26	105
Mmel_00007761-RA	sp|Q9ESW8|PGPI_MOUSE	48.969	194	96	2	20	211	1	193	1.06e-62	197
Mmel_00007764-RA	sp|Q8NCT1|ARRD4_HUMAN	85.531	311	45	0	6	316	103	413	0	562
Mmel_00013258-RA	sp|Q2HJ23|MLP3A_BOVIN	97.196	107	3	0	1	107	15	121	8.44e-74	217
Mmel_00013257-RA	sp|Q9NP97|DLRB1_HUMAN	92.632	95	7	0	1	95	2	96	3.96e-61	184
Mmel_00013254-RA	sp|Q8C863|ITCH_MOUSE	76.147	763	122	9	23	759	72	800	0	1125
Mmel_00013255-RA	sp|Q8C863|ITCH_MOUSE	97.802	91	2	0	8	98	774	864	5.27e-57	191
Mmel_00013253-RA	sp|Q96J02|ITCH_HUMAN	80.282	71	13	1	1	70	1	71	2.66e-29	111
Mmel_00014678-RA	sp|P34978|TA2R_RAT	64.032	253	88	2	21	273	22	271	5.26e-101	301
Mmel_00014588-RA	sp|Q13045|FLII_HUMAN	79.156	1209	127	7	1	1089	22	1225	0	1857
Mmel_00014797-RA	sp|Q3SXY8|AR13B_HUMAN	43.617	94	53	0	1	94	1	94	3.08e-22	92
Mmel_00010193-RA	sp|A4IFC4|SH3L2_BOVIN	69.231	117	25	1	22	138	2	107	6.12e-52	163
Mmel_00010194-RA	sp|Q3S8M4|ELOV4_MACMU	80.142	282	54	2	3	283	34	314	2.27e-168	471
Mmel_00010196-RA	sp|Q62227|NR0B2_MOUSE	38.168	262	152	4	11	270	7	260	5.21e-51	171
Mmel_00010195-RA	sp|P33981|TTK_HUMAN	59.314	875	316	18	1	864	1	846	0	939
Mmel_00010198-RA	sp|Q96IP4|TET5A_HUMAN	94.01	384	22	1	81	464	60	442	0	752
Mmel_00014888-RA	sp|Q9WVQ1|MAGI2_MOUSE	94.811	212	10	1	1	211	470	681	2.55e-137	417
Mmel_00015165-RA	sp|Q9UMS4|PRP19_HUMAN	81.481	189	4	1	1	189	160	317	3.63e-99	298
Mmel_00015107-RA	sp|Q2UVH8|ACRO_MELGA	56.061	132	58	0	3	134	40	171	1.09e-46	157
Mmel_00011249-RA	sp|Q92624|APBP2_HUMAN	97.037	540	16	0	2	541	45	584	0	1088
Mmel_00011248-RA	sp|Q9QZ67|PPM1D_MOUSE	91.379	58	5	0	6	63	151	208	3.03e-30	114
Mmel_00011247-RA	sp|Q9QZ67|PPM1D_MOUSE	57.402	331	117	5	2	308	268	598	4.35e-124	370
Mmel_00011246-RA	sp|Q9H6U6|BCAS3_HUMAN	94.156	154	8	1	1	153	5	158	4.23e-97	302
Mmel_00011244-RA	sp|Q9H6U6|BCAS3_HUMAN	88.119	101	12	0	1	101	230	330	2.24e-55	186
Mmel_00011245-RA	sp|Q8CCN5|BCAS3_MOUSE	100	44	0	0	1	44	177	220	9.57e-25	97.1
Mmel_00011253-RA	sp|Q15649|ZNHI3_HUMAN	64	75	27	0	316	390	81	155	3.82e-24	100
Mmel_00011256-RA	sp|Q71R50|DHR11_CHICK	67.005	197	19	3	30	197	41	220	6.83e-84	252
Mmel_00011250-RA	sp|Q8NFA0|UBP32_HUMAN	84.549	1618	218	11	34	1639	7	1604	0	2774
Mmel_00011255-RA	sp|Q6GVH4|GGNB2_CHICK	96.114	669	24	1	1	669	32	698	0	1340
Mmel_00011254-RA	sp|Q569U0|MYO19_XENLA	64.54	815	274	4	5	819	17	816	0	1070
Mmel_00011252-RA	sp|Q95323|CAH4_BOVIN	37.952	332	152	9	5	330	22	305	2.63e-62	204
Mmel_00005177-RA	sp|Q32KV4|DC2L1_BOVIN	66.857	350	114	1	1	350	4	351	1.21e-179	504
Mmel_00005175-RA	sp|Q8IVE3|PKHH2_HUMAN	80.36	1502	284	6	24	1523	1	1493	0	2447
Mmel_00005173-RA	sp|A8C754|THADA_CHICK	80.956	1276	222	2	52	1306	1	1276	0	2020
Mmel_00005179-RA	sp|Q9DBM0|ABCG8_MOUSE	61.605	698	215	5	2	673	3	673	0	873
Mmel_00005178-RA	sp|Q99PE8|ABCG5_MOUSE	58.013	624	218	3	3	583	11	633	0	734
Mmel_00005181-RA	sp|Q28C74|LPPRC_XENTR	60.323	867	318	4	10	850	41	907	0	1076
Mmel_00005180-RA	sp|Q28C74|LPPRC_XENTR	47.93	459	221	3	1	445	930	1384	2.61e-137	430
Mmel_00005182-RA	sp|O75688|PPM1B_HUMAN	91.509	424	36	0	19	442	1	424	0	821
Mmel_00005183-RA	sp|Q91WV7|SLC31_MOUSE	61.111	684	251	6	17	689	3	682	0	882
Mmel_00005184-RA	sp|Q5ZKL5|PPCEL_CHICK	76.602	718	146	2	7	703	2	718	0	1157
Mmel_00005185-RA	sp|Q7Z624|CMKMT_HUMAN	93.407	91	6	0	1	91	209	299	1.24e-58	185
Mmel_00005189-RA	sp|Q497V5|SRBD1_MOUSE	52.414	435	187	7	14	432	1	431	3.6e-137	421
Mmel_00005187-RA	sp|Q8N5C6|SRBD1_HUMAN	75.321	312	68	2	3	305	684	995	4.36e-164	484
Mmel_00005188-RA	sp|Q8N5C6|SRBD1_HUMAN	76.415	106	18	1	16	121	506	604	2.19e-47	165
Mmel_00005190-RA	sp|P09216|KPCE_RAT	97.326	187	4	1	2	188	138	323	5.97e-129	385
Mmel_00005191-RA	sp|Q99814|EPAS1_HUMAN	70.125	800	195	10	10	766	72	870	0	1096
Mmel_00005193-RA	sp|Q9JJL4|RHOQ_RAT	97.826	138	3	0	1	138	68	205	7.82e-97	280
Mmel_00005194-RA	sp|O09101|PIGF_MOUSE	50	80	40	0	1	80	1	80	1.14e-22	92
Mmel_00005195-RA	sp|Q5ZKB6|CRIPT_CHICK	98.947	95	1	0	1	95	7	101	6.14e-66	196
Mmel_00005196-RA	sp|O75159|SOCS5_HUMAN	90.419	501	47	1	1	500	1	501	0	920
Mmel_00005198-RA	sp|Q8K5B3|MCFD2_RAT	69.63	135	40	1	38	171	11	145	1.02e-61	190
Mmel_00005199-RA	sp|Q9ULT0|TTC7A_HUMAN	72.674	344	91	2	10	353	61	401	9.89e-164	483
Mmel_00005200-RA	sp|Q9ULT0|TTC7A_HUMAN	84.404	109	17	0	54	162	400	508	3.34e-57	195
Mmel_00005201-RA	sp|P0DP35|CAM2B_XENLA	100	148	0	0	25	172	2	149	9.57e-105	299
Mmel_00005202-RA	sp|Q5I085|PP1B_XENTR	100	310	0	0	2	311	18	327	0	645
Mmel_00005204-RA	sp|P18625|FOSL2_CHICK	98.667	225	3	0	1	225	99	323	1.68e-157	441
Mmel_00005203-RA	sp|Q6P1J6|PLB1_HUMAN	51.469	1123	430	18	67	1098	107	1205	0	1065
Mmel_00005205-RA	sp|Q9H477|RBSK_HUMAN	73.729	236	62	0	11	246	30	265	4.95e-126	364
Mmel_00005209-RA	sp|Q9CZV5|ST65G_MOUSE	85.922	412	58	0	1	412	1	412	0	731
Mmel_00005208-RA	sp|Q9BWU0|NADAP_HUMAN	72.468	316	86	1	16	331	326	640	1.14e-155	464
Mmel_00005210-RA	sp|Q9ULH4|LRFN2_HUMAN	83.084	467	70	2	1	458	1	467	0	780
Mmel_00005212-RA	sp|Q5RKZ7|MOCS1_MOUSE	68.631	628	157	10	10	635	46	635	0	843
Mmel_00005216-RA	sp|A0A1D5P556|DAAM2_CHICK	97.547	1019	21	1	1	1015	57	1075	0	2044
Mmel_00005218-RA	sp|Q96T55|KCNKG_HUMAN	67.766	273	83	3	17	289	17	284	2.76e-126	365
Mmel_00005217-RA	sp|Q6ZMV9|KIF6_HUMAN	86.26	262	36	0	10	271	133	394	5.98e-166	483
Mmel_00005219-RA	sp|Q96T54|KCNKH_HUMAN	62.439	205	77	0	55	259	78	282	3.38e-73	231
Mmel_00005221-RA	sp|O95279|KCNK5_HUMAN	69.231	442	106	8	42	459	63	498	0	558
Mmel_00005222-RA	sp|Q96JB1|DYH8_HUMAN	76.945	3483	652	12	492	3881	1066	4490	0	5645
Mmel_00005224-RA	sp|Q96Q07|BTBD9_HUMAN	94.792	384	20	0	37	420	1	384	0	764
Mmel_00005223-RA	sp|Q6P7Q4|LGUL_RAT	84.699	183	27	1	1	182	1	183	1.91e-116	330
Mmel_00005225-RA	sp|Q0WYX8|MDGA1_CHICK	96.552	522	18	0	10	531	14	535	0	1046
Mmel_00005232-RA	sp|Q14CH7|SYAM_MOUSE	61.53	915	337	5	1	911	77	980	0	1137
Mmel_00005230-RA	sp|A2VE39|CMTR1_BOVIN	80.192	833	150	3	1	818	1	833	0	1384
Mmel_00005231-RA	sp|O76064|RNF8_HUMAN	59.111	450	173	4	1	443	38	483	9.2e-180	515
Mmel_00005233-RA	sp|Q4R642|DRC5_MACFA	56.616	461	183	3	6	454	27	482	0	525
Mmel_00005236-RA	sp|Q8TB61|S35B2_HUMAN	75.472	424	102	1	21	444	11	432	0	641
Mmel_00005235-RA	sp|O54910|IKBE_MOUSE	56.327	245	90	3	1	234	126	364	3.01e-84	258
Mmel_00005234-RA	sp|A7E2I7|T151B_DANRE	81.236	437	72	3	3	429	27	463	0	712
Mmel_00005237-RA	sp|Q04619|HS90B_CHICK	92.278	518	38	2	431	947	209	725	0	887
Mmel_00005240-RA	sp|P00789|CANX_CHICK	94.821	251	13	0	2	252	447	697	2.58e-162	469
Mmel_00005242-RA	sp|P00789|CANX_CHICK	95.652	138	6	0	12	149	191	328	1.44e-90	280
Mmel_00005241-RA	sp|P00789|CANX_CHICK	96.364	55	2	0	1	55	329	383	1.72e-31	118
Mmel_00010872-RA	sp|A7MB54|HLX_BOVIN	83.544	158	15	1	37	183	165	322	1.45e-84	263
Mmel_00010869-RA	sp|Q9P0L2|MARK1_HUMAN	81.197	819	58	3	22	785	18	795	0	1325
Mmel_00010871-RA	sp|Q1LZH1|MARC2_BOVIN	65.882	255	87	0	1	255	81	335	1.85e-125	362
Mmel_00010874-RA	sp|Q9Y6W6|DUS10_HUMAN	80.443	271	50	1	1	268	6	276	4.45e-150	432
Mmel_00010873-RA	sp|Q0IID7|DUS10_BOVIN	92.523	214	14	1	22	235	271	482	1.41e-133	387
Mmel_00014072-RA	sp|O13157|GFRA2_CHICK	78.736	174	35	1	33	204	264	437	3.49e-97	293
Mmel_00014637-RA	sp|A0A1D5PXA5|TRPV4_CHICK	89.81	422	12	2	1	421	331	722	0	749
Mmel_00014638-RA	sp|A0A1D5PXA5|TRPV4_CHICK	75.573	131	9	2	16	123	722	852	3.48e-57	192
Mmel_00008147-RA	sp|P57075|UBS3A_HUMAN	45.926	540	181	9	3	431	119	658	9.91e-155	456
Mmel_00008146-RA	sp|P57075|UBS3A_HUMAN	81.013	79	15	0	11	89	40	118	3.79e-41	145
Mmel_00008148-RA	sp|Q8VIG3|RSPH1_MOUSE	62.555	227	84	1	17	242	16	242	6.03e-93	280
Mmel_00008149-RA	sp|P57057|G6PT2_HUMAN	61.65	412	98	5	9	361	13	423	2.69e-163	476
Mmel_00008152-RA	sp|O76083|PDE9A_HUMAN	89.109	202	22	0	69	270	362	563	1.04e-128	381
Mmel_00008151-RA	sp|O76083|PDE9A_HUMAN	83.099	71	12	0	23	93	147	217	3.08e-32	121
Mmel_00008157-RA	sp|Q58H57|CBS_MACFA	62.842	183	66	1	22	202	315	497	6.58e-77	246
Mmel_00008156-RA	sp|P55347|PKNX1_HUMAN	93.807	436	27	0	1	436	1	436	0	786
Mmel_00008154-RA	sp|P57081|WDR4_HUMAN	55.039	387	162	6	24	404	30	410	2.86e-148	429
Mmel_00008158-RA	sp|P35520|CBS_HUMAN	74.107	560	131	4	17	571	1	551	0	871
Mmel_00008160-RA	sp|P02504|CRYAA_CHICK	96	100	4	0	1	100	74	173	3.88e-66	199
Mmel_00008159-RA	sp|A1A4K8|U2AF1_BOVIN	90.132	152	15	0	70	221	35	186	2.62e-98	288
Mmel_00008161-RA	sp|Q9IA88|SIK2_CHICK	93.132	728	42	3	1	726	77	798	0	1288
Mmel_00008163-RA	sp|Q14684|RRP1B_HUMAN	43.968	746	304	21	1	687	62	752	1.42e-171	512
Mmel_00008164-RA	sp|Q8K183|PDXK_MOUSE	82.197	264	47	0	7	270	49	312	2.63e-165	463
Mmel_00008162-RA	sp|O75031|HSF2B_HUMAN	75.235	319	77	1	11	329	16	332	0	506
Mmel_00008167-RA	sp|P48553|TPC10_HUMAN	82.716	1215	209	1	1	1215	46	1259	0	2121
Mmel_00008168-RA	sp|Q5RFQ3|PWP2_PONAB	76.644	882	206	0	1	882	1	882	0	1451
Mmel_00008166-RA	sp|Q9NRZ7|PLCC_HUMAN	88.83	376	42	0	1	376	1	376	0	708
Mmel_00008169-RA	sp|Q9D172|ES1_MOUSE	80.816	245	39	3	18	258	26	266	9.05e-136	386
Mmel_00008171-RA	sp|O75144|ICOSL_HUMAN	34.728	239	142	5	19	255	18	244	4.43e-34	129
Mmel_00008174-RA	sp|Q9H7Y0|DIA1R_HUMAN	49.192	433	144	8	1	375	19	433	4.91e-126	372
Mmel_00008177-RA	sp|E1BWM5|FUND1_CHICK	98.63	146	2	0	1	146	11	156	9.92e-105	298
Mmel_00008176-RA	sp|O15550|KDM6A_HUMAN	87.447	709	67	4	7	714	214	901	0	1233
Mmel_00008175-RA	sp|O15550|KDM6A_HUMAN	87.398	492	19	1	1	449	902	1393	0	870
Mmel_00008178-RA	sp|Q32TG3|EFHC2_CHICK	67.531	733	222	3	30	747	15	746	0	966
Mmel_00008180-RA	sp|Q60HE4|NDP_MACFA	84	75	12	0	1	75	59	133	5.83e-40	130
Mmel_00008181-RA	sp|P49253|AOF_ONCMY	73.256	516	120	3	6	504	8	522	0	808
Mmel_00008183-RA	sp|Q5NU32|AOFA_HORSE	71.343	499	138	1	16	514	23	516	0	765
Mmel_00008185-RA	sp|O14936|CSKP_HUMAN	98.897	544	6	0	15	558	383	926	0	1130
Mmel_00008184-RA	sp|Q9R1K6|GPR34_MOUSE	58.158	380	152	7	12	389	1	375	4.12e-146	434
Mmel_00008187-RA	sp|P62919|RL8_RAT	98.658	149	2	0	62	210	109	257	2.42e-102	299
Mmel_00008186-RA	sp|P16381|DDX3L_MOUSE	79.455	477	35	5	1	416	186	660	0	693
Mmel_00008188-RA	sp|Q93008|USP9X_HUMAN	93.223	2538	113	3	10	2488	32	2569	0	4874
Mmel_00008189-RA	sp|O60244|MED14_HUMAN	85.988	1306	101	4	3	1238	73	1366	0	2261
Mmel_00008190-RA	sp|Q6AXS4|RENR_RAT	69.578	332	66	2	22	318	19	350	2.43e-170	479
Mmel_00011690-RA	sp|Q803I2|ERGI3_DANRE	83.088	136	23	0	1	136	84	219	1.6e-80	244
Mmel_00011691-RA	sp|Q9CQE7|ERGI3_MOUSE	92.208	154	12	0	1	154	230	383	1.48e-101	299
Mmel_00011697-RA	sp|A4QNF3|ROMO1_XENTR	96.203	79	3	0	1	79	1	79	6.96e-48	149
Mmel_00011695-RA	sp|Q8SQ27|RBM12_MACMU	79.506	932	138	3	11	889	1	932	0	1219
Mmel_00011696-RA	sp|Q9Y697|NFS1_HUMAN	78.086	397	36	1	1	346	61	457	0	635
Mmel_00011693-RA	sp|A3KGK3|FR1L4_MOUSE	53.885	1956	803	22	138	2070	109	1988	0	2070
Mmel_00011698-RA	sp|Q5RC80|RBM39_PONAB	97.901	524	9	1	1	522	1	524	0	1054
Mmel_00011694-RA	sp|D4A1R8|CPNE1_RAT	60.465	86	34	0	1	86	43	128	2.76e-30	114
Mmel_00011699-RA	sp|P59281|RHG39_MOUSE	44.213	1106	505	27	23	1043	29	1107	0	817
Mmel_00011702-RA	sp|Q9BVI0|PHF20_HUMAN	69.978	453	127	3	733	1176	560	1012	0	645
Mmel_00011703-RA	sp|A7MB28|NDRG3_BOVIN	73.714	350	83	3	16	364	31	372	0	513
Mmel_00014020-RA	sp|O93526|FGL1L_CHICK	50	194	94	2	50	241	38	230	2.82e-61	202
Mmel_00014021-RA	sp|O93526|FGL1L_CHICK	48.611	216	104	4	61	270	26	240	4.88e-67	213
Mmel_00014959-RA	sp|P23919|KTHY_HUMAN	62.745	102	38	0	1	102	111	212	3.56e-45	147
Mmel_00014794-RA	sp|Q2HJH1|DNPEP_BOVIN	75.542	323	75	3	1	323	86	404	6.42e-178	503
Mmel_00009948-RA	sp|Q0V7M4|SCMC2_BOVIN	91.045	469	28	1	1	455	1	469	0	893
Mmel_00009945-RA	sp|Q5T9C2|F102A_HUMAN	84.524	336	51	1	12	346	49	384	0	524
Mmel_00009949-RA	sp|Q8IZC6|CORA1_HUMAN	77.817	284	63	0	1	284	1529	1812	6.55e-134	419
Mmel_00009952-RA	sp|Q8BH27|MEGF9_MOUSE	68.182	198	49	2	10	207	417	600	1.14e-71	231
Mmel_00009953-RA	sp|Q8K389|CK5P2_MOUSE	38.616	1994	960	52	126	2046	19	1821	0	987
Mmel_00009954-RA	sp|Q7ZZR3|BRNP1_CHICK	97.254	619	4	1	1	606	143	761	0	1250
Mmel_00014346-RA	sp|Q5ZJD7|YIPF4_CHICK	94.783	230	9	1	17	246	22	248	1.06e-151	425
Mmel_00010562-RA	sp|C0HL12|AGRB1_RAT	68.182	528	86	6	2	526	282	730	0	724
Mmel_00010563-RA	sp|Q3UHD1|AGRB1_MOUSE	74.411	594	95	10	6	585	971	1521	0	809
Mmel_00010564-RA	sp|Q8AWC3|ARC_CHICK	96.287	404	15	0	1	404	1	404	0	812
Mmel_00014357-RA	sp|P36896|ACV1B_HUMAN	68.122	458	59	6	1	376	53	505	0	581
Mmel_00014799-RA	sp|Q96MU8|KREM1_HUMAN	77.734	256	57	0	1	256	117	372	2.56e-153	438
Mmel_00014850-RA	sp|Q9EQQ9|OGA_MOUSE	40.404	198	112	3	41	238	725	916	2.44e-34	133
Mmel_00011634-RA	sp|Q2YDN8|VRK3_BOVIN	58.974	273	111	1	1	272	179	451	1.99e-117	347
Mmel_00011635-RA	sp|P51944|CCNF_MOUSE	69.316	629	174	2	10	620	1	628	0	885
Mmel_00011633-RA	sp|Q8R420|ABCA3_MOUSE	63.679	636	173	4	119	702	2	631	0	815
Mmel_00011631-RA	sp|Q8R420|ABCA3_MOUSE	66.942	242	77	2	2	243	1294	1532	9.39e-103	333
Mmel_00011636-RA	sp|Q7L2K0|TEDC2_HUMAN	36.474	329	181	8	193	508	117	430	7.36e-36	141
Mmel_00011638-RA	sp|Q9W740|NOGG2_DANRE	65.957	141	44	2	1	140	75	212	7.05e-64	196
Mmel_00011637-RA	sp|Q8N957|ANKF1_HUMAN	59.669	362	145	1	1	362	340	700	1.44e-151	452
Mmel_00012945-RA	sp|Q9GKL7|ANDR_PIG	91.361	382	33	0	19	400	515	896	0	734
Mmel_00012950-RA	sp|Q6IQ85|YIPF6_DANRE	80.822	219	42	0	9	227	22	240	2.03e-133	378
Mmel_00012949-RA	sp|Q7YQL5|OPHN1_PONPY	80.193	727	133	6	28	745	51	775	0	1122
Mmel_00012404-RA	sp|Q8CJ00|NOXA1_MOUSE	42.763	152	87	0	17	168	59	210	1.42e-37	136
Mmel_00012403-RA	sp|Q8N9H8|MUT7_HUMAN	46.809	141	73	1	5	143	20	160	1.59e-27	110
Mmel_00012402-RA	sp|Q8N9H8|MUT7_HUMAN	47.303	482	207	10	3	482	293	729	1.72e-125	390
Mmel_00011884-RA	sp|Q14108|SCRB2_HUMAN	60.227	440	172	1	3	442	42	478	0	587
Mmel_00011885-RA	sp|P70582|NUP54_RAT	90.254	472	43	2	132	601	40	510	0	810
Mmel_00011891-RA	sp|Q6AXX4|SAS10_RAT	57.029	377	140	7	101	477	116	470	2.81e-129	386
Mmel_00011892-RA	sp|Q7L099|RUFY3_HUMAN	95.349	387	17	1	20	405	59	445	0	750
Mmel_00011890-RA	sp|P01591|IGJ_HUMAN	59.574	94	35	1	24	114	64	157	1.46e-34	119
Mmel_00011894-RA	sp|Q12849|GRSF1_HUMAN	54.192	334	134	6	25	344	136	464	4.23e-115	347
Mmel_00011887-RA	sp|O14830|PPE2_HUMAN	61.382	738	191	6	29	698	18	729	0	893
Mmel_00011889-RA	sp|Q9NVU7|SDA1_HUMAN	84.343	677	101	3	40	716	1	672	0	1162
Mmel_00011888-RA	sp|Q02083|NAAA_HUMAN	69.658	234	71	0	1	234	91	324	4.48e-125	362
Mmel_00011896-RA	sp|Q3MHR2|DCK_BOVIN	77.193	228	38	3	9	226	31	254	3.49e-126	363
Mmel_00011898-RA	sp|Q4U116|S4A4_PIG	79.143	1050	93	9	34	1016	77	1067	0	1546
Mmel_00011895-RA	sp|Q8BPB0|MOB1B_MOUSE	100	211	0	0	11	221	6	216	5.37e-161	446
Mmel_00012360-RA	sp|P14925|AMD_RAT	71.549	949	253	11	21	960	36	976	0	1390
Mmel_00012362-RA	sp|O43314|VIP2_HUMAN	77.604	768	83	7	313	993	432	1197	0	1145
Mmel_00012363-RA	sp|Q3ZBS1|CE030_BOVIN	83.333	186	31	0	8	193	22	207	9.7e-114	325
Mmel_00012361-RA	sp|Q4R6I1|GIN1_MACFA	65.665	466	152	5	70	528	1	465	0	634
Mmel_00015094-RA	sp|Q9H254|SPTN4_HUMAN	49.282	209	38	5	1	209	129	269	2.21e-50	178
Mmel_00014997-RA	sp|Q99LB0|TDIF1_MOUSE	83	100	16	1	1	100	67	165	5.43e-52	168
Mmel_00003978-RA	sp|Q5RCC4|KCC2A_PONAB	88.182	110	13	0	10	119	344	453	1.1e-64	206
Mmel_00003980-RA	sp|Q9DEB6|CDX1_CHICK	90	260	25	1	1	259	1	260	1.14e-160	449
Mmel_00003979-RA	sp|Q99884|SC6A7_HUMAN	73.948	618	86	6	8	608	12	571	0	852
Mmel_00003981-RA	sp|Q6QNF3|PGFRB_CANLF	66.856	1056	310	11	28	1068	33	1063	0	1375
Mmel_00003982-RA	sp|P13369|CSF1R_FELCA	34.316	373	240	4	3	374	199	567	7.97e-53	192
Mmel_00003984-RA	sp|Q9DDN6|NPY2R_CHICK	63.712	361	124	6	1	357	1	358	2.26e-148	427
Mmel_00003983-RA	sp|Q12766|HMGX3_HUMAN	75.194	645	157	2	566	1208	878	1521	0	1017
Mmel_00003986-RA	sp|P79701|VGFR3_COTCO	90.8	1250	70	2	13	1218	131	1379	0	2316
Mmel_00003994-RA	sp|Q812F8|MGT4B_MOUSE	86.667	435	37	2	2	434	33	448	0	775
Mmel_00003991-RA	sp|Q66K14|TBC9B_HUMAN	79.489	1214	216	9	7	1197	47	1250	0	1880
Mmel_00003990-RA	sp|Q6Y290|GOLI_RAT	77.778	72	16	0	4	75	316	387	2.05e-32	119
Mmel_00003989-RA	sp|Q86XS8|GOLI_HUMAN	77.974	227	31	1	1	227	75	282	1.21e-121	356
Mmel_00003993-RA	sp|Q64337|SQSTM_MOUSE	57.143	469	158	6	1	453	1	442	2.24e-177	506
Mmel_00004000-RA	sp|P31943|HNRH1_HUMAN	85.901	383	42	2	1	371	34	416	0	622
Mmel_00003998-RA	sp|Q2NKS0|LTC4S_BOVIN	65.385	104	36	0	1	104	1	104	3.98e-43	140
Mmel_00003996-RA	sp|Q92585|MAML1_HUMAN	59.509	936	336	13	1	920	107	1015	0	976
Mmel_00003999-RA	sp|Q3MHR2|DCK_BOVIN	63.158	266	92	2	1	266	1	260	1.06e-131	376
Mmel_00003995-RA	sp|Q60860|LTC4S_MOUSE	67.939	131	42	0	1	131	1	131	7.48e-61	187
Mmel_00003997-RA	sp|Q5R440|CALX_PONAB	81.494	589	93	5	1	587	1	575	0	927
Mmel_00004001-RA	sp|Q8BIJ7|RUFY1_MOUSE	84.641	599	91	1	1	598	114	712	0	1010
Mmel_00004003-RA	sp|P79331|ATS2_BOVIN	79.803	916	182	3	17	930	291	1205	0	1557
Mmel_00004006-RA	sp|Q9ULM6|CNOT6_HUMAN	85.637	557	21	2	1	498	1	557	0	966
Mmel_00004007-RA	sp|Q08DQ2|GFPT2_BOVIN	93.093	666	46	0	2	667	3	668	0	1298
Mmel_00004008-RA	sp|P45984|MK09_HUMAN	86.493	422	10	1	1	375	1	422	0	746
Mmel_00004009-RA	sp|Q8N431|RGF1C_HUMAN	82.03	473	77	3	3	474	1	466	0	803
Mmel_00004010-RA	sp|Q9HAZ1|CLK4_HUMAN	82.328	481	80	3	29	505	1	480	0	786
Mmel_00004011-RA	sp|Q86Y22|CONA1_HUMAN	51.648	182	34	3	1	128	139	320	5.56e-22	99.4
Mmel_00004012-RA	sp|Q8IUZ5|AT2L2_HUMAN	78.487	423	91	0	78	500	20	442	0	728
Mmel_00004014-RA	sp|P56597|NDK5_HUMAN	72.683	205	56	0	37	241	1	205	1.8e-115	332
Mmel_00004013-RA	sp|Q99729|ROAA_HUMAN	77.82	266	51	3	1	262	71	332	2e-123	357
Mmel_00004017-RA	sp|Q9NYF5|FA13B_HUMAN	73.618	959	166	12	59	974	1	915	0	1268
Mmel_00004015-RA	sp|P51030|WNT8C_CHICK	87.675	357	44	0	1	357	1	357	0	637
Mmel_00004018-RA	sp|Q9UBF9|MYOTI_HUMAN	58.614	534	175	8	1	524	1	498	0	605
Mmel_00004020-RA	sp|Q5REP9|KLHL3_PONAB	70.492	61	17	1	2	61	5	65	1.6e-22	91.7
Mmel_00004019-RA	sp|P79217|NPY6R_RABIT	76.271	118	28	0	2	119	247	364	6.12e-63	199
Mmel_00004021-RA	sp|Q9UH77|KLHL3_HUMAN	86.914	405	10	1	13	374	175	579	0	718
Mmel_00004022-RA	sp|Q08629|TICN1_HUMAN	92.181	243	19	0	20	262	197	439	7.19e-156	443
Mmel_00004023-RA	sp|Q9HCX4|TRPC7_HUMAN	95.736	258	11	0	1	258	10	267	4.02e-177	513
Mmel_00004024-RA	sp|Q9HCX4|TRPC7_HUMAN	90.955	398	36	0	1	398	386	783	0	762
Mmel_00004027-RA	sp|Q56I99|SMAD5_CHICK	99.785	465	1	0	1	465	1	465	0	968
Mmel_00004028-RA	sp|P55906|BGH3_BOVIN	77.273	638	115	2	4	611	46	683	0	1034
Mmel_00004029-RA	sp|P08940|MIM1_CHICK	80.299	335	50	6	1	331	1	323	0	519
Mmel_00004030-RA	sp|Q9UKT7|FBXL3_HUMAN	76.147	436	96	1	1	436	1	428	0	682
Mmel_00004032-RA	sp|Q6ZT89|S2548_HUMAN	67.416	89	29	0	1	89	184	272	1.78e-40	138
Mmel_00004034-RA	sp|O93327|H2AY_CHICK	90.75	400	9	1	1	400	1	372	0	714
Mmel_00004038-RA	sp|Q5R6D8|DDX46_PONAB	89.659	938	50	3	103	1007	109	1032	0	1594
Mmel_00004035-RA	sp|Q9DG45|PHS2_CHICK	96.61	59	2	0	13	71	45	103	4e-38	125
Mmel_00004036-RA	sp|Q5BJT4|TXD15_RAT	78.673	211	45	0	14	224	133	343	2.01e-121	351
Mmel_00004039-RA	sp|P49069|CAMLG_HUMAN	72.318	289	68	5	1	282	4	287	1.45e-144	410
Mmel_00004040-RA	sp|A6QNT8|SC24A_BOVIN	75.891	1066	232	11	7	1065	48	1095	0	1570
Mmel_00004037-RA	sp|Q7Z6I8|CE024_HUMAN	85.811	148	21	0	12	159	1	148	1.56e-91	267
Mmel_00004041-RA	sp|Q9CQC9|SAR1B_MOUSE	92.157	204	8	1	2	205	3	198	7.22e-138	386
Mmel_00004042-RA	sp|Q9NQC1|JADE2_HUMAN	59.27	685	168	14	2	604	135	790	0	706
Mmel_00004044-RA	sp|P63149|UBE2B_RAT	100	138	0	0	6	143	15	152	5.81e-100	286
Mmel_00004046-RA	sp|Q71U00|SKP1_XENLA	100	163	0	0	1	163	1	163	6.36e-117	330
Mmel_00004045-RA	sp|P67777|PP2AA_RABIT	99.638	276	1	0	4	279	34	309	0	580
Mmel_00004049-RA	sp|Q5R5B8|KCT2_PONAB	50.249	201	75	6	42	233	81	265	2.87e-57	185
Mmel_00004048-RA	sp|P21796|VDAC1_HUMAN	93.286	283	19	0	2	284	1	283	0	549
Mmel_00004050-RA	sp|Q6MZW2|FSTL4_HUMAN	73.077	546	147	0	19	564	297	842	0	855
Mmel_00004052-RA	sp|Q8TEU7|RPGF6_HUMAN	78.408	1445	233	13	65	1482	209	1601	0	2182
Mmel_00004054-RA	sp|Q5W4S4|FNIP1_CHICK	90.647	1112	62	2	4	1101	74	1157	0	2034
Mmel_00004055-RA	sp|Q5W4S4|FNIP1_CHICK	100	42	0	0	3	44	32	73	9.64e-23	92.4
Mmel_00004058-RA	sp|Q9UKU0|ACSL6_HUMAN	86.529	631	74	1	1	620	64	694	0	1143
Mmel_00004062-RA	sp|Q9PW72|PDLI4_CHICK	82.805	221	38	0	9	229	110	330	6.2e-136	387
Mmel_00004061-RA	sp|Q5ZLK5|P4HA2_CHICK	90.253	554	24	3	53	603	8	534	0	1021
Mmel_00004063-RA	sp|O76082|S22A5_HUMAN	77.104	511	117	0	468	978	47	557	0	834
Mmel_00004064-RA	sp|Q90876|IRF1_CHICK	81.132	318	54	3	1	317	1	313	0	540
Mmel_00004065-RA	sp|Q92878|RAD50_HUMAN	76.601	1312	307	0	1	1312	1	1312	0	2043
Mmel_00004068-RA	sp|B1H120|SEPT8_XENTR	87.29	417	30	1	8	401	11	427	0	750
Mmel_00004067-RA	sp|Q4R628|KIF3A_MACFA	90.382	707	44	2	1	704	1	686	0	1295
Mmel_00004069-RA	sp|Q8BLS7|SWAHA_MOUSE	46.471	170	81	3	1	160	360	529	1.14e-42	152
Mmel_00004072-RA	sp|A2T767|PTTG1_PANTR	37.879	198	75	8	1	153	1	195	4.88e-27	103
Mmel_00004070-RA	sp|Q01613|SHRM1_XENLA	46.205	303	129	5	117	402	1134	1419	3.61e-73	251
Mmel_00004071-RA	sp|Q5ZIG2|SLU7_CHICK	91.135	564	20	1	8	541	1	564	0	1064
Mmel_00004074-RA	sp|O94823|AT10B_HUMAN	67.757	1039	304	13	31	1045	157	1188	0	1409
Mmel_00004073-RA	sp|O94823|AT10B_HUMAN	46.36	261	119	2	1	257	1199	1442	9.2e-72	242
Mmel_00004075-RA	sp|D1LYT2|GBRB2_MACMU	96.648	179	6	0	5	183	182	360	6.43e-123	360
Mmel_00004076-RA	sp|P0C2W5|GBRB2_BOVIN	100	74	0	0	6	79	78	151	6.35e-47	158
Mmel_00004078-RA	sp|Q90845|GBRA6_CHICK	84.235	425	16	1	3	427	76	449	0	729
Mmel_00004079-RA	sp|P19150|GBRA1_CHICK	98.901	455	5	0	5	459	1	455	0	938
Mmel_00004081-RA	sp|Q5REA1|GBRG2_PONAB	98.592	213	3	0	3	215	255	467	1.7e-155	441
Mmel_00004080-RA	sp|P21548|GBRG2_CHICK	97.26	219	6	0	3	221	37	255	3.43e-160	454
Mmel_00004084-RA	sp|P51959|CCNG1_HUMAN	82.353	204	36	0	1	204	89	292	1.6e-122	351
Mmel_00004083-RA	sp|Q5M823|NUDC2_RAT	78.571	126	19	1	5	122	32	157	8.12e-72	214
Mmel_00004085-RA	sp|Q99LB6|MAT2B_MOUSE	87.22	313	40	0	4	316	22	334	0	586
Mmel_00004087-RA	sp|Q9DER5|TEN2_CHICK	85.35	157	18	1	9	165	462	613	3.82e-84	273
Mmel_00004089-RA	sp|Q9DER5|TEN2_CHICK	97.08	1918	49	1	16	1926	885	2802	0	3877
Mmel_00004090-RA	sp|Q8IX03|KIBRA_HUMAN	76.661	1084	238	7	61	1140	41	1113	0	1472
Mmel_00004091-RA	sp|Q5ZM11|SYRC_CHICK	92.736	647	47	0	39	685	15	661	0	1265
Mmel_00004092-RA	sp|A7E300|RHG07_BOVIN	46.339	874	396	20	23	858	37	875	0	660
Mmel_00004094-RA	sp|O88280|SLIT3_RAT	69.9	299	83	2	1	294	1227	1523	5.63e-145	446
Mmel_00004093-RA	sp|Q08DA5|PANK3_BOVIN	96.399	361	13	0	9	369	10	370	0	723
Mmel_00004095-RA	sp|O88280|SLIT3_RAT	84.444	45	7	0	3	47	1060	1104	1.6e-21	89
Mmel_00004096-RA	sp|O88280|SLIT3_RAT	84.393	173	27	0	29	201	486	658	4.35e-98	313
Mmel_00004097-RA	sp|Q9WVB4|SLIT3_MOUSE	77.215	79	18	0	15	93	187	265	2.03e-35	130
Mmel_00004101-RA	sp|A6NMK8|F196B_HUMAN	51.188	547	230	13	21	542	1	535	3.01e-146	434
Mmel_00004099-RA	sp|Q92608|DOCK2_HUMAN	75.287	785	90	7	5	723	9	755	0	1146
Mmel_00004104-RA	sp|Q7ZYQ0|FXI1E_XENLA	79.144	374	76	2	1	374	1	372	0	605
Mmel_00004098-RA	sp|Q96EA4|SPDLY_HUMAN	57.61	611	249	6	35	641	1	605	0	608
Mmel_00004103-RA	sp|Q92608|DOCK2_HUMAN	72.775	573	116	4	1	537	1253	1821	0	840
Mmel_00004100-RA	sp|Q8C3J5|DOCK2_MOUSE	95.652	46	2	0	1	46	770	815	1.58e-22	90.9
Mmel_00004102-RA	sp|Q92608|DOCK2_HUMAN	86.102	295	30	1	1	295	940	1223	7.15e-175	532
Mmel_00004106-RA	sp|Q13094|LCP2_HUMAN	45.588	544	198	12	1	458	1	532	8.86e-127	381
Mmel_00004108-RA	sp|Q5NVI3|RED_PONAB	84.877	529	12	3	15	475	29	557	0	868
Mmel_00014208-RA	sp|Q4FZY0|EFHD2_RAT	93.382	136	9	0	1	136	103	238	6.46e-78	233
Mmel_00014047-RA	sp|Q91770|NOT2_XENLA	73.684	114	23	3	8	119	108	216	1.7e-49	160
Mmel_00014049-RA	sp|Q5ZIZ2|SMYD5_CHICK	95.987	299	12	0	117	415	122	420	0	587
Mmel_00014046-RA	sp|Q5ZJK8|TCPH_CHICK	70	260	23	2	12	216	146	405	9.21e-117	347
Mmel_00014048-RA	sp|Q5ZJK8|TCPH_CHICK	99.329	149	1	0	1	149	1	149	5.89e-99	297
Mmel_00014809-RA	sp|Q6PB90|PCDBE_MOUSE	50	502	249	2	1	501	90	590	1.11e-178	524
Mmel_00014943-RA	sp|Q7Z6J4|FGD2_HUMAN	68.456	149	47	0	1	149	195	343	8.72e-69	222
Mmel_00010275-RA	sp|Q8QFN3|TM121_CHICK	71.484	256	73	0	1	256	19	274	2.28e-143	408
Mmel_00010276-RA	sp|A6QNR1|RRP36_BOVIN	66.038	159	54	0	1	159	84	242	2.08e-65	202
Mmel_00010274-RA	sp|Q6VY07|PACS1_HUMAN	54.437	586	227	9	19	583	199	765	0	561
Mmel_00010277-RA	sp|Q58CV6|KLDC3_BOVIN	76.267	375	55	2	1	341	1	375	0	601
Mmel_00010278-RA	sp|Q5FVH7|MEA1_RAT	56.731	104	19	2	2	105	92	169	6.32e-29	105
Mmel_00010281-RA	sp|Q5ZIN0|ABD12_CHICK	90.169	356	24	4	41	385	13	368	0	650
Mmel_00010282-RA	sp|P11216|PYGB_HUMAN	83.383	337	56	0	139	475	507	843	0	605
Mmel_00010280-RA	sp|Q28653|2A5D_RABIT	93.116	552	31	1	19	570	42	586	0	1057
Mmel_00010284-RA	sp|O75354|ENTP6_HUMAN	65.986	441	145	2	1	436	38	478	0	619
Mmel_00010286-RA	sp|Q9QXF8|GNMT_MOUSE	75	156	36	1	10	162	137	292	5.17e-83	249
Mmel_00010289-RA	sp|A6QLW8|S22A7_BOVIN	53.947	532	229	5	1	520	1	528	0	567
Mmel_00010285-RA	sp|Q13608|PEX6_HUMAN	82.414	290	48	1	7	293	690	979	1.11e-153	457
Mmel_00010287-RA	sp|Q9H9Y6|RPA2_HUMAN	74.387	1019	260	1	20	1037	116	1134	0	1651
Mmel_00010288-RA	sp|Q8NG68|TTL_HUMAN	87.692	325	39	1	1	325	54	377	0	595
Mmel_00010291-RA	sp|Q6PCN3|TTBK1_MOUSE	68.72	211	49	6	1	201	479	682	1.54e-75	253
Mmel_00010292-RA	sp|Q5TCY1|TTBK1_HUMAN	82.6	523	39	3	1	519	1	475	0	883
Mmel_00010293-RA	sp|Q99NB1|ACS2L_MOUSE	60.103	584	136	4	2	521	130	680	0	696
Mmel_00010295-RA	sp|Q8WYP3|RIN2_HUMAN	87.931	406	47	1	364	769	487	890	0	756
Mmel_00010296-RA	sp|Q9HC58|NCKX3_HUMAN	62.716	464	55	6	8	411	239	644	0	532
Mmel_00010298-RA	sp|Q8NHU2|CFA61_HUMAN	51.698	648	278	5	1	618	1	643	0	652
Mmel_00010299-RA	sp|Q8NHU2|CFA61_HUMAN	70.455	88	25	1	17	103	690	777	2.06e-36	133
Mmel_00010302-RA	sp|Q5ZK13|KIZ_CHICK	37.647	255	112	9	136	375	342	564	3.72e-26	113
Mmel_00010303-RA	sp|Q5ZIP4|XRN2_CHICK	91.951	907	57	3	10	901	25	930	0	1701
Mmel_00010300-RA	sp|Q2PPJ7|RGPA2_HUMAN	72.556	1800	352	11	12	1671	36	1833	0	2647
Mmel_00014523-RA	sp|Q8QZR7|PDK1L_MOUSE	88.623	334	20	2	1	316	8	341	0	610
Mmel_00014511-RA	sp|Q9BQE9|BCL7B_HUMAN	93.269	104	7	0	23	126	89	192	1.82e-55	174
Mmel_00012876-RA	sp|Q80ZU7|BPIB3_MOUSE	29.975	397	239	12	21	397	87	464	2.3e-29	122
Mmel_00012877-RA	sp|P59827|BPIB4_HUMAN	39.355	155	93	1	269	423	227	380	1.95e-25	112
Mmel_00012872-RA	sp|Q6V291|MARE1_COTCO	93.916	263	16	0	1	263	1	263	0	513
Mmel_00012875-RA	sp|O42273|TENP_CHICK	54.176	443	169	5	44	458	1	437	2.74e-140	412
Mmel_00012870-RA	sp|Q3MHX1|COMD7_BOVIN	79.851	134	27	0	4	137	29	162	1.58e-74	223
Mmel_00012878-RA	sp|Q96SZ6|CK5P1_HUMAN	76.218	513	93	2	6	504	102	599	0	808
Mmel_00014852-RA	sp|Q95MH6|GNRR2_CHLAE	53.182	220	81	6	22	225	6	219	8.46e-58	190
Mmel_00014927-RA	sp|Q8BIV7|S45A1_MOUSE	87.603	121	15	0	1	121	543	663	1.1e-69	226
Mmel_00014807-RA	sp|Q68E01|INT3_HUMAN	90.96	177	10	1	1	171	208	384	2.7e-109	337
Mmel_00013771-RA	sp|Q8TCU4|ALMS1_HUMAN	43.252	326	142	9	19	335	3873	4164	1.25e-73	250
Mmel_00013146-RA	sp|Q7L7X3|TAOK1_HUMAN	96.15	1013	27	2	1	1013	1	1001	0	2013
Mmel_00013143-RA	sp|P11843|CRBA1_BOVIN	93.333	90	6	0	1	90	126	215	6.87e-60	184
Mmel_00013144-RA	sp|Q7Z417|NUFP2_HUMAN	79.082	588	114	5	1	582	94	678	0	922
Mmel_00013171-RA	sp|Q9R229|BMP10_MOUSE	66.434	286	93	3	1	285	1	284	7.26e-137	397
Mmel_00013170-RA	sp|Q29TV8|GKN2_RAT	40	175	100	4	5	175	6	179	3.85e-35	124
Mmel_00013175-RA	sp|Q5ZLH4|TM230_CHICK	98.333	120	2	0	1	120	1	120	6.92e-79	230
Mmel_00013172-RA	sp|Q8BYW1|RHG25_MOUSE	57.551	490	194	7	1	484	166	647	0	536
Mmel_00013174-RA	sp|Q99L43|CDS2_MOUSE	77.143	315	32	5	27	302	130	443	1.07e-167	475
Mmel_00013164-RA	sp|Q9H6X2|ANTR1_HUMAN	75.814	215	29	1	1	192	1	215	4.1e-108	323
Mmel_00014107-RA	sp|O43182|RHG06_HUMAN	46.352	233	109	3	12	231	250	479	9.37e-45	164
Mmel_00014344-RA	sp|Q8R3L2|TCF25_MOUSE	58.173	624	243	8	24	641	65	676	0	681
Mmel_00010897-RA	sp|O43497|CAC1G_HUMAN	80.565	283	13	1	4	244	1265	1547	7.01e-135	423
Mmel_00010899-RA	sp|O15438|MRP3_HUMAN	69.16	1524	453	6	24	1542	16	1527	0	2187
Mmel_00010898-RA	sp|O43497|CAC1G_HUMAN	68.944	322	41	5	18	306	1637	1932	3.65e-109	354
Mmel_00010900-RA	sp|Q5SUE8|ANR40_MOUSE	54.799	323	133	5	4	318	46	363	7.43e-104	311
Mmel_00010903-RA	sp|Q8TEU8|WFKN2_HUMAN	77.96	549	118	2	16	561	28	576	0	920
Mmel_00010901-RA	sp|Q3SX41|LC7L3_BOVIN	97.454	432	11	0	1	432	1	432	0	832
Mmel_00010902-RA	sp|Q6AI12|ANR40_HUMAN	52.66	376	156	6	1	362	1	368	5.59e-118	349
Mmel_00010904-RA	sp|P50616|TOB1_HUMAN	89.565	345	12	3	1	321	1	345	0	546
Mmel_00010905-RA	sp|Q58A65|JIP4_MOUSE	74.359	1092	129	13	53	996	196	1284	0	1555
Mmel_00010911-RA	sp|Q9HCM9|TRI39_HUMAN	25.793	473	281	14	243	690	89	516	5.5e-35	142
Mmel_00010910-RA	sp|Q5SSI6|UTP18_MOUSE	55.22	431	175	5	54	480	81	497	1.39e-154	454
Mmel_00010907-RA	sp|O57535|NDK_CHICK	94.118	153	9	0	167	319	1	153	6.36e-106	308
Mmel_00010909-RA	sp|Q05BQ5|MBTD1_HUMAN	93.492	630	39	1	21	650	1	628	0	1152
Mmel_00010912-RA	sp|Q5ZKH4|NDEL1_CHICK	88.254	315	6	1	14	297	1	315	0	550
Mmel_00010914-RA	sp|P35580|MYH10_HUMAN	86.226	1786	104	8	32	1675	191	1976	0	2845
Mmel_00010915-RA	sp|Q27991|MYH10_BOVIN	95.652	115	5	0	1	115	1	115	3.46e-73	240
Mmel_00008582-RA	sp|Q5T6F2|UBAP2_HUMAN	79.259	270	53	1	19	288	822	1088	2.07e-135	413
Mmel_00008583-RA	sp|Q29503|UB2R2_RABIT	96.753	154	5	0	32	185	85	238	3.84e-105	304
Mmel_00008585-RA	sp|Q5M7P5|NOL6_XENTR	66.836	787	246	4	2	774	360	1145	0	1077
Mmel_00008587-RA	sp|Q08DE6|AQP3_BOVIN	80.612	294	55	1	1	294	1	292	2.86e-177	493
Mmel_00008584-RA	sp|Q6NRY2|NOL6_XENLA	73.006	163	44	0	2	164	81	243	5.62e-79	256
Mmel_00008588-RA	sp|P82143|PLIGB_GLOBS	34.031	191	122	4	1	188	1	190	2.21e-26	103
Mmel_00008589-RA	sp|Q4R691|AQP7_MACFA	49.275	276	137	2	1	276	22	294	2.18e-88	269
Mmel_00008590-RA	sp|Q68CL5|TPGS2_HUMAN	77.011	261	59	1	10	270	14	273	4.19e-150	425
Mmel_00008591-RA	sp|Q86T90|K1328_HUMAN	79.07	86	18	0	1	86	66	151	1.42e-34	126
Mmel_00011524-RA	sp|Q6DJC8|TM53B_XENLA	52.301	239	109	2	8	245	34	268	5.6e-86	260
Mmel_00011523-RA	sp|P70096|KIF2C_CRIGR	69.663	712	208	6	9	716	8	715	0	1006
Mmel_00011522-RA	sp|P62243|RS8_RAT	98.068	207	4	0	52	258	2	208	6.38e-149	417
Mmel_00011525-RA	sp|A6QLH5|ERI3_BOVIN	97.802	91	2	0	11	101	163	253	1.17e-58	186
Mmel_00011526-RA	sp|Q9JI44|DMAP1_MOUSE	95.439	285	13	0	48	332	43	327	0	572
Mmel_00015025-RA	sp|Q5E960|S39A3_BOVIN	71.875	96	27	0	1	96	219	314	8.05e-40	136
Mmel_00012840-RA	sp|Q91ZV2|DCBD2_RAT	70.799	613	160	5	16	614	142	749	0	893
Mmel_00011162-RA	sp|Q9UBG0|MRC2_HUMAN	55.629	453	88	6	1	343	38	487	6.93e-153	470
Mmel_00011161-RA	sp|Q9UBG0|MRC2_HUMAN	59.914	232	75	2	7	220	878	1109	5.49e-89	294
Mmel_00011166-RA	sp|Q6GM22|RPRML_XENLA	84.884	86	13	0	2	87	27	112	1.03e-49	155
Mmel_00011163-RA	sp|Q86UE8|TLK2_HUMAN	91.688	782	21	2	5	764	1	760	0	1455
Mmel_00011164-RA	sp|Q5ZHP8|METL2_CHICK	74.691	324	43	2	4	288	32	355	9.17e-171	479
Mmel_00011165-RA	sp|O54890|ITB3_MOUSE	79.221	231	47	1	22	251	28	258	8.11e-128	384
Mmel_00011167-RA	sp|Q90812|CRFR1_CHICK	98.404	376	6	0	23	398	45	420	0	771
Mmel_00011168-RA	sp|Q16515|ASIC2_HUMAN	78.922	204	40	1	1	204	1	201	3.38e-113	337
Mmel_00011169-RA	sp|P05106|ITB3_HUMAN	47.86	257	43	4	45	301	260	425	3.52e-59	205
Mmel_00014765-RA	sp|Q04678|SSRP1_CHICK	97.509	281	7	0	131	411	257	537	0	564
Mmel_00014595-RA	sp|Q63155|DCC_RAT	55	120	52	1	56	173	697	816	3.52e-34	130
Mmel_00001900-RA	sp|P35292|RAB17_MOUSE	52.518	139	49	2	3	124	54	192	9.32e-46	151
Mmel_00001903-RA	sp|Q6GNW0|LRRF2_XENLA	61.441	236	88	1	1	233	312	547	5.29e-78	269
Mmel_00001904-RA	sp|E1BC15|RBM44_BOVIN	31.304	345	157	12	193	460	466	807	4.17e-26	117
Mmel_00001906-RA	sp|B4ER10|IFNL3_CHICK	45.946	185	92	2	182	358	1	185	1.01e-48	165
Mmel_00001905-RA	sp|Q5ZKX6|UBE2F_CHICK	95.455	44	2	0	1	44	51	94	1.55e-25	95.9
Mmel_00001908-RA	sp|P07589|FINC_BOVIN	79.965	2286	405	10	1	2272	210	2456	0	3738
Mmel_00001907-RA	sp|P07589|FINC_BOVIN	95.604	91	4	0	1	91	95	185	7.59e-58	194
Mmel_00001909-RA	sp|P31335|PUR9_CHICK	84.983	586	36	1	47	580	8	593	0	1016
Mmel_00001910-RA	sp|Q86UK0|ABCAC_HUMAN	60.61	1409	467	10	1162	2517	934	2307	0	1749
Mmel_00001911-RA	sp|Q99728|BARD1_HUMAN	39.541	741	332	19	2	646	55	775	1.09e-159	481
Mmel_00001912-RA	sp|Q95K75|VWC2L_MACFA	93.846	130	8	0	8	137	1	130	2.32e-87	254
Mmel_00001913-RA	sp|Q8N0X2|SPG16_HUMAN	53.719	242	109	1	42	283	64	302	1.32e-83	268
Mmel_00001914-RA	sp|P81183|IKZF2_MOUSE	96.667	60	1	1	107	165	136	195	3.73e-33	128
Mmel_00001915-RA	sp|P81183|IKZF2_MOUSE	86.119	353	49	0	37	389	173	525	0	642
Mmel_00001918-RA	sp|Q15303|ERBB4_HUMAN	83.534	249	29	4	20	258	1062	1308	6.25e-135	414
Mmel_00001916-RA	sp|Q62956|ERBB4_RAT	96.407	167	6	0	54	220	208	374	1.15e-109	345
Mmel_00001917-RA	sp|Q15303|ERBB4_HUMAN	83.163	196	33	0	1	196	376	571	1.37e-114	357
Mmel_00001919-RA	sp|P31327|CPSM_HUMAN	66.938	614	119	2	18	547	887	1500	0	848
Mmel_00001923-RA	sp|O43813|LANC1_HUMAN	85.235	149	22	0	15	163	227	375	4.16e-93	278
Mmel_00001920-RA	sp|P07756|CPSM_RAT	77.17	622	93	4	4	619	317	895	0	965
Mmel_00001921-RA	sp|P31327|CPSM_HUMAN	74.882	211	52	1	10	219	1	211	3.05e-106	337
Mmel_00001924-RA	sp|P02604|MLE1_CHICK	86.243	189	24	2	31	217	1	189	1.34e-92	272
Mmel_00001925-RA	sp|P79274|ACADL_PIG	85.213	399	59	0	58	456	32	430	0	728
Mmel_00001927-RA	sp|Q96AT9|RPE_HUMAN	94.118	187	11	0	37	223	42	228	2.83e-132	374
Mmel_00001926-RA	sp|A0AUZ9|KAL1L_HUMAN	49.112	957	401	20	27	939	21	935	0	754
Mmel_00001930-RA	sp|P11137|MTAP2_HUMAN	98.113	106	2	0	3	108	1720	1825	1.48e-64	214
Mmel_00001928-RA	sp|Q8N2C7|UNC80_HUMAN	97.967	246	5	0	58	303	1624	1869	7.57e-164	508
Mmel_00001929-RA	sp|Q8N2C7|UNC80_HUMAN	84.586	266	40	1	1	265	48	313	4.38e-141	441
Mmel_00001931-RA	sp|P11137|MTAP2_HUMAN	61.613	1240	401	22	577	1798	509	1691	0	1272
Mmel_00001932-RA	sp|Q9Y2A7|NCKP1_HUMAN	96.062	1092	15	5	3	1066	37	1128	0	2163
Mmel_00001934-RA	sp|Q8NFH5|NUP35_HUMAN	81.029	311	52	3	1	306	18	326	0	507
Mmel_00001933-RA	sp|Q8WTR2|DUS19_HUMAN	78.125	160	34	1	1	159	43	202	3.81e-92	270
Mmel_00001936-RA	sp|Q6YNR6|S100B_RABIT	84.783	92	14	0	1	92	1	92	6.46e-53	162
Mmel_00001935-RA	sp|P48449|ERG7_HUMAN	79.082	588	123	0	20	607	144	731	0	1010
Mmel_00001939-RA	sp|O95613|PCNT_HUMAN	39.07	1226	611	28	3320	4481	2169	3322	0	670
Mmel_00001941-RA	sp|O15229|KMO_HUMAN	65.584	462	122	3	9	433	9	470	0	642
Mmel_00001942-RA	sp|P32592|ITB2_BOVIN	60.179	447	121	5	2	391	24	470	0	532
Mmel_00001944-RA	sp|P51400|RED1_RAT	79.437	462	75	4	119	560	249	710	0	763
Mmel_00001948-RA	sp|Q7Z570|Z804A_HUMAN	39.745	1019	562	25	16	1022	86	1064	0	575
Mmel_00001951-RA	sp|P26008|ITAV_CHICK	87.805	943	61	3	3	894	95	1034	0	1643
Mmel_00001950-RA	sp|Q5H7N8|ZC3HF_CHICK	94.545	385	20	1	21	405	29	412	0	664
Mmel_00001952-RA	sp|Q6P995|F171B_HUMAN	71.562	749	202	5	1	741	81	826	0	1069
Mmel_00001953-RA	sp|Q16602|CALRL_HUMAN	84.279	458	69	2	35	492	7	461	0	780
Mmel_00001954-RA	sp|P10646|TFPI1_HUMAN	48.56	243	91	3	34	243	34	275	2.72e-69	220
Mmel_00001956-RA	sp|Q9UBP9|GULP1_HUMAN	94.144	222	13	0	13	234	30	251	4.7e-152	427
Mmel_00001960-RA	sp|P12105|CO3A1_CHICK	90.809	272	25	0	994	1265	991	1262	2.73e-161	518
Mmel_00001962-RA	sp|Q3U821|WDR75_MOUSE	57.536	763	291	8	1	734	72	830	0	875
Mmel_00001961-RA	sp|Q3U962|CO5A2_MOUSE	94.424	538	30	0	118	655	484	1021	0	692
Mmel_00001964-RA	sp|Q5ZJN0|ASND1_CHICK	75.321	624	152	1	64	685	10	633	0	943
Mmel_00001965-RA	sp|Q4V7F3|OSGP2_RAT	65.686	408	140	0	1	408	4	411	0	557
Mmel_00001966-RA	sp|Q5R8X5|ORML1_PONAB	96	150	6	0	24	173	4	153	7.52e-106	302
Mmel_00001963-RA	sp|Q9JHI9|S40A1_MOUSE	78.333	540	105	6	1	538	41	570	0	854
Mmel_00001967-RA	sp|P54277|PMS1_HUMAN	50.198	759	348	7	20	765	190	931	0	696
Mmel_00001968-RA	sp|O42220|GDF8_CHICK	95.312	384	9	1	1	384	1	375	0	759
Mmel_00001974-RA	sp|Q6ZSS7|MFSD6_HUMAN	86.301	438	59	1	111	547	302	739	0	800
Mmel_00001975-RA	sp|Q5ZJY9|NEMP2_CHICK	76.683	416	97	0	4	419	32	447	0	644
Mmel_00001972-RA	sp|Q5ZJ60|HIBCH_CHICK	90	240	24	0	1	240	146	385	7.23e-159	452
Mmel_00001973-RA	sp|Q5ZJ60|HIBCH_CHICK	75.556	135	33	0	2	136	11	145	4.64e-71	220
Mmel_00001976-RA	sp|Q13506|NAB1_HUMAN	83.597	506	56	7	6	503	1	487	0	846
Mmel_00001979-RA	sp|Q14765|STAT4_HUMAN	77.493	742	114	4	1	690	1	741	0	1179
Mmel_00001980-RA	sp|O43795|MYO1B_HUMAN	90.316	950	71	1	41	969	187	1136	0	1773
Mmel_00001981-RA	sp|Q925K9|TSSK6_MOUSE	64.762	210	69	2	42	247	3	211	2.61e-95	283
Mmel_00001982-RA	sp|Q96AH0|SOSB2_HUMAN	72.667	150	39	1	1	150	1	148	1.05e-75	227
Mmel_00001983-RA	sp|O95810|CAVN2_HUMAN	60.968	310	113	5	1	304	118	425	6.33e-106	318
Mmel_00001986-RA	sp|Q28H51|BIR51_XENTR	57.143	140	59	1	11	149	11	150	4.77e-55	174
Mmel_00001984-RA	sp|Q6P5F6|S39AA_MOUSE	67.13	864	247	11	42	899	1	833	0	1043
Mmel_00001987-RA	sp|O94768|ST17B_HUMAN	71.622	370	100	2	9	373	1	370	0	538
Mmel_00001988-RA	sp|Q9P2P5|HECW2_HUMAN	85.27	1446	195	8	15	1450	135	1572	0	2529
Mmel_00001989-RA	sp|Q9Y5Q9|TF3C3_HUMAN	80.756	873	86	2	9	828	43	886	0	1424
Mmel_00001991-RA	sp|Q75T13|PGAP1_HUMAN	57.456	912	308	10	15	848	13	922	0	1021
Mmel_00001992-RA	sp|Q5F478|ANR44_CHICK	90.205	439	25	1	20	458	551	971	0	797
Mmel_00001994-RA	sp|Q5F478|ANR44_CHICK	98.532	477	7	0	48	524	10	486	0	976
Mmel_00001993-RA	sp|Q5F478|ANR44_CHICK	97.826	46	1	0	1	46	506	551	1.61e-24	99.4
Mmel_00001999-RA	sp|Q9W6X3|CH10_ORYLA	81.69	71	13	0	1	71	29	99	8.28e-37	121
Mmel_00001996-RA	sp|Q9H8M1|CQ10B_HUMAN	79.227	207	38	1	39	240	32	238	2.24e-123	352
Mmel_00001995-RA	sp|O75533|SF3B1_HUMAN	99.382	1295	5	3	18	1309	10	1304	0	2652
Mmel_00001998-RA	sp|Q5ZL72|CH60_CHICK	98.08	573	11	0	1	573	1	573	0	1120
Mmel_00002000-RA	sp|Q9QYW3|PHOCN_RAT	96.512	86	3	0	70	155	140	225	5.7e-53	170
Mmel_00002001-RA	sp|Q52LD8|RFTN2_HUMAN	69.727	512	130	7	9	508	1	499	0	726
Mmel_00002002-RA	sp|Q8WP23|BOLL_MACFA	71.206	257	59	3	12	267	1	243	5.53e-120	347
Mmel_00002003-RA	sp|Q15111|PLCL1_HUMAN	88.687	937	106	0	1	937	99	1035	0	1753
Mmel_00002004-RA	sp|Q8N8R5|CB069_HUMAN	70.803	274	75	4	1	274	117	385	2.09e-140	403
Mmel_00002005-RA	sp|E1C7T6|TYW5_CHICK	91.883	308	25	0	3	310	11	318	0	590
[truncated: 10,542 more rows]
