# Supplementary material for: A high-quality genome assembly of the North American Song Sparrow, Melospiza melodia
Source: bioRxiv preprint, doi:10.1101/850990, version 2 (2019-11-23)
Supplement: Supplementary File S20 [file 850990_file22.xlsx]

## Sheet: File_S20_InterProScan_output
Gene name	Sequence md5 digest	Seq len	Analysis	Signature Accession	Signature description	Start	Stop	E-value	score	Date	Interproscan accession	Interproscan annotations	GO annotations	Pathway annotations
Mmel_00014707-RA	dfab5dd270b89a4c16bedcff2a1ac05f	587	Pfam	PF15787	Domain of unknown function (DUF4704)	13	146	8.2e-14	T	31-10-2019	IPR031570	Domain of unknown function DUF4704
Mmel_00013738-RA	0409b0fb997d719788a58da796a540c2	1106	Pfam	PF14938	Soluble NSF attachment protein, SNAP	847	967	2.1e-06	T	31-10-2019
Mmel_00013738-RA	0409b0fb997d719788a58da796a540c2	1106	Pfam	PF07653	Variant SH3 domain	198	249	2.2e-05	T	31-10-2019	IPR001452	SH3 domain	GO:0005515
Mmel_00006666-RA	d16698d9deb5a8f122b81daa715e97ba	427	Pfam	PF13516	Leucine Rich repeat	239	256	0.077	T	31-10-2019	IPR001611	Leucine-rich repeat	GO:0005515
Mmel_00006666-RA	d16698d9deb5a8f122b81daa715e97ba	427	Pfam	PF13516	Leucine Rich repeat	180	193	0.06	T	31-10-2019	IPR001611	Leucine-rich repeat	GO:0005515
Mmel_00005026-RA	2740eb167ceba46e355e6112f3fed50c	290	Pfam	PF13637	Ankyrin repeats (many copies)	66	117	1.2e-10	T	31-10-2019
Mmel_00005026-RA	2740eb167ceba46e355e6112f3fed50c	290	Pfam	PF12796	Ankyrin repeats (3 copies)	134	224	4.3e-15	T	31-10-2019	IPR020683	Ankyrin repeat-containing domain
Mmel_00005026-RA	2740eb167ceba46e355e6112f3fed50c	290	Pfam	PF07525	SOCS box	251	289	4.5e-10	T	31-10-2019	IPR001496	SOCS box domain		Reactome: R-HSA-8951664
Mmel_00011726-RA	494cabca14e50500395d598361d9a7a7	80	Pfam	PF00431	CUB domain	16	74	3.1e-13	T	31-10-2019	IPR000859	CUB domain
Mmel_00009709-RA	c76f0c9b3a8d5f430e3cacecc5875dd3	1582	Pfam	PF16863	N-terminal barrel of NtMGAM and CtMGAM, maltase-glucoamylase	895	1005	2.6e-28	T	31-10-2019	IPR031727	Galactose mutarotase, N-terminal barrel
Mmel_00009709-RA	c76f0c9b3a8d5f430e3cacecc5875dd3	1582	Pfam	PF00088	Trefoil (P-type) domain	837	875	3.3e-08	T	31-10-2019	IPR000519	P-type trefoil domain
Mmel_00009709-RA	c76f0c9b3a8d5f430e3cacecc5875dd3	1582	Pfam	PF01055	Glycosyl hydrolases family 31	1316	1444	5.1e-39	T	31-10-2019	IPR000322	Glycoside hydrolase family 31	GO:0004553|GO:0005975
Mmel_00009709-RA	c76f0c9b3a8d5f430e3cacecc5875dd3	1582	Pfam	PF01055	Glycosyl hydrolases family 31	285	697	7.1e-127	T	31-10-2019	IPR000322	Glycoside hydrolase family 31	GO:0004553|GO:0005975
Mmel_00009709-RA	c76f0c9b3a8d5f430e3cacecc5875dd3	1582	Pfam	PF01055	Glycosyl hydrolases family 31	1040	1243	1.7e-46	T	31-10-2019	IPR000322	Glycoside hydrolase family 31	GO:0004553|GO:0005975
Mmel_00003355-RA	edde2905aec03f2a908093c2ce50cc41	173	Pfam	PF00010	Helix-loop-helix DNA-binding domain	110	163	6.1e-12	T	31-10-2019	IPR011598	Myc-type, basic helix-loop-helix (bHLH) domain	GO:0046983
Mmel_00009623-RA	f046c9322a8b293d9a5a2694905f88be	165	Pfam	PF01105	emp24/gp25L/p24 family/GOLD	25	160	4.2e-39	T	31-10-2019	IPR009038	GOLD domain
Mmel_00011712-RA	615de120067665e0ecbfd89ed0acd13b	422	Pfam	PF13176	Tetratricopeptide repeat	46	78	0.012	T	31-10-2019	IPR019734	Tetratricopeptide repeat	GO:0005515
Mmel_00011712-RA	615de120067665e0ecbfd89ed0acd13b	422	Pfam	PF13181	Tetratricopeptide repeat	282	312	0.019	T	31-10-2019	IPR019734	Tetratricopeptide repeat	GO:0005515
Mmel_00011712-RA	615de120067665e0ecbfd89ed0acd13b	422	Pfam	PF13424	Tetratricopeptide repeat	83	139	2.7e-09	T	31-10-2019
Mmel_00011712-RA	615de120067665e0ecbfd89ed0acd13b	422	Pfam	PF13424	Tetratricopeptide repeat	197	266	3.1e-09	T	31-10-2019
Mmel_00013266-RA	5f980506b19644d5b4379355a066d3ee	260	Pfam	PF01344	Kelch motif	197	235	2.5e-09	T	31-10-2019	IPR006652	Kelch repeat type 1	GO:0005515
Mmel_00013266-RA	5f980506b19644d5b4379355a066d3ee	260	Pfam	PF01344	Kelch motif	142	191	5.2e-07	T	31-10-2019	IPR006652	Kelch repeat type 1	GO:0005515
Mmel_00013266-RA	5f980506b19644d5b4379355a066d3ee	260	Pfam	PF07707	BTB And C-terminal Kelch	21	119	7.4e-25	T	31-10-2019	IPR011705	BTB/Kelch-associated
Mmel_00008386-RA	44c62c7ce5f7e9ea5f5907aeb4d4f892	908	Pfam	PF00763	Tetrahydrofolate dehydrogenase/cyclohydrolase, catalytic domain	28	138	4.5e-32	T	31-10-2019	IPR020630	Tetrahydrofolate dehydrogenase/cyclohydrolase, catalytic domain	GO:0004488|GO:0055114	KEGG: 00670+1.5.1.5+3.5.4.9|KEGG: 00720+1.5.1.5+3.5.4.9|MetaCyc: PWY-1722|MetaCyc: PWY-2201|MetaCyc: PWY-3841|MetaCyc: PWY-5030|MetaCyc: PWY-5497|MetaCyc: PWY-6613|MetaCyc: PWY-7909|Reactome: R-HSA-196757
Mmel_00008386-RA	44c62c7ce5f7e9ea5f5907aeb4d4f892	908	Pfam	PF01268	Formate--tetrahydrofolate ligase	331	723	1.4e-174	T	31-10-2019	IPR000559	Formate-tetrahydrofolate ligase, FTHFS	GO:0004329|GO:0005524	KEGG: 00670+6.3.4.3|KEGG: 00720+6.3.4.3|MetaCyc: PWY-1722|MetaCyc: PWY-2161|MetaCyc: PWY-2201|MetaCyc: PWY-3841|Reactome: R-HSA-196757
Mmel_00008386-RA	44c62c7ce5f7e9ea5f5907aeb4d4f892	908	Pfam	PF01268	Formate--tetrahydrofolate ligase	725	908	3.6e-63	T	31-10-2019	IPR000559	Formate-tetrahydrofolate ligase, FTHFS	GO:0004329|GO:0005524	KEGG: 00670+6.3.4.3|KEGG: 00720+6.3.4.3|MetaCyc: PWY-1722|MetaCyc: PWY-2161|MetaCyc: PWY-2201|MetaCyc: PWY-3841|Reactome: R-HSA-196757
Mmel_00008386-RA	44c62c7ce5f7e9ea5f5907aeb4d4f892	908	Pfam	PF02882	Tetrahydrofolate dehydrogenase/cyclohydrolase, NAD(P)-binding domain	142	306	2.6e-67	T	31-10-2019	IPR020631	Tetrahydrofolate dehydrogenase/cyclohydrolase, NAD(P)-binding domain	GO:0004488	KEGG: 00670+1.5.1.5+3.5.4.9|KEGG: 00720+1.5.1.5+3.5.4.9|MetaCyc: PWY-1722|MetaCyc: PWY-2201|MetaCyc: PWY-3841|MetaCyc: PWY-5030|MetaCyc: PWY-5497|MetaCyc: PWY-6613|MetaCyc: PWY-7909|Reactome: R-HSA-196757
Mmel_00005843-RA	e8be76708fc904e4a2f89299c3a51f8e	2754	Pfam	PF00053	Laminin EGF domain	519	546	1.5e-05	T	31-10-2019	IPR002049	Laminin EGF domain
Mmel_00005843-RA	e8be76708fc904e4a2f89299c3a51f8e	2754	Pfam	PF00053	Laminin EGF domain	552	592	2.5e-07	T	31-10-2019	IPR002049	Laminin EGF domain
Mmel_00005843-RA	e8be76708fc904e4a2f89299c3a51f8e	2754	Pfam	PF00053	Laminin EGF domain	358	399	2.2e-08	T	31-10-2019	IPR002049	Laminin EGF domain
Mmel_00005843-RA	e8be76708fc904e4a2f89299c3a51f8e	2754	Pfam	PF00053	Laminin EGF domain	1405	1462	2.1e-10	T	31-10-2019	IPR002049	Laminin EGF domain
Mmel_00005843-RA	e8be76708fc904e4a2f89299c3a51f8e	2754	Pfam	PF00053	Laminin EGF domain	1995	2049	7.1e-07	T	31-10-2019	IPR002049	Laminin EGF domain
Mmel_00005843-RA	e8be76708fc904e4a2f89299c3a51f8e	2754	Pfam	PF00053	Laminin EGF domain	1884	1940	7.6e-05	T	31-10-2019	IPR002049	Laminin EGF domain
Mmel_00005843-RA	e8be76708fc904e4a2f89299c3a51f8e	2754	Pfam	PF00053	Laminin EGF domain	1943	1992	1.9e-06	T	31-10-2019	IPR002049	Laminin EGF domain
Mmel_00005843-RA	e8be76708fc904e4a2f89299c3a51f8e	2754	Pfam	PF00053	Laminin EGF domain	79	122	9.6e-11	T	31-10-2019	IPR002049	Laminin EGF domain
Mmel_00005843-RA	e8be76708fc904e4a2f89299c3a51f8e	2754	Pfam	PF00053	Laminin EGF domain	1278	1331	5.3e-06	T	31-10-2019	IPR002049	Laminin EGF domain
Mmel_00005843-RA	e8be76708fc904e4a2f89299c3a51f8e	2754	Pfam	PF00053	Laminin EGF domain	1788	1830	1.8e-11	T	31-10-2019	IPR002049	Laminin EGF domain
Mmel_00005843-RA	e8be76708fc904e4a2f89299c3a51f8e	2754	Pfam	PF00053	Laminin EGF domain	2100	2140	1.3e-07	T	31-10-2019	IPR002049	Laminin EGF domain
Mmel_00005843-RA	e8be76708fc904e4a2f89299c3a51f8e	2754	Pfam	PF00053	Laminin EGF domain	445	488	5.2e-08	T	31-10-2019	IPR002049	Laminin EGF domain
Mmel_00005843-RA	e8be76708fc904e4a2f89299c3a51f8e	2754	Pfam	PF00053	Laminin EGF domain	1342	1397	4.9e-09	T	31-10-2019	IPR002049	Laminin EGF domain
Mmel_00005843-RA	e8be76708fc904e4a2f89299c3a51f8e	2754	Pfam	PF00053	Laminin EGF domain	1517	1555	3.2e-08	T	31-10-2019	IPR002049	Laminin EGF domain
Mmel_00005843-RA	e8be76708fc904e4a2f89299c3a51f8e	2754	Pfam	PF00053	Laminin EGF domain	1834	1881	7e-09	T	31-10-2019	IPR002049	Laminin EGF domain
Mmel_00005843-RA	e8be76708fc904e4a2f89299c3a51f8e	2754	Pfam	PF00053	Laminin EGF domain	2052	2094	5.1e-10	T	31-10-2019	IPR002049	Laminin EGF domain
Mmel_00005843-RA	e8be76708fc904e4a2f89299c3a51f8e	2754	Pfam	PF00053	Laminin EGF domain	1740	1785	7.9e-12	T	31-10-2019	IPR002049	Laminin EGF domain
Mmel_00005843-RA	e8be76708fc904e4a2f89299c3a51f8e	2754	Pfam	PF00053	Laminin EGF domain	130	170	5.1e-07	T	31-10-2019	IPR002049	Laminin EGF domain
Mmel_00005843-RA	e8be76708fc904e4a2f89299c3a51f8e	2754	Pfam	PF00053	Laminin EGF domain	405	441	4.5e-08	T	31-10-2019	IPR002049	Laminin EGF domain
Mmel_00005843-RA	e8be76708fc904e4a2f89299c3a51f8e	2754	Pfam	PF00053	Laminin EGF domain	19	76	8.6e-10	T	31-10-2019	IPR002049	Laminin EGF domain
Mmel_00005843-RA	e8be76708fc904e4a2f89299c3a51f8e	2754	Pfam	PF00055	Laminin N-terminal (Domain VI)	1079	1276	4.8e-66	T	31-10-2019	IPR008211	Laminin, N-terminal
Mmel_00013370-RA	61aa80fa04ead6936b56524376035ee3	261	Pfam	PF16897	C-terminal region of MMR_HSR1 domain	111	189	1.6e-19	T	31-10-2019	IPR031662	GTP binding protein, second domain
Mmel_00013370-RA	61aa80fa04ead6936b56524376035ee3	261	Pfam	PF01926	50S ribosome-binding GTPase	30	92	1.4e-06	T	31-10-2019	IPR006073	GTP binding domain	GO:0005525
Mmel_00013370-RA	61aa80fa04ead6936b56524376035ee3	261	Pfam	PF02824	TGS domain	199	260	8.8e-21	T	31-10-2019	IPR004095	TGS		KEGG: 00970+6.1.1.3
Mmel_00014151-RA	7e057d54332bdcc7372fac9ee3772add	451	Pfam	PF07687	Peptidase dimerisation domain	187	331	1.1e-16	T	31-10-2019	IPR011650	Peptidase M20, dimerisation domain
Mmel_00014151-RA	7e057d54332bdcc7372fac9ee3772add	451	Pfam	PF01546	Peptidase family M20/M25/M40	67	435	1.8e-31	T	31-10-2019	IPR002933	Peptidase M20	GO:0008152|GO:0016787
Mmel_00007921-RA	e5b1f8b694e0771a1c5551d5db3a586e	938	Pfam	PF01529	DHHC palmitoyltransferase	69	182	1.9e-26	T	31-10-2019	IPR001594	Palmitoyltransferase, DHHC domain
Mmel_00012390-RA	315ade54db161a650f185f8c41869587	1956	Pfam	PF06816	NOTCH protein	1145	1199	5.5e-25	T	31-10-2019	IPR010660	Notch, NOD domain	GO:0016021|GO:0030154	Reactome: R-HSA-1912399|Reactome: R-HSA-1912408|Reactome: R-HSA-1912420|Reactome: R-HSA-350054|Reactome: R-HSA-5083630
Mmel_00012390-RA	315ade54db161a650f185f8c41869587	1956	Pfam	PF12796	Ankyrin repeats (3 copies)	1528	1612	9.4e-09	T	31-10-2019	IPR020683	Ankyrin repeat-containing domain
Mmel_00012390-RA	315ade54db161a650f185f8c41869587	1956	Pfam	PF07645	Calcium-binding EGF domain	526	559	1.4e-06	T	31-10-2019	IPR001881	EGF-like calcium-binding domain	GO:0005509
Mmel_00012390-RA	315ade54db161a650f185f8c41869587	1956	Pfam	PF07645	Calcium-binding EGF domain	106	140	3.3e-09	T	31-10-2019	IPR001881	EGF-like calcium-binding domain	GO:0005509
Mmel_00012390-RA	315ade54db161a650f185f8c41869587	1956	Pfam	PF00008	EGF-like domain	905	937	6.1e-07	T	31-10-2019	IPR000742	EGF-like domain
Mmel_00012390-RA	315ade54db161a650f185f8c41869587	1956	Pfam	PF00008	EGF-like domain	377	404	5.5e-07	T	31-10-2019	IPR000742	EGF-like domain
Mmel_00012390-RA	315ade54db161a650f185f8c41869587	1956	Pfam	PF00008	EGF-like domain	189	218	1.9e-07	T	31-10-2019	IPR000742	EGF-like domain
Mmel_00012390-RA	315ade54db161a650f185f8c41869587	1956	Pfam	PF00008	EGF-like domain	340	369	2.6e-07	T	31-10-2019	IPR000742	EGF-like domain
Mmel_00012390-RA	315ade54db161a650f185f8c41869587	1956	Pfam	PF00008	EGF-like domain	151	180	1.4e-07	T	31-10-2019	IPR000742	EGF-like domain
Mmel_00012390-RA	315ade54db161a650f185f8c41869587	1956	Pfam	PF00008	EGF-like domain	227	255	4.1e-09	T	31-10-2019	IPR000742	EGF-like domain
Mmel_00012390-RA	315ade54db161a650f185f8c41869587	1956	Pfam	PF00008	EGF-like domain	752	781	2e-07	T	31-10-2019	IPR000742	EGF-like domain
Mmel_00012390-RA	315ade54db161a650f185f8c41869587	1956	Pfam	PF00008	EGF-like domain	302	332	2.7e-07	T	31-10-2019	IPR000742	EGF-like domain
Mmel_00012390-RA	315ade54db161a650f185f8c41869587	1956	Pfam	PF00008	EGF-like domain	70	101	5.6e-05	T	31-10-2019	IPR000742	EGF-like domain
Mmel_00012390-RA	315ade54db161a650f185f8c41869587	1956	Pfam	PF00008	EGF-like domain	715	744	2.8e-05	T	31-10-2019	IPR000742	EGF-like domain
Mmel_00012390-RA	315ade54db161a650f185f8c41869587	1956	Pfam	PF00008	EGF-like domain	452	481	5.5e-08	T	31-10-2019	IPR000742	EGF-like domain
Mmel_00012390-RA	315ade54db161a650f185f8c41869587	1956	Pfam	PF00008	EGF-like domain	681	711	1.9e-05	T	31-10-2019	IPR000742	EGF-like domain
Mmel_00012390-RA	315ade54db161a650f185f8c41869587	1956	Pfam	PF00008	EGF-like domain	607	634	1e-06	T	31-10-2019	IPR000742	EGF-like domain
Mmel_00012390-RA	315ade54db161a650f185f8c41869587	1956	Pfam	PF00008	EGF-like domain	490	522	1.4e-07	T	31-10-2019	IPR000742	EGF-like domain
Mmel_00012390-RA	315ade54db161a650f185f8c41869587	1956	Pfam	PF00008	EGF-like domain	643	673	8.4e-11	T	31-10-2019	IPR000742	EGF-like domain
Mmel_00012390-RA	315ade54db161a650f185f8c41869587	1956	Pfam	PF00008	EGF-like domain	835	862	8.3e-07	T	31-10-2019	IPR000742	EGF-like domain
Mmel_00012390-RA	315ade54db161a650f185f8c41869587	1956	Pfam	PF13857	Ankyrin repeats (many copies)	1477	1522	4.8e-09	T	31-10-2019
Mmel_00012390-RA	315ade54db161a650f185f8c41869587	1956	Pfam	PF07684	NOTCH protein	1223	1276	5.2e-19	T	31-10-2019	IPR011656	Notch, NODP domain	GO:0007219|GO:0007275|GO:0016021|GO:0030154	Reactome: R-HSA-1912399|Reactome: R-HSA-1912408|Reactome: R-HSA-1912420|Reactome: R-HSA-350054|Reactome: R-HSA-5083630
Mmel_00012390-RA	315ade54db161a650f185f8c41869587	1956	Pfam	PF11936	Domain of unknown function (DUF3454)	1872	1932	4.4e-24	T	31-10-2019	IPR024600	Domain of unknown function DUF3454, notch		Reactome: R-HSA-1912399|Reactome: R-HSA-1912408|Reactome: R-HSA-1912420|Reactome: R-HSA-350054|Reactome: R-HSA-5083630
Mmel_00012390-RA	315ade54db161a650f185f8c41869587	1956	Pfam	PF00066	LNR domain	1029	1061	9.4e-10	T	31-10-2019	IPR000800	Notch domain
Mmel_00012390-RA	315ade54db161a650f185f8c41869587	1956	Pfam	PF00066	LNR domain	1106	1139	8.5e-12	T	31-10-2019	IPR000800	Notch domain
Mmel_00012390-RA	315ade54db161a650f185f8c41869587	1956	Pfam	PF00066	LNR domain	1068	1102	7e-09	T	31-10-2019	IPR000800	Notch domain
Mmel_00012390-RA	315ade54db161a650f185f8c41869587	1956	Pfam	PF12661	Human growth factor-like EGF	795	815	1.7e-06	T	31-10-2019	IPR013032	EGF-like, conserved site
Mmel_00012390-RA	315ade54db161a650f185f8c41869587	1956	Pfam	PF12661	Human growth factor-like EGF	38	58	0.00019	T	31-10-2019	IPR013032	EGF-like, conserved site
Mmel_00012390-RA	315ade54db161a650f185f8c41869587	1956	Pfam	PF12661	Human growth factor-like EGF	2	21	0.0029	T	31-10-2019	IPR013032	EGF-like, conserved site
Mmel_00012390-RA	315ade54db161a650f185f8c41869587	1956	Pfam	PF12661	Human growth factor-like EGF	270	290	5.2e-05	T	31-10-2019	IPR013032	EGF-like, conserved site
Mmel_00012390-RA	315ade54db161a650f185f8c41869587	1956	Pfam	PF12661	Human growth factor-like EGF	420	440	0.017	T	31-10-2019	IPR013032	EGF-like, conserved site
Mmel_00014858-RA	1f227895c42b711731ce3e9190acb8a0	75	Pfam	PF00096	Zinc finger, C2H2 type	24	46	0.00047	T	31-10-2019
Mmel_00004928-RA	2da3018deaa1d40ab92ef7e1a71a67bf	1339	Pfam	PF12717	non-SMC mitotic condensation complex subunit 1	999	1158	1.6e-51	T	31-10-2019	IPR032682	Condensin complex subunit 1, C-terminal
Mmel_00004928-RA	2da3018deaa1d40ab92ef7e1a71a67bf	1339	Pfam	PF12922	non-SMC mitotic condensation complex subunit 1, N-term	6	158	4.6e-30	T	31-10-2019	IPR024324	Condensin complex subunit 1, N-terminal		Reactome: R-HSA-2514853
Mmel_00005179-RA	9749235fc81153a738b2a7ecc190347f	673	Pfam	PF00005	ABC transporter	93	268	3.4e-24	T	31-10-2019	IPR003439	ABC transporter-like	GO:0005524|GO:0016887
Mmel_00005179-RA	9749235fc81153a738b2a7ecc190347f	673	Pfam	PF01061	ABC-2 type transporter	404	608	1.2e-28	T	31-10-2019	IPR013525	ABC-2 type transporter	GO:0016020	Reactome: R-HSA-1369062
Mmel_00003160-RA	a2791807b1135aaa9f81fbc9257dab0a	438	Pfam	PF15030	Protein of unknown function (DUF4527)	94	216	7.9e-33	T	31-10-2019	IPR032771	Protein of unknown function DUF4527
Mmel_00012384-RA	45e8c3bb0afaeb9099476a69e2d1ae6e	728	Pfam	PF01448	ELM2 domain	186	238	1.7e-12	T	31-10-2019	IPR000949	ELM2 domain
Mmel_00012384-RA	45e8c3bb0afaeb9099476a69e2d1ae6e	728	Pfam	PF00249	Myb-like DNA-binding domain	306	350	1.8e-05	T	31-10-2019	IPR001005	SANT/Myb domain
Mmel_00012384-RA	45e8c3bb0afaeb9099476a69e2d1ae6e	728	Pfam	PF01426	BAH domain	8	183	2.6e-32	T	31-10-2019	IPR001025	Bromo adjacent homology (BAH) domain	GO:0003682
Mmel_00012384-RA	45e8c3bb0afaeb9099476a69e2d1ae6e	728	Pfam	PF00320	GATA zinc finger	442	478	2.1e-09	T	31-10-2019	IPR000679	Zinc finger, GATA-type	GO:0003700|GO:0006355|GO:0008270|GO:0043565
Mmel_00012384-RA	45e8c3bb0afaeb9099476a69e2d1ae6e	728	Pfam	PF17226	MTA R1 domain	513	590	1.5e-34	T	31-10-2019	IPR035170	Metastasis-associated protein MTA1, R1 domain		Reactome: R-HSA-3214815|Reactome: R-HSA-427389|Reactome: R-HSA-73762|Reactome: R-HSA-8943724
Mmel_00007746-RA	0391199031c2bacc0bc86cceb1f25407	600	Pfam	PF14694	Lines N-terminus	267	415	1.6e-44	T	31-10-2019	IPR032794	Protein Lines, N-terminal
Mmel_00007746-RA	0391199031c2bacc0bc86cceb1f25407	600	Pfam	PF14694	Lines N-terminus	412	442	7.7e-12	T	31-10-2019	IPR032794	Protein Lines, N-terminal
Mmel_00009036-RA	ea652179044368a5d006848def70cac9	882	Pfam	PF08725	Integrin beta cytoplasmic domain	824	868	1.9e-18	T	31-10-2019	IPR014836	Integrin beta subunit, cytoplasmic domain		Reactome: R-HSA-216083
Mmel_00009036-RA	ea652179044368a5d006848def70cac9	882	Pfam	PF00362	Integrin beta chain VWA domain	195	441	5.9e-110	T	31-10-2019	IPR002369	Integrin beta subunit, VWA domain		Reactome: R-HSA-216083
Mmel_00009036-RA	ea652179044368a5d006848def70cac9	882	Pfam	PF17205	Integrin plexin domain	88	137	1.8e-13	T	31-10-2019	IPR033760	Integrin beta N-terminal		Reactome: R-HSA-216083
Mmel_00006542-RA	ef1584e829db7a5a71840e80285cbf4e	148	Pfam	PF00753	Metallo-beta-lactamase superfamily	10	99	2.2e-09	T	31-10-2019	IPR001279	Metallo-beta-lactamase
Mmel_00008360-RA	388fd13d01427cf286a8558f10284a88	325	Pfam	PF13242	HAD-hyrolase-like	271	315	3.8e-08	T	31-10-2019
Mmel_00008360-RA	388fd13d01427cf286a8558f10284a88	325	Pfam	PF13344	Haloacid dehalogenase-like hydrolase	10	155	3.1e-13	T	31-10-2019	IPR006357	HAD-superfamily hydrolase, subfamily IIA
Mmel_00000558-RA	58266c097ba4b9b054067c3eb9e74ff6	270	Pfam	PF01477	PLAT/LH2 domain	3	39	6.5e-05	T	31-10-2019	IPR001024	PLAT/LH2 domain	GO:0005515
Mmel_00000558-RA	58266c097ba4b9b054067c3eb9e74ff6	270	Pfam	PF01477	PLAT/LH2 domain	78	123	5.7e-06	T	31-10-2019	IPR001024	PLAT/LH2 domain	GO:0005515
Mmel_00000558-RA	58266c097ba4b9b054067c3eb9e74ff6	270	Pfam	PF01477	PLAT/LH2 domain	145	251	5.6e-16	T	31-10-2019	IPR001024	PLAT/LH2 domain	GO:0005515
Mmel_00004095-RA	4ccdf0e97131890c2553f643c043143b	64	Pfam	PF12661	Human growth factor-like EGF	26	47	2.2e-08	T	31-10-2019	IPR013032	EGF-like, conserved site
Mmel_00006463-RA	2690f81c194cd5734311349c5fa4dcdc	221	Pfam	PF04104	Eukaryotic and archaeal DNA primase, large subunit	1	161	3.2e-65	T	31-10-2019	IPR007238	DNA primase large subunit, eukaryotic/archaeal	GO:0003896|GO:0006269	Reactome: R-HSA-113501|Reactome: R-HSA-174411|Reactome: R-HSA-174430|Reactome: R-HSA-68952|Reactome: R-HSA-68962|Reactome: R-HSA-69091|Reactome: R-HSA-69166|Reactome: R-HSA-69183
Mmel_00001961-RA	d0579a461bf4345c91c4bf6ed958ed98	1148	Pfam	PF01410	Fibrillar collagen C-terminal domain	920	1147	2e-103	T	31-10-2019	IPR000885	Fibrillar collagen, C-terminal	GO:0005201	Reactome: R-HSA-1442490|Reactome: R-HSA-1650814|Reactome: R-HSA-2022090|Reactome: R-HSA-3000171|Reactome: R-HSA-8874081|Reactome: R-HSA-8948216
Mmel_00001961-RA	d0579a461bf4345c91c4bf6ed958ed98	1148	Pfam	PF01391	Collagen triple helix repeat (20 copies)	223	281	6e-10	T	31-10-2019	IPR008160	Collagen triple helix repeat
Mmel_00001961-RA	d0579a461bf4345c91c4bf6ed958ed98	1148	Pfam	PF01391	Collagen triple helix repeat (20 copies)	274	332	6e-07	T	31-10-2019	IPR008160	Collagen triple helix repeat
Mmel_00001961-RA	d0579a461bf4345c91c4bf6ed958ed98	1148	Pfam	PF01391	Collagen triple helix repeat (20 copies)	829	882	1.1e-08	T	31-10-2019	IPR008160	Collagen triple helix repeat
Mmel_00001961-RA	d0579a461bf4345c91c4bf6ed958ed98	1148	Pfam	PF01391	Collagen triple helix repeat (20 copies)	625	681	1.5e-08	T	31-10-2019	IPR008160	Collagen triple helix repeat
Mmel_00001961-RA	d0579a461bf4345c91c4bf6ed958ed98	1148	Pfam	PF01391	Collagen triple helix repeat (20 copies)	168	218	1.8e-06	T	31-10-2019	IPR008160	Collagen triple helix repeat
Mmel_00001961-RA	d0579a461bf4345c91c4bf6ed958ed98	1148	Pfam	PF01391	Collagen triple helix repeat (20 copies)	118	176	2.4e-09	T	31-10-2019	IPR008160	Collagen triple helix repeat
Mmel_00005177-RA	bad6c0bb33210470bb8e9ac5b483015c	351	Pfam	PF05783	Dynein light intermediate chain (DLIC)	30	164	1.3e-09	T	31-10-2019	IPR022780	Dynein family light intermediate chain
Mmel_00005177-RA	bad6c0bb33210470bb8e9ac5b483015c	351	Pfam	PF05783	Dynein light intermediate chain (DLIC)	170	266	0.025	T	31-10-2019	IPR022780	Dynein family light intermediate chain
Mmel_00013849-RA	0547bd154cdd56e7942d0a87c2cf8ab6	829	Pfam	PF01585	G-patch domain	147	190	2e-16	T	31-10-2019	IPR000467	G-patch domain	GO:0003676
Mmel_00013849-RA	0547bd154cdd56e7942d0a87c2cf8ab6	829	Pfam	PF12457	Tuftelin interacting protein N terminal	29	106	8.9e-22	T	31-10-2019	IPR022159	Tuftelin interacting protein, N-terminal domain		Reactome: R-HSA-72163
Mmel_00013849-RA	0547bd154cdd56e7942d0a87c2cf8ab6	829	Pfam	PF07842	GC-rich sequence DNA-binding factor-like protein	389	658	5.6e-98	T	31-10-2019	IPR022783	GC-rich sequence DNA-binding factor-like domain
Mmel_00008550-RA	bb78b71f8939b9374d3d0a16aa70f54b	921	Pfam	PF00270	DEAD/DEAH box helicase	305	430	4.5e-07	T	31-10-2019	IPR011545	DEAD/DEAH box helicase domain	GO:0003676|GO:0005524
Mmel_00008550-RA	bb78b71f8939b9374d3d0a16aa70f54b	921	Pfam	PF00567	Tudor domain	683	780	2e-08	T	31-10-2019	IPR002999	Tudor domain
Mmel_00008550-RA	bb78b71f8939b9374d3d0a16aa70f54b	921	Pfam	PF00567	Tudor domain	11	127	3.7e-16	T	31-10-2019	IPR002999	Tudor domain
Mmel_00006216-RA	43586480f9bbd4234402d1053b669d44	243	Pfam	PF05466	Brain acid soluble protein 1 (BASP1 protein)	2	243	2.5e-95	T	31-10-2019	IPR008408	Brain acid soluble protein 1
Mmel_00001437-RA	91558af80bc73676c3ad054dcd15d4cb	513	Pfam	PF00788	Ras association (RalGDS/AF-6) domain	2	80	5.1e-10	T	31-10-2019	IPR000159	Ras-associating (RA) domain	GO:0007165
Mmel_00001437-RA	91558af80bc73676c3ad054dcd15d4cb	513	Pfam	PF00017	SH2 domain	327	408	3.9e-15	T	31-10-2019	IPR000980	SH2 domain
Mmel_00001437-RA	91558af80bc73676c3ad054dcd15d4cb	513	Pfam	PF08947	BPS (Between PH and SH2)	259	305	3e-28	T	31-10-2019	IPR015042	BPS (Between PH and SH2) domain
Mmel_00001437-RA	91558af80bc73676c3ad054dcd15d4cb	513	Pfam	PF00169	PH domain	126	230	5.3e-10	T	31-10-2019	IPR001849	Pleckstrin homology domain
Mmel_00007362-RA	6b2fe4f59dbb1bf2aea80312e6a9819b	507	Pfam	PF05986	ADAM-TS Spacer 1	212	282	3.3e-15	T	31-10-2019	IPR010294	ADAM-TS Spacer 1		Reactome: R-HSA-5083635|Reactome: R-HSA-5173214
Mmel_00007362-RA	6b2fe4f59dbb1bf2aea80312e6a9819b	507	Pfam	PF00090	Thrombospondin type 1 domain	77	103	6.5e-05	T	31-10-2019	IPR000884	Thrombospondin type-1 (TSP1) repeat
Mmel_00007362-RA	6b2fe4f59dbb1bf2aea80312e6a9819b	507	Pfam	PF00090	Thrombospondin type 1 domain	425	470	9.2e-06	T	31-10-2019	IPR000884	Thrombospondin type-1 (TSP1) repeat
Mmel_00007362-RA	6b2fe4f59dbb1bf2aea80312e6a9819b	507	Pfam	PF00090	Thrombospondin type 1 domain	365	418	3.3e-05	T	31-10-2019	IPR000884	Thrombospondin type-1 (TSP1) repeat
Mmel_00013861-RA	cb7c388b9d42fe8d9591ef55e5b8afb3	129	Pfam	PF01602	Adaptin N terminal region	14	116	4.9e-21	T	31-10-2019	IPR002553	Clathrin/coatomer adaptor, adaptin-like, N-terminal	GO:0006886|GO:0016192|GO:0030117
Mmel_00010289-RA	34a9d517f04de952e9bac3db9e406dfa	521	Pfam	PF00083	Sugar (and other) transporter	139	511	3.8e-29	T	31-10-2019	IPR005828	Major facilitator, sugar transporter-like	GO:0016021|GO:0022857|GO:0055085
Mmel_00012747-RA	fdc7c5b18a9da00a31370475af33bcc5	109	Pfam	PF00096	Zinc finger, C2H2 type	37	59	7.8e-06	T	31-10-2019
Mmel_00012747-RA	fdc7c5b18a9da00a31370475af33bcc5	109	Pfam	PF00096	Zinc finger, C2H2 type	9	31	0.00035	T	31-10-2019
Mmel_00012747-RA	fdc7c5b18a9da00a31370475af33bcc5	109	Pfam	PF13465	Zinc-finger double domain	80	103	1.7e-10	T	31-10-2019
Mmel_00004592-RA	59bd2edc3b3d40aa5c48f71bc63aa34f	209	Pfam	PF00835	SNAP-25 family	86	145	6e-22	T	31-10-2019	IPR000928	SNAP-25		Reactome: R-HSA-6798695
Mmel_00005954-RA	f5ffbf89610954895d61c8a0ab262e5a	1244	Pfam	PF00122	E1-E2 ATPase	141	386	7.9e-09	T	31-10-2019
Mmel_00005954-RA	f5ffbf89610954895d61c8a0ab262e5a	1244	Pfam	PF13246	Cation transport ATPase (P-type)	508	600	6e-09	T	31-10-2019
Mmel_00005954-RA	f5ffbf89610954895d61c8a0ab262e5a	1244	Pfam	PF16209	Phospholipid-translocating ATPase N-terminal	51	107	1.7e-21	T	31-10-2019	IPR032631	P-type ATPase, N-terminal		Reactome: R-HSA-936837
Mmel_00005954-RA	f5ffbf89610954895d61c8a0ab262e5a	1244	Pfam	PF16212	Phospholipid-translocating P-type ATPase C-terminal	841	1094	9.7e-78	T	31-10-2019	IPR032630	P-type ATPase, C-terminal		Reactome: R-HSA-936837
Mmel_00003058-RA	7d9ee60a8236a007d44bdf038c31c53e	1170	Pfam	PF00625	Guanylate kinase	754	855	1.9e-11	T	31-10-2019	IPR008145	Guanylate kinase/L-type calcium channel beta subunit
Mmel_00003058-RA	7d9ee60a8236a007d44bdf038c31c53e	1170	Pfam	PF07653	Variant SH3 domain	586	645	5.4e-07	T	31-10-2019	IPR001452	SH3 domain	GO:0005515
Mmel_00003058-RA	7d9ee60a8236a007d44bdf038c31c53e	1170	Pfam	PF00595	PDZ domain (Also known as DHR or GLGF)	22	104	1.4e-15	T	31-10-2019	IPR001478	PDZ domain	GO:0005515
Mmel_00003058-RA	7d9ee60a8236a007d44bdf038c31c53e	1170	Pfam	PF00595	PDZ domain (Also known as DHR or GLGF)	291	358	2.2e-13	T	31-10-2019	IPR001478	PDZ domain	GO:0005515
Mmel_00003058-RA	7d9ee60a8236a007d44bdf038c31c53e	1170	Pfam	PF00595	PDZ domain (Also known as DHR or GLGF)	494	564	1.5e-12	T	31-10-2019	IPR001478	PDZ domain	GO:0005515
Mmel_00004983-RA	508a86361e0c5aab0488c883d37c28dc	3458	Pfam	PF02210	Laminin G domain	2733	2859	1e-27	T	31-10-2019	IPR001791	Laminin G domain
Mmel_00004983-RA	508a86361e0c5aab0488c883d37c28dc	3458	Pfam	PF00008	EGF-like domain	2967	2997	3.3e-07	T	31-10-2019	IPR000742	EGF-like domain
Mmel_00004983-RA	508a86361e0c5aab0488c883d37c28dc	3458	Pfam	PF00008	EGF-like domain	2891	2918	8.5e-05	T	31-10-2019	IPR000742	EGF-like domain
Mmel_00004983-RA	508a86361e0c5aab0488c883d37c28dc	3458	Pfam	PF00008	EGF-like domain	3005	3035	4.8e-05	T	31-10-2019	IPR000742	EGF-like domain
Mmel_00004983-RA	508a86361e0c5aab0488c883d37c28dc	3458	Pfam	PF00028	Cadherin domain	1311	1398	4.7e-12	T	31-10-2019	IPR002126	Cadherin	GO:0005509|GO:0007156|GO:0016020
Mmel_00004983-RA	508a86361e0c5aab0488c883d37c28dc	3458	Pfam	PF00028	Cadherin domain	900	988	4.8e-09	T	31-10-2019	IPR002126	Cadherin	GO:0005509|GO:0007156|GO:0016020
Mmel_00004983-RA	508a86361e0c5aab0488c883d37c28dc	3458	Pfam	PF00028	Cadherin domain	811	885	5.2e-12	T	31-10-2019	IPR002126	Cadherin	GO:0005509|GO:0007156|GO:0016020
Mmel_00004983-RA	508a86361e0c5aab0488c883d37c28dc	3458	Pfam	PF00028	Cadherin domain	2361	2451	1.5e-13	T	31-10-2019	IPR002126	Cadherin	GO:0005509|GO:0007156|GO:0016020
Mmel_00004983-RA	508a86361e0c5aab0488c883d37c28dc	3458	Pfam	PF00028	Cadherin domain	1413	1501	2.9e-12	T	31-10-2019	IPR002126	Cadherin	GO:0005509|GO:0007156|GO:0016020
Mmel_00004983-RA	508a86361e0c5aab0488c883d37c28dc	3458	Pfam	PF00028	Cadherin domain	1205	1297	1.4e-19	T	31-10-2019	IPR002126	Cadherin	GO:0005509|GO:0007156|GO:0016020
Mmel_00004983-RA	508a86361e0c5aab0488c883d37c28dc	3458	Pfam	PF00028	Cadherin domain	63	152	4.5e-22	T	31-10-2019	IPR002126	Cadherin	GO:0005509|GO:0007156|GO:0016020
Mmel_00004983-RA	508a86361e0c5aab0488c883d37c28dc	3458	Pfam	PF00028	Cadherin domain	1730	1825	1.9e-18	T	31-10-2019	IPR002126	Cadherin	GO:0005509|GO:0007156|GO:0016020
Mmel_00004983-RA	508a86361e0c5aab0488c883d37c28dc	3458	Pfam	PF00028	Cadherin domain	485	574	1.3e-21	T	31-10-2019	IPR002126	Cadherin	GO:0005509|GO:0007156|GO:0016020
Mmel_00004983-RA	508a86361e0c5aab0488c883d37c28dc	3458	Pfam	PF00028	Cadherin domain	588	671	4.6e-12	T	31-10-2019	IPR002126	Cadherin	GO:0005509|GO:0007156|GO:0016020
Mmel_00004983-RA	508a86361e0c5aab0488c883d37c28dc	3458	Pfam	PF00028	Cadherin domain	2046	2137	6.7e-20	T	31-10-2019	IPR002126	Cadherin	GO:0005509|GO:0007156|GO:0016020
Mmel_00004983-RA	508a86361e0c5aab0488c883d37c28dc	3458	Pfam	PF00028	Cadherin domain	1103	1177	2.3e-14	T	31-10-2019	IPR002126	Cadherin	GO:0005509|GO:0007156|GO:0016020
Mmel_00004983-RA	508a86361e0c5aab0488c883d37c28dc	3458	Pfam	PF00028	Cadherin domain	2256	2346	5.2e-24	T	31-10-2019	IPR002126	Cadherin	GO:0005509|GO:0007156|GO:0016020
Mmel_00004983-RA	508a86361e0c5aab0488c883d37c28dc	3458	Pfam	PF00028	Cadherin domain	377	468	4.4e-15	T	31-10-2019	IPR002126	Cadherin	GO:0005509|GO:0007156|GO:0016020
Mmel_00004983-RA	508a86361e0c5aab0488c883d37c28dc	3458	Pfam	PF00028	Cadherin domain	1624	1715	2e-09	T	31-10-2019	IPR002126	Cadherin	GO:0005509|GO:0007156|GO:0016020
Mmel_00004983-RA	508a86361e0c5aab0488c883d37c28dc	3458	Pfam	PF00028	Cadherin domain	1947	2028	8.1e-18	T	31-10-2019	IPR002126	Cadherin	GO:0005509|GO:0007156|GO:0016020
Mmel_00004983-RA	508a86361e0c5aab0488c883d37c28dc	3458	Pfam	PF00028	Cadherin domain	303	362	7.4e-10	T	31-10-2019	IPR002126	Cadherin	GO:0005509|GO:0007156|GO:0016020
Mmel_00004983-RA	508a86361e0c5aab0488c883d37c28dc	3458	Pfam	PF00028	Cadherin domain	1009	1090	1.1e-12	T	31-10-2019	IPR002126	Cadherin	GO:0005509|GO:0007156|GO:0016020
Mmel_00004983-RA	508a86361e0c5aab0488c883d37c28dc	3458	Pfam	PF00028	Cadherin domain	179	260	6e-10	T	31-10-2019	IPR002126	Cadherin	GO:0005509|GO:0007156|GO:0016020
Mmel_00004983-RA	508a86361e0c5aab0488c883d37c28dc	3458	Pfam	PF00028	Cadherin domain	706	783	2.3e-14	T	31-10-2019	IPR002126	Cadherin	GO:0005509|GO:0007156|GO:0016020
Mmel_00004983-RA	508a86361e0c5aab0488c883d37c28dc	3458	Pfam	PF00028	Cadherin domain	1839	1929	1.6e-15	T	31-10-2019	IPR002126	Cadherin	GO:0005509|GO:0007156|GO:0016020
Mmel_00004983-RA	508a86361e0c5aab0488c883d37c28dc	3458	Pfam	PF00028	Cadherin domain	1518	1609	5e-09	T	31-10-2019	IPR002126	Cadherin	GO:0005509|GO:0007156|GO:0016020
Mmel_00004983-RA	508a86361e0c5aab0488c883d37c28dc	3458	Pfam	PF00028	Cadherin domain	2151	2242	8.5e-24	T	31-10-2019	IPR002126	Cadherin	GO:0005509|GO:0007156|GO:0016020
Mmel_00011213-RA	448ee801d91509e7b8b0e940720c8435	511	Pfam	PF14575	Ephrin type-A receptor 2 transmembrane domain	274	345	1.5e-18	T	31-10-2019	IPR027936	Ephrin receptor, transmembrane domain		Reactome: R-HSA-2682334|Reactome: R-HSA-3928665
Mmel_00011213-RA	448ee801d91509e7b8b0e940720c8435	511	Pfam	PF00041	Fibronectin type III domain	55	144	1.3e-07	T	31-10-2019	IPR003961	Fibronectin type III	GO:0005515
Mmel_00011213-RA	448ee801d91509e7b8b0e940720c8435	511	Pfam	PF00041	Fibronectin type III domain	172	250	1.8e-15	T	31-10-2019	IPR003961	Fibronectin type III	GO:0005515
Mmel_00011213-RA	448ee801d91509e7b8b0e940720c8435	511	Pfam	PF07647	SAM domain (Sterile alpha motif)	436	500	1.8e-20	T	31-10-2019	IPR001660	Sterile alpha motif domain	GO:0005515
Mmel_00011213-RA	448ee801d91509e7b8b0e940720c8435	511	Pfam	PF07714	Protein tyrosine kinase	359	405	3.8e-08	T	31-10-2019	IPR001245	Serine-threonine/tyrosine-protein kinase, catalytic domain	GO:0004672|GO:0006468
Mmel_00002958-RA	4bdecc9fac0a8b9e666fcff5d6889ac6	611	Pfam	PF00939	Sodium:sulfate symporter transmembrane region	8	594	2e-97	T	31-10-2019	IPR001898	Solute carrier family 13	GO:0005215|GO:0006814|GO:0016020|GO:0055085	Reactome: R-HSA-433137
Mmel_00000912-RA	242f874df0c6b3e6d82febbce146f8f2	229	Pfam	PF00157	Pou domain - N-terminal to homeobox domain	18	62	1.3e-14	T	31-10-2019	IPR000327	POU-specific domain	GO:0003700|GO:0006355
Mmel_00000912-RA	242f874df0c6b3e6d82febbce146f8f2	229	Pfam	PF00157	Pou domain - N-terminal to homeobox domain	97	124	1.5e-07	T	31-10-2019	IPR000327	POU-specific domain	GO:0003700|GO:0006355
Mmel_00000912-RA	242f874df0c6b3e6d82febbce146f8f2	229	Pfam	PF00046	Homeobox domain	146	201	1.3e-18	T	31-10-2019	IPR001356	Homeobox domain	GO:0003677
Mmel_00004727-RA	ae24c90fbb4216a801e114951b6f6232	532	Pfam	PF08447	PAS fold	8	53	2.2e-07	T	31-10-2019	IPR013655	PAS fold-3	GO:0005515
Mmel_00008640-RA	abf8cfae2159aab7f5f84d45a9cdbe08	774	Pfam	PF00561	alpha/beta hydrolase fold	123	423	2.5e-29	T	31-10-2019	IPR000073	Alpha/beta hydrolase fold-1
Mmel_00008640-RA	abf8cfae2159aab7f5f84d45a9cdbe08	774	Pfam	PF04083	Partial alpha/beta-hydrolase lipase region	466	526	1.1e-21	T	31-10-2019	IPR006693	Partial AB-hydrolase lipase domain	GO:0006629	Reactome: R-HSA-6809371
Mmel_00011226-RA	b0ed3e67a1d76dda2a9fe4f5d57d5e29	559	Pfam	PF00412	LIM domain	489	552	2.9e-08	T	31-10-2019	IPR001781	Zinc finger, LIM-type
Mmel_00011226-RA	b0ed3e67a1d76dda2a9fe4f5d57d5e29	559	Pfam	PF00412	LIM domain	429	484	6.9e-12	T	31-10-2019	IPR001781	Zinc finger, LIM-type
Mmel_00011226-RA	b0ed3e67a1d76dda2a9fe4f5d57d5e29	559	Pfam	PF00412	LIM domain	369	424	2.6e-14	T	31-10-2019	IPR001781	Zinc finger, LIM-type
Mmel_00003109-RA	1b67141826dd6fd6728af853f7d7ee5e	1221	Pfam	PF01825	GPCR proteolysis site, GPS, motif	607	647	1.9e-06	T	31-10-2019	IPR000203	GPS motif
Mmel_00003109-RA	1b67141826dd6fd6728af853f7d7ee5e	1221	Pfam	PF07679	Immunoglobulin I-set domain	153	246	5.3e-06	T	31-10-2019	IPR013098	Immunoglobulin I-set
Mmel_00003109-RA	1b67141826dd6fd6728af853f7d7ee5e	1221	Pfam	PF13855	Leucine rich repeat	18	71	2e-15	T	31-10-2019	IPR001611	Leucine-rich repeat	GO:0005515
Mmel_00004675-RA	b96d9f8fb4da7d9257105d644f6549ad	1637	Pfam	PF13393	Histidyl-tRNA synthetase	1071	1352	1.2e-14	T	31-10-2019
Mmel_00004675-RA	b96d9f8fb4da7d9257105d644f6549ad	1637	Pfam	PF12745	Anticodon binding domain of tRNAs	1366	1615	4.8e-17	T	31-10-2019	IPR024435	Histidyl tRNA synthetase-related domain		KEGG: 04150+2.7.11.1|KEGG: 04151+2.7.11.1|KEGG: 04714+2.7.11.1|KEGG: 04926+2.7.11.1|KEGG: 05165+2.7.11.1
Mmel_00004675-RA	b96d9f8fb4da7d9257105d644f6549ad	1637	Pfam	PF05773	RWD domain	39	102	5.5e-14	T	31-10-2019	IPR006575	RWD domain	GO:0005515
Mmel_00004675-RA	b96d9f8fb4da7d9257105d644f6549ad	1637	Pfam	PF00069	Protein kinase domain	762	970	9.7e-36	T	31-10-2019	IPR000719	Protein kinase domain	GO:0004672|GO:0005524|GO:0006468
Mmel_00004675-RA	b96d9f8fb4da7d9257105d644f6549ad	1637	Pfam	PF00069	Protein kinase domain	567	636	5.1e-12	T	31-10-2019	IPR000719	Protein kinase domain	GO:0004672|GO:0005524|GO:0006468
Mmel_00004675-RA	b96d9f8fb4da7d9257105d644f6549ad	1637	Pfam	PF00069	Protein kinase domain	295	515	1e-25	T	31-10-2019	IPR000719	Protein kinase domain	GO:0004672|GO:0005524|GO:0006468
Mmel_00015040-RA	4ad24e871b27f7a2b1d7c16ff796f07e	115	Pfam	PF02055	Glycosyl hydrolase family 30 TIM-barrel domain	2	41	1.1e-17	T	31-10-2019	IPR033453	Glycosyl hydrolase family 30, TIM-barrel domain		Reactome: R-HSA-1660662|Reactome: R-HSA-390471
Mmel_00015040-RA	4ad24e871b27f7a2b1d7c16ff796f07e	115	Pfam	PF17189	Glycosyl hydrolase family 30 beta sandwich domain	44	109	6.3e-15	T	31-10-2019	IPR033452	Glycosyl hydrolase family 30, beta sandwich domain		Reactome: R-HSA-1660662|Reactome: R-HSA-390471
Mmel_00015154-RA	d978c2555ce1f3ee0c087d907e9c9125	146	Pfam	PF00096	Zinc finger, C2H2 type	123	145	1.5e-07	T	31-10-2019
Mmel_00015154-RA	d978c2555ce1f3ee0c087d907e9c9125	146	Pfam	PF00096	Zinc finger, C2H2 type	95	117	5.9e-05	T	31-10-2019
Mmel_00015154-RA	d978c2555ce1f3ee0c087d907e9c9125	146	Pfam	PF00096	Zinc finger, C2H2 type	39	56	0.0028	T	31-10-2019
Mmel_00001416-RA	13ca929f7c290af03fd1a65c23d9fe0a	56	Pfam	PF08039	Mitochondrial proteolipid	1	56	1.2e-09	T	31-10-2019	IPR012574	Mitochondrial proteolipid	GO:0005739
Mmel_00000055-RA	296f990f25251b15c228e7a22a9e1986	635	Pfam	PF01833	IPT/TIG domain	95	177	5.6e-16	T	31-10-2019	IPR002909	IPT domain
Mmel_00005574-RA	3fc4c9a7ca6aa9d0c0159ecc66560974	534	Pfam	PF13855	Leucine rich repeat	96	155	3.6e-15	T	31-10-2019	IPR001611	Leucine-rich repeat	GO:0005515
Mmel_00013975-RA	8a07540a41a037a58893304573feab22	128	Pfam	PF02422	Keratin	7	77	1e-28	T	31-10-2019	IPR003461	Keratin	GO:0005200|GO:0005882
Mmel_00011704-RA	3864cbb1512e5ab6ff1045da3c029cb9	784	Pfam	PF00023	Ankyrin repeat	653	685	0.0051	T	31-10-2019	IPR002110	Ankyrin repeat	GO:0005515
Mmel_00011704-RA	3864cbb1512e5ab6ff1045da3c029cb9	784	Pfam	PF00066	LNR domain	177	210	1.4e-09	T	31-10-2019	IPR000800	Notch domain
Mmel_00011704-RA	3864cbb1512e5ab6ff1045da3c029cb9	784	Pfam	PF00066	LNR domain	217	252	5.3e-13	T	31-10-2019	IPR000800	Notch domain
Mmel_00011704-RA	3864cbb1512e5ab6ff1045da3c029cb9	784	Pfam	PF00066	LNR domain	256	291	3.8e-11	T	31-10-2019	IPR000800	Notch domain
Mmel_00011704-RA	3864cbb1512e5ab6ff1045da3c029cb9	784	Pfam	PF12796	Ankyrin repeats (3 copies)	572	648	1.2e-10	T	31-10-2019	IPR020683	Ankyrin repeat-containing domain
Mmel_00011704-RA	3864cbb1512e5ab6ff1045da3c029cb9	784	Pfam	PF06816	NOTCH protein	296	351	6.5e-25	T	31-10-2019	IPR010660	Notch, NOD domain	GO:0016021|GO:0030154	Reactome: R-HSA-1912399|Reactome: R-HSA-1912408|Reactome: R-HSA-1912420|Reactome: R-HSA-350054|Reactome: R-HSA-5083630
Mmel_00011704-RA	3864cbb1512e5ab6ff1045da3c029cb9	784	Pfam	PF07684	NOTCH protein	401	455	2.5e-23	T	31-10-2019	IPR011656	Notch, NODP domain	GO:0007219|GO:0007275|GO:0016021|GO:0030154	Reactome: R-HSA-1912399|Reactome: R-HSA-1912408|Reactome: R-HSA-1912420|Reactome: R-HSA-350054|Reactome: R-HSA-5083630
Mmel_00010638-RA	50cba9db5ac816dccefd757c0b9eebb3	799	Pfam	PF01465	GRIP domain	724	766	2e-14	T	31-10-2019	IPR000237	GRIP domain
Mmel_00009843-RA	21df0c9d5b61b21ed9422c982f8bc101	1067	Pfam	PF07703	Alpha-2-macroglobulin family N-terminal region	432	580	4.2e-29	T	31-10-2019	IPR011625	Alpha-2-macroglobulin, N-terminal 2
Mmel_00009843-RA	21df0c9d5b61b21ed9422c982f8bc101	1067	Pfam	PF10569	Alpha-macro-globulin thiol-ester bond-forming region	937	966	1.2e-16	T	31-10-2019	IPR019565	Alpha-2-macroglobulin, thiol-ester bond-forming
Mmel_00009843-RA	21df0c9d5b61b21ed9422c982f8bc101	1067	Pfam	PF00207	Alpha-2-macroglobulin family	714	804	7.1e-31	T	31-10-2019	IPR001599	Alpha-2-macroglobulin	GO:0004866
Mmel_00009843-RA	21df0c9d5b61b21ed9422c982f8bc101	1067	Pfam	PF07678	A-macroglobulin complement component	987	1067	4.8e-29	T	31-10-2019	IPR011626	Alpha-macroglobulin complement component	GO:0005615
Mmel_00009843-RA	21df0c9d5b61b21ed9422c982f8bc101	1067	Pfam	PF01835	MG2 domain	101	193	1e-19	T	31-10-2019	IPR002890	Alpha-2-macroglobulin, N-terminal	GO:0004866
Mmel_00013269-RA	e1e5b8019e4ab16b240597cf43055eb2	186	Pfam	PF01207	Dihydrouridine synthase (Dus)	9	69	4.9e-14	T	31-10-2019	IPR001269	tRNA-dihydrouridine synthase	GO:0008033|GO:0017150|GO:0050660|GO:0055114
Mmel_00000622-RA	519c791af6c11babbd55233c008b4d32	3205	Pfam	PF06009	Laminin Domain II	2168	2296	1.3e-37	T	31-10-2019	IPR010307	Laminin domain II	GO:0007155	Reactome: R-HSA-3000157|Reactome: R-HSA-3000171|Reactome: R-HSA-3000178|Reactome: R-HSA-8874081
Mmel_00000622-RA	519c791af6c11babbd55233c008b4d32	3205	Pfam	PF00053	Laminin EGF domain	520	570	1.3e-07	T	31-10-2019	IPR002049	Laminin EGF domain
Mmel_00000622-RA	519c791af6c11babbd55233c008b4d32	3205	Pfam	PF00053	Laminin EGF domain	426	467	6.5e-08	T	31-10-2019	IPR002049	Laminin EGF domain
Mmel_00000622-RA	519c791af6c11babbd55233c008b4d32	3205	Pfam	PF00053	Laminin EGF domain	573	611	0.0003	T	31-10-2019	IPR002049	Laminin EGF domain
Mmel_00000622-RA	519c791af6c11babbd55233c008b4d32	3205	Pfam	PF00053	Laminin EGF domain	1285	1333	6.6e-10	T	31-10-2019	IPR002049	Laminin EGF domain
Mmel_00000622-RA	519c791af6c11babbd55233c008b4d32	3205	Pfam	PF00053	Laminin EGF domain	1192	1227	0.042	T	31-10-2019	IPR002049	Laminin EGF domain
Mmel_00000622-RA	519c791af6c11babbd55233c008b4d32	3205	Pfam	PF00053	Laminin EGF domain	237	284	0.00064	T	31-10-2019	IPR002049	Laminin EGF domain
Mmel_00000622-RA	519c791af6c11babbd55233c008b4d32	3205	Pfam	PF00053	Laminin EGF domain	296	351	6.6e-05	T	31-10-2019	IPR002049	Laminin EGF domain
Mmel_00000622-RA	519c791af6c11babbd55233c008b4d32	3205	Pfam	PF00053	Laminin EGF domain	1569	1613	3.6e-07	T	31-10-2019	IPR002049	Laminin EGF domain
Mmel_00000622-RA	519c791af6c11babbd55233c008b4d32	3205	Pfam	PF00053	Laminin EGF domain	468	517	5.3e-07	T	31-10-2019	IPR002049	Laminin EGF domain
Mmel_00000622-RA	519c791af6c11babbd55233c008b4d32	3205	Pfam	PF00053	Laminin EGF domain	1236	1281	9.5e-10	T	31-10-2019	IPR002049	Laminin EGF domain
Mmel_00000622-RA	519c791af6c11babbd55233c008b4d32	3205	Pfam	PF00053	Laminin EGF domain	1146	1188	7.8e-10	T	31-10-2019	IPR002049	Laminin EGF domain
Mmel_00000622-RA	519c791af6c11babbd55233c008b4d32	3205	Pfam	PF00053	Laminin EGF domain	1616	1666	1.2e-07	T	31-10-2019	IPR002049	Laminin EGF domain
Mmel_00000622-RA	519c791af6c11babbd55233c008b4d32	3205	Pfam	PF00053	Laminin EGF domain	1535	1559	0.013	T	31-10-2019	IPR002049	Laminin EGF domain
Mmel_00000622-RA	519c791af6c11babbd55233c008b4d32	3205	Pfam	PF06008	Laminin Domain I	1729	1986	1.5e-54	T	31-10-2019	IPR009254	Laminin alpha, domain I	GO:0005102|GO:0030155|GO:0030334|GO:0045995	Reactome: R-HSA-3000157|Reactome: R-HSA-3000171|Reactome: R-HSA-3000178|Reactome: R-HSA-8874081
Mmel_00000622-RA	519c791af6c11babbd55233c008b4d32	3205	Pfam	PF02210	Laminin G domain	2677	2780	2.8e-09	T	31-10-2019	IPR001791	Laminin G domain
Mmel_00000622-RA	519c791af6c11babbd55233c008b4d32	3205	Pfam	PF02210	Laminin G domain	2509	2621	1e-14	T	31-10-2019	IPR001791	Laminin G domain
Mmel_00000622-RA	519c791af6c11babbd55233c008b4d32	3205	Pfam	PF02210	Laminin G domain	3058	3182	1.5e-19	T	31-10-2019	IPR001791	Laminin G domain
Mmel_00000622-RA	519c791af6c11babbd55233c008b4d32	3205	Pfam	PF02210	Laminin G domain	2888	3009	3.8e-25	T	31-10-2019	IPR001791	Laminin G domain
Mmel_00000622-RA	519c791af6c11babbd55233c008b4d32	3205	Pfam	PF02210	Laminin G domain	2316	2449	5e-06	T	31-10-2019	IPR001791	Laminin G domain
Mmel_00000622-RA	519c791af6c11babbd55233c008b4d32	3205	Pfam	PF00052	Laminin B (Domain IV)	1398	1534	2.4e-29	T	31-10-2019	IPR000034	Laminin IV		Reactome: R-HSA-3000157|Reactome: R-HSA-3000171|Reactome: R-HSA-8874081
Mmel_00000622-RA	519c791af6c11babbd55233c008b4d32	3205	Pfam	PF00055	Laminin N-terminal (Domain VI)	36	235	5.5e-70	T	31-10-2019	IPR008211	Laminin, N-terminal
Mmel_00000200-RA	ad9029f1e6b48abd4536898b2fcd86fa	2206	Pfam	PF01826	Trypsin Inhibitor like cysteine rich domain	1659	1717	3.1e-06	T	31-10-2019	IPR002919	Trypsin Inhibitor-like, cysteine rich domain
Mmel_00000200-RA	ad9029f1e6b48abd4536898b2fcd86fa	2206	Pfam	PF00094	von Willebrand factor type D domain	400	545	2.5e-25	T	31-10-2019	IPR001846	von Willebrand factor, type D domain
Mmel_00000200-RA	ad9029f1e6b48abd4536898b2fcd86fa	2206	Pfam	PF00094	von Willebrand factor type D domain	1389	1552	9.9e-15	T	31-10-2019	IPR001846	von Willebrand factor, type D domain
Mmel_00000200-RA	ad9029f1e6b48abd4536898b2fcd86fa	2206	Pfam	PF00094	von Willebrand factor type D domain	31	65	2.8e-08	T	31-10-2019	IPR001846	von Willebrand factor, type D domain
Mmel_00000200-RA	ad9029f1e6b48abd4536898b2fcd86fa	2206	Pfam	PF05270	Alpha-L-arabinofuranosidase B (ABFB) domain	714	801	4.2e-06	T	31-10-2019	IPR007934	Alpha-L-arabinofuranosidase B, arabinose-binding domain	GO:0046373|GO:0046556
Mmel_00000200-RA	ad9029f1e6b48abd4536898b2fcd86fa	2206	Pfam	PF08742	C8 domain	1593	1655	9e-09	T	31-10-2019	IPR014853	Uncharacterised domain, cysteine-rich
Mmel_00000200-RA	ad9029f1e6b48abd4536898b2fcd86fa	2206	Pfam	PF08742	C8 domain	587	653	1.3e-13	T	31-10-2019	IPR014853	Uncharacterised domain, cysteine-rich
Mmel_00000200-RA	ad9029f1e6b48abd4536898b2fcd86fa	2206	Pfam	PF08742	C8 domain	219	281	3.9e-13	T	31-10-2019	IPR014853	Uncharacterised domain, cysteine-rich
Mmel_00008503-RA	fa64b4ab87e270298389829ae3579d3d	75	Pfam	PF00050	Kazal-type serine protease inhibitor domain	39	73	8.4e-12	T	31-10-2019	IPR002350	Kazal domain	GO:0005515
Mmel_00007255-RA	883fbd55db42f58f8f116b8f4ac2fd91	286	Pfam	PF05739	SNARE domain	227	279	6.3e-19	T	31-10-2019	IPR000727	Target SNARE coiled-coil homology domain
Mmel_00007255-RA	883fbd55db42f58f8f116b8f4ac2fd91	286	Pfam	PF00804	Syntaxin	44	226	2.5e-08	T	31-10-2019	IPR006011	Syntaxin, N-terminal domain	GO:0016020
Mmel_00008514-RA	a5495015d9c51b984a0284a3c0a753ad	383	Pfam	PF05653	Magnesium transporter NIPA	46	338	4.6e-131	T	31-10-2019	IPR008521	Magnesium transporter NIPA	GO:0015095|GO:0015693|GO:0016021	Reactome: R-HSA-5223345
Mmel_00007841-RA	b4941de85a5a4b272630ae719397ebe3	416	Pfam	PF02932	Neurotransmitter-gated ion-channel transmembrane region	232	322	7.4e-31	T	31-10-2019	IPR006029	Neurotransmitter-gated ion-channel transmembrane domain	GO:0006811|GO:0016021
Mmel_00007841-RA	b4941de85a5a4b272630ae719397ebe3	416	Pfam	PF02931	Neurotransmitter-gated ion-channel ligand binding domain	26	224	1.1e-51	T	31-10-2019	IPR006202	Neurotransmitter-gated ion-channel ligand-binding domain	GO:0005230|GO:0006811|GO:0016021
Mmel_00002878-RA	c051f74d65967fba29349d6b5b4dc6fd	450	Pfam	PF00638	RanBP1 domain	336	448	2e-10	T	31-10-2019	IPR000156	Ran binding domain	GO:0046907
Mmel_00002878-RA	c051f74d65967fba29349d6b5b4dc6fd	450	Pfam	PF08911	NUP50 (Nucleoporin 50 kDa)	5	67	3.1e-22	T	31-10-2019	IPR015007	Nuclear pore complex, NUP2/50/61	GO:0005643	Reactome: R-HSA-1169408|Reactome: R-HSA-159227|Reactome: R-HSA-159230|Reactome: R-HSA-159231|Reactome: R-HSA-159236|Reactome: R-HSA-165054|Reactome: R-HSA-168271|Reactome: R-HSA-168276|Reactome: R-HSA-168325|Reactome: R-HSA-168333|Reactome: R-HSA-170822|Reactome: R-HSA-180746|Reactome: R-HSA-180910|Reactome: R-HSA-191859|Reactome: R-HSA-3108214|Reactome: R-HSA-3301854|Reactome: R-HSA-3371453|Reac…
Mmel_00007009-RA	e26983ea5b554177adc0f71169380267	593	Pfam	PF11816	Domain of unknown function (DUF3337)	425	589	2.3e-48	T	31-10-2019	IPR021772	Protein of unknown function DUF3337		Reactome: R-HSA-110314|Reactome: R-HSA-5689880|Reactome: R-HSA-6783310
Mmel_00007009-RA	e26983ea5b554177adc0f71169380267	593	Pfam	PF00400	WD domain, G-beta repeat	106	136	0.065	T	31-10-2019	IPR001680	WD40 repeat	GO:0005515
Mmel_00007009-RA	e26983ea5b554177adc0f71169380267	593	Pfam	PF00400	WD domain, G-beta repeat	152	187	0.018	T	31-10-2019	IPR001680	WD40 repeat	GO:0005515
Mmel_00000844-RA	9375f31ccc7e9d345ac90f609f5fe825	630	Pfam	PF00254	FKBP-type peptidyl-prolyl cis-trans isomerase	218	309	7.2e-25	T	31-10-2019	IPR001179	FKBP-type peptidyl-prolyl cis-trans isomerase domain
Mmel_00000844-RA	9375f31ccc7e9d345ac90f609f5fe825	630	Pfam	PF00254	FKBP-type peptidyl-prolyl cis-trans isomerase	444	532	1.2e-24	T	31-10-2019	IPR001179	FKBP-type peptidyl-prolyl cis-trans isomerase domain
Mmel_00000844-RA	9375f31ccc7e9d345ac90f609f5fe825	630	Pfam	PF00254	FKBP-type peptidyl-prolyl cis-trans isomerase	331	419	1.9e-26	T	31-10-2019	IPR001179	FKBP-type peptidyl-prolyl cis-trans isomerase domain
Mmel_00000844-RA	9375f31ccc7e9d345ac90f609f5fe825	630	Pfam	PF00254	FKBP-type peptidyl-prolyl cis-trans isomerase	60	197	7.4e-23	T	31-10-2019	IPR001179	FKBP-type peptidyl-prolyl cis-trans isomerase domain
Mmel_00010805-RA	d42dbde860584d3286298172442ac73c	545	Pfam	PF07654	Immunoglobulin C1-set domain	433	504	2.1e-17	T	31-10-2019	IPR003597	Immunoglobulin C1-set
Mmel_00010805-RA	d42dbde860584d3286298172442ac73c	545	Pfam	PF16497	MHC-I family domain	43	232	9.4e-29	T	31-10-2019	IPR011161	MHC class I-like antigen recognition-like		Reactome: R-HSA-1236974|Reactome: R-HSA-1236977|Reactome: R-HSA-198933|Reactome: R-HSA-877300|Reactome: R-HSA-909733|Reactome: R-HSA-983170
Mmel_00010181-RA	0d825d73d8d11b7736902f01c6f9cf25	468	Pfam	PF00856	SET domain	18	239	6.7e-12	T	31-10-2019	IPR001214	SET domain	GO:0005515
Mmel_00010181-RA	0d825d73d8d11b7736902f01c6f9cf25	468	Pfam	PF01753	MYND finger	52	90	9.5e-09	T	31-10-2019	IPR002893	Zinc finger, MYND-type
Mmel_00000283-RA	1e69fcee3cfcffaec3705600c7eb1340	3008	Pfam	PF07539	Down-regulated in metastasis	923	1545	4.6e-180	T	31-10-2019	IPR011430	Down-regulated-in-metastasis protein		Reactome: R-HSA-6790901|Reactome: R-HSA-6791226
Mmel_00001057-RA	0f34791f132d10f9353215b7799b69e2	766	Pfam	PF07988	LMSTEN motif	271	316	4e-26	T	31-10-2019	IPR012642	Transcription regulator Wos2-domain	GO:0006355
Mmel_00001057-RA	0f34791f132d10f9353215b7799b69e2	766	Pfam	PF09316	C-myb, C-terminal	523	686	4.4e-75	T	31-10-2019	IPR015395	C-myb, C-terminal
Mmel_00001057-RA	0f34791f132d10f9353215b7799b69e2	766	Pfam	PF00249	Myb-like DNA-binding domain	146	189	1.1e-16	T	31-10-2019	IPR001005	SANT/Myb domain
Mmel_00001057-RA	0f34791f132d10f9353215b7799b69e2	766	Pfam	PF00249	Myb-like DNA-binding domain	94	140	8.6e-19	T	31-10-2019	IPR001005	SANT/Myb domain
Mmel_00001057-RA	0f34791f132d10f9353215b7799b69e2	766	Pfam	PF00249	Myb-like DNA-binding domain	42	88	4.1e-17	T	31-10-2019	IPR001005	SANT/Myb domain
Mmel_00013175-RA	54ae88b890926feb063ac845551214b4	120	Pfam	PF05915	Eukaryotic protein of unknown function (DUF872)	12	118	7.2e-21	T	31-10-2019	IPR008590	Protein of unknown function DUF872, transmembrane
Mmel_00000414-RA	1e6c988804d465aeb21e70e04f0ce047	2795	Pfam	PF00632	HECT-domain (ubiquitin-transferase)	2422	2718	6e-65	T	31-10-2019	IPR000569	HECT domain	GO:0004842	MetaCyc: PWY-7511|Reactome: R-HSA-983168
Mmel_00000414-RA	1e6c988804d465aeb21e70e04f0ce047	2795	Pfam	PF11547	E3 ubiquitin ligase EDD	152	203	2.3e-30	T	31-10-2019	IPR024725	E3 ubiquitin ligase EDD, ubiquitin-associated domain	GO:0043130	MetaCyc: PWY-7511
Mmel_00000414-RA	1e6c988804d465aeb21e70e04f0ce047	2795	Pfam	PF00658	Poly-adenylate binding protein, unique domain	2337	2394	8.2e-20	T	31-10-2019	IPR002004	Polyadenylate-binding protein/Hyperplastic disc protein	GO:0003723
Mmel_00006479-RA	cd5f3c347e969f97aafe835fe70231e2	186	Pfam	PF07647	SAM domain (Sterile alpha motif)	146	185	3.5e-10	T	31-10-2019	IPR001660	Sterile alpha motif domain	GO:0005515
Mmel_00006479-RA	cd5f3c347e969f97aafe835fe70231e2	186	Pfam	PF14575	Ephrin type-A receptor 2 transmembrane domain	12	38	4.8e-14	T	31-10-2019	IPR027936	Ephrin receptor, transmembrane domain		Reactome: R-HSA-2682334|Reactome: R-HSA-3928665
Mmel_00006479-RA	cd5f3c347e969f97aafe835fe70231e2	186	Pfam	PF07714	Protein tyrosine kinase	71	115	7.8e-10	T	31-10-2019	IPR001245	Serine-threonine/tyrosine-protein kinase, catalytic domain	GO:0004672|GO:0006468
Mmel_00001935-RA	ed982ef2408e7ab3dfee43a8bfce906d	628	Pfam	PF13249	Squalene-hopene cyclase N-terminal domain	22	244	1.7e-31	T	31-10-2019	IPR032697	Squalene cyclase, N-terminal		Reactome: R-HSA-191273|Reactome: R-HSA-2426168
Mmel_00001935-RA	ed982ef2408e7ab3dfee43a8bfce906d	628	Pfam	PF13243	Squalene-hopene cyclase C-terminal domain	260	595	3.5e-52	T	31-10-2019	IPR032696	Squalene cyclase, C-terminal		Reactome: R-HSA-191273|Reactome: R-HSA-2426168
Mmel_00008894-RA	ac939d8c466e5faad37e42e73106c65f	3903	Pfam	PF02138	Beige/BEACH domain	3232	3520	3.1e-111	T	31-10-2019	IPR000409	BEACH domain
Mmel_00008894-RA	ac939d8c466e5faad37e42e73106c65f	3903	Pfam	PF00400	WD domain, G-beta repeat	3711	3746	0.095	T	31-10-2019	IPR001680	WD40 repeat	GO:0005515
Mmel_00008894-RA	ac939d8c466e5faad37e42e73106c65f	3903	Pfam	PF14844	PH domain associated with Beige/BEACH	3118	3212	1.3e-21	T	31-10-2019	IPR023362	PH-BEACH domain
Mmel_00001034-RA	00793f604f5c297be706ef4f7e5bc79c	106	Pfam	PF10469	AKAP7 2'5' RNA ligase-like domain	35	96	7.9e-09	T	31-10-2019	IPR019510	Protein kinase A anchor protein, nuclear localisation signal domain
Mmel_00006655-RA	8555ee4372f98e5a8f1326ab6916b7e9	1383	Pfam	PF00096	Zinc finger, C2H2 type	1204	1226	0.0012	T	31-10-2019
Mmel_00006655-RA	8555ee4372f98e5a8f1326ab6916b7e9	1383	Pfam	PF00096	Zinc finger, C2H2 type	704	727	0.0033	T	31-10-2019
Mmel_00006655-RA	8555ee4372f98e5a8f1326ab6916b7e9	1383	Pfam	PF00096	Zinc finger, C2H2 type	592	614	0.0024	T	31-10-2019
Mmel_00006655-RA	8555ee4372f98e5a8f1326ab6916b7e9	1383	Pfam	PF00096	Zinc finger, C2H2 type	676	698	1.7e-05	T	31-10-2019
Mmel_00006655-RA	8555ee4372f98e5a8f1326ab6916b7e9	1383	Pfam	PF00096	Zinc finger, C2H2 type	1232	1254	0.0096	T	31-10-2019
Mmel_00006655-RA	8555ee4372f98e5a8f1326ab6916b7e9	1383	Pfam	PF00096	Zinc finger, C2H2 type	258	278	0.0067	T	31-10-2019
Mmel_00006655-RA	8555ee4372f98e5a8f1326ab6916b7e9	1383	Pfam	PF00096	Zinc finger, C2H2 type	1150	1170	0.0004	T	31-10-2019
Mmel_00006655-RA	8555ee4372f98e5a8f1326ab6916b7e9	1383	Pfam	PF14938	Soluble NSF attachment protein, SNAP	541	581	4.9e-08	T	31-10-2019
Mmel_00006655-RA	8555ee4372f98e5a8f1326ab6916b7e9	1383	Pfam	PF00651	BTB/POZ domain	769	876	1.7e-21	T	31-10-2019	IPR000210	BTB/POZ domain	GO:0005515
Mmel_00006655-RA	8555ee4372f98e5a8f1326ab6916b7e9	1383	Pfam	PF00651	BTB/POZ domain	22	128	1.6e-23	T	31-10-2019	IPR000210	BTB/POZ domain	GO:0005515
Mmel_00006655-RA	8555ee4372f98e5a8f1326ab6916b7e9	1383	Pfam	PF12874	Zinc-finger of C2H2 type	483	501	0.051	T	31-10-2019
Mmel_00009002-RA	e334ebc6614475ac3ddd56e8783b7e03	889	Pfam	PF08763	Voltage gated calcium channel IQ domain	289	363	7.7e-31	T	31-10-2019	IPR014873	Voltage-dependent calcium channel, alpha-1 subunit, IQ domain
Mmel_00009002-RA	e334ebc6614475ac3ddd56e8783b7e03	889	Pfam	PF16885	Voltage-gated calcium channel subunit alpha, C-term	384	888	7.4e-75	T	31-10-2019	IPR031688	Voltage-gated calcium channel subunit alpha, C-terminal		Reactome: R-HSA-5576892|Reactome: R-HSA-5576893
Mmel_00009002-RA	e334ebc6614475ac3ddd56e8783b7e03	889	Pfam	PF00520	Ion transport protein	35	197	1e-42	T	31-10-2019	IPR005821	Ion transport domain	GO:0005216|GO:0006811|GO:0016020|GO:0055085
Mmel_00009002-RA	e334ebc6614475ac3ddd56e8783b7e03	889	Pfam	PF16905	Voltage-dependent L-type calcium channel, IQ-associated	218	288	4.3e-36	T	31-10-2019	IPR031649	Voltage-dependent L-type calcium channel, IQ-associated domain
Mmel_00012344-RA	35f2079caa1abc503a597bff4baaf83a	233	Pfam	PF00018	SH3 domain	67	113	2.1e-15	T	31-10-2019	IPR001452	SH3 domain	GO:0005515
Mmel_00012344-RA	35f2079caa1abc503a597bff4baaf83a	233	Pfam	PF07653	Variant SH3 domain	168	221	2.1e-10	T	31-10-2019	IPR001452	SH3 domain	GO:0005515
Mmel_00012976-RA	bec89f2c3dccce9835632889a4f99087	280	Pfam	PF00098	Zinc knuckle	200	216	6.3e-07	T	31-10-2019	IPR001878	Zinc finger, CCHC-type	GO:0003676|GO:0008270
Mmel_00012976-RA	bec89f2c3dccce9835632889a4f99087	280	Pfam	PF00098	Zinc knuckle	239	255	4.1e-06	T	31-10-2019	IPR001878	Zinc finger, CCHC-type	GO:0003676|GO:0008270
Mmel_00012976-RA	bec89f2c3dccce9835632889a4f99087	280	Pfam	PF00098	Zinc knuckle	176	192	1.5e-06	T	31-10-2019	IPR001878	Zinc finger, CCHC-type	GO:0003676|GO:0008270
Mmel_00012976-RA	bec89f2c3dccce9835632889a4f99087	280	Pfam	PF00098	Zinc knuckle	260	275	1.8e-07	T	31-10-2019	IPR001878	Zinc finger, CCHC-type	GO:0003676|GO:0008270
Mmel_00012976-RA	bec89f2c3dccce9835632889a4f99087	280	Pfam	PF00098	Zinc knuckle	220	237	2.2e-06	T	31-10-2019	IPR001878	Zinc finger, CCHC-type	GO:0003676|GO:0008270
Mmel_00012976-RA	bec89f2c3dccce9835632889a4f99087	280	Pfam	PF00098	Zinc knuckle	156	171	3.3e-07	T	31-10-2019	IPR001878	Zinc finger, CCHC-type	GO:0003676|GO:0008270
Mmel_00012976-RA	bec89f2c3dccce9835632889a4f99087	280	Pfam	PF06246	Isy1-like splicing family	27	147	2.6e-56	T	31-10-2019	IPR009360	Pre-mRNA-splicing factor Isy1	GO:0000350	Reactome: R-HSA-6781823|Reactome: R-HSA-6781827|Reactome: R-HSA-6782135|Reactome: R-HSA-6782210|Reactome: R-HSA-72163
Mmel_00015091-RA	d5993275911720ea4a3a56020e64917b	81	Pfam	PF00069	Protein kinase domain	2	67	1.2e-15	T	31-10-2019	IPR000719	Protein kinase domain	GO:0004672|GO:0005524|GO:0006468
Mmel_00014892-RA	9811e733e7ce208381341faa48ec477a	124	Pfam	PF07677	A-macroglobulin receptor	40	122	3.7e-26	T	31-10-2019	IPR009048	Alpha-macroglobulin, receptor-binding	GO:0005576
Mmel_00003264-RA	a252b6803e44478f1e9d3a828ae17986	479	Pfam	PF00618	RasGEF N-terminal motif	44	140	4.3e-16	T	31-10-2019	IPR000651	Ras-like guanine nucleotide exchange factor, N-terminal
Mmel_00003264-RA	a252b6803e44478f1e9d3a828ae17986	479	Pfam	PF00617	RasGEF domain	214	407	3.8e-53	T	31-10-2019	IPR001895	Ras guanine-nucleotide exchange factors catalytic domain	GO:0005085|GO:0007264
Mmel_00004052-RA	bf4deb46d48b0aeaaab13448106c0c3e	1482	Pfam	PF00788	Ras association (RalGDS/AF-6) domain	591	674	3.1e-12	T	31-10-2019	IPR000159	Ras-associating (RA) domain	GO:0007165
Mmel_00004052-RA	bf4deb46d48b0aeaaab13448106c0c3e	1482	Pfam	PF00595	PDZ domain (Also known as DHR or GLGF)	373	450	6.6e-11	T	31-10-2019	IPR001478	PDZ domain	GO:0005515
Mmel_00004052-RA	bf4deb46d48b0aeaaab13448106c0c3e	1482	Pfam	PF00617	RasGEF domain	704	882	1.2e-50	T	31-10-2019	IPR001895	Ras guanine-nucleotide exchange factors catalytic domain	GO:0005085|GO:0007264
Mmel_00004052-RA	bf4deb46d48b0aeaaab13448106c0c3e	1482	Pfam	PF00618	RasGEF N-terminal motif	259	345	6.7e-13	T	31-10-2019	IPR000651	Ras-like guanine nucleotide exchange factor, N-terminal
Mmel_00003784-RA	97ef45df85b5c06528c1beb18fe0ae88	117	Pfam	PF03522	Solute carrier family 12	74	117	2.7e-24	T	31-10-2019	IPR018491	SLC12A transporter, C-terminal	GO:0005215|GO:0006811|GO:0016020	Reactome: R-HSA-426117
Mmel_00011641-RA	e20cf6088d36bcebd4be729406a33aa4	441	Pfam	PF07714	Protein tyrosine kinase	140	396	2.8e-65	T	31-10-2019	IPR001245	Serine-threonine/tyrosine-protein kinase, catalytic domain	GO:0004672|GO:0006468
Mmel_00007168-RA	4cf9f0beca56af0ed58613c673cdf514	101	Pfam	PF00578	AhpC/TSA family	2	42	9.6e-09	T	31-10-2019	IPR000866	Alkyl hydroperoxide reductase subunit C/ Thiol specific antioxidant	GO:0016209|GO:0016491|GO:0055114	KEGG: 00480+1.11.1.15|Reactome: R-HSA-3299685
Mmel_00007168-RA	4cf9f0beca56af0ed58613c673cdf514	101	Pfam	PF10417	C-terminal domain of 1-Cys peroxiredoxin	63	98	6.2e-15	T	31-10-2019	IPR019479	Peroxiredoxin, C-terminal	GO:0051920|GO:0055114	KEGG: 00480+1.11.1.15|Reactome: R-HSA-3299685
Mmel_00011944-RA	f3d95679de6d15cc39ab865babb51b1b	114	Pfam	PF01247	Ribosomal protein L35Ae	9	108	3.7e-47	T	31-10-2019	IPR001780	Ribosomal protein L35A	GO:0003735|GO:0005622|GO:0005840|GO:0006412	Reactome: R-HSA-156827|Reactome: R-HSA-156902|Reactome: R-HSA-1799339|Reactome: R-HSA-192823|Reactome: R-HSA-2408557|Reactome: R-HSA-6791226|Reactome: R-HSA-72689|Reactome: R-HSA-72706|Reactome: R-HSA-72764|Reactome: R-HSA-9010553|Reactome: R-HSA-975956|Reactome: R-HSA-975957
Mmel_00013290-RA	ebfea9618a544a0645910edb3f80f051	171	Pfam	PF00621	RhoGEF domain	9	81	7.1e-18	T	31-10-2019	IPR000219	Dbl homology (DH) domain	GO:0005089|GO:0035023
Mmel_00002701-RA	abf6d593388c7cfb3dcb38d7e91368f9	339	Pfam	PF02826	D-isomer specific 2-hydroxyacid dehydrogenase, NAD binding domain	120	299	8.6e-60	T	31-10-2019	IPR006140	D-isomer specific 2-hydroxyacid dehydrogenase, NAD-binding domain	GO:0051287|GO:0055114
Mmel_00002701-RA	abf6d593388c7cfb3dcb38d7e91368f9	339	Pfam	PF00389	D-isomer specific 2-hydroxyacid dehydrogenase, catalytic domain	29	323	9e-21	T	31-10-2019	IPR006139	D-isomer specific 2-hydroxyacid dehydrogenase, catalytic domain	GO:0008152|GO:0016616|GO:0051287|GO:0055114
Mmel_00008338-RA	9efe929484ad41b0b80b2355722830c2	520	Pfam	PF02190	ATP-dependent protease La (LON) substrate-binding domain	325	512	9.1e-21	T	31-10-2019	IPR003111	Lon, substrate-binding domain
Mmel_00008338-RA	9efe929484ad41b0b80b2355722830c2	520	Pfam	PF13923	Zinc finger, C3HC4 type (RING finger)	235	273	5.1e-09	T	31-10-2019
Mmel_00006686-RA	cb4fa7c4f4dbe716f1e6727cfd012f68	1178	Pfam	PF00168	C2 domain	770	879	9.3e-09	T	31-10-2019	IPR000008	C2 domain
Mmel_00009968-RA	3e0e83e89ecd84339a47a6645df72161	1214	Pfam	PF00225	Kinesin motor domain	35	333	2.5e-112	T	31-10-2019	IPR001752	Kinesin motor domain	GO:0003777|GO:0005524|GO:0007018|GO:0008017	Reactome: R-HSA-6811434|Reactome: R-HSA-983189
Mmel_00009968-RA	3e0e83e89ecd84339a47a6645df72161	1214	Pfam	PF12423	Kinesin protein 1B	741	787	1.2e-16	T	31-10-2019	IPR022140	Kinesin-like KIF1-type		Reactome: R-HSA-6811434|Reactome: R-HSA-983189
Mmel_00009968-RA	3e0e83e89ecd84339a47a6645df72161	1214	Pfam	PF16183	Kinesin-associated	375	454	1.2e-19	T	31-10-2019	IPR032405	Kinesin-associated
Mmel_00009968-RA	3e0e83e89ecd84339a47a6645df72161	1214	Pfam	PF00498	FHA domain	457	520	2.3e-07	T	31-10-2019	IPR000253	Forkhead-associated (FHA) domain	GO:0005515
Mmel_00010699-RA	fe84ce08717ec8652b4c7b58269778ba	874	Pfam	PF00324	Amino acid permease	494	610	7.3e-09	T	31-10-2019	IPR004841	Amino acid permease/ SLC12A domain	GO:0016020|GO:0055085
Mmel_00010699-RA	fe84ce08717ec8652b4c7b58269778ba	874	Pfam	PF00324	Amino acid permease	22	180	2.2e-19	T	31-10-2019	IPR004841	Amino acid permease/ SLC12A domain	GO:0016020|GO:0055085
Mmel_00010699-RA	fe84ce08717ec8652b4c7b58269778ba	874	Pfam	PF03522	Solute carrier family 12	194	312	8.6e-17	T	31-10-2019	IPR018491	SLC12A transporter, C-terminal	GO:0005215|GO:0006811|GO:0016020	Reactome: R-HSA-426117
Mmel_00010699-RA	fe84ce08717ec8652b4c7b58269778ba	874	Pfam	PF03522	Solute carrier family 12	806	874	5.6e-13	T	31-10-2019	IPR018491	SLC12A transporter, C-terminal	GO:0005215|GO:0006811|GO:0016020	Reactome: R-HSA-426117
Mmel_00010699-RA	fe84ce08717ec8652b4c7b58269778ba	874	Pfam	PF03522	Solute carrier family 12	323	457	1.2e-18	T	31-10-2019	IPR018491	SLC12A transporter, C-terminal	GO:0005215|GO:0006811|GO:0016020	Reactome: R-HSA-426117
Mmel_00013367-RA	14e6efef1bb0ffe288f79fb0f72845eb	269	Pfam	PF03134	TB2/DP1, HVA22 family	19	94	8.3e-28	T	31-10-2019	IPR004345	TB2/DP1/HVA22-related protein		Reactome: R-HSA-381753
Mmel_00006417-RA	6658a85f076ef7f693af5cb33657e648	2042	Pfam	PF14429	C2 domain in Dock180 and Zizimin proteins	514	696	8.1e-51	T	31-10-2019	IPR027007	DHR-1 domain		Reactome: R-HSA-983231
Mmel_00006417-RA	6658a85f076ef7f693af5cb33657e648	2042	Pfam	PF06920	Dock homology region 2	1498	2019	3.8e-212	T	31-10-2019	IPR010703	Dedicator of cytokinesis, C-terminal		Reactome: R-HSA-983231
Mmel_00006417-RA	6658a85f076ef7f693af5cb33657e648	2042	Pfam	PF11878	Domain of unknown function (DUF3398)	25	114	2.4e-24	T	31-10-2019	IPR021816	Dedicator of cytokinesis C/D, N-terminal		Reactome: R-HSA-983231
Mmel_00009487-RA	c8441ac996f748698ddb593a47ebe61e	911	Pfam	PF00023	Ankyrin repeat	760	783	0.0026	T	31-10-2019	IPR002110	Ankyrin repeat	GO:0005515
Mmel_00009487-RA	c8441ac996f748698ddb593a47ebe61e	911	Pfam	PF00023	Ankyrin repeat	791	823	8.8e-06	T	31-10-2019	IPR002110	Ankyrin repeat	GO:0005515
Mmel_00009487-RA	c8441ac996f748698ddb593a47ebe61e	911	Pfam	PF13857	Ankyrin repeats (many copies)	364	414	3.4e-08	T	31-10-2019
Mmel_00009487-RA	c8441ac996f748698ddb593a47ebe61e	911	Pfam	PF12796	Ankyrin repeats (3 copies)	422	497	6.8e-13	T	31-10-2019	IPR020683	Ankyrin repeat-containing domain
Mmel_00009487-RA	c8441ac996f748698ddb593a47ebe61e	911	Pfam	PF12796	Ankyrin repeats (3 copies)	664	756	6.4e-15	T	31-10-2019	IPR020683	Ankyrin repeat-containing domain
Mmel_00009487-RA	c8441ac996f748698ddb593a47ebe61e	911	Pfam	PF12796	Ankyrin repeats (3 copies)	538	623	1.8e-06	T	31-10-2019	IPR020683	Ankyrin repeat-containing domain
Mmel_00009487-RA	c8441ac996f748698ddb593a47ebe61e	911	Pfam	PF13637	Ankyrin repeats (many copies)	829	876	1e-08	T	31-10-2019
Mmel_00008437-RA	1f5375f73697d444f8e3146022a1ff41	360	Pfam	PF13499	EF-hand domain pair	4	57	1.4e-07	T	31-10-2019	IPR002048	EF-hand domain	GO:0005509
Mmel_00008437-RA	1f5375f73697d444f8e3146022a1ff41	360	Pfam	PF01694	Rhomboid family	163	316	2.2e-34	T	31-10-2019	IPR022764	Peptidase S54, rhomboid domain	GO:0004252|GO:0016021
Mmel_00005268-RA	fbbcb4bb2692f1a68ad05549083da737	710	Pfam	PF08736	FERM adjacent (FA)	285	326	6.9e-14	T	31-10-2019	IPR014847	FERM adjacent (FA)
Mmel_00005268-RA	fbbcb4bb2692f1a68ad05549083da737	710	Pfam	PF00373	FERM central domain	75	183	1.2e-18	T	31-10-2019	IPR019748	FERM central domain
Mmel_00005268-RA	fbbcb4bb2692f1a68ad05549083da737	710	Pfam	PF09380	FERM C-terminal PH-like domain	189	278	2.3e-21	T	31-10-2019	IPR018980	FERM, C-terminal PH-like domain
Mmel_00005268-RA	fbbcb4bb2692f1a68ad05549083da737	710	Pfam	PF09379	FERM N-terminal domain	8	56	1.6e-09	T	31-10-2019	IPR018979	FERM, N-terminal
Mmel_00002615-RA	3ea3f5c0b48b09185c9a11a64bacea15	591	Pfam	PF08321	PPP5 TPR repeat region	74	134	4.1e-06	T	31-10-2019	IPR013235	PPP domain		KEGG: 04658+3.1.3.16|KEGG: 04660+3.1.3.16
Mmel_00002615-RA	3ea3f5c0b48b09185c9a11a64bacea15	591	Pfam	PF13202	EF hand	434	453	0.017	T	31-10-2019	IPR002048	EF-hand domain	GO:0005509
Mmel_00002615-RA	3ea3f5c0b48b09185c9a11a64bacea15	591	Pfam	PF00149	Calcineurin-like phosphoesterase	145	348	3.2e-22	T	31-10-2019	IPR004843	Calcineurin-like phosphoesterase domain, ApaH type	GO:0016787
Mmel_00002615-RA	3ea3f5c0b48b09185c9a11a64bacea15	591	Pfam	PF13499	EF-hand domain pair	513	579	3e-10	T	31-10-2019	IPR002048	EF-hand domain	GO:0005509
Mmel_00003018-RA	86944bcc6ef761acc018198b75b7456c	1356	Pfam	PF13637	Ankyrin repeats (many copies)	382	423	1.9e-05	T	31-10-2019
Mmel_00003018-RA	86944bcc6ef761acc018198b75b7456c	1356	Pfam	PF13857	Ankyrin repeats (many copies)	522	576	3.6e-08	T	31-10-2019
Mmel_00003018-RA	86944bcc6ef761acc018198b75b7456c	1356	Pfam	PF00069	Protein kinase domain	3	257	2.5e-69	T	31-10-2019	IPR000719	Protein kinase domain	GO:0004672|GO:0005524|GO:0006468
Mmel_00003018-RA	86944bcc6ef761acc018198b75b7456c	1356	Pfam	PF12796	Ankyrin repeats (3 copies)	432	500	6.3e-15	T	31-10-2019	IPR020683	Ankyrin repeat-containing domain
Mmel_00003018-RA	86944bcc6ef761acc018198b75b7456c	1356	Pfam	PF00531	Death domain	1236	1320	1.2e-19	T	31-10-2019	IPR000488	Death domain	GO:0005515|GO:0007165
Mmel_00008397-RA	8a84d20cda276019c45f7ad12c195a72	644	Pfam	PF08778	HIF-1 alpha C terminal transactivation domain	611	644	2.2e-20	T	31-10-2019	IPR014887	HIF-1 alpha, transactivation domain, C-terminal		Reactome: R-HSA-1234158|Reactome: R-HSA-1234162|Reactome: R-HSA-1234176|Reactome: R-HSA-8849473|Reactome: R-HSA-8951664
Mmel_00008397-RA	8a84d20cda276019c45f7ad12c195a72	644	Pfam	PF08447	PAS fold	84	169	3.3e-22	T	31-10-2019	IPR013655	PAS fold-3	GO:0005515
Mmel_00008397-RA	8a84d20cda276019c45f7ad12c195a72	644	Pfam	PF11413	Hypoxia-inducible factor-1	380	408	2e-15	T	31-10-2019	IPR021537	Hypoxia-inducible factor, alpha subunit		Reactome: R-HSA-1234158|Reactome: R-HSA-1234176|Reactome: R-HSA-8951664
Mmel_00012204-RA	ceba642d4ccea7ba54ab9b81e2e49cc7	1750	Pfam	PF12820	Serine-rich domain associated with BRCT	363	519	5.9e-47	T	31-10-2019	IPR025994	BRCA1, serine-rich domain		MetaCyc: PWY-7511|Reactome: R-HSA-1221632|Reactome: R-HSA-3108214|Reactome: R-HSA-5685938|Reactome: R-HSA-5685942|Reactome: R-HSA-5689901|Reactome: R-HSA-5693554|Reactome: R-HSA-5693565|Reactome: R-HSA-5693568|Reactome: R-HSA-5693571|Reactome: R-HSA-5693579|Reactome: R-HSA-5693607|Reactome: R-HSA-5693616|Reactome: R-HSA-6796648|Reactome: R-HSA-6804756|Reactome: R-HSA-69473|Reactome: R-HSA-8953750…
Mmel_00012204-RA	ceba642d4ccea7ba54ab9b81e2e49cc7	1750	Pfam	PF00097	Zinc finger, C3HC4 type (RING finger)	24	65	4.5e-09	T	31-10-2019	IPR018957	Zinc finger, C3HC4 RING-type	GO:0046872
Mmel_00012204-RA	ceba642d4ccea7ba54ab9b81e2e49cc7	1750	Pfam	PF00533	BRCA1 C Terminus (BRCT) domain	1576	1648	3.2e-06	T	31-10-2019	IPR001357	BRCT domain
Mmel_00013479-RA	77d4a31c2bd15f4f1e2c3df15b1fa73e	334	Pfam	PF01833	IPT/TIG domain	37	120	4.5e-12	T	31-10-2019	IPR002909	IPT domain
Mmel_00013479-RA	77d4a31c2bd15f4f1e2c3df15b1fa73e	334	Pfam	PF01833	IPT/TIG domain	239	298	8.6e-07	T	31-10-2019	IPR002909	IPT domain
Mmel_00013479-RA	77d4a31c2bd15f4f1e2c3df15b1fa73e	334	Pfam	PF01833	IPT/TIG domain	124	220	1.4e-08	T	31-10-2019	IPR002909	IPT domain
Mmel_00002738-RA	0fc8d32078688d4d7f8be0ebeedc8495	497	Pfam	PF10607	CTLH/CRA C-terminal to LisH motif domain	177	482	2.5e-47	T	31-10-2019	IPR024964	CTLH/CRA C-terminal to LisH motif domain
Mmel_00002738-RA	0fc8d32078688d4d7f8be0ebeedc8495	497	Pfam	PF08513	LisH	143	166	3.8e-06	T	31-10-2019	IPR006594	LIS1 homology motif	GO:0005515
Mmel_00002738-RA	0fc8d32078688d4d7f8be0ebeedc8495	497	Pfam	PF00622	SPRY domain	4	105	7.3e-21	T	31-10-2019	IPR003877	SPRY domain	GO:0005515
Mmel_00006426-RA	f23ae9372a2820c89edee6097c26bd6d	626	Pfam	PF08144	CPL (NUC119) domain	413	550	7.7e-48	T	31-10-2019	IPR012959	CPL domain	GO:0003723
Mmel_00000682-RA	4748797629af28f45466c5fcdad855bd	239	Pfam	PF00635	MSP (Major sperm protein) domain	12	106	6.4e-31	T	31-10-2019	IPR000535	Major sperm protein (MSP) domain
Mmel_00009836-RA	1b1ebaa59ad9cda01abe4f8ae6e128ae	659	Pfam	PF01067	Calpain large subunit, domain III	379	509	7.1e-39	T	31-10-2019	IPR022682	Peptidase C2, calpain, large subunit, domain III		Reactome: R-HSA-1474228
Mmel_00009836-RA	1b1ebaa59ad9cda01abe4f8ae6e128ae	659	Pfam	PF00648	Calpain family cysteine protease	9	55	7.3e-14	T	31-10-2019	IPR001300	Peptidase C2, calpain, catalytic domain	GO:0004198|GO:0005622|GO:0006508	Reactome: R-HSA-1474228
Mmel_00009836-RA	1b1ebaa59ad9cda01abe4f8ae6e128ae	659	Pfam	PF00648	Calpain family cysteine protease	139	358	1.4e-78	T	31-10-2019	IPR001300	Peptidase C2, calpain, catalytic domain	GO:0004198|GO:0005622|GO:0006508	Reactome: R-HSA-1474228
Mmel_00009836-RA	1b1ebaa59ad9cda01abe4f8ae6e128ae	659	Pfam	PF06554	Olfactory marker protein	57	138	1.4e-25	T	31-10-2019	IPR009103	Olfactory marker protein	GO:0007165|GO:0007608
Mmel_00009836-RA	1b1ebaa59ad9cda01abe4f8ae6e128ae	659	Pfam	PF00168	C2 domain	538	623	1.5e-11	T	31-10-2019	IPR000008	C2 domain
Mmel_00003007-RA	1c2aca1b55d37033daa9a430dc586237	1183	Pfam	PF00176	SNF2 family N-terminal domain	119	447	2.9e-53	T	31-10-2019	IPR000330	SNF2-related, N-terminal domain	GO:0005524
Mmel_00003007-RA	1c2aca1b55d37033daa9a430dc586237	1183	Pfam	PF14773	Helicase-associated putative binding domain, C-terminal	1081	1121	1.6e-07	T	31-10-2019	IPR029256	Helicase-associated putative binding domain
Mmel_00003007-RA	1c2aca1b55d37033daa9a430dc586237	1183	Pfam	PF00271	Helicase conserved C-terminal domain	495	607	1.3e-19	T	31-10-2019	IPR001650	Helicase, C-terminal
Mmel_00002750-RA	45151a5053c3b9843005cd6b4d386f5e	316	Pfam	PF00478	IMP dehydrogenase / GMP reductase domain	12	310	1.4e-76	T	31-10-2019	IPR001093	IMP dehydrogenase/GMP reductase	GO:0003824|GO:0055114
Mmel_00009525-RA	9a788fad804299bd621959bcbf3099e9	109	Pfam	PF02058	Guanylin precursor	21	108	1.8e-32	T	31-10-2019	IPR000879	Guanylin	GO:0005576|GO:0030250	Reactome: R-HSA-8935690
Mmel_00011265-RA	5680f59532cb2972f26df70fd1253590	625	Pfam	PF13637	Ankyrin repeats (many copies)	467	519	2.3e-12	T	31-10-2019
Mmel_00011265-RA	5680f59532cb2972f26df70fd1253590	625	Pfam	PF00023	Ankyrin repeat	433	464	0.0051	T	31-10-2019	IPR002110	Ankyrin repeat	GO:0005515
Mmel_00011265-RA	5680f59532cb2972f26df70fd1253590	625	Pfam	PF13857	Ankyrin repeats (many copies)	320	358	2e-08	T	31-10-2019
Mmel_00011265-RA	5680f59532cb2972f26df70fd1253590	625	Pfam	PF12796	Ankyrin repeats (3 copies)	365	428	3.8e-14	T	31-10-2019	IPR020683	Ankyrin repeat-containing domain
Mmel_00011265-RA	5680f59532cb2972f26df70fd1253590	625	Pfam	PF12796	Ankyrin repeats (3 copies)	227	298	7.5e-14	T	31-10-2019	IPR020683	Ankyrin repeat-containing domain
Mmel_00011265-RA	5680f59532cb2972f26df70fd1253590	625	Pfam	PF12796	Ankyrin repeats (3 copies)	6	93	2.7e-20	T	31-10-2019	IPR020683	Ankyrin repeat-containing domain
Mmel_00011265-RA	5680f59532cb2972f26df70fd1253590	625	Pfam	PF12796	Ankyrin repeats (3 copies)	99	163	1.7e-12	T	31-10-2019	IPR020683	Ankyrin repeat-containing domain
Mmel_00015192-RA	9293652b38b86fb2fd848e466ac68785	68	Pfam	PF00620	RhoGAP domain	9	40	1e-07	T	31-10-2019	IPR000198	Rho GTPase-activating protein domain	GO:0007165	Reactome: R-HSA-194840
Mmel_00010998-RA	3929d7f123329808aa25c60cf69ea274	93	Pfam	PF11976	Ubiquitin-2 like Rad60 SUMO-like	16	84	5.4e-26	T	31-10-2019	IPR022617	Rad60/SUMO-like domain
Mmel_00004876-RA	c26f4af0a3376919c504d25e46898c97	1073	Pfam	PF00702	haloacid dehalogenase-like hydrolase	732	779	5.2e-06	T	31-10-2019
Mmel_00004876-RA	c26f4af0a3376919c504d25e46898c97	1073	Pfam	PF13246	Cation transport ATPase (P-type)	477	571	1.2e-24	T	31-10-2019
Mmel_00004876-RA	c26f4af0a3376919c504d25e46898c97	1073	Pfam	PF00689	Cation transporting ATPase, C-terminus	849	1058	1.3e-44	T	31-10-2019	IPR006068	Cation-transporting P-type ATPase, C-terminal		Reactome: R-HSA-936837
Mmel_00004876-RA	c26f4af0a3376919c504d25e46898c97	1073	Pfam	PF00690	Cation transporter/ATPase, N-terminus	94	161	2.6e-17	T	31-10-2019	IPR004014	Cation-transporting P-type ATPase, N-terminal		Reactome: R-HSA-936837
Mmel_00004876-RA	c26f4af0a3376919c504d25e46898c97	1073	Pfam	PF00122	E1-E2 ATPase	214	404	4.2e-44	T	31-10-2019
Mmel_00008473-RA	ccecc3141e0d43feefd190c14da9c986	202	Pfam	PF00777	Glycosyltransferase family 29 (sialyltransferase)	113	190	9.9e-13	T	31-10-2019	IPR001675	Glycosyl transferase family 29	GO:0006486|GO:0008373	Reactome: R-HSA-4085001
Mmel_00008473-RA	ccecc3141e0d43feefd190c14da9c986	202	Pfam	PF00777	Glycosyltransferase family 29 (sialyltransferase)	62	112	2e-06	T	31-10-2019	IPR001675	Glycosyl transferase family 29	GO:0006486|GO:0008373	Reactome: R-HSA-4085001
Mmel_00015027-RA	f2f80ede122ec3347ff19be35e2e2c2e	82	Pfam	PF00069	Protein kinase domain	2	82	1.5e-13	T	31-10-2019	IPR000719	Protein kinase domain	GO:0004672|GO:0005524|GO:0006468
Mmel_00008809-RA	5a609de14b92525c99ec242823cd1e4f	905	Pfam	PF14551	MCM N-terminal domain	184	272	9.7e-17	T	31-10-2019	IPR027925	MCM N-terminal domain		Reactome: R-HSA-176187|Reactome: R-HSA-176974|Reactome: R-HSA-68867|Reactome: R-HSA-68949|Reactome: R-HSA-68962|Reactome: R-HSA-69052|Reactome: R-HSA-69300
Mmel_00008809-RA	5a609de14b92525c99ec242823cd1e4f	905	Pfam	PF00493	MCM2/3/5 family	449	780	9.7e-138	T	31-10-2019	IPR001208	MCM domain	GO:0003677|GO:0005524|GO:0006270
Mmel_00008809-RA	5a609de14b92525c99ec242823cd1e4f	905	Pfam	PF17207	MCM OB domain	281	407	1.1e-36	T	31-10-2019	IPR033762	MCM OB domain		Reactome: R-HSA-176187|Reactome: R-HSA-176974|Reactome: R-HSA-68867|Reactome: R-HSA-68949|Reactome: R-HSA-68962|Reactome: R-HSA-69300
Mmel_00008809-RA	5a609de14b92525c99ec242823cd1e4f	905	Pfam	PF12619	Mini-chromosome maintenance protein 2	50	168	3.4e-15	T	31-10-2019	IPR008045	DNA replication licensing factor Mcm2	GO:0003677|GO:0005524|GO:0005634|GO:0006270|GO:0042555|GO:1905775	Reactome: R-HSA-176187|Reactome: R-HSA-176974|Reactome: R-HSA-68867|Reactome: R-HSA-68949|Reactome: R-HSA-68962|Reactome: R-HSA-69052|Reactome: R-HSA-69300
Mmel_00006291-RA	0f81b605087036b600f034e3eb322d10	246	Pfam	PF00287	Sodium / potassium ATPase beta chain	4	240	5.5e-90	T	31-10-2019	IPR000402	Sodium/potassium-transporting ATPase subunit beta	GO:0005890|GO:0006813|GO:0006814	Reactome: R-HSA-936837
Mmel_00004999-RA	395d543826120748f0f145137f554968	295	Pfam	PF00153	Mitochondrial carrier protein	207	294	5.1e-16	T	31-10-2019	IPR018108	Mitochondrial substrate/solute carrier
Mmel_00004999-RA	395d543826120748f0f145137f554968	295	Pfam	PF00153	Mitochondrial carrier protein	108	200	8e-24	T	31-10-2019	IPR018108	Mitochondrial substrate/solute carrier
Mmel_00004999-RA	395d543826120748f0f145137f554968	295	Pfam	PF00153	Mitochondrial carrier protein	40	97	2.4e-13	T	31-10-2019	IPR018108	Mitochondrial substrate/solute carrier
Mmel_00010344-RA	f21971df19c24f70fd056dabf2646141	205	Pfam	PF10245	Mitochondrial 28S ribosomal protein S22	14	155	8.6e-69	T	31-10-2019	IPR019374	Ribosomal protein S22, mitochondrial		Reactome: R-HSA-5368286|Reactome: R-HSA-5389840|Reactome: R-HSA-5419276
Mmel_00007342-RA	d6548047a092bcb5f38d12770dcbfc4b	385	Pfam	PF00089	Trypsin	215	379	3.1e-50	T	31-10-2019	IPR001254	Serine proteases, trypsin domain	GO:0004252|GO:0006508
Mmel_00007342-RA	d6548047a092bcb5f38d12770dcbfc4b	385	Pfam	PF01390	SEA domain	80	183	1.5e-24	T	31-10-2019	IPR000082	SEA domain
Mmel_00007784-RA	038181c2738bd493ca66ea4321e89a88	68	Pfam	PF01391	Collagen triple helix repeat (20 copies)	1	46	2.8e-07	T	31-10-2019	IPR008160	Collagen triple helix repeat
Mmel_00003620-RA	c933b71e694488d261bede51c862b32d	1086	Pfam	PF01262	Alanine dehydrogenase/PNT, C-terminal domain	226	459	1.5e-70	T	31-10-2019	IPR007698	Alanine dehydrogenase/pyridine nucleotide transhydrogenase, NAD(H)-binding domain
Mmel_00003620-RA	c933b71e694488d261bede51c862b32d	1086	Pfam	PF05222	Alanine dehydrogenase/PNT, N-terminal domain	83	222	7.9e-45	T	31-10-2019	IPR007886	Alanine dehydrogenase/pyridine nucleotide transhydrogenase, N-terminal
Mmel_00003620-RA	c933b71e694488d261bede51c862b32d	1086	Pfam	PF02233	NAD(P) transhydrogenase beta subunit	621	1078	2.8e-184	T	31-10-2019	IPR034300	NADP transhydrogenase beta-like domain		KEGG: 00760+1.6.1.2|Reactome: R-HSA-71403
Mmel_00003620-RA	c933b71e694488d261bede51c862b32d	1086	Pfam	PF12769	4TM region of pyridine nucleotide transhydrogenase, mitoch	524	561	1.9e-13	T	31-10-2019	IPR024605	NAD(P) transhydrogenase, alpha subunit, C-terminal		KEGG: 00760+1.6.1.2|Reactome: R-HSA-71403
Mmel_00015002-RA	16c3bb2dbc359a3d48b1686a076d15c0	149	Pfam	PF00400	WD domain, G-beta repeat	39	71	2.8e-05	T	31-10-2019	IPR001680	WD40 repeat	GO:0005515
Mmel_00004870-RA	f4aac8da9cdd1f16a75464aed07b3158	875	Pfam	PF00271	Helicase conserved C-terminal domain	345	449	1.4e-14	T	31-10-2019	IPR001650	Helicase, C-terminal
Mmel_00004870-RA	f4aac8da9cdd1f16a75464aed07b3158	875	Pfam	PF00176	SNF2 family N-terminal domain	49	317	2.5e-56	T	31-10-2019	IPR000330	SNF2-related, N-terminal domain	GO:0005524
Mmel_00012286-RA	fe952d110d8d0e620a125f16e5cf4d16	63	Pfam	PF14931	Intraflagellar transport complex B, subunit 20	1	59	6.6e-22	T	31-10-2019	IPR028172	Intraflagellar transport protein 20		Reactome: R-HSA-5620924
Mmel_00010967-RA	f74628018f08759ce9e28ae3c0885f27	548	Pfam	PF00651	BTB/POZ domain	16	113	8.8e-21	T	31-10-2019	IPR000210	BTB/POZ domain	GO:0005515
Mmel_00010967-RA	f74628018f08759ce9e28ae3c0885f27	548	Pfam	PF01344	Kelch motif	349	393	4.3e-05	T	31-10-2019	IPR006652	Kelch repeat type 1	GO:0005515
Mmel_00010967-RA	f74628018f08759ce9e28ae3c0885f27	548	Pfam	PF07707	BTB And C-terminal Kelch	120	219	1.1e-19	T	31-10-2019	IPR011705	BTB/Kelch-associated
Mmel_00006619-RA	58677f0092a8b145594d228f031b96cf	532	Pfam	PF16179	Rel homology dimerisation domain	167	262	3.3e-37	T	31-10-2019	IPR032397	Rel homology dimerisation domain
Mmel_00006619-RA	58677f0092a8b145594d228f031b96cf	532	Pfam	PF00554	Rel homology DNA-binding domain	1	158	4.6e-67	T	31-10-2019	IPR011539	Rel homology domain (RHD), DNA-binding domain	GO:0003677|GO:0003700|GO:0006355
Mmel_00008886-RA	d50072b197b83b114bfc17accc19d1d4	887	Pfam	PF00435	Spectrin repeat	510	620	5.5e-19	T	31-10-2019	IPR002017	Spectrin repeat	GO:0005515
Mmel_00008886-RA	d50072b197b83b114bfc17accc19d1d4	887	Pfam	PF00435	Spectrin repeat	275	383	5.6e-14	T	31-10-2019	IPR002017	Spectrin repeat	GO:0005515
Mmel_00008886-RA	d50072b197b83b114bfc17accc19d1d4	887	Pfam	PF00435	Spectrin repeat	394	498	1.2e-22	T	31-10-2019	IPR002017	Spectrin repeat	GO:0005515
Mmel_00008886-RA	d50072b197b83b114bfc17accc19d1d4	887	Pfam	PF00435	Spectrin repeat	631	732	9.1e-14	T	31-10-2019	IPR002017	Spectrin repeat	GO:0005515
Mmel_00008886-RA	d50072b197b83b114bfc17accc19d1d4	887	Pfam	PF08726	Ca2+ insensitive EF hand	817	883	3.5e-27	T	31-10-2019	IPR014837	EF-hand, Ca insensitive		Reactome: R-HSA-373753
Mmel_00008886-RA	d50072b197b83b114bfc17accc19d1d4	887	Pfam	PF00307	Calponin homology (CH) domain	145	250	6.4e-27	T	31-10-2019	IPR001715	Calponin homology domain	GO:0005515
Mmel_00008886-RA	d50072b197b83b114bfc17accc19d1d4	887	Pfam	PF00307	Calponin homology (CH) domain	32	135	1.2e-23	T	31-10-2019	IPR001715	Calponin homology domain	GO:0005515
Mmel_00012570-RA	6462388ed0254f314070754c5eb0d5bb	354	Pfam	PF00226	DnaJ domain	12	52	2.5e-15	T	31-10-2019	IPR001623	DnaJ domain
Mmel_00012570-RA	6462388ed0254f314070754c5eb0d5bb	354	Pfam	PF01556	DnaJ C terminal domain	111	314	1.2e-26	T	31-10-2019	IPR002939	Chaperone DnaJ, C-terminal
Mmel_00012570-RA	6462388ed0254f314070754c5eb0d5bb	354	Pfam	PF00684	DnaJ central domain	137	197	6.7e-11	T	31-10-2019	IPR001305	Heat shock protein DnaJ, cysteine-rich domain	GO:0031072|GO:0051082
Mmel_00012979-RA	550e3f80ba6bee80ffc64fb3f39db903	1344	Pfam	PF08952	Domain of unknown function (DUF1866)	947	1088	1.9e-55	T	31-10-2019	IPR015047	Domain of unknown function DUF1866		KEGG: 00562+3.1.3.36|KEGG: 04070+3.1.3.36|MetaCyc: PWY-6368|Reactome: R-HSA-1660499|Reactome: R-HSA-8856828
Mmel_00012979-RA	550e3f80ba6bee80ffc64fb3f39db903	1344	Pfam	PF02383	SacI homology domain	145	425	5.1e-69	T	31-10-2019	IPR002013	SAC domain	GO:0042578
Mmel_00012979-RA	550e3f80ba6bee80ffc64fb3f39db903	1344	Pfam	PF03372	Endonuclease/Exonuclease/phosphatase family	618	939	4.9e-10	T	31-10-2019	IPR005135	Endonuclease/exonuclease/phosphatase
Mmel_00010607-RA	be64398cc8d2781ea1caead7ab2db097	308	Pfam	PF00173	Cytochrome b5-like Heme/Steroid binding domain	24	95	2.2e-24	T	31-10-2019	IPR001199	Cytochrome b5-like heme/steroid binding domain
Mmel_00010607-RA	be64398cc8d2781ea1caead7ab2db097	308	Pfam	PF00175	Oxidoreductase NAD-binding domain	254	306	5.9e-07	T	31-10-2019	IPR001433	Oxidoreductase FAD/NAD(P)-binding	GO:0016491|GO:0055114
Mmel_00010607-RA	be64398cc8d2781ea1caead7ab2db097	308	Pfam	PF04969	CS domain	136	186	0.00024	T	31-10-2019	IPR007052	CS domain
Mmel_00011910-RA	3339389f4bbbabe7a2880730e8701182	803	Pfam	PF13927	Immunoglobulin domain	109	173	1.1e-09	T	31-10-2019
Mmel_00011910-RA	3339389f4bbbabe7a2880730e8701182	803	Pfam	PF00656	Caspase domain	313	517	2.3e-18	T	31-10-2019
Mmel_00011910-RA	3339389f4bbbabe7a2880730e8701182	803	Pfam	PF13895	Immunoglobulin domain	211	288	6.2e-11	T	31-10-2019	IPR007110	Immunoglobulin-like domain
Mmel_00002709-RA	4286bd9bacc1229f54d87fbc3adc0ef8	130	Pfam	PF00554	Rel homology DNA-binding domain	33	120	1.6e-09	T	31-10-2019	IPR011539	Rel homology domain (RHD), DNA-binding domain	GO:0003677|GO:0003700|GO:0006355
Mmel_00000800-RA	749f01fb8bd32ad772d06c5257957f85	352	Pfam	PF00001	7 transmembrane receptor (rhodopsin family)	52	300	9.9e-54	T	31-10-2019	IPR000276	G protein-coupled receptor, rhodopsin-like	GO:0004930|GO:0007186|GO:0016021
Mmel_00005898-RA	0878541e3d1b272d1ff0dd6ef47c8489	302	Pfam	PF07690	Major Facilitator Superfamily	4	235	3.7e-15	T	31-10-2019	IPR011701	Major facilitator superfamily	GO:0016021|GO:0055085
Mmel_00006910-RA	48701267dc00cc279af4870a17c2ee6e	260	Pfam	PF05334	Protein of unknown function (DUF719)	184	257	1.9e-29	T	31-10-2019	IPR007998	Protein of unknown function DUF719
Mmel_00009566-RA	7a8e45a87208132036e767f07e88fca3	464	Pfam	PF11555	EGFR receptor inhibitor Mig-6	317	371	1e-14	T	31-10-2019	IPR021619	Mig-6 domain
Mmel_00013663-RA	78df9c12b4bbea0935c865490ab0e820	571	Pfam	PF11969	Scavenger mRNA decapping enzyme C-term binding	408	524	1.4e-31	T	31-10-2019
Mmel_00013663-RA	78df9c12b4bbea0935c865490ab0e820	571	Pfam	PF13676	TIR domain	165	273	5.3e-14	T	31-10-2019	IPR000157	Toll/interleukin-1 receptor homology (TIR) domain	GO:0005515|GO:0007165
Mmel_00013663-RA	78df9c12b4bbea0935c865490ab0e820	571	Pfam	PF05652	Scavenger mRNA decapping enzyme (DcpS) N-terminal	311	380	4.4e-12	T	31-10-2019	IPR008594	Scavenger mRNA decapping enzyme DcpS/DCS2	GO:0000290|GO:0016787	Reactome: R-HSA-429958
Mmel_00002212-RA	c1061f69c901f84281411765a13a250a	423	Pfam	PF12260	Protein-kinase domain of FAM69	189	390	3.2e-66	T	31-10-2019	IPR022049	FAM69, protein-kinase domain
Mmel_00002212-RA	c1061f69c901f84281411765a13a250a	423	Pfam	PF14875	N-term cysteine-rich ER, FAM69	14	170	2.4e-59	T	31-10-2019	IPR029244	FAM69, N-terminal
Mmel_00009205-RA	bf5d8b0ebf13a1b17a2be146d0b6ffae	2625	Pfam	PF08742	C8 domain	1816	1881	7.7e-19	T	31-10-2019	IPR014853	Uncharacterised domain, cysteine-rich
Mmel_00009205-RA	bf5d8b0ebf13a1b17a2be146d0b6ffae	2625	Pfam	PF08742	C8 domain	838	905	1.3e-20	T	31-10-2019	IPR014853	Uncharacterised domain, cysteine-rich
Mmel_00009205-RA	bf5d8b0ebf13a1b17a2be146d0b6ffae	2625	Pfam	PF08742	C8 domain	2216	2281	8.6e-20	T	31-10-2019	IPR014853	Uncharacterised domain, cysteine-rich
Mmel_00009205-RA	bf5d8b0ebf13a1b17a2be146d0b6ffae	2625	Pfam	PF08742	C8 domain	457	525	1.4e-22	T	31-10-2019	IPR014853	Uncharacterised domain, cysteine-rich
Mmel_00009205-RA	bf5d8b0ebf13a1b17a2be146d0b6ffae	2625	Pfam	PF08742	C8 domain	1448	1514	2e-20	T	31-10-2019	IPR014853	Uncharacterised domain, cysteine-rich
Mmel_00009205-RA	bf5d8b0ebf13a1b17a2be146d0b6ffae	2625	Pfam	PF00094	von Willebrand factor type D domain	260	413	1.5e-33	T	31-10-2019	IPR001846	von Willebrand factor, type D domain
Mmel_00009205-RA	bf5d8b0ebf13a1b17a2be146d0b6ffae	2625	Pfam	PF00094	von Willebrand factor type D domain	1618	1772	9.7e-35	T	31-10-2019	IPR001846	von Willebrand factor, type D domain
Mmel_00009205-RA	bf5d8b0ebf13a1b17a2be146d0b6ffae	2625	Pfam	PF00094	von Willebrand factor type D domain	644	794	9.4e-39	T	31-10-2019	IPR001846	von Willebrand factor, type D domain
Mmel_00009205-RA	bf5d8b0ebf13a1b17a2be146d0b6ffae	2625	Pfam	PF00094	von Willebrand factor type D domain	1250	1403	1.6e-37	T	31-10-2019	IPR001846	von Willebrand factor, type D domain
Mmel_00009205-RA	bf5d8b0ebf13a1b17a2be146d0b6ffae	2625	Pfam	PF00094	von Willebrand factor type D domain	2003	2157	1.6e-27	T	31-10-2019	IPR001846	von Willebrand factor, type D domain
Mmel_00009205-RA	bf5d8b0ebf13a1b17a2be146d0b6ffae	2625	Pfam	PF01826	Trypsin Inhibitor like cysteine rich domain	1518	1567	3.9e-10	T	31-10-2019	IPR002919	Trypsin Inhibitor-like, cysteine rich domain
Mmel_00009205-RA	bf5d8b0ebf13a1b17a2be146d0b6ffae	2625	Pfam	PF01826	Trypsin Inhibitor like cysteine rich domain	1885	1940	4e-10	T	31-10-2019	IPR002919	Trypsin Inhibitor-like, cysteine rich domain
Mmel_00009205-RA	bf5d8b0ebf13a1b17a2be146d0b6ffae	2625	Pfam	PF01826	Trypsin Inhibitor like cysteine rich domain	529	582	6.6e-12	T	31-10-2019	IPR002919	Trypsin Inhibitor-like, cysteine rich domain
Mmel_00009205-RA	bf5d8b0ebf13a1b17a2be146d0b6ffae	2625	Pfam	PF01826	Trypsin Inhibitor like cysteine rich domain	2285	2338	2.8e-13	T	31-10-2019	IPR002919	Trypsin Inhibitor-like, cysteine rich domain
Mmel_00009205-RA	bf5d8b0ebf13a1b17a2be146d0b6ffae	2625	Pfam	PF12714	TILa domain	1567	1611	5.3e-07	T	31-10-2019	IPR025615	TILa domain
Mmel_00009205-RA	bf5d8b0ebf13a1b17a2be146d0b6ffae	2625	Pfam	PF12714	TILa domain	2445	2492	9.7e-07	T	31-10-2019	IPR025615	TILa domain
Mmel_00009205-RA	bf5d8b0ebf13a1b17a2be146d0b6ffae	2625	Pfam	PF12714	TILa domain	1941	1995	7.5e-13	T	31-10-2019	IPR025615	TILa domain
Mmel_00009205-RA	bf5d8b0ebf13a1b17a2be146d0b6ffae	2625	Pfam	PF12714	TILa domain	583	636	1.6e-08	T	31-10-2019	IPR025615	TILa domain
Mmel_00009205-RA	bf5d8b0ebf13a1b17a2be146d0b6ffae	2625	Pfam	PF00629	MAM domain, meprin/A5/mu	75	234	3.3e-30	T	31-10-2019	IPR000998	MAM domain	GO:0016020
Mmel_00009205-RA	bf5d8b0ebf13a1b17a2be146d0b6ffae	2625	Pfam	PF00629	MAM domain, meprin/A5/mu	915	1069	1.6e-43	T	31-10-2019	IPR000998	MAM domain	GO:0016020
Mmel_00009205-RA	bf5d8b0ebf13a1b17a2be146d0b6ffae	2625	Pfam	PF00629	MAM domain, meprin/A5/mu	1070	1184	8.6e-21	T	31-10-2019	IPR000998	MAM domain	GO:0016020
Mmel_00009261-RA	4a0cf368aee9864f9bbbf51ca7320876	676	Pfam	PF00350	Dynamin family	115	290	8.7e-47	T	31-10-2019	IPR022812	Dynamin superfamily
Mmel_00009261-RA	4a0cf368aee9864f9bbbf51ca7320876	676	Pfam	PF02212	Dynamin GTPase effector domain	588	672	1.2e-20	T	31-10-2019	IPR003130	Dynamin GTPase effector	GO:0003924|GO:0005525
Mmel_00009261-RA	4a0cf368aee9864f9bbbf51ca7320876	676	Pfam	PF01031	Dynamin central region	448	562	1.8e-24	T	31-10-2019	IPR000375	Dynamin central domain	GO:0005525
Mmel_00009261-RA	4a0cf368aee9864f9bbbf51ca7320876	676	Pfam	PF01031	Dynamin central region	303	420	5.6e-41	T	31-10-2019	IPR000375	Dynamin central domain	GO:0005525
Mmel_00007182-RA	da78dd25b201077c312421e98b2a2198	668	Pfam	PF07714	Protein tyrosine kinase	336	572	5.3e-92	T	31-10-2019	IPR001245	Serine-threonine/tyrosine-protein kinase, catalytic domain	GO:0004672|GO:0006468
Mmel_00007182-RA	da78dd25b201077c312421e98b2a2198	668	Pfam	PF07679	Immunoglobulin I-set domain	81	175	2.3e-11	T	31-10-2019	IPR013098	Immunoglobulin I-set
Mmel_00004603-RA	ad7cff29813a2609bec806844a8644ab	600	Pfam	PF00149	Calcineurin-like phosphoesterase	32	150	7.9e-08	T	31-10-2019	IPR004843	Calcineurin-like phosphoesterase domain, ApaH type	GO:0016787
Mmel_00010981-RA	49a79caed0e6f681d16b00d1b8401e62	390	Pfam	PF13855	Leucine rich repeat	146	206	7.1e-16	T	31-10-2019	IPR001611	Leucine-rich repeat	GO:0005515
Mmel_00010981-RA	49a79caed0e6f681d16b00d1b8401e62	390	Pfam	PF13855	Leucine rich repeat	59	112	5.8e-07	T	31-10-2019	IPR001611	Leucine-rich repeat	GO:0005515
Mmel_00006653-RA	ef29a92d5cbc1e0924f08b63898b6c9b	373	Pfam	PF00084	Sushi repeat (SCR repeat)	93	146	7.6e-09	T	31-10-2019	IPR000436	Sushi/SCR/CCP domain
Mmel_00006653-RA	ef29a92d5cbc1e0924f08b63898b6c9b	373	Pfam	PF00008	EGF-like domain	152	180	2.9e-07	T	31-10-2019	IPR000742	EGF-like domain
Mmel_00006653-RA	ef29a92d5cbc1e0924f08b63898b6c9b	373	Pfam	PF12662	Complement Clr-like EGF-like	205	224	7.4e-08	T	31-10-2019	IPR026823	Complement Clr-like EGF domain
Mmel_00010340-RA	eee922ee428607d8a447c39c06afa92d	525	Pfam	PF00069	Protein kinase domain	202	466	1.4e-73	T	31-10-2019	IPR000719	Protein kinase domain	GO:0004672|GO:0005524|GO:0006468
Mmel_00010340-RA	eee922ee428607d8a447c39c06afa92d	525	Pfam	PF00498	FHA domain	93	171	9.2e-12	T	31-10-2019	IPR000253	Forkhead-associated (FHA) domain	GO:0005515
Mmel_00006845-RA	b5a7e7d29979bc02f70039246c052350	93	Pfam	PF16100	RecQ-mediated genome instability protein 2	43	89	4.2e-21	T	31-10-2019	IPR032245	RecQ-mediated genome instability protein 2		Reactome: R-HSA-5685938|Reactome: R-HSA-5685942|Reactome: R-HSA-5693554|Reactome: R-HSA-5693568|Reactome: R-HSA-5693579|Reactome: R-HSA-5693607|Reactome: R-HSA-5693616|Reactome: R-HSA-6804756|Reactome: R-HSA-69473
Mmel_00014839-RA	9eda5337a67d9a79d08fb3bc7121c3e9	161	Pfam	PF14775	Sperm tail C-terminal domain	94	153	1.4e-22	T	31-10-2019	IPR029440	Dynein regulatory complex protein 1, C-terminal
Mmel_00012412-RA	011c1de6fd9450b4d7224ae231fe110f	143	Pfam	PF03874	RNA polymerase Rpb4	7	120	2.5e-31	T	31-10-2019	IPR005574	RNA polymerase subunit RPB4/RPC9	GO:0006352|GO:0055029
Mmel_00006129-RA	c707d6f086387598bbc5aa760edb4fe8	792	Pfam	PF00004	ATPase family associated with various cellular activities (AAA)	311	448	1.4e-21	T	31-10-2019	IPR003959	ATPase, AAA-type, core	GO:0005524
Mmel_00006129-RA	c707d6f086387598bbc5aa760edb4fe8	792	Pfam	PF05362	Lon protease (S16) C-terminal proteolytic domain	569	775	1.1e-78	T	31-10-2019	IPR008269	Peptidase S16, Lon proteolytic domain	GO:0004176|GO:0004252|GO:0006508
Mmel_00006129-RA	c707d6f086387598bbc5aa760edb4fe8	792	Pfam	PF02190	ATP-dependent protease La (LON) substrate-binding domain	1	141	9.3e-14	T	31-10-2019	IPR003111	Lon, substrate-binding domain
Mmel_00014743-RA	a871386fcf1be3a91568a43e657add3e	343	Pfam	PF07679	Immunoglobulin I-set domain	104	185	8.7e-14	T	31-10-2019	IPR013098	Immunoglobulin I-set
Mmel_00014743-RA	a871386fcf1be3a91568a43e657add3e	343	Pfam	PF07679	Immunoglobulin I-set domain	7	88	3.9e-14	T	31-10-2019	IPR013098	Immunoglobulin I-set
Mmel_00014743-RA	a871386fcf1be3a91568a43e657add3e	343	Pfam	PF13927	Immunoglobulin domain	206	271	9.6e-11	T	31-10-2019
Mmel_00013227-RA	d44d98d5faf5f579401e24e14f8ee6ef	205	Pfam	PF00092	von Willebrand factor type A domain	93	157	3.2e-14	T	31-10-2019	IPR002035	von Willebrand factor, type A
Mmel_00008113-RA	7dcd8c4c49c43cd69c31cd0c6f05a516	166	Pfam	PF00241	Cofilin/tropomyosin-type actin-binding protein	28	152	4.2e-30	T	31-10-2019	IPR002108	Actin-depolymerising factor homology domain	GO:0003779|GO:0005622
Mmel_00013427-RA	a7571ba9b4ef405d486c8e082989f025	145	Pfam	PF00595	PDZ domain (Also known as DHR or GLGF)	25	74	1.4e-09	T	31-10-2019	IPR001478	PDZ domain	GO:0005515
Mmel_00011758-RA	4c4a6979089ca2abc1d56c9c9f6d2a40	541	Pfam	PF00053	Laminin EGF domain	411	455	0.00084	T	31-10-2019	IPR002049	Laminin EGF domain
Mmel_00011758-RA	4c4a6979089ca2abc1d56c9c9f6d2a40	541	Pfam	PF00053	Laminin EGF domain	366	404	0.0048	T	31-10-2019	IPR002049	Laminin EGF domain
Mmel_00011758-RA	4c4a6979089ca2abc1d56c9c9f6d2a40	541	Pfam	PF00053	Laminin EGF domain	498	526	0.013	T	31-10-2019	IPR002049	Laminin EGF domain
Mmel_00011758-RA	4c4a6979089ca2abc1d56c9c9f6d2a40	541	Pfam	PF14670	Coagulation Factor Xa inhibitory site	146	181	5.2e-10	T	31-10-2019
Mmel_00011758-RA	4c4a6979089ca2abc1d56c9c9f6d2a40	541	Pfam	PF14670	Coagulation Factor Xa inhibitory site	228	263	1.4e-10	T	31-10-2019
Mmel_00011758-RA	4c4a6979089ca2abc1d56c9c9f6d2a40	541	Pfam	PF14670	Coagulation Factor Xa inhibitory site	103	135	3.3e-10	T	31-10-2019
Mmel_00011758-RA	4c4a6979089ca2abc1d56c9c9f6d2a40	541	Pfam	PF14670	Coagulation Factor Xa inhibitory site	52	87	5.4e-10	T	31-10-2019
Mmel_00011758-RA	4c4a6979089ca2abc1d56c9c9f6d2a40	541	Pfam	PF07645	Calcium-binding EGF domain	183	220	2e-05	T	31-10-2019	IPR001881	EGF-like calcium-binding domain	GO:0005509
Mmel_00001690-RA	7eaebbb92b37a6abc6816a36dd928e2f	352	Pfam	PF01153	Glypican	264	348	9.1e-13	T	31-10-2019	IPR001863	Glypican	GO:0009966|GO:0046658	Reactome: R-HSA-1971475|Reactome: R-HSA-2022928|Reactome: R-HSA-2024096|Reactome: R-HSA-3560783|Reactome: R-HSA-3560801|Reactome: R-HSA-3656237|Reactome: R-HSA-3656253|Reactome: R-HSA-4420332|Reactome: R-HSA-975634
Mmel_00001690-RA	7eaebbb92b37a6abc6816a36dd928e2f	352	Pfam	PF01153	Glypican	2	229	5.9e-81	T	31-10-2019	IPR001863	Glypican	GO:0009966|GO:0046658	Reactome: R-HSA-1971475|Reactome: R-HSA-2022928|Reactome: R-HSA-2024096|Reactome: R-HSA-3560783|Reactome: R-HSA-3560801|Reactome: R-HSA-3656237|Reactome: R-HSA-3656253|Reactome: R-HSA-4420332|Reactome: R-HSA-975634
Mmel_00011459-RA	c3763cc5da605f628a3ddbbb2c2372f4	135	Pfam	PF15260	Protein family FAM219A	4	135	9.6e-55	T	31-10-2019	IPR029339	Protein FAM219
Mmel_00012764-RA	39d44af3df07e43cbebfde813bc15a4a	134	Pfam	PF07923	N1221-like protein	7	134	3.7e-26	T	31-10-2019	IPR012486	Far11/STRP, N-terminal
Mmel_00007981-RA	50f03e96947a68d8256c3f1c15b81cca	521	Pfam	PF00651	BTB/POZ domain	113	218	2.9e-23	T	31-10-2019	IPR000210	BTB/POZ domain	GO:0005515
Mmel_00007981-RA	50f03e96947a68d8256c3f1c15b81cca	521	Pfam	PF07707	BTB And C-terminal Kelch	233	302	1.1e-07	T	31-10-2019	IPR011705	BTB/Kelch-associated
Mmel_00007981-RA	50f03e96947a68d8256c3f1c15b81cca	521	Pfam	PF08005	PHR domain	375	520	6.2e-46	T	31-10-2019	IPR012983	PHR
Mmel_00008223-RA	0cd244587bfd0f1fdc4e6713b86f5244	2260	Pfam	PF15963	Myb DNA-binding like	300	384	1e-27	T	31-10-2019
Mmel_00004856-RA	e38939609a8aa2ab948c58e50cc8d3fb	265	Pfam	PF00612	IQ calmodulin-binding motif	25	45	2.8e-06	T	31-10-2019	IPR000048	IQ motif, EF-hand binding site	GO:0005515
Mmel_00004856-RA	e38939609a8aa2ab948c58e50cc8d3fb	265	Pfam	PF06614	Neuromodulin	61	212	2.5e-51	T	31-10-2019	IPR017454	Neuromodulin (GAP-43), C-terminal	GO:0040008	Reactome: R-HSA-373760
Mmel_00004856-RA	e38939609a8aa2ab948c58e50cc8d3fb	265	Pfam	PF10580	Gap junction protein N-terminal region	2	24	2.4e-13	T	31-10-2019	IPR018947	Neuromodulin gap junction N-terminal		Reactome: R-HSA-373760
Mmel_00011555-RA	e2f754cb28130a6eb9e5c6f9b2e5c04c	1112	Pfam	PF00781	Diacylglycerol kinase catalytic domain	215	329	4.8e-27	T	31-10-2019	IPR001206	Diacylglycerol kinase, catalytic domain	GO:0016301
Mmel_00011555-RA	e2f754cb28130a6eb9e5c6f9b2e5c04c	1112	Pfam	PF00609	Diacylglycerol kinase accessory domain	661	817	4.1e-51	T	31-10-2019	IPR000756	Diacylglycerol kinase, accessory domain	GO:0004143|GO:0007205	KEGG: 00561+2.7.1.107|KEGG: 00564+2.7.1.107|KEGG: 04070+2.7.1.107|MetaCyc: PWY-7039|MetaCyc: PWY-7817|Reactome: R-HSA-114508
Mmel_00011555-RA	e2f754cb28130a6eb9e5c6f9b2e5c04c	1112	Pfam	PF00130	Phorbol esters/diacylglycerol binding domain (C1 domain)	58	108	2.2e-08	T	31-10-2019	IPR002219	Protein kinase C-like, phorbol ester/diacylglycerol-binding domain	GO:0035556
Mmel_00011555-RA	e2f754cb28130a6eb9e5c6f9b2e5c04c	1112	Pfam	PF00130	Phorbol esters/diacylglycerol binding domain (C1 domain)	130	182	7.6e-11	T	31-10-2019	IPR002219	Protein kinase C-like, phorbol ester/diacylglycerol-binding domain	GO:0035556
Mmel_00011555-RA	e2f754cb28130a6eb9e5c6f9b2e5c04c	1112	Pfam	PF07647	SAM domain (Sterile alpha motif)	1040	1103	1.3e-18	T	31-10-2019	IPR001660	Sterile alpha motif domain	GO:0005515
Mmel_00009100-RA	1d11bce1a5352314a16135cb08c6cf40	1173	Pfam	PF12257	Vacuolar membrane-associated protein Iml1	2	50	7e-18	T	31-10-2019	IPR027244	Vacuolar membrane-associated protein Iml1
Mmel_00009100-RA	1d11bce1a5352314a16135cb08c6cf40	1173	Pfam	PF00610	Domain found in Dishevelled, Egl-10, and Pleckstrin (DEP)	781	840	1.9e-09	T	31-10-2019	IPR000591	DEP domain	GO:0035556
Mmel_00009097-RA	1ea2fbc329d56c8266cd64c0d8afa170	574	Pfam	PF00405	Transferrin	199	546	3.9e-64	T	31-10-2019	IPR001156	Transferrin-like domain
Mmel_00009097-RA	1ea2fbc329d56c8266cd64c0d8afa170	574	Pfam	PF00405	Transferrin	1	187	2.7e-39	T	31-10-2019	IPR001156	Transferrin-like domain
Mmel_00000725-RA	6259a35ec0df9ed334866bdca06f7b3f	86	Pfam	PF00179	Ubiquitin-conjugating enzyme	3	49	1.5e-13	T	31-10-2019	IPR000608	Ubiquitin-conjugating enzyme E2		Reactome: R-HSA-983168
Mmel_00009240-RA	b05ae5a27503ee508deb7ebc6768ffeb	471	Pfam	PF00233	3'5'-cyclic nucleotide phosphodiesterase	345	381	3.2e-06	T	31-10-2019	IPR002073	3'5'-cyclic nucleotide phosphodiesterase, catalytic domain	GO:0004114|GO:0007165
Mmel_00009240-RA	b05ae5a27503ee508deb7ebc6768ffeb	471	Pfam	PF00233	3'5'-cyclic nucleotide phosphodiesterase	201	336	6.8e-54	T	31-10-2019	IPR002073	3'5'-cyclic nucleotide phosphodiesterase, catalytic domain	GO:0004114|GO:0007165
Mmel_00003848-RA	357b36712258a5f9a711fd44ed04b2f5	1111	Pfam	PF00063	Myosin head (motor domain)	23	681	2e-251	T	31-10-2019	IPR001609	Myosin head, motor domain	GO:0003774|GO:0005524|GO:0016459
Mmel_00003848-RA	357b36712258a5f9a711fd44ed04b2f5	1111	Pfam	PF00018	SH3 domain	1060	1104	1.6e-16	T	31-10-2019	IPR001452	SH3 domain	GO:0005515
Mmel_00003848-RA	357b36712258a5f9a711fd44ed04b2f5	1111	Pfam	PF06017	Unconventional myosin tail, actin- and lipid-binding	721	922	3.4e-55	T	31-10-2019	IPR010926	Class I myosin tail homology domain	GO:0003774|GO:0016459
Mmel_00006581-RA	1e66989323b49a81320b35cd28bd9c65	634	Pfam	PF00629	MAM domain, meprin/A5/mu	118	275	6.6e-33	T	31-10-2019	IPR000998	MAM domain	GO:0016020
Mmel_00006581-RA	1e66989323b49a81320b35cd28bd9c65	634	Pfam	PF00629	MAM domain, meprin/A5/mu	1	115	8.2e-17	T	31-10-2019	IPR000998	MAM domain	GO:0016020
Mmel_00006581-RA	1e66989323b49a81320b35cd28bd9c65	634	Pfam	PF00629	MAM domain, meprin/A5/mu	290	446	5.1e-30	T	31-10-2019	IPR000998	MAM domain	GO:0016020
Mmel_00006581-RA	1e66989323b49a81320b35cd28bd9c65	634	Pfam	PF00629	MAM domain, meprin/A5/mu	458	613	2.7e-43	T	31-10-2019	IPR000998	MAM domain	GO:0016020
Mmel_00002431-RA	83b21ea45b9833c9706b9d8abae87e97	553	Pfam	PF08567	TFIIH p62 subunit, N-terminal domain	22	102	4.3e-25	T	31-10-2019	IPR013876	TFIIH p62 subunit, N-terminal		Reactome: R-HSA-112382|Reactome: R-HSA-113418|Reactome: R-HSA-167152|Reactome: R-HSA-167158|Reactome: R-HSA-167160|Reactome: R-HSA-167161|Reactome: R-HSA-167162|Reactome: R-HSA-167172|Reactome: R-HSA-167200|Reactome: R-HSA-167246|Reactome: R-HSA-427413|Reactome: R-HSA-5696395|Reactome: R-HSA-5696400|Reactome: R-HSA-674695|Reactome: R-HSA-6781823|Reactome: R-HSA-6781827|Reactome: R-HSA-6782135|Rea…
Mmel_00002431-RA	83b21ea45b9833c9706b9d8abae87e97	553	Pfam	PF03909	BSD domain	185	238	1.3e-16	T	31-10-2019	IPR005607	BSD domain
Mmel_00012878-RA	9aa3d05a046c500c06e3778b61b2a732	506	Pfam	PF01938	TRAM domain	422	493	3.2e-12	T	31-10-2019	IPR002792	TRAM domain
Mmel_00012878-RA	9aa3d05a046c500c06e3778b61b2a732	506	Pfam	PF00919	Uncharacterized protein family UPF0004	6	108	2e-30	T	31-10-2019	IPR013848	Methylthiotransferase, N-terminal	GO:0051539
Mmel_00012878-RA	9aa3d05a046c500c06e3778b61b2a732	506	Pfam	PF04055	Radical SAM superfamily	156	366	2.1e-29	T	31-10-2019	IPR007197	Radical SAM	GO:0003824|GO:0051536
Mmel_00014908-RA	5cb6cb58ff38cb9856a31d3157da2b26	156	Pfam	PF03134	TB2/DP1, HVA22 family	18	95	2.4e-28	T	31-10-2019	IPR004345	TB2/DP1/HVA22-related protein		Reactome: R-HSA-381753
Mmel_00006406-RA	4de32c430bd6af4ae73512e57de78e2b	316	Pfam	PF10291	Muniscin C-terminal mu homology domain	211	316	1.4e-22	T	31-10-2019	IPR018808	Muniscin C-terminal		Reactome: R-HSA-8856825|Reactome: R-HSA-8856828
Mmel_00008141-RA	6a3597edbc75b57204ab46ea9d809ee7	587	Pfam	PF05192	MutS domain III	3	253	3e-16	T	31-10-2019	IPR007696	DNA mismatch repair protein MutS, core	GO:0005524|GO:0006298|GO:0030983
Mmel_00008141-RA	6a3597edbc75b57204ab46ea9d809ee7	587	Pfam	PF00488	MutS domain V	309	506	3.9e-80	T	31-10-2019	IPR000432	DNA mismatch repair protein MutS, C-terminal	GO:0005524|GO:0006298|GO:0030983
Mmel_00008141-RA	6a3597edbc75b57204ab46ea9d809ee7	587	Pfam	PF05190	MutS family domain IV	118	212	1.7e-20	T	31-10-2019	IPR007861	DNA mismatch repair protein MutS, clamp	GO:0005524|GO:0006298|GO:0030983
Mmel_00012612-RA	6afcea89a7a84b06a6fc61448d67bce8	253	Pfam	PF06534	Repulsive guidance molecule (RGM) C-terminus	32	206	2.5e-68	T	31-10-2019	IPR009496	Repulsive guidance molecule, C-terminal		Reactome: R-HSA-373752
Mmel_00003069-RA	d7233d601e5c5d7d9a13e0ff5d2ac43a	775	Pfam	PF14661	HAUS augmin-like complex subunit 6 N-terminus	3	137	2.4e-21	T	31-10-2019	IPR028163	HAUS augmin-like complex subunit 6, N-terminal		Reactome: R-HSA-2565942|Reactome: R-HSA-380259|Reactome: R-HSA-380270|Reactome: R-HSA-380284|Reactome: R-HSA-380320|Reactome: R-HSA-5620912|Reactome: R-HSA-8854518
Mmel_00001151-RA	468afe75ed6ca894603abd739fa1f04e	1171	Pfam	PF00431	CUB domain	6	111	3.5e-24	T	31-10-2019	IPR000859	CUB domain
Mmel_00001151-RA	468afe75ed6ca894603abd739fa1f04e	1171	Pfam	PF00354	Pentaxin family	124	303	2.7e-11	T	31-10-2019	IPR001759	Pentraxin-related
Mmel_00001151-RA	468afe75ed6ca894603abd739fa1f04e	1171	Pfam	PF01825	GPCR proteolysis site, GPS, motif	717	762	1e-14	T	31-10-2019	IPR000203	GPS motif
Mmel_00001151-RA	468afe75ed6ca894603abd739fa1f04e	1171	Pfam	PF00002	7 transmembrane receptor (Secretin family)	778	1032	2.3e-46	T	31-10-2019	IPR000832	GPCR, family 2, secretin-like	GO:0004930|GO:0007186|GO:0016021
Mmel_00012846-RA	63195980cbd00dfa76bf600a92236b27	131	Pfam	PF05916	GINS complex protein	12	65	6.6e-06	T	31-10-2019	IPR021151	GINS subunit, domain A		Reactome: R-HSA-176974
Mmel_00013366-RA	252362e2dcb43208f8655e7df306dd55	181	Pfam	PF11914	Domain of unknown function (DUF3432)	89	179	7.1e-35	T	31-10-2019	IPR021839	Early growth response protein 1, C-terminal		Reactome: R-HSA-8943724|Reactome: R-HSA-909733
Mmel_00013366-RA	252362e2dcb43208f8655e7df306dd55	181	Pfam	PF00096	Zinc finger, C2H2 type	29	51	0.00019	T	31-10-2019
Mmel_00013366-RA	252362e2dcb43208f8655e7df306dd55	181	Pfam	PF00096	Zinc finger, C2H2 type	6	23	0.0002	T	31-10-2019
Mmel_00013366-RA	252362e2dcb43208f8655e7df306dd55	181	Pfam	PF00096	Zinc finger, C2H2 type	57	79	0.00053	T	31-10-2019
Mmel_00007617-RA	d1e153191a91cf621720962d6cc36983	354	Pfam	PF07647	SAM domain (Sterile alpha motif)	44	90	1.9e-09	T	31-10-2019	IPR001660	Sterile alpha motif domain	GO:0005515
Mmel_00004813-RA	c557141985de200fca7537c0bedd3bc3	157	Pfam	PF12796	Ankyrin repeats (3 copies)	3	89	5.9e-16	T	31-10-2019	IPR020683	Ankyrin repeat-containing domain
Mmel_00003318-RA	2dd4d6aa302866b5409acde4762311b1	646	Pfam	PF00753	Metallo-beta-lactamase superfamily	2	153	4.2e-15	T	31-10-2019	IPR001279	Metallo-beta-lactamase
Mmel_00003318-RA	2dd4d6aa302866b5409acde4762311b1	646	Pfam	PF11718	Pre-mRNA 3'-end-processing endonuclease polyadenylation factor C-term	441	644	8.5e-54	T	31-10-2019	IPR021718	Pre-mRNA 3'-end-processing endonuclease polyadenylation factor C-term		Reactome: R-HSA-109688|Reactome: R-HSA-159231|Reactome: R-HSA-72163|Reactome: R-HSA-72187|Reactome: R-HSA-77595
Mmel_00003318-RA	2dd4d6aa302866b5409acde4762311b1	646	Pfam	PF10996	Beta-Casp domain	208	329	2.5e-34	T	31-10-2019	IPR022712	Beta-Casp domain
Mmel_00003318-RA	2dd4d6aa302866b5409acde4762311b1	646	Pfam	PF07521	Zn-dependent metallo-hydrolase RNA specificity domain	344	410	1.8e-21	T	31-10-2019	IPR011108	Zn-dependent metallo-hydrolase, RNA specificity domain
Mmel_00000353-RA	68c3b41c4c1fcbdbcd9dea06c4b03ff6	595	Pfam	PF08788	NHR2 domain like	328	394	1.4e-39	T	31-10-2019	IPR014896	NHR2-like
Mmel_00000353-RA	68c3b41c4c1fcbdbcd9dea06c4b03ff6	595	Pfam	PF07531	NHR1 homology to TAF	114	202	4e-34	T	31-10-2019	IPR003894	TAFH/NHR1	GO:0003700|GO:0006355
Mmel_00000353-RA	68c3b41c4c1fcbdbcd9dea06c4b03ff6	595	Pfam	PF01753	MYND finger	506	542	2.7e-07	T	31-10-2019	IPR002893	Zinc finger, MYND-type
Mmel_00008353-RA	6721290f2ab4ccf45248077be24ad4a6	211	Pfam	PF13639	Ring finger domain	158	200	4.7e-15	T	31-10-2019	IPR001841	Zinc finger, RING-type
Mmel_00006597-RA	c4d8715bcd028d2eefb3622d262f7bbf	879	Pfam	PF00387	Phosphatidylinositol-specific phospholipase C, Y domain	274	388	2.3e-40	T	31-10-2019	IPR001711	Phospholipase C, phosphatidylinositol-specific, Y domain	GO:0004435|GO:0006629|GO:0007165|GO:0035556	KEGG: 00562+3.1.4.11|KEGG: 04070+3.1.4.11|MetaCyc: PWY-6351|MetaCyc: PWY-6367|MetaCyc: PWY-7039|Reactome: R-HSA-1855204
Mmel_00006597-RA	c4d8715bcd028d2eefb3622d262f7bbf	879	Pfam	PF06631	Protein of unknown function (DUF1154)	639	676	3e-07	T	31-10-2019	IPR009535	Phospholipase C-beta, conserved site		KEGG: 00562+3.1.4.11|KEGG: 04070+3.1.4.11|MetaCyc: PWY-6351|MetaCyc: PWY-6367|MetaCyc: PWY-7039|Reactome: R-HSA-112043|Reactome: R-HSA-1855204|Reactome: R-HSA-416476
Mmel_00006597-RA	c4d8715bcd028d2eefb3622d262f7bbf	879	Pfam	PF00388	Phosphatidylinositol-specific phospholipase C, X domain	57	207	2.5e-58	T	31-10-2019	IPR000909	Phosphatidylinositol-specific phospholipase C, X domain
Mmel_00006597-RA	c4d8715bcd028d2eefb3622d262f7bbf	879	Pfam	PF00168	C2 domain	411	504	1e-06	T	31-10-2019	IPR000008	C2 domain
Mmel_00006597-RA	c4d8715bcd028d2eefb3622d262f7bbf	879	Pfam	PF08703	PLC-beta C terminal	737	877	2.4e-47	T	31-10-2019	IPR014815	Phospholipase C-beta, C-terminal domain	GO:0004435|GO:0005509|GO:0016042	KEGG: 00562+3.1.4.11|KEGG: 04070+3.1.4.11|MetaCyc: PWY-6351|MetaCyc: PWY-6367|MetaCyc: PWY-7039|Reactome: R-HSA-112043|Reactome: R-HSA-1855204|Reactome: R-HSA-399997|Reactome: R-HSA-4086398|Reactome: R-HSA-416476|Reactome: R-HSA-418217|Reactome: R-HSA-434316|Reactome: R-HSA-500657
Mmel_00003295-RA	506a9f1a244a89d7551d9c9486688c87	661	Pfam	PF03098	Animal haem peroxidase	583	651	9.6e-16	T	31-10-2019	IPR019791	Haem peroxidase, animal type
Mmel_00009384-RA	c66c0c59366c21ba0fc2b2a042668216	460	Pfam	PF01593	Flavin containing amine oxidoreductase	34	437	6.3e-53	T	31-10-2019	IPR002937	Amine oxidase	GO:0016491|GO:0055114
Mmel_00012097-RA	0bfb66210db85d8983d8c0371aded615	1001	Pfam	PF14796	Clathrin-adaptor complex-3 beta-1 subunit C-terminal	832	882	2.1e-08	T	31-10-2019	IPR029390	AP-3 complex subunit beta, C-terminal domain
Mmel_00012097-RA	0bfb66210db85d8983d8c0371aded615	1001	Pfam	PF01602	Adaptin N terminal region	36	563	4.6e-173	T	31-10-2019	IPR002553	Clathrin/coatomer adaptor, adaptin-like, N-terminal	GO:0006886|GO:0016192|GO:0030117
Mmel_00007260-RA	faf65f43e3efe4a3b7cb652af316307e	451	Pfam	PF03953	Tubulin C-terminal domain	261	381	3.1e-40	T	31-10-2019	IPR018316	Tubulin/FtsZ, 2-layer sandwich domain		Reactome: R-HSA-1445148|Reactome: R-HSA-190840|Reactome: R-HSA-190861|Reactome: R-HSA-2132295|Reactome: R-HSA-2467813|Reactome: R-HSA-2500257|Reactome: R-HSA-3371497|Reactome: R-HSA-380320|Reactome: R-HSA-437239|Reactome: R-HSA-5617833|Reactome: R-HSA-5626467|Reactome: R-HSA-5663220|Reactome: R-HSA-6807878|Reactome: R-HSA-6811434|Reactome: R-HSA-6811436|Reactome: R-HSA-68877|Reactome: R-HSA-88522…
Mmel_00007260-RA	faf65f43e3efe4a3b7cb652af316307e	451	Pfam	PF00091	Tubulin/FtsZ family, GTPase domain	3	211	1.3e-70	T	31-10-2019	IPR003008	Tubulin/FtsZ, GTPase domain	GO:0003924	Reactome: R-HSA-380320
Mmel_00011681-RA	32762d9ed86d7188b628ec0554dd2ba8	311	Pfam	PF01126	Heme oxygenase	29	234	4.7e-83	T	31-10-2019	IPR016053	Haem oxygenase-like	GO:0004392|GO:0006788|GO:0055114	KEGG: 00860+1.14.14.18|MetaCyc: PWY-5874|Reactome: R-HSA-189483|Reactome: R-HSA-917937
Mmel_00001791-RA	897dc5d2403e839b2d6f440d4ff4b2d2	221	Pfam	PF09011	HMG-box domain	12	84	9.7e-27	T	31-10-2019	IPR009071	High mobility group box domain
Mmel_00001791-RA	897dc5d2403e839b2d6f440d4ff4b2d2	221	Pfam	PF00505	HMG (high mobility group) box	101	169	1.9e-27	T	31-10-2019	IPR009071	High mobility group box domain
Mmel_00011113-RA	b5d4ece4bc4ce78f55b158018759af43	339	Pfam	PF00169	PH domain	3	94	2.5e-08	T	31-10-2019	IPR001849	Pleckstrin homology domain
Mmel_00011113-RA	b5d4ece4bc4ce78f55b158018759af43	339	Pfam	PF00169	PH domain	245	336	7.2e-12	T	31-10-2019	IPR001849	Pleckstrin homology domain
Mmel_00011113-RA	b5d4ece4bc4ce78f55b158018759af43	339	Pfam	PF01363	FYVE zinc finger	129	189	9.9e-15	T	31-10-2019	IPR000306	FYVE zinc finger	GO:0046872
Mmel_00009850-RA	5417df659baa23f7b462780a587d1a34	1388	Pfam	PF07703	Alpha-2-macroglobulin family N-terminal region	434	582	1.3e-22	T	31-10-2019	IPR011625	Alpha-2-macroglobulin, N-terminal 2
Mmel_00009850-RA	5417df659baa23f7b462780a587d1a34	1388	Pfam	PF10569	Alpha-macro-globulin thiol-ester bond-forming region	894	923	9.8e-15	T	31-10-2019	IPR019565	Alpha-2-macroglobulin, thiol-ester bond-forming
Mmel_00009850-RA	5417df659baa23f7b462780a587d1a34	1388	Pfam	PF01835	MG2 domain	112	183	6.7e-12	T	31-10-2019	IPR002890	Alpha-2-macroglobulin, N-terminal	GO:0004866
Mmel_00009850-RA	5417df659baa23f7b462780a587d1a34	1388	Pfam	PF07678	A-macroglobulin complement component	944	1190	1.9e-69	T	31-10-2019	IPR011626	Alpha-macroglobulin complement component	GO:0005615
Mmel_00009850-RA	5417df659baa23f7b462780a587d1a34	1388	Pfam	PF00207	Alpha-2-macroglobulin family	730	818	5.4e-26	T	31-10-2019	IPR001599	Alpha-2-macroglobulin	GO:0004866
Mmel_00009850-RA	5417df659baa23f7b462780a587d1a34	1388	Pfam	PF07677	A-macroglobulin receptor	1296	1383	2.8e-23	T	31-10-2019	IPR009048	Alpha-macroglobulin, receptor-binding	GO:0005576
Mmel_00005414-RA	eafa84fdd5dc4826d9f1de9b7cffa65c	780	Pfam	PF00057	Low-density lipoprotein receptor domain class A	176	212	2.1e-09	T	31-10-2019	IPR002172	Low-density lipoprotein (LDL) receptor class A repeat	GO:0005515
Mmel_00005414-RA	eafa84fdd5dc4826d9f1de9b7cffa65c	780	Pfam	PF00057	Low-density lipoprotein receptor domain class A	217	254	1.6e-05	T	31-10-2019	IPR002172	Low-density lipoprotein (LDL) receptor class A repeat	GO:0005515
Mmel_00005414-RA	eafa84fdd5dc4826d9f1de9b7cffa65c	780	Pfam	PF00057	Low-density lipoprotein receptor domain class A	5	31	1.1e-07	T	31-10-2019	IPR002172	Low-density lipoprotein (LDL) receptor class A repeat	GO:0005515
Mmel_00005414-RA	eafa84fdd5dc4826d9f1de9b7cffa65c	780	Pfam	PF00057	Low-density lipoprotein receptor domain class A	86	123	2.3e-12	T	31-10-2019	IPR002172	Low-density lipoprotein (LDL) receptor class A repeat	GO:0005515
Mmel_00005414-RA	eafa84fdd5dc4826d9f1de9b7cffa65c	780	Pfam	PF00057	Low-density lipoprotein receptor domain class A	33	70	2.5e-12	T	31-10-2019	IPR002172	Low-density lipoprotein (LDL) receptor class A repeat	GO:0005515
Mmel_00005414-RA	eafa84fdd5dc4826d9f1de9b7cffa65c	780	Pfam	PF00057	Low-density lipoprotein receptor domain class A	133	169	1.4e-11	T	31-10-2019	IPR002172	Low-density lipoprotein (LDL) receptor class A repeat	GO:0005515
Mmel_00005414-RA	eafa84fdd5dc4826d9f1de9b7cffa65c	780	Pfam	PF14670	Coagulation Factor Xa inhibitory site	257	293	4.1e-11	T	31-10-2019
Mmel_00005414-RA	eafa84fdd5dc4826d9f1de9b7cffa65c	780	Pfam	PF00058	Low-density lipoprotein receptor repeat class B	473	515	1.7e-08	T	31-10-2019	IPR000033	LDLR class B repeat
Mmel_00005414-RA	eafa84fdd5dc4826d9f1de9b7cffa65c	780	Pfam	PF00058	Low-density lipoprotein receptor repeat class B	382	425	2.5e-06	T	31-10-2019	IPR000033	LDLR class B repeat
Mmel_00005414-RA	eafa84fdd5dc4826d9f1de9b7cffa65c	780	Pfam	PF00058	Low-density lipoprotein receptor repeat class B	656	702	5.3e-06	T	31-10-2019	IPR000033	LDLR class B repeat
Mmel_00005414-RA	eafa84fdd5dc4826d9f1de9b7cffa65c	780	Pfam	PF00058	Low-density lipoprotein receptor repeat class B	428	468	1.1e-10	T	31-10-2019	IPR000033	LDLR class B repeat
Mmel_00000012-RA	d03d03b606f1f0d86c1d2f2e6dddb471	659	Pfam	PF01403	Sema domain	70	490	3.9e-66	T	31-10-2019	IPR001627	Sema domain	GO:0005515
Mmel_00000012-RA	d03d03b606f1f0d86c1d2f2e6dddb471	659	Pfam	PF01437	Plexin repeat	512	562	5.9e-10	T	31-10-2019	IPR002165	Plexin repeat
Mmel_00002813-RA	a50cc5a03e1687a2e00db1f0461c17f2	445	Pfam	PF00091	Tubulin/FtsZ family, GTPase domain	3	211	3.1e-69	T	31-10-2019	IPR003008	Tubulin/FtsZ, GTPase domain	GO:0003924	Reactome: R-HSA-380320
Mmel_00002813-RA	a50cc5a03e1687a2e00db1f0461c17f2	445	Pfam	PF03953	Tubulin C-terminal domain	261	381	4.1e-43	T	31-10-2019	IPR018316	Tubulin/FtsZ, 2-layer sandwich domain		Reactome: R-HSA-1445148|Reactome: R-HSA-190840|Reactome: R-HSA-190861|Reactome: R-HSA-2132295|Reactome: R-HSA-2467813|Reactome: R-HSA-2500257|Reactome: R-HSA-3371497|Reactome: R-HSA-380320|Reactome: R-HSA-437239|Reactome: R-HSA-5617833|Reactome: R-HSA-5626467|Reactome: R-HSA-5663220|Reactome: R-HSA-6807878|Reactome: R-HSA-6811434|Reactome: R-HSA-6811436|Reactome: R-HSA-68877|Reactome: R-HSA-88522…
Mmel_00008390-RA	c0ff4288b845b435a443d9e593b514d0	235	Pfam	PF01569	PAP2 superfamily	9	51	1.5e-07	T	31-10-2019	IPR000326	Phosphatidic acid phosphatase type 2/haloperoxidase
Mmel_00001011-RA	b2cad49385e9d357b8e8e1517e7bec79	142	Pfam	PF00378	Enoyl-CoA hydratase/isomerase	56	127	5.5e-12	T	31-10-2019	IPR001753	Enoyl-CoA hydratase/isomerase	GO:0003824|GO:0008152
Mmel_00001111-RA	641f865b22e218a432fcf4a5ba3f220a	542	Pfam	PF00536	SAM domain (Sterile alpha motif)	40	84	1.6e-12	T	31-10-2019	IPR001660	Sterile alpha motif domain	GO:0005515
Mmel_00001111-RA	641f865b22e218a432fcf4a5ba3f220a	542	Pfam	PF10534	Connector enhancer of kinase suppressor of ras	97	189	4.4e-38	T	31-10-2019	IPR017874	CRIC domain
Mmel_00001111-RA	641f865b22e218a432fcf4a5ba3f220a	542	Pfam	PF00595	PDZ domain (Also known as DHR or GLGF)	236	305	1.1e-09	T	31-10-2019	IPR001478	PDZ domain	GO:0005515
Mmel_00001111-RA	641f865b22e218a432fcf4a5ba3f220a	542	Pfam	PF06663	Protein of unknown function (DUF1170)	444	531	9.8e-39	T	31-10-2019	IPR010599	Connector enhancer of kinase suppressor of ras 2	GO:0005737|GO:0009966|GO:0016020
Mmel_00001111-RA	641f865b22e218a432fcf4a5ba3f220a	542	Pfam	PF06663	Protein of unknown function (DUF1170)	349	445	2.8e-40	T	31-10-2019	IPR010599	Connector enhancer of kinase suppressor of ras 2	GO:0005737|GO:0009966|GO:0016020
Mmel_00001757-RA	e0dd67aeff5f0bfb4a0418ddad8d5eb5	732	Pfam	PF00621	RhoGEF domain	322	500	2.2e-45	T	31-10-2019	IPR000219	Dbl homology (DH) domain	GO:0005089|GO:0035023
Mmel_00001757-RA	e0dd67aeff5f0bfb4a0418ddad8d5eb5	732	Pfam	PF00018	SH3 domain	232	276	5.4e-10	T	31-10-2019	IPR001452	SH3 domain	GO:0005515
Mmel_00001757-RA	e0dd67aeff5f0bfb4a0418ddad8d5eb5	732	Pfam	PF00169	PH domain	535	635	9.9e-12	T	31-10-2019	IPR001849	Pleckstrin homology domain
Mmel_00000316-RA	5a4f40bf576421dc8a08034f786a8427	940	Pfam	PF01663	Type I phosphodiesterase / nucleotide pyrophosphatase	279	560	1.8e-31	T	31-10-2019	IPR002591	Type I phosphodiesterase/nucleotide pyrophosphatase/phosphate transferase	GO:0003824
Mmel_00000316-RA	5a4f40bf576421dc8a08034f786a8427	940	Pfam	PF01663	Type I phosphodiesterase / nucleotide pyrophosphatase	166	276	1.6e-41	T	31-10-2019	IPR002591	Type I phosphodiesterase/nucleotide pyrophosphatase/phosphate transferase	GO:0003824
Mmel_00000316-RA	5a4f40bf576421dc8a08034f786a8427	940	Pfam	PF01033	Somatomedin B domain	101	140	8.4e-08	T	31-10-2019	IPR001212	Somatomedin B domain	GO:0005044|GO:0006955|GO:0030247
Mmel_00000316-RA	5a4f40bf576421dc8a08034f786a8427	940	Pfam	PF01033	Somatomedin B domain	58	96	1.1e-08	T	31-10-2019	IPR001212	Somatomedin B domain	GO:0005044|GO:0006955|GO:0030247
Mmel_00000316-RA	5a4f40bf576421dc8a08034f786a8427	940	Pfam	PF01223	DNA/RNA non-specific endonuclease	689	921	4.3e-10	T	31-10-2019	IPR001604	DNA/RNA non-specific endonuclease	GO:0003676|GO:0016787|GO:0046872
Mmel_00006316-RA	963057fe9ff4227778d488d52d3307c6	382	Pfam	PF00169	PH domain	23	105	2.1e-06	T	31-10-2019	IPR001849	Pleckstrin homology domain
Mmel_00012292-RA	c69ca738e5c0366e935a0114f1eed562	1067	Pfam	PF00667	FAD binding domain	654	870	3.2e-66	T	31-10-2019	IPR003097	FAD-binding, type 1	GO:0016491|GO:0055114
Mmel_00012292-RA	c69ca738e5c0366e935a0114f1eed562	1067	Pfam	PF02898	Nitric oxide synthase, oxygenase domain	112	472	1.9e-188	T	31-10-2019	IPR004030	Nitric oxide synthase, N-terminal	GO:0004517|GO:0006809|GO:0055114	Reactome: R-HSA-1222556|Reactome: R-HSA-392154
Mmel_00012292-RA	c69ca738e5c0366e935a0114f1eed562	1067	Pfam	PF00258	Flavodoxin	516	647	6.1e-42	T	31-10-2019	IPR008254	Flavodoxin/nitric oxide synthase	GO:0010181
Mmel_00012292-RA	c69ca738e5c0366e935a0114f1eed562	1067	Pfam	PF00175	Oxidoreductase NAD-binding domain	902	1015	2.9e-19	T	31-10-2019	IPR001433	Oxidoreductase FAD/NAD(P)-binding	GO:0016491|GO:0055114
Mmel_00004721-RA	719bc6e3d63b175b1e08633d77ed661b	2606	Pfam	PF00632	HECT-domain (ubiquitin-transferase)	2231	2605	7.4e-74	T	31-10-2019	IPR000569	HECT domain	GO:0004842	MetaCyc: PWY-7511|Reactome: R-HSA-983168
Mmel_00004721-RA	719bc6e3d63b175b1e08633d77ed661b	2606	Pfam	PF07738	Sad1 / UNC-like C-terminal	1146	1275	9.2e-24	T	31-10-2019	IPR012919	SUN domain
Mmel_00004721-RA	719bc6e3d63b175b1e08633d77ed661b	2606	Pfam	PF06701	Mib_herc2	1313	1371	5.3e-23	T	31-10-2019	IPR010606	Mib-herc2	GO:0004842|GO:0016567|GO:0046872
Mmel_00004721-RA	719bc6e3d63b175b1e08633d77ed661b	2606	Pfam	PF12796	Ankyrin repeats (3 copies)	386	466	9.5e-10	T	31-10-2019	IPR020683	Ankyrin repeat-containing domain
Mmel_00004231-RA	2b2a2b7ca5546e2b40508340b1aa85a0	303	Pfam	PF00595	PDZ domain (Also known as DHR or GLGF)	171	221	3.4e-09	T	31-10-2019	IPR001478	PDZ domain	GO:0005515
Mmel_00012755-RA	5e2aeb52b297b56b2fe142ea1171c142	1388	Pfam	PF02373	JmjC domain, hydroxylase	395	511	1.3e-44	T	31-10-2019	IPR003347	JmjC domain
Mmel_00012755-RA	5e2aeb52b297b56b2fe142ea1171c142	1388	Pfam	PF08429	PLU-1-like protein	644	974	2.7e-92	T	31-10-2019	IPR013637	Lysine-specific demethylase-like domain		Reactome: R-HSA-3214842
Mmel_00012755-RA	5e2aeb52b297b56b2fe142ea1171c142	1388	Pfam	PF01388	ARID/BRIGHT DNA binding domain	34	116	1.9e-17	T	31-10-2019	IPR001606	ARID DNA-binding domain	GO:0003677
Mmel_00012755-RA	5e2aeb52b297b56b2fe142ea1171c142	1388	Pfam	PF00628	PHD-finger	221	266	1.1e-11	T	31-10-2019	IPR019787	Zinc finger, PHD-finger
Mmel_00012755-RA	5e2aeb52b297b56b2fe142ea1171c142	1388	Pfam	PF00628	PHD-finger	1336	1380	1.5e-07	T	31-10-2019	IPR019787	Zinc finger, PHD-finger
Mmel_00012755-RA	5e2aeb52b297b56b2fe142ea1171c142	1388	Pfam	PF02928	C5HC2 zinc finger	579	631	1.4e-13	T	31-10-2019	IPR004198	Zinc finger, C5HC2-type		Reactome: R-HSA-3214842
Mmel_00001679-RA	ba08df6700cb8de47c5db660870b0d73	1453	Pfam	PF01501	Glycosyl transferase family 8	1179	1390	2.1e-06	T	31-10-2019	IPR002495	Glycosyl transferase, family 8	GO:0016757
Mmel_00001679-RA	ba08df6700cb8de47c5db660870b0d73	1453	Pfam	PF06427	UDP-glucose:Glycoprotein Glucosyltransferase	449	1130	2.3e-201	T	31-10-2019	IPR009448	UDP-glucose:Glycoprotein Glucosyltransferase	GO:0003980|GO:0006486	Reactome: R-HSA-901032
Mmel_00001679-RA	ba08df6700cb8de47c5db660870b0d73	1453	Pfam	PF06427	UDP-glucose:Glycoprotein Glucosyltransferase	32	447	1.5e-133	T	31-10-2019	IPR009448	UDP-glucose:Glycoprotein Glucosyltransferase	GO:0003980|GO:0006486	Reactome: R-HSA-901032
Mmel_00001676-RA	5e385a827fe7ad664e6c5b453de08797	388	Pfam	PF00642	Zinc finger C-x8-C-x5-C-x3-H type (and similar)	215	239	0.0002	T	31-10-2019	IPR000571	Zinc finger, CCCH-type	GO:0046872
Mmel_00006220-RA	c14ac06c4a343786bdf72d9ac49d538a	1484	Pfam	PF00169	PH domain	797	897	1.5e-08	T	31-10-2019	IPR001849	Pleckstrin homology domain
Mmel_00006220-RA	c14ac06c4a343786bdf72d9ac49d538a	1484	Pfam	PF00169	PH domain	615	709	3.6e-17	T	31-10-2019	IPR001849	Pleckstrin homology domain
Mmel_00006220-RA	c14ac06c4a343786bdf72d9ac49d538a	1484	Pfam	PF00788	Ras association (RalGDS/AF-6) domain	1112	1152	0.00046	T	31-10-2019	IPR000159	Ras-associating (RA) domain	GO:0007165
Mmel_00006220-RA	c14ac06c4a343786bdf72d9ac49d538a	1484	Pfam	PF00784	MyTH4 domain	989	1094	1.5e-28	T	31-10-2019	IPR000857	MyTH4 domain	GO:0005856
Mmel_00006220-RA	c14ac06c4a343786bdf72d9ac49d538a	1484	Pfam	PF00373	FERM central domain	1199	1359	1.8e-20	T	31-10-2019	IPR019748	FERM central domain
Mmel_00006220-RA	c14ac06c4a343786bdf72d9ac49d538a	1484	Pfam	PF16735	Unconventional myosin-X coiled coil domain	274	325	6.5e-18	T	31-10-2019	IPR031971	Unconventional myosin-X, coiled coil domain		Reactome: R-HSA-2029482|Reactome: R-HSA-373752
Mmel_00006220-RA	c14ac06c4a343786bdf72d9ac49d538a	1484	Pfam	PF00612	IQ calmodulin-binding motif	145	165	0.09	T	31-10-2019	IPR000048	IQ motif, EF-hand binding site	GO:0005515
Mmel_00006220-RA	c14ac06c4a343786bdf72d9ac49d538a	1484	Pfam	PF00612	IQ calmodulin-binding motif	192	211	0.24	T	31-10-2019	IPR000048	IQ motif, EF-hand binding site	GO:0005515
Mmel_00006220-RA	c14ac06c4a343786bdf72d9ac49d538a	1484	Pfam	PF00063	Myosin head (motor domain)	48	129	1.2e-18	T	31-10-2019	IPR001609	Myosin head, motor domain	GO:0003774|GO:0005524|GO:0016459
Mmel_00009854-RA	33ac69f40f02edff007d7e25b0799a38	213	Pfam	PF05507	Microfibril-associated glycoprotein (MAGP)	105	176	8.5e-33	T	31-10-2019	IPR008673	Microfibril-associated glycoprotein	GO:0001527	Reactome: R-HSA-1566948|Reactome: R-HSA-2129379
Mmel_00001756-RA	d3d453abfcce7a8ce77a09b36fbfbfa4	347	Pfam	PF01391	Collagen triple helix repeat (20 copies)	146	200	9.3e-08	T	31-10-2019	IPR008160	Collagen triple helix repeat
Mmel_00001756-RA	d3d453abfcce7a8ce77a09b36fbfbfa4	347	Pfam	PF01391	Collagen triple helix repeat (20 copies)	25	79	4.8e-10	T	31-10-2019	IPR008160	Collagen triple helix repeat
Mmel_00001756-RA	d3d453abfcce7a8ce77a09b36fbfbfa4	347	Pfam	PF00386	C1q domain	206	332	2.2e-38	T	31-10-2019	IPR001073	C1q domain
Mmel_00004941-RA	e01e947596e0ca35475e15a337a7a75a	216	Pfam	PF01399	PCI domain	24	95	1.5e-06	T	31-10-2019	IPR000717	Proteasome component (PCI) domain
Mmel_00012073-RA	e520f4542b128398bc725255a883120b	191	Pfam	PF00071	Ras family	5	175	1.3e-53	T	31-10-2019	IPR001806	Small GTPase superfamily	GO:0003924|GO:0005525
Mmel_00007881-RA	cb20ff714ed877275b47c5d06b9d5a74	481	Pfam	PF09751	Nuclear protein Es2	39	404	1.7e-76	T	31-10-2019	IPR019148	Nuclear protein DGCR14/ESS-2	GO:0005634
Mmel_00011215-RA	a45798fe71d56a1313b3c40c0a250e98	687	Pfam	PF01431	Peptidase family M13	497	687	2.3e-51	T	31-10-2019	IPR018497	Peptidase M13, C-terminal domain	GO:0004222|GO:0006508
Mmel_00011215-RA	a45798fe71d56a1313b3c40c0a250e98	687	Pfam	PF05649	Peptidase family M13	78	467	6.4e-89	T	31-10-2019	IPR008753	Peptidase M13, N-terminal domain	GO:0006508
Mmel_00010690-RA	ae29df8e8389896c48e67fbc481582f4	1914	Pfam	PF13086	AAA domain	880	1037	9.7e-14	T	31-10-2019
Mmel_00010690-RA	ae29df8e8389896c48e67fbc481582f4	1914	Pfam	PF13086	AAA domain	618	660	2.9e-06	T	31-10-2019
Mmel_00010690-RA	ae29df8e8389896c48e67fbc481582f4	1914	Pfam	PF13087	AAA domain	1050	1233	5.8e-39	T	31-10-2019
Mmel_00012900-RA	2cda94ac16ff14ecf2417a43f8a651e4	526	Pfam	PF02257	RFX DNA-binding domain	119	167	1.3e-15	T	31-10-2019	IPR003150	DNA-binding RFX-type winged-helix domain	GO:0003677|GO:0006355
Mmel_00012900-RA	2cda94ac16ff14ecf2417a43f8a651e4	526	Pfam	PF04589	RFX1 transcription activation region	3	74	4.5e-20	T	31-10-2019	IPR007668	RFX1 transcription activation region	GO:0003677|GO:0005634|GO:0006355
Mmel_00011201-RA	b92c84a2546b7abad31679e9f0132ee2	1106	Pfam	PF14745	WASH complex subunit 7, N-terminal	36	536	3.8e-203	T	31-10-2019	IPR028191	WASH complex subunit 7, N-terminal
Mmel_00011201-RA	b92c84a2546b7abad31679e9f0132ee2	1106	Pfam	PF14746	WASH complex subunit 7, C-terminal	899	1068	1.5e-75	T	31-10-2019	IPR028283	WASH complex subunit 7, C-terminal
Mmel_00011201-RA	b92c84a2546b7abad31679e9f0132ee2	1106	Pfam	PF14744	WASH complex subunit 7	538	882	7.2e-174	T	31-10-2019	IPR028282	WASH complex subunit 7, central domain
Mmel_00010242-RA	9ea4468c2ed9c1b8e30f4087b342ae8b	322	Pfam	PF03820	Tricarboxylate carrier	16	322	2.7e-153	T	31-10-2019	IPR004686	Tricarboxylate/iron carrier	GO:0006811|GO:0015075|GO:0016020|GO:0055085
Mmel_00013401-RA	05fc7b26105e5cb0315cd36c41c51fc2	250	Pfam	PF01172	Shwachman-Bodian-Diamond syndrome (SBDS) protein	14	101	5.7e-32	T	31-10-2019	IPR019783	Ribosome maturation protein SBDS, N-terminal
Mmel_00013401-RA	05fc7b26105e5cb0315cd36c41c51fc2	250	Pfam	PF09377	SBDS protein C-terminal domain	107	224	6.5e-39	T	31-10-2019	IPR018978	Ribosome maturation protein SBDS, C-terminal	GO:0042254
Mmel_00008675-RA	61a81636e2290f7caf656fd2b6204483	693	Pfam	PF00046	Homeobox domain	300	341	0.00016	T	31-10-2019	IPR001356	Homeobox domain	GO:0003677
Mmel_00008675-RA	61a81636e2290f7caf656fd2b6204483	693	Pfam	PF11569	Homeodomain leucine-zipper encoding, Homez	567	607	1.1e-10	T	31-10-2019	IPR024578	Homez, homeobox domain
Mmel_00004794-RA	8744a730521f26869f7b3a7745e5689c	596	Pfam	PF00008	EGF-like domain	235	263	8e-05	T	31-10-2019	IPR000742	EGF-like domain
Mmel_00004794-RA	8744a730521f26869f7b3a7745e5689c	596	Pfam	PF00008	EGF-like domain	196	227	2.1e-05	T	31-10-2019	IPR000742	EGF-like domain
Mmel_00004794-RA	8744a730521f26869f7b3a7745e5689c	596	Pfam	PF02210	Laminin G domain	36	164	3.9e-24	T	31-10-2019	IPR001791	Laminin G domain
Mmel_00004794-RA	8744a730521f26869f7b3a7745e5689c	596	Pfam	PF07645	Calcium-binding EGF domain	269	300	1e-06	T	31-10-2019	IPR001881	EGF-like calcium-binding domain	GO:0005509
Mmel_00009926-RA	a49d057e283022d48b2233918df22df9	87	Pfam	PF09750	Alternative splicing regulator	46	85	4e-14	T	31-10-2019	IPR019147	Suppressor of white apricot N-terminal domain
Mmel_00002684-RA	ec168db25dbd53298a71904122d9ea2f	226	Pfam	PF00335	Tetraspanin family	6	137	5.7e-21	T	31-10-2019	IPR018499	Tetraspanin/Peripherin	GO:0016021
Mmel_00005710-RA	3b52d86e2a188f5b541091c0fdd46322	403	Pfam	PF09346	SMI1 / KNR4 family (SUKH-1)	125	225	6.8e-09	T	31-10-2019	IPR018958	Knr4/Smi1-like domain
Mmel_00005710-RA	3b52d86e2a188f5b541091c0fdd46322	403	Pfam	PF12937	F-box-like	17	59	6.9e-06	T	31-10-2019	IPR001810	F-box domain	GO:0005515
Mmel_00005710-RA	3b52d86e2a188f5b541091c0fdd46322	403	Pfam	PF04379	ApaG domain	297	385	1.3e-29	T	31-10-2019	IPR007474	ApaG domain
Mmel_00008208-RA	cd158965fdb8ad9578f85a1e24c6aa71	415	Pfam	PF12368	Rhodanase C-terminal	326	389	2.6e-14	T	31-10-2019	IPR022111	Rhodanase, C-terminal
Mmel_00008208-RA	cd158965fdb8ad9578f85a1e24c6aa71	415	Pfam	PF00581	Rhodanese-like domain	230	318	1.5e-06	T	31-10-2019	IPR001763	Rhodanese-like domain
Mmel_00009595-RA	89acf828e6495fdf57c644c3c26a8663	1181	Pfam	PF00431	CUB domain	50	149	1.9e-12	T	31-10-2019	IPR000859	CUB domain
Mmel_00009595-RA	89acf828e6495fdf57c644c3c26a8663	1181	Pfam	PF13854	Kelch motif	295	331	4e-05	T	31-10-2019
Mmel_00009595-RA	89acf828e6495fdf57c644c3c26a8663	1181	Pfam	PF01344	Kelch motif	458	508	9.8e-06	T	31-10-2019	IPR006652	Kelch repeat type 1	GO:0005515
Mmel_00009595-RA	89acf828e6495fdf57c644c3c26a8663	1181	Pfam	PF01344	Kelch motif	244	288	1.6e-05	T	31-10-2019	IPR006652	Kelch repeat type 1	GO:0005515
Mmel_00009595-RA	89acf828e6495fdf57c644c3c26a8663	1181	Pfam	PF00059	Lectin C-type domain	710	820	1.3e-20	T	31-10-2019	IPR001304	C-type lectin-like
Mmel_00009595-RA	89acf828e6495fdf57c644c3c26a8663	1181	Pfam	PF01437	Plexin repeat	886	961	2.3e-12	T	31-10-2019	IPR002165	Plexin repeat
Mmel_00000234-RA	d3d935809c6121c53d7fb93387b4d004	342	Pfam	PF01462	Leucine rich repeat N-terminal domain	40	68	4e-08	T	31-10-2019	IPR000372	Leucine-rich repeat N-terminal domain
Mmel_00000234-RA	d3d935809c6121c53d7fb93387b4d004	342	Pfam	PF13855	Leucine rich repeat	214	271	8.8e-11	T	31-10-2019	IPR001611	Leucine-rich repeat	GO:0005515
Mmel_00000234-RA	d3d935809c6121c53d7fb93387b4d004	342	Pfam	PF13855	Leucine rich repeat	69	105	1.2e-07	T	31-10-2019	IPR001611	Leucine-rich repeat	GO:0005515
Mmel_00000234-RA	d3d935809c6121c53d7fb93387b4d004	342	Pfam	PF13855	Leucine rich repeat	141	201	5.1e-14	T	31-10-2019	IPR001611	Leucine-rich repeat	GO:0005515
Mmel_00013807-RA	4209e24392d38b83456d20d93d6f6ef1	823	Pfam	PF02898	Nitric oxide synthase, oxygenase domain	2	49	4.2e-18	T	31-10-2019	IPR004030	Nitric oxide synthase, N-terminal	GO:0004517|GO:0006809|GO:0055114	Reactome: R-HSA-1222556|Reactome: R-HSA-392154
Mmel_00013807-RA	4209e24392d38b83456d20d93d6f6ef1	823	Pfam	PF02898	Nitric oxide synthase, oxygenase domain	48	189	6.7e-74	T	31-10-2019	IPR004030	Nitric oxide synthase, N-terminal	GO:0004517|GO:0006809|GO:0055114	Reactome: R-HSA-1222556|Reactome: R-HSA-392154
Mmel_00013807-RA	4209e24392d38b83456d20d93d6f6ef1	823	Pfam	PF00667	FAD binding domain	454	670	1.8e-77	T	31-10-2019	IPR003097	FAD-binding, type 1	GO:0016491|GO:0055114
Mmel_00013807-RA	4209e24392d38b83456d20d93d6f6ef1	823	Pfam	PF00258	Flavodoxin	224	397	1.7e-52	T	31-10-2019	IPR008254	Flavodoxin/nitric oxide synthase	GO:0010181
Mmel_00004799-RA	fe258c202643e9340e5c395cdf06e1bd	269	Pfam	PF01490	Transmembrane amino acid transporter protein	39	268	2.1e-38	T	31-10-2019	IPR013057	Amino acid transporter, transmembrane domain
Mmel_00012202-RA	51ff9a19b0ce2858df98ff44ba343a2e	225	Pfam	PF00046	Homeobox domain	143	199	9.5e-23	T	31-10-2019	IPR001356	Homeobox domain	GO:0003677
Mmel_00004508-RA	109c5e097a0ce25925b674218c340366	286	Pfam	PF03370	Carbohydrate/starch-binding module (family 21)	130	233	1.1e-34	T	31-10-2019	IPR005036	CBM21 (carbohydrate binding type-21) domain	GO:0005515
Mmel_00008798-RA	e9ea7f074064b6c4f65eedf0e9c72f17	676	Pfam	PF17392	Urocanase C-terminal domain	440	647	2.3e-88	T	31-10-2019	IPR035401	Urocanase, C-terminal domain		KEGG: 00340+4.2.1.49|MetaCyc: PWY-5028|MetaCyc: PWY-5030|Reactome: R-HSA-70921
Mmel_00008798-RA	e9ea7f074064b6c4f65eedf0e9c72f17	676	Pfam	PF17391	Urocanase N-terminal domain	85	211	4.9e-59	T	31-10-2019	IPR035400	Urocanase, N-terminal domain		KEGG: 00340+4.2.1.49|MetaCyc: PWY-5028|MetaCyc: PWY-5030|Reactome: R-HSA-70921
Mmel_00008798-RA	e9ea7f074064b6c4f65eedf0e9c72f17	676	Pfam	PF01175	Urocanase Rossmann-like domain	214	437	1.2e-87	T	31-10-2019	IPR035085	Urocanase, Rossmann-like domain		KEGG: 00340+4.2.1.49|MetaCyc: PWY-5028|MetaCyc: PWY-5030|Reactome: R-HSA-70921
Mmel_00002232-RA	6248143b22cf27c56a2f2dd98729678c	267	Pfam	PF03798	TLC domain	48	244	1.1e-31	T	31-10-2019	IPR006634	TRAM/LAG1/CLN8 homology domain	GO:0016021
Mmel_00004507-RA	f537976e6015d9158d7e26b88c68d960	212	Pfam	PF14670	Coagulation Factor Xa inhibitory site	127	162	4.7e-09	T	31-10-2019
Mmel_00004507-RA	f537976e6015d9158d7e26b88c68d960	212	Pfam	PF00057	Low-density lipoprotein receptor domain class A	87	123	5.8e-08	T	31-10-2019	IPR002172	Low-density lipoprotein (LDL) receptor class A repeat	GO:0005515
Mmel_00004507-RA	f537976e6015d9158d7e26b88c68d960	212	Pfam	PF00057	Low-density lipoprotein receptor domain class A	50	85	3.2e-10	T	31-10-2019	IPR002172	Low-density lipoprotein (LDL) receptor class A repeat	GO:0005515
Mmel_00004507-RA	f537976e6015d9158d7e26b88c68d960	212	Pfam	PF00057	Low-density lipoprotein receptor domain class A	13	46	5.4e-06	T	31-10-2019	IPR002172	Low-density lipoprotein (LDL) receptor class A repeat	GO:0005515
Mmel_00004507-RA	f537976e6015d9158d7e26b88c68d960	212	Pfam	PF07645	Calcium-binding EGF domain	164	202	4.9e-08	T	31-10-2019	IPR001881	EGF-like calcium-binding domain	GO:0005509
Mmel_00002522-RA	ab7541b9a970f8373e53915509b50d9c	634	Pfam	PF13855	Leucine rich repeat	240	297	2e-07	T	31-10-2019	IPR001611	Leucine-rich repeat	GO:0005515
Mmel_00002522-RA	ab7541b9a970f8373e53915509b50d9c	634	Pfam	PF13306	Leucine rich repeats (6 copies)	86	208	2e-14	T	31-10-2019	IPR026906	Leucine rich repeat 5
Mmel_00002522-RA	ab7541b9a970f8373e53915509b50d9c	634	Pfam	PF07679	Immunoglobulin I-set domain	349	438	1.2e-13	T	31-10-2019	IPR013098	Immunoglobulin I-set
Mmel_00002522-RA	ab7541b9a970f8373e53915509b50d9c	634	Pfam	PF00560	Leucine Rich Repeat	216	238	0.69	T	31-10-2019	IPR001611	Leucine-rich repeat	GO:0005515
Mmel_00007764-RA	daf54dd606bc299b5b2ddd1289b53299	316	Pfam	PF02752	Arrestin (or S-antigen), C-terminal domain	95	221	1.1e-19	T	31-10-2019	IPR011022	Arrestin C-terminal-like domain
Mmel_00007764-RA	daf54dd606bc299b5b2ddd1289b53299	316	Pfam	PF00339	Arrestin (or S-antigen), N-terminal domain	11	71	2e-18	T	31-10-2019	IPR011021	Arrestin-like, N-terminal
Mmel_00013459-RA	98963f54a2ee00232f01884081c307b7	324	Pfam	PF02218	Repeat in HS1/Cortactin	151	184	5.7e-18	T	31-10-2019	IPR003134	Hs1/Cortactin
Mmel_00013459-RA	98963f54a2ee00232f01884081c307b7	324	Pfam	PF02218	Repeat in HS1/Cortactin	217	252	5.4e-17	T	31-10-2019	IPR003134	Hs1/Cortactin
Mmel_00013459-RA	98963f54a2ee00232f01884081c307b7	324	Pfam	PF02218	Repeat in HS1/Cortactin	254	277	3.1e-11	T	31-10-2019	IPR003134	Hs1/Cortactin
Mmel_00013459-RA	98963f54a2ee00232f01884081c307b7	324	Pfam	PF02218	Repeat in HS1/Cortactin	114	149	1.2e-17	T	31-10-2019	IPR003134	Hs1/Cortactin
Mmel_00011779-RA	a0aaf00000eee1d40cd488d9c03c159b	456	Pfam	PF01532	Glycosyl hydrolase family 47	1	390	4.2e-104	T	31-10-2019	IPR001382	Glycoside hydrolase family 47	GO:0004571|GO:0005509|GO:0016020	KEGG: 00510+3.2.1.113|KEGG: 00513+3.2.1.113|MetaCyc: PWY-7919
Mmel_00007427-RA	40323d549b62aef38e50b346bbd02057	708	Pfam	PF03009	Glycerophosphoryl diester phosphodiesterase family	354	642	1.8e-61	T	31-10-2019	IPR030395	Glycerophosphodiester phosphodiesterase domain	GO:0006629|GO:0008081
Mmel_00007427-RA	40323d549b62aef38e50b346bbd02057	708	Pfam	PF00686	Starch binding domain	35	121	2.3e-12	T	31-10-2019	IPR002044	Carbohydrate binding module family 20	GO:2001070
Mmel_00008161-RA	efdc1abe23248902561a5ee804b57938	726	Pfam	PF12330	Haspin like kinase domain	10	96	7.6e-06	T	31-10-2019
Mmel_00008161-RA	efdc1abe23248902561a5ee804b57938	726	Pfam	PF00069	Protein kinase domain	1	201	3.3e-61	T	31-10-2019	IPR000719	Protein kinase domain	GO:0004672|GO:0005524|GO:0006468
Mmel_00008505-RA	143782fd53a907973835b0894d51a194	907	Pfam	PF13705	TRC8 N-terminal domain	36	533	1.2e-153	T	31-10-2019	IPR025754	TRC8 N-terminal domain
Mmel_00008505-RA	143782fd53a907973835b0894d51a194	907	Pfam	PF13639	Ring finger domain	563	601	6.7e-10	T	31-10-2019	IPR001841	Zinc finger, RING-type
Mmel_00005622-RA	c43b16b5145a434031bc778240ec6073	593	Pfam	PF05794	T-complex protein 11	151	573	6.5e-107	T	31-10-2019	IPR008862	T-complex 11
Mmel_00000238-RA	6fb3b1018d6a56042afaf6ecdb845aa7	1411	Pfam	PF01363	FYVE zinc finger	1348	1410	3.6e-20	T	31-10-2019	IPR000306	FYVE zinc finger	GO:0046872
Mmel_00014424-RA	42b84fa585c26563b360d75e015c5df4	1027	Pfam	PF00397	WW domain	327	355	3.9e-10	T	31-10-2019	IPR001202	WW domain	GO:0005515
Mmel_00014424-RA	42b84fa585c26563b360d75e015c5df4	1027	Pfam	PF02886	LBP / BPI / CETP family, C-terminal domain	205	293	8e-22	T	31-10-2019	IPR001124	Lipid-binding serum glycoprotein, C-terminal	GO:0008289
Mmel_00014424-RA	42b84fa585c26563b360d75e015c5df4	1027	Pfam	PF12237	Phosphorylated CTD interacting factor 1 WW domain	762	937	2.7e-69	T	31-10-2019	IPR022035	Phosphorylated CTD interacting factor 1, WW domain
Mmel_00014424-RA	42b84fa585c26563b360d75e015c5df4	1027	Pfam	PF01273	LBP / BPI / CETP family, N-terminal domain	44	167	4e-19	T	31-10-2019	IPR017942	Lipid-binding serum glycoprotein, N-terminal	GO:0008289
Mmel_00001025-RA	ed8e32777652e103ddca61f75e4d99dd	295	Pfam	PF00536	SAM domain (Sterile alpha motif)	3	62	1.1e-11	T	31-10-2019	IPR001660	Sterile alpha motif domain	GO:0005515
Mmel_00004925-RA	622869be384cb20070c2d01560cfbb18	677	Pfam	PF15966	F-box	564	616	2.5e-19	T	31-10-2019	IPR001810	F-box domain	GO:0005515
Mmel_00004925-RA	622869be384cb20070c2d01560cfbb18	677	Pfam	PF15965	TRAF-like zinc-finger	11	102	1.8e-39	T	31-10-2019	IPR001293	Zinc finger, TRAF-type	GO:0008270
Mmel_00005873-RA	677d5c6699767dd97297ea07d1c84474	245	Pfam	PF00019	Transforming growth factor beta like domain	147	244	3.8e-24	T	31-10-2019	IPR001839	Transforming growth factor-beta, C-terminal	GO:0008083
Mmel_00005873-RA	677d5c6699767dd97297ea07d1c84474	245	Pfam	PF00688	TGF-beta propeptide	5	85	2.9e-12	T	31-10-2019	IPR001111	TGF-beta, propeptide
Mmel_00009578-RA	4f936ed3e9b0af1a74f863e93e0c3a1c	337	Pfam	PF01403	Sema domain	12	327	2e-105	T	31-10-2019	IPR001627	Sema domain	GO:0005515
Mmel_00012477-RA	db7c0bed1c465915c0579a743e537933	419	Pfam	PF00069	Protein kinase domain	57	367	2.7e-35	T	31-10-2019	IPR000719	Protein kinase domain	GO:0004672|GO:0005524|GO:0006468
Mmel_00006573-RA	f7ef0c2efe7b57e4c19cad9ead2146e8	140	Pfam	PF10217	Uncharacterized conserved protein (DUF2039)	8	75	7.2e-25	T	31-10-2019	IPR019351	Protein of unknown function DUF2039
Mmel_00011777-RA	d22b02c38d4171dcb818e4b883a0bf78	179	Pfam	PF13927	Immunoglobulin domain	86	163	5.1e-15	T	31-10-2019
Mmel_00007673-RA	1ef1546cb412c6aa7e49c9ff3d5d7bbe	556	Pfam	PF16019	Cysteine/serine-rich nuclear protein N-terminus	35	253	2.7e-104	T	31-10-2019	IPR031972	Cysteine/serine-rich nuclear protein, N-terminal domain
Mmel_00006724-RA	97271ffc3ae88117da113e4d8babf1d5	1877	Pfam	PF00595	PDZ domain (Also known as DHR or GLGF)	1016	1071	2.2e-08	T	31-10-2019	IPR001478	PDZ domain	GO:0005515
Mmel_00006724-RA	97271ffc3ae88117da113e4d8babf1d5	1877	Pfam	PF08926	Domain of unknown function (DUF1908)	94	346	1.1e-131	T	31-10-2019	IPR015022	Microtubule-associated serine/threonine-protein kinase, domain	GO:0000287|GO:0004674|GO:0005524|GO:0006468	KEGG: 04150+2.7.11.1|KEGG: 04151+2.7.11.1|KEGG: 04714+2.7.11.1|KEGG: 04926+2.7.11.1|KEGG: 05165+2.7.11.1
Mmel_00006724-RA	97271ffc3ae88117da113e4d8babf1d5	1877	Pfam	PF00069	Protein kinase domain	383	656	1.8e-62	T	31-10-2019	IPR000719	Protein kinase domain	GO:0004672|GO:0005524|GO:0006468
Mmel_00011623-RA	d79d369ac942bf642f59ae536356ee40	1414	Pfam	PF12114	Period protein 2/3C-terminal region	1197	1391	1.4e-92	T	31-10-2019	IPR022728	Period circadian-like, C-terminal
Mmel_00006177-RA	00c7ce74c83a75bbd56791ed49f9bf43	1049	Pfam	PF00082	Subtilase family	217	472	1.2e-39	T	31-10-2019	IPR000209	Peptidase S8/S53 domain	GO:0004252|GO:0006508
Mmel_00002103-RA	554ac44b19090fec2f665fb5fd1535ab	175	Pfam	PF13499	EF-hand domain pair	105	168	2.5e-08	T	31-10-2019	IPR002048	EF-hand domain	GO:0005509
Mmel_00002103-RA	554ac44b19090fec2f665fb5fd1535ab	175	Pfam	PF00254	FKBP-type peptidyl-prolyl cis-trans isomerase	3	94	9.4e-31	T	31-10-2019	IPR001179	FKBP-type peptidyl-prolyl cis-trans isomerase domain
Mmel_00008567-RA	b6679e0b32936b55a66698dc32238029	246	Pfam	PF01868	Domain of unknown function UPF0086	155	236	1.8e-25	T	31-10-2019	IPR002730	Ribonuclease P/MRP, subunit p29	GO:0003723|GO:0004540|GO:0006396|GO:0030677	Reactome: R-HSA-6784531
Mmel_00014383-RA	6c8f7c6434ab591d113ff1918f808b78	444	Pfam	PF02867	Ribonucleotide reductase, barrel domain	355	438	3.9e-22	T	31-10-2019	IPR000788	Ribonucleotide reductase large subunit, C-terminal	GO:0006260|GO:0055114	KEGG: 00230+1.17.4.1|KEGG: 00240+1.17.4.1|KEGG: 00480+1.17.4.1|KEGG: 00983+1.17.4.1|MetaCyc: PWY-6545|MetaCyc: PWY-7184|MetaCyc: PWY-7198|MetaCyc: PWY-7210|MetaCyc: PWY-7220|MetaCyc: PWY-7222|MetaCyc: PWY-7226|MetaCyc: PWY-7227|Reactome: R-HSA-499943
Mmel_00014383-RA	6c8f7c6434ab591d113ff1918f808b78	444	Pfam	PF02867	Ribonucleotide reductase, barrel domain	3	322	1.7e-119	T	31-10-2019	IPR000788	Ribonucleotide reductase large subunit, C-terminal	GO:0006260|GO:0055114	KEGG: 00230+1.17.4.1|KEGG: 00240+1.17.4.1|KEGG: 00480+1.17.4.1|KEGG: 00983+1.17.4.1|MetaCyc: PWY-6545|MetaCyc: PWY-7184|MetaCyc: PWY-7198|MetaCyc: PWY-7210|MetaCyc: PWY-7220|MetaCyc: PWY-7222|MetaCyc: PWY-7226|MetaCyc: PWY-7227|Reactome: R-HSA-499943
Mmel_00013362-RA	d4a8f000d9fee5499ccbf6eb3372cb88	403	Pfam	PF01436	NHL repeat	270	289	0.00026	T	31-10-2019	IPR001258	NHL repeat	GO:0005515
Mmel_00000950-RA	044aaf2cda2eca2f4fbac741c98a67bf	556	Pfam	PF15280	Protein aurora borealis N-terminus	109	162	1.6e-19	T	31-10-2019	IPR023252	Aurora borealis protein		Reactome: R-HSA-2565942
Mmel_00000950-RA	044aaf2cda2eca2f4fbac741c98a67bf	556	Pfam	PF15280	Protein aurora borealis N-terminus	11	90	1.2e-25	T	31-10-2019	IPR023252	Aurora borealis protein		Reactome: R-HSA-2565942
Mmel_00005542-RA	eb3bdac1493452496fca3f46aacb0d0d	206	Pfam	PF00810	ER lumen protein retaining receptor	28	169	1.4e-54	T	31-10-2019	IPR000133	ER lumen protein retaining receptor	GO:0006621|GO:0016021|GO:0046923	Reactome: R-HSA-6807878|Reactome: R-HSA-6811434
Mmel_00001023-RA	4912ad85ececd725e61ab81c337978f1	622	Pfam	PF00620	RhoGAP domain	300	444	3e-42	T	31-10-2019	IPR000198	Rho GTPase-activating protein domain	GO:0007165	Reactome: R-HSA-194840
Mmel_00006768-RA	69b724ef285b184714370f5f8a826ec1	824	Pfam	PF09329	Primase zinc finger	329	374	1.2e-16	T	31-10-2019	IPR015408	Zinc finger, Mcm10/DnaG-type	GO:0005634|GO:0006260	Reactome: R-HSA-176187|Reactome: R-HSA-68962|Reactome: R-HSA-69300
Mmel_00006768-RA	69b724ef285b184714370f5f8a826ec1	824	Pfam	PF09332	Mcm10 replication factor	472	822	4.6e-148	T	31-10-2019	IPR015411	Replication factor Mcm10, C-terminal		Reactome: R-HSA-176187|Reactome: R-HSA-68962|Reactome: R-HSA-69300
Mmel_00009265-RA	22fb2029c398dd8da8f7fb6b9f444b9b	573	Pfam	PF00168	C2 domain	190	250	8.7e-06	T	31-10-2019	IPR000008	C2 domain
Mmel_00000290-RA	8f9fc49fc5010c331d7efc92234196ed	85	Pfam	PF04868	Retinal cGMP phosphodiesterase, gamma subunit	10	85	1.2e-47	T	31-10-2019	IPR006952	Retinal cGMP phosphodiesterase, gamma subunit	GO:0004114|GO:0007601|GO:0030553	KEGG: 00230+3.1.4.35
Mmel_00008073-RA	6b1102b46a11ab5bc961cce5285b9ac9	538	Pfam	PF00035	Double-stranded RNA binding motif	15	78	5e-16	T	31-10-2019	IPR014720	Double-stranded RNA-binding domain
Mmel_00008073-RA	6b1102b46a11ab5bc961cce5285b9ac9	538	Pfam	PF00035	Double-stranded RNA binding motif	113	177	8e-14	T	31-10-2019	IPR014720	Double-stranded RNA-binding domain
Mmel_00008073-RA	6b1102b46a11ab5bc961cce5285b9ac9	538	Pfam	PF00069	Protein kinase domain	290	493	1.1e-44	T	31-10-2019	IPR000719	Protein kinase domain	GO:0004672|GO:0005524|GO:0006468
Mmel_00013304-RA	badc243078ff6ce58f1cd4ac6f6dab6d	1692	Pfam	PF17517	IgGFc binding protein	136	424	5.8e-59	T	31-10-2019	IPR035234	IgGFc-binding protein, N-terminal
Mmel_00013304-RA	badc243078ff6ce58f1cd4ac6f6dab6d	1692	Pfam	PF08742	C8 domain	928	996	1.3e-19	T	31-10-2019	IPR014853	Uncharacterised domain, cysteine-rich
Mmel_00013304-RA	badc243078ff6ce58f1cd4ac6f6dab6d	1692	Pfam	PF08742	C8 domain	1318	1385	1.3e-20	T	31-10-2019	IPR014853	Uncharacterised domain, cysteine-rich
Mmel_00013304-RA	badc243078ff6ce58f1cd4ac6f6dab6d	1692	Pfam	PF01826	Trypsin Inhibitor like cysteine rich domain	1000	1054	3.7e-12	T	31-10-2019	IPR002919	Trypsin Inhibitor-like, cysteine rich domain
Mmel_00013304-RA	badc243078ff6ce58f1cd4ac6f6dab6d	1692	Pfam	PF01826	Trypsin Inhibitor like cysteine rich domain	1389	1442	2.3e-10	T	31-10-2019	IPR002919	Trypsin Inhibitor-like, cysteine rich domain
Mmel_00013304-RA	badc243078ff6ce58f1cd4ac6f6dab6d	1692	Pfam	PF12714	TILa domain	1055	1108	2e-08	T	31-10-2019	IPR025615	TILa domain
Mmel_00013304-RA	badc243078ff6ce58f1cd4ac6f6dab6d	1692	Pfam	PF12714	TILa domain	1443	1497	5.5e-09	T	31-10-2019	IPR025615	TILa domain
Mmel_00013304-RA	badc243078ff6ce58f1cd4ac6f6dab6d	1692	Pfam	PF12714	TILa domain	671	725	3.2e-07	T	31-10-2019	IPR025615	TILa domain
Mmel_00013304-RA	badc243078ff6ce58f1cd4ac6f6dab6d	1692	Pfam	PF00094	von Willebrand factor type D domain	1117	1270	3.6e-30	T	31-10-2019	IPR001846	von Willebrand factor, type D domain
Mmel_00013304-RA	badc243078ff6ce58f1cd4ac6f6dab6d	1692	Pfam	PF00094	von Willebrand factor type D domain	1503	1654	8.1e-13	T	31-10-2019	IPR001846	von Willebrand factor, type D domain
Mmel_00013304-RA	badc243078ff6ce58f1cd4ac6f6dab6d	1692	Pfam	PF00094	von Willebrand factor type D domain	732	883	1.8e-32	T	31-10-2019	IPR001846	von Willebrand factor, type D domain
Mmel_00013304-RA	badc243078ff6ce58f1cd4ac6f6dab6d	1692	Pfam	PF00094	von Willebrand factor type D domain	471	622	6.3e-26	T	31-10-2019	IPR001846	von Willebrand factor, type D domain
Mmel_00009949-RA	bc631cc8338091aa7fcf579b6655274d	284	Pfam	PF01410	Fibrillar collagen C-terminal domain	217	284	2.9e-11	T	31-10-2019	IPR000885	Fibrillar collagen, C-terminal	GO:0005201	Reactome: R-HSA-1442490|Reactome: R-HSA-1650814|Reactome: R-HSA-2022090|Reactome: R-HSA-3000171|Reactome: R-HSA-8874081|Reactome: R-HSA-8948216
Mmel_00009949-RA	bc631cc8338091aa7fcf579b6655274d	284	Pfam	PF01410	Fibrillar collagen C-terminal domain	133	208	1.8e-27	T	31-10-2019	IPR000885	Fibrillar collagen, C-terminal	GO:0005201	Reactome: R-HSA-1442490|Reactome: R-HSA-1650814|Reactome: R-HSA-2022090|Reactome: R-HSA-3000171|Reactome: R-HSA-8874081|Reactome: R-HSA-8948216
Mmel_00009949-RA	bc631cc8338091aa7fcf579b6655274d	284	Pfam	PF01391	Collagen triple helix repeat (20 copies)	40	94	1.1e-08	T	31-10-2019	IPR008160	Collagen triple helix repeat
Mmel_00009949-RA	bc631cc8338091aa7fcf579b6655274d	284	Pfam	PF01391	Collagen triple helix repeat (20 copies)	3	52	1e-07	T	31-10-2019	IPR008160	Collagen triple helix repeat
Mmel_00000646-RA	f345075be217389156467a5d1777a908	302	Pfam	PF00303	Thymidylate synthase	20	302	1.1e-120	T	31-10-2019	IPR023451	Thymidylate synthase/dCMP hydroxymethylase domain		KEGG: 00240+2.1.1.45|KEGG: 00670+2.1.1.45|MetaCyc: PWY-3841|MetaCyc: PWY-7184|MetaCyc: PWY-7187|MetaCyc: PWY-7198|MetaCyc: PWY-7199|MetaCyc: PWY-7210|Reactome: R-HSA-499943|Reactome: R-HSA-539107
Mmel_00012261-RA	c8ca321a08a0c7e3b864b5c5603b7213	1351	Pfam	PF00008	EGF-like domain	644	670	9.7e-06	T	31-10-2019	IPR000742	EGF-like domain
Mmel_00012261-RA	c8ca321a08a0c7e3b864b5c5603b7213	1351	Pfam	PF00008	EGF-like domain	269	304	8.3e-06	T	31-10-2019	IPR000742	EGF-like domain
Mmel_00012261-RA	c8ca321a08a0c7e3b864b5c5603b7213	1351	Pfam	PF00008	EGF-like domain	722	752	2e-08	T	31-10-2019	IPR000742	EGF-like domain
Mmel_00012261-RA	c8ca321a08a0c7e3b864b5c5603b7213	1351	Pfam	PF00008	EGF-like domain	760	790	1.8e-06	T	31-10-2019	IPR000742	EGF-like domain
Mmel_00012261-RA	c8ca321a08a0c7e3b864b5c5603b7213	1351	Pfam	PF00008	EGF-like domain	382	411	9.9e-05	T	31-10-2019	IPR000742	EGF-like domain
Mmel_00012261-RA	c8ca321a08a0c7e3b864b5c5603b7213	1351	Pfam	PF00008	EGF-like domain	961	989	1e-05	T	31-10-2019	IPR000742	EGF-like domain
Mmel_00012261-RA	c8ca321a08a0c7e3b864b5c5603b7213	1351	Pfam	PF00008	EGF-like domain	856	885	7.3e-07	T	31-10-2019	IPR000742	EGF-like domain
Mmel_00012261-RA	c8ca321a08a0c7e3b864b5c5603b7213	1351	Pfam	PF00008	EGF-like domain	420	450	1.1e-06	T	31-10-2019	IPR000742	EGF-like domain
Mmel_00012261-RA	c8ca321a08a0c7e3b864b5c5603b7213	1351	Pfam	PF00008	EGF-like domain	1318	1347	1.9e-07	T	31-10-2019	IPR000742	EGF-like domain
Mmel_00012261-RA	c8ca321a08a0c7e3b864b5c5603b7213	1351	Pfam	PF00008	EGF-like domain	501	530	8.4e-08	T	31-10-2019	IPR000742	EGF-like domain
Mmel_00012261-RA	c8ca321a08a0c7e3b864b5c5603b7213	1351	Pfam	PF07645	Calcium-binding EGF domain	919	954	6e-06	T	31-10-2019	IPR001881	EGF-like calcium-binding domain	GO:0005509
Mmel_00012261-RA	c8ca321a08a0c7e3b864b5c5603b7213	1351	Pfam	PF06119	Nidogen-like	166	253	9.4e-27	T	31-10-2019	IPR003886	NIDO domain	GO:0007160
Mmel_00012261-RA	c8ca321a08a0c7e3b864b5c5603b7213	1351	Pfam	PF00041	Fibronectin type III domain	1092	1173	3.7e-08	T	31-10-2019	IPR003961	Fibronectin type III	GO:0005515
Mmel_00012261-RA	c8ca321a08a0c7e3b864b5c5603b7213	1351	Pfam	PF12661	Human growth factor-like EGF	542	562	0.0073	T	31-10-2019	IPR013032	EGF-like, conserved site
Mmel_00012203-RA	66b62897e0a8723d4938578f4e9742c2	964	Pfam	PF00564	PB1 domain	1	49	1.2e-07	T	31-10-2019	IPR000270	PB1 domain	GO:0005515
Mmel_00012203-RA	66b62897e0a8723d4938578f4e9742c2	964	Pfam	PF16158	Ig-like domain from next to BRCA1 gene	351	450	1e-30	T	31-10-2019	IPR032350	Next to BRCA1, central domain
Mmel_00012203-RA	66b62897e0a8723d4938578f4e9742c2	964	Pfam	PF00569	Zinc finger, ZZ type	190	224	1.1e-05	T	31-10-2019	IPR000433	Zinc finger, ZZ-type	GO:0008270
Mmel_00006656-RA	deddd68417bf72f5e1e0813af6db56fb	341	Pfam	PF00001	7 transmembrane receptor (rhodopsin family)	84	255	1.7e-31	T	31-10-2019	IPR000276	G protein-coupled receptor, rhodopsin-like	GO:0004930|GO:0007186|GO:0016021
Mmel_00010836-RA	eb4d3fd4d1cf37352cd9fceb5244dd65	505	Pfam	PF13639	Ring finger domain	177	218	1.2e-08	T	31-10-2019	IPR001841	Zinc finger, RING-type
Mmel_00010836-RA	eb4d3fd4d1cf37352cd9fceb5244dd65	505	Pfam	PF07576	BRCA1-associated protein 2	69	164	5.1e-36	T	31-10-2019	IPR011422	BRCA1-associated 2		Reactome: R-HSA-5673000|Reactome: R-HSA-5675221|Reactome: R-HSA-6802946|Reactome: R-HSA-6802949|Reactome: R-HSA-6802955
Mmel_00010836-RA	eb4d3fd4d1cf37352cd9fceb5244dd65	505	Pfam	PF02148	Zn-finger in ubiquitin-hydrolases and other protein	231	290	7.7e-21	T	31-10-2019	IPR001607	Zinc finger, UBP-type	GO:0008270
Mmel_00014172-RA	1575bf44f7cb9454a22c419d048d654e	435	Pfam	PF00612	IQ calmodulin-binding motif	402	421	9e-06	T	31-10-2019	IPR000048	IQ motif, EF-hand binding site	GO:0005515
Mmel_00008429-RA	8fd64ed6c19416988987c970f6104b1b	300	Pfam	PF13895	Immunoglobulin domain	58	144	1e-08	T	31-10-2019	IPR007110	Immunoglobulin-like domain
Mmel_00008429-RA	8fd64ed6c19416988987c970f6104b1b	300	Pfam	PF13927	Immunoglobulin domain	153	226	1.1e-09	T	31-10-2019
Mmel_00009348-RA	392f5dafb1a66c0cab22ac596606cde4	344	Pfam	PF08240	Alcohol dehydrogenase GroES-like domain	29	138	5.5e-24	T	31-10-2019	IPR013154	Alcohol dehydrogenase, N-terminal	GO:0055114
Mmel_00009348-RA	392f5dafb1a66c0cab22ac596606cde4	344	Pfam	PF00107	Zinc-binding dehydrogenase	183	299	1.2e-16	T	31-10-2019	IPR013149	Alcohol dehydrogenase, C-terminal	GO:0055114
Mmel_00014065-RA	0dbb5449c3617510b56a3fb1705119ce	671	Pfam	PF00654	Voltage gated chloride channel	209	563	6.6e-70	T	31-10-2019	IPR001807	Chloride channel, voltage gated	GO:0005247|GO:0006821|GO:0016020|GO:0055085	Reactome: R-HSA-2672351
Mmel_00014065-RA	0dbb5449c3617510b56a3fb1705119ce	671	Pfam	PF00571	CBS domain	611	658	8.3e-07	T	31-10-2019	IPR000644	CBS domain
Mmel_00003139-RA	53f61e81bc3f7ec1e723e59d6ea57779	417	Pfam	PF16366	Cytoplasmic polyadenylation element-binding protein ZZ domain	341	403	7.6e-21	T	31-10-2019	IPR032296	Cytoplasmic polyadenylation element-binding protein, ZZ domain
Mmel_00003139-RA	53f61e81bc3f7ec1e723e59d6ea57779	417	Pfam	PF16367	RNA recognition motif	159	248	5.4e-35	T	31-10-2019	IPR000504	RNA recognition motif domain	GO:0003676
Mmel_00000153-RA	c60b6356db85782026ac80ab7d53041e	184	Pfam	PF00071	Ras family	5	166	2.3e-57	T	31-10-2019	IPR001806	Small GTPase superfamily	GO:0003924|GO:0005525
Mmel_00014742-RA	6180ee754dd2fd857c922dfed706e860	92	Pfam	PF00096	Zinc finger, C2H2 type	14	29	0.0049	T	31-10-2019
Mmel_00000057-RA	e48079acfd6e3779c7ec56d7c53d0821	430	Pfam	PF00412	LIM domain	309	365	1.1e-12	T	31-10-2019	IPR001781	Zinc finger, LIM-type
Mmel_00000057-RA	e48079acfd6e3779c7ec56d7c53d0821	430	Pfam	PF00412	LIM domain	244	304	6.2e-12	T	31-10-2019	IPR001781	Zinc finger, LIM-type
Mmel_00000057-RA	e48079acfd6e3779c7ec56d7c53d0821	430	Pfam	PF00412	LIM domain	369	421	3.6e-05	T	31-10-2019	IPR001781	Zinc finger, LIM-type
Mmel_00000057-RA	e48079acfd6e3779c7ec56d7c53d0821	430	Pfam	PF06297	PET Domain	117	201	3.6e-40	T	31-10-2019	IPR010442	PET domain	GO:0008270
Mmel_00006896-RA	b923d1a3fe08cede55d925dcaef9d9f2	306	Pfam	PF06401	Alpha-2-macroglobulin RAP, C-terminal domain	94	306	1.3e-71	T	31-10-2019	IPR010483	Alpha-2-macroglobulin RAP, C-terminal	GO:0005783|GO:0008201|GO:0050750
Mmel_00006896-RA	b923d1a3fe08cede55d925dcaef9d9f2	306	Pfam	PF06400	Alpha-2-macroglobulin RAP, N-terminal domain	13	76	6.9e-25	T	31-10-2019	IPR009066	Alpha-2-macroglobulin receptor-associated protein, domain 1
Mmel_00004046-RA	caa4380b0beae658ce5d091b8debd603	163	Pfam	PF03931	Skp1 family, tetramerisation domain	2	67	4.5e-30	T	31-10-2019	IPR016073	SKP1 component, POZ domain	GO:0006511	Reactome: R-HSA-8951664|Reactome: R-HSA-983168
Mmel_00004046-RA	caa4380b0beae658ce5d091b8debd603	163	Pfam	PF01466	Skp1 family, dimerisation domain	113	160	1.3e-30	T	31-10-2019	IPR016072	SKP1 component, dimerisation	GO:0006511	Reactome: R-HSA-1169091|Reactome: R-HSA-1170546|Reactome: R-HSA-174113|Reactome: R-HSA-180534|Reactome: R-HSA-187577|Reactome: R-HSA-195253|Reactome: R-HSA-202424|Reactome: R-HSA-2122947|Reactome: R-HSA-2565942|Reactome: R-HSA-2644606|Reactome: R-HSA-2644607|Reactome: R-HSA-2871837|Reactome: R-HSA-2894862|Reactome: R-HSA-400253|Reactome: R-HSA-5607761|Reactome: R-HSA-5607764|Reactome: R-HSA-56107…
Mmel_00011871-RA	6281ebeec529239254b765fe22176221	530	Pfam	PF02770	Acyl-CoA dehydrogenase, middle domain	129	229	4e-27	T	31-10-2019	IPR006091	Acyl-CoA oxidase/dehydrogenase, central domain	GO:0016627|GO:0055114
Mmel_00011871-RA	6281ebeec529239254b765fe22176221	530	Pfam	PF00441	Acyl-CoA dehydrogenase, C-terminal domain	242	355	2.8e-18	T	31-10-2019	IPR009075	Acyl-CoA dehydrogenase/oxidase C-terminal	GO:0016627|GO:0055114
Mmel_00011871-RA	6281ebeec529239254b765fe22176221	530	Pfam	PF02771	Acyl-CoA dehydrogenase, N-terminal domain	20	125	3.8e-24	T	31-10-2019	IPR013786	Acyl-CoA dehydrogenase/oxidase, N-terminal	GO:0016627|GO:0050660|GO:0055114
Mmel_00008027-RA	dd3902e401438c551b1f2cf0670d2739	314	Pfam	PF01391	Collagen triple helix repeat (20 copies)	122	179	6.4e-10	T	31-10-2019	IPR008160	Collagen triple helix repeat
Mmel_00008027-RA	dd3902e401438c551b1f2cf0670d2739	314	Pfam	PF00386	C1q domain	187	310	8.7e-33	T	31-10-2019	IPR001073	C1q domain
Mmel_00003761-RA	d51df108464422dd2689e6c9cabff6fc	383	Pfam	PF13637	Ankyrin repeats (many copies)	105	156	6.2e-10	T	31-10-2019
Mmel_00003761-RA	d51df108464422dd2689e6c9cabff6fc	383	Pfam	PF12796	Ankyrin repeats (3 copies)	11	101	1.1e-15	T	31-10-2019	IPR020683	Ankyrin repeat-containing domain
Mmel_00009146-RA	cf8b3475845e6673cdb8888bf45891d9	444	Pfam	PF00169	PH domain	280	382	2.6e-10	T	31-10-2019	IPR001849	Pleckstrin homology domain
Mmel_00009146-RA	cf8b3475845e6673cdb8888bf45891d9	444	Pfam	PF00018	SH3 domain	14	58	4.3e-10	T	31-10-2019	IPR001452	SH3 domain	GO:0005515
Mmel_00009146-RA	cf8b3475845e6673cdb8888bf45891d9	444	Pfam	PF00621	RhoGEF domain	103	238	5.1e-29	T	31-10-2019	IPR000219	Dbl homology (DH) domain	GO:0005089|GO:0035023
Mmel_00000623-RA	f6f08a818a0ce48de5080e8cc9eed8ab	251	Pfam	PF13637	Ankyrin repeats (many copies)	97	147	8.1e-07	T	31-10-2019
Mmel_00000623-RA	f6f08a818a0ce48de5080e8cc9eed8ab	251	Pfam	PF12796	Ankyrin repeats (3 copies)	1	90	7.7e-18	T	31-10-2019	IPR020683	Ankyrin repeat-containing domain
Mmel_00000623-RA	f6f08a818a0ce48de5080e8cc9eed8ab	251	Pfam	PF12796	Ankyrin repeats (3 copies)	148	223	2.4e-11	T	31-10-2019	IPR020683	Ankyrin repeat-containing domain
Mmel_00011906-RA	00e659cb4dca38da58be2716df0eef43	678	Pfam	PF03388	Legume-like lectin family	36	259	1.3e-89	T	31-10-2019	IPR005052	Legume-like lectin	GO:0016020	Reactome: R-HSA-204005|Reactome: R-HSA-5694530
Mmel_00011906-RA	00e659cb4dca38da58be2716df0eef43	678	Pfam	PF05835	Synaphin protein	520	659	2.3e-45	T	31-10-2019	IPR008849	Synaphin	GO:0006836|GO:0019905
Mmel_00010097-RA	8fe62c1fe69791c2d7a0971633ed6efb	327	Pfam	PF00520	Ion transport protein	43	243	5.1e-19	T	31-10-2019	IPR005821	Ion transport domain	GO:0005216|GO:0006811|GO:0016020|GO:0055085
Mmel_00008524-RA	b435131cd9a16935e2e7430169479ff3	186	Pfam	PF04857	CAF1 family ribonuclease	41	132	4.7e-10	T	31-10-2019	IPR006941	Ribonuclease CAF1
Mmel_00003178-RA	6866b399eaeb2e76166843caae69b841	471	Pfam	PF13180	PDZ domain	384	464	3.1e-10	T	31-10-2019	IPR001478	PDZ domain	GO:0005515
Mmel_00003178-RA	6866b399eaeb2e76166843caae69b841	471	Pfam	PF07648	Kazal-type serine protease inhibitor domain	94	120	7.5e-06	T	31-10-2019	IPR002350	Kazal domain	GO:0005515
Mmel_00003178-RA	6866b399eaeb2e76166843caae69b841	471	Pfam	PF00219	Insulin-like growth factor binding protein	30	81	4.8e-09	T	31-10-2019	IPR000867	Insulin-like growth factor-binding protein, IGFBP	GO:0001558|GO:0005520|GO:0005576
Mmel_00003178-RA	6866b399eaeb2e76166843caae69b841	471	Pfam	PF13365	Trypsin-like peptidase domain	193	337	3.5e-29	T	31-10-2019
Mmel_00005983-RA	9a4f7b342f6a108f2c9a46bf759efa74	983	Pfam	PF00787	PX domain	83	132	1.1e-07	T	31-10-2019	IPR001683	Phox homologous domain	GO:0035091
Mmel_00005983-RA	9a4f7b342f6a108f2c9a46bf759efa74	983	Pfam	PF00169	PH domain	176	281	2.6e-08	T	31-10-2019	IPR001849	Pleckstrin homology domain
Mmel_00005983-RA	9a4f7b342f6a108f2c9a46bf759efa74	983	Pfam	PF13091	PLD-like domain	685	854	2.5e-09	T	31-10-2019	IPR025202	Phospholipase D-like domain		Reactome: R-HSA-1483148|Reactome: R-HSA-1483166
Mmel_00012258-RA	ea91dc136dc4604624bc077899fc8779	1255	Pfam	PF00013	KH domain	153	212	1.2e-14	T	31-10-2019	IPR004088	K Homology domain, type 1	GO:0003723
Mmel_00012258-RA	ea91dc136dc4604624bc077899fc8779	1255	Pfam	PF00013	KH domain	655	716	5.6e-16	T	31-10-2019	IPR004088	K Homology domain, type 1	GO:0003723
Mmel_00012258-RA	ea91dc136dc4604624bc077899fc8779	1255	Pfam	PF00013	KH domain	583	643	4.7e-16	T	31-10-2019	IPR004088	K Homology domain, type 1	GO:0003723
Mmel_00012258-RA	ea91dc136dc4604624bc077899fc8779	1255	Pfam	PF00013	KH domain	875	967	4.8e-11	T	31-10-2019	IPR004088	K Homology domain, type 1	GO:0003723
Mmel_00012258-RA	ea91dc136dc4604624bc077899fc8779	1255	Pfam	PF00013	KH domain	973	1032	3.2e-11	T	31-10-2019	IPR004088	K Homology domain, type 1	GO:0003723
Mmel_00012258-RA	ea91dc136dc4604624bc077899fc8779	1255	Pfam	PF00013	KH domain	1054	1104	8.3e-09	T	31-10-2019	IPR004088	K Homology domain, type 1	GO:0003723
Mmel_00012258-RA	ea91dc136dc4604624bc077899fc8779	1255	Pfam	PF00013	KH domain	1118	1178	1e-12	T	31-10-2019	IPR004088	K Homology domain, type 1	GO:0003723
Mmel_00012258-RA	ea91dc136dc4604624bc077899fc8779	1255	Pfam	PF00013	KH domain	298	356	4.3e-11	T	31-10-2019	IPR004088	K Homology domain, type 1	GO:0003723
Mmel_00012258-RA	ea91dc136dc4604624bc077899fc8779	1255	Pfam	PF00013	KH domain	438	497	5.5e-14	T	31-10-2019	IPR004088	K Homology domain, type 1	GO:0003723
Mmel_00012258-RA	ea91dc136dc4604624bc077899fc8779	1255	Pfam	PF00013	KH domain	224	284	4.4e-08	T	31-10-2019	IPR004088	K Homology domain, type 1	GO:0003723
Mmel_00012258-RA	ea91dc136dc4604624bc077899fc8779	1255	Pfam	PF00013	KH domain	734	790	1.1e-14	T	31-10-2019	IPR004088	K Homology domain, type 1	GO:0003723
Mmel_00012258-RA	ea91dc136dc4604624bc077899fc8779	1255	Pfam	PF00013	KH domain	367	424	6.6e-11	T	31-10-2019	IPR004088	K Homology domain, type 1	GO:0003723
Mmel_00012258-RA	ea91dc136dc4604624bc077899fc8779	1255	Pfam	PF00013	KH domain	803	864	2.9e-07	T	31-10-2019	IPR004088	K Homology domain, type 1	GO:0003723
Mmel_00012258-RA	ea91dc136dc4604624bc077899fc8779	1255	Pfam	PF00013	KH domain	510	570	1e-11	T	31-10-2019	IPR004088	K Homology domain, type 1	GO:0003723
Mmel_00014798-RA	23d2f40e30309ddaef4a32de305cae32	110	Pfam	PF13520	Amino acid permease	2	75	8.1e-07	T	31-10-2019	IPR002293	Amino acid/polyamine transporter I	GO:0016020|GO:0022857|GO:0055085
Mmel_00000402-RA	ca06fa0d392d344166e889519d1718e5	115	Pfam	PF03604	DNA directed RNA polymerase, 7 kDa subunit	67	98	1.3e-16	T	31-10-2019	IPR006591	RNA polymerase archaeal subunit P/eukaryotic subunit RPABC4	GO:0003677|GO:0003899|GO:0006351	KEGG: 00230+2.7.7.6|KEGG: 00240+2.7.7.6|Reactome: R-HSA-112382|Reactome: R-HSA-113418|Reactome: R-HSA-167152|Reactome: R-HSA-167158|Reactome: R-HSA-167160|Reactome: R-HSA-167161|Reactome: R-HSA-167162|Reactome: R-HSA-167172|Reactome: R-HSA-167200|Reactome: R-HSA-167238|Reactome: R-HSA-167242|Reactome: R-HSA-167243|Reactome: R-HSA-167246|Reactome: R-HSA-167287|Reactome: R-HSA-167290|Reactome: R-HS…
Mmel_00000605-RA	04c6f05ae912e7ad8ba49ea7807e865a	1072	Pfam	PF00028	Cadherin domain	175	270	2.6e-16	T	31-10-2019	IPR002126	Cadherin	GO:0005509|GO:0007156|GO:0016020
Mmel_00000605-RA	04c6f05ae912e7ad8ba49ea7807e865a	1072	Pfam	PF00028	Cadherin domain	403	494	1.6e-12	T	31-10-2019	IPR002126	Cadherin	GO:0005509|GO:0007156|GO:0016020
Mmel_00000605-RA	04c6f05ae912e7ad8ba49ea7807e865a	1072	Pfam	PF00028	Cadherin domain	285	365	1.8e-10	T	31-10-2019	IPR002126	Cadherin	GO:0005509|GO:0007156|GO:0016020
Mmel_00000605-RA	04c6f05ae912e7ad8ba49ea7807e865a	1072	Pfam	PF01049	Cadherin cytoplasmic region	740	803	6.7e-06	T	31-10-2019	IPR000233	Cadherin, cytoplasmic domain	GO:0005509|GO:0007156
Mmel_00012994-RA	3e0f5c9933d7046e57b5521c1afbc8d9	420	Pfam	PF09507	DNA polymerase subunit Cdc27	1	420	1.1e-110	T	31-10-2019	IPR019038	DNA polymerase subunit Cdc27	GO:0005634|GO:0006260	Reactome: R-HSA-110314|Reactome: R-HSA-174411|Reactome: R-HSA-174414|Reactome: R-HSA-174417|Reactome: R-HSA-174437|Reactome: R-HSA-5358565|Reactome: R-HSA-5358606|Reactome: R-HSA-5651801|Reactome: R-HSA-5656169|Reactome: R-HSA-5685942|Reactome: R-HSA-5696397|Reactome: R-HSA-5696400|Reactome: R-HSA-6782135|Reactome: R-HSA-6782210|Reactome: R-HSA-69091|Reactome: R-HSA-69166|Reactome: R-HSA-69183
Mmel_00012380-RA	27c4e8367b45bca7c749dca1a9dc4e88	341	Pfam	PF02201	SWIB/MDM2 domain	120	189	1.2e-24	T	31-10-2019	IPR003121	SWIB/MDM2 domain	GO:0005515
Mmel_00004142-RA	7bca522c8d188adf0825a1f80edd0142	430	Pfam	PF01582	TIR domain	149	307	4.1e-31	T	31-10-2019	IPR000157	Toll/interleukin-1 receptor homology (TIR) domain	GO:0005515|GO:0007165
Mmel_00013299-RA	7f977104adbdf7e327f18c13748f936c	723	Pfam	PF17217	UPA domain	547	602	4.1e-27	T	31-10-2019	IPR033772	UPA domain		Reactome: R-HSA-418886
Mmel_00013299-RA	7f977104adbdf7e327f18c13748f936c	723	Pfam	PF17217	UPA domain	513	548	8.3e-15	T	31-10-2019	IPR033772	UPA domain		Reactome: R-HSA-418886
Mmel_00013299-RA	7f977104adbdf7e327f18c13748f936c	723	Pfam	PF07679	Immunoglobulin I-set domain	218	278	3.7e-06	T	31-10-2019	IPR013098	Immunoglobulin I-set
Mmel_00013299-RA	7f977104adbdf7e327f18c13748f936c	723	Pfam	PF00531	Death domain	641	714	7.6e-15	T	31-10-2019	IPR000488	Death domain	GO:0005515|GO:0007165
Mmel_00013299-RA	7f977104adbdf7e327f18c13748f936c	723	Pfam	PF00791	ZU5 domain	397	479	7.2e-25	T	31-10-2019	IPR000906	ZU5 domain
Mmel_00003685-RA	698a712829021243619347cbfac29fcd	311	Pfam	PF13414	TPR repeat	99	139	3.6e-09	T	31-10-2019
Mmel_00003685-RA	698a712829021243619347cbfac29fcd	311	Pfam	PF00515	Tetratricopeptide repeat	161	193	4.7e-09	T	31-10-2019	IPR001440	Tetratricopeptide repeat 1	GO:0005515
Mmel_00003685-RA	698a712829021243619347cbfac29fcd	311	Pfam	PF16546	Homodimerisation domain of SGTA	11	70	2.5e-16	T	31-10-2019	IPR032374	SGTA, homodimerisation domain
Mmel_00005545-RA	acf62741852d468f640d4940588980fc	435	Pfam	PF03619	Organic solute transporter Ostalpha	75	347	1.4e-93	T	31-10-2019	IPR005178	Organic solute transporter subunit alpha/Transmembrane protein 184
Mmel_00007643-RA	5afb804466c2170c1283963f9899d3d5	384	Pfam	PF00063	Myosin head (motor domain)	249	376	3.1e-26	T	31-10-2019	IPR001609	Myosin head, motor domain	GO:0003774|GO:0005524|GO:0016459
Mmel_00007643-RA	5afb804466c2170c1283963f9899d3d5	384	Pfam	PF00063	Myosin head (motor domain)	48	227	3.7e-73	T	31-10-2019	IPR001609	Myosin head, motor domain	GO:0003774|GO:0005524|GO:0016459
Mmel_00009450-RA	7a614d08d48e19ed9c2b88045a9db931	149	Pfam	PF02966	Mitosis protein DIM1	4	136	6.3e-55	T	31-10-2019	IPR004123	Dim1 family	GO:0000398|GO:0046540
Mmel_00010646-RA	effc5601dfc956bcacc2c6782ab21683	479	Pfam	PF06421	GTP-binding protein LepA C-terminus	384	452	3.4e-26	T	31-10-2019	IPR013842	GTP-binding protein LepA, C-terminal
Mmel_00010646-RA	effc5601dfc956bcacc2c6782ab21683	479	Pfam	PF00679	Elongation factor G C-terminus	295	381	4.4e-20	T	31-10-2019	IPR000640	Elongation factor EFG, domain V-like
Mmel_00010646-RA	effc5601dfc956bcacc2c6782ab21683	479	Pfam	PF00009	Elongation factor Tu GTP binding domain	8	84	6.8e-24	T	31-10-2019	IPR000795	Transcription factor, GTP-binding domain	GO:0003924|GO:0005525
Mmel_00003755-RA	0239eab8f9aab0d85e7de3c6351ef849	555	Pfam	PF15920	N-terminal of Junction-mediating and WASP homolog-associated	4	36	1.6e-09	T	31-10-2019	IPR031808	JMY/WHAMM, N-terminal
Mmel_00003755-RA	0239eab8f9aab0d85e7de3c6351ef849	555	Pfam	PF15871	Junction-mediating and -regulatory protein	32	336	4.1e-141	T	31-10-2019	IPR031738	JMY/WHAMM, middle domain
Mmel_00007314-RA	990759da2f6e88a4949543cf7f6b03cd	230	Pfam	PF02737	3-hydroxyacyl-CoA dehydrogenase, NAD binding domain	7	130	6.2e-46	T	31-10-2019	IPR006176	3-hydroxyacyl-CoA dehydrogenase, NAD binding	GO:0003857|GO:0006631|GO:0016491|GO:0055114	KEGG: 00062+4.2.1.17+1.1.1.35|KEGG: 00071+4.2.1.17+1.1.1.35|KEGG: 00120+1.1.1.35|KEGG: 00280+4.2.1.17+1.1.1.35|KEGG: 00281+4.2.1.17+1.1.1.35|KEGG: 00310+4.2.1.17+1.1.1.35|KEGG: 00360+4.2.1.17|KEGG: 00362+4.2.1.17+1.1.1.35|KEGG: 00380+4.2.1.17+1.1.1.35|KEGG: 00410+4.2.1.17|KEGG: 00592+4.2.1.17|KEGG: 00623+1.1.1.35|KEGG: 00627+4.2.1.17|KEGG: 00640+4.2.1.17|KEGG: 00650+4.2.1.17+1.1.1.35|KEGG: 00720+…
Mmel_00007314-RA	990759da2f6e88a4949543cf7f6b03cd	230	Pfam	PF00725	3-hydroxyacyl-CoA dehydrogenase, C-terminal domain	132	229	2.6e-35	T	31-10-2019	IPR006108	3-hydroxyacyl-CoA dehydrogenase, C-terminal	GO:0003857|GO:0006631|GO:0016491|GO:0055114	KEGG: 00062+4.2.1.17+1.1.1.35|KEGG: 00071+4.2.1.17+1.1.1.35|KEGG: 00120+1.1.1.35|KEGG: 00280+4.2.1.17+1.1.1.35|KEGG: 00281+4.2.1.17+1.1.1.35|KEGG: 00310+4.2.1.17+1.1.1.35|KEGG: 00360+4.2.1.17|KEGG: 00362+4.2.1.17+1.1.1.35|KEGG: 00380+4.2.1.17+1.1.1.35|KEGG: 00410+4.2.1.17|KEGG: 00592+4.2.1.17|KEGG: 00623+1.1.1.35|KEGG: 00627+4.2.1.17|KEGG: 00640+4.2.1.17|KEGG: 00650+4.2.1.17+1.1.1.35|KEGG: 00720+…
Mmel_00011785-RA	2d2af4d0a48edd7111dd9a94cc3dbfa9	659	Pfam	PF16420	Ubiquitin-like modifier-activating enzyme ATG7 N-terminus	19	329	4.9e-103	T	31-10-2019	IPR032197	Ubiquitin-like modifier-activating enzyme Atg7, N-terminal		Reactome: R-HSA-1632852|Reactome: R-HSA-6798695|Reactome: R-HSA-6802952|Reactome: R-HSA-983168
Mmel_00011785-RA	2d2af4d0a48edd7111dd9a94cc3dbfa9	659	Pfam	PF00899	ThiF family	351	654	3e-57	T	31-10-2019	IPR000594	THIF-type NAD/FAD binding fold	GO:0008641
Mmel_00000313-RA	4bcd0772f1926fec38dfff0d631967f7	240	Pfam	PF00059	Lectin C-type domain	129	235	1.4e-18	T	31-10-2019	IPR001304	C-type lectin-like
Mmel_00000313-RA	4bcd0772f1926fec38dfff0d631967f7	240	Pfam	PF01391	Collagen triple helix repeat (20 copies)	25	80	6.4e-08	T	31-10-2019	IPR008160	Collagen triple helix repeat
Mmel_00000313-RA	4bcd0772f1926fec38dfff0d631967f7	240	Pfam	PF01391	Collagen triple helix repeat (20 copies)	13	57	6.1e-07	T	31-10-2019	IPR008160	Collagen triple helix repeat
Mmel_00014420-RA	c808c60a6b84752f85b8bbe3db4c7a3c	595	Pfam	PF09457	FIP domain	538	584	2.1e-15	T	31-10-2019	IPR019018	Rab-binding domain FIP-RBD
Mmel_00006899-RA	999885da7f158c8d38531ecea17d9e7b	578	Pfam	PF13620	Carboxypeptidase regulatory-like domain	431	507	8.7e-14	T	31-10-2019
Mmel_00006899-RA	999885da7f158c8d38531ecea17d9e7b	578	Pfam	PF01392	Fz domain	18	122	1.6e-18	T	31-10-2019	IPR020067	Frizzled domain	GO:0005515
Mmel_00006899-RA	999885da7f158c8d38531ecea17d9e7b	578	Pfam	PF00246	Zinc carboxypeptidase	149	430	6.2e-72	T	31-10-2019	IPR000834	Peptidase M14, carboxypeptidase A	GO:0004181|GO:0006508|GO:0008270
Mmel_00006294-RA	c23346bec559b5348361afe4dea8cad7	570	Pfam	PF00169	PH domain	337	434	1.4e-16	T	31-10-2019	IPR001849	Pleckstrin homology domain
Mmel_00006294-RA	c23346bec559b5348361afe4dea8cad7	570	Pfam	PF00168	C2 domain	10	54	1.5e-05	T	31-10-2019	IPR000008	C2 domain
Mmel_00006294-RA	c23346bec559b5348361afe4dea8cad7	570	Pfam	PF00779	BTK motif	444	471	1.1e-12	T	31-10-2019	IPR001562	Zinc finger, Btk motif	GO:0035556
Mmel_00006294-RA	c23346bec559b5348361afe4dea8cad7	570	Pfam	PF00616	GTPase-activator protein for Ras-like GTPase	150	314	4.6e-16	T	31-10-2019	IPR001936	Ras GTPase-activating domain	GO:0043087
Mmel_00001695-RA	e4339ac333b37896f95af4117db6ca95	3997	Pfam	PF12781	ATP-binding dynein motor region D5	3227	3443	8.3e-75	T	31-10-2019	IPR035706	Dynein heavy chain, ATP-binding dynein motor region D5
Mmel_00001695-RA	e4339ac333b37896f95af4117db6ca95	3997	Pfam	PF03028	Dynein heavy chain and region D6 of dynein motor	3590	3983	4.4e-109	T	31-10-2019	IPR004273	Dynein heavy chain domain	GO:0003777|GO:0007018|GO:0030286
Mmel_00001695-RA	e4339ac333b37896f95af4117db6ca95	3997	Pfam	PF08385	Dynein heavy chain, N-terminal region 1	148	620	1.1e-31	T	31-10-2019	IPR013594	Dynein heavy chain, domain-1
Mmel_00001695-RA	e4339ac333b37896f95af4117db6ca95	3997	Pfam	PF12775	P-loop containing dynein motor region D3	2271	2492	8.2e-18	T	31-10-2019
Mmel_00001695-RA	e4339ac333b37896f95af4117db6ca95	3997	Pfam	PF07728	AAA domain (dynein-related subfamily)	1972	2107	7.8e-24	T	31-10-2019	IPR011704	ATPase, dynein-related, AAA domain	GO:0005524|GO:0016887
Mmel_00001695-RA	e4339ac333b37896f95af4117db6ca95	3997	Pfam	PF08393	Dynein heavy chain, N-terminal region 2	1222	1607	1.2e-102	T	31-10-2019	IPR013602	Dynein heavy chain, domain-2
Mmel_00001695-RA	e4339ac333b37896f95af4117db6ca95	3997	Pfam	PF12774	Hydrolytic ATP binding site of dynein motor region D1	1768	1844	3e-21	T	31-10-2019	IPR035699	Dynein heavy chain, hydrolytic ATP-binding dynein motor region D1	GO:0005524
Mmel_00001695-RA	e4339ac333b37896f95af4117db6ca95	3997	Pfam	PF12780	P-loop containing dynein motor region D4	2620	2867	1.1e-26	T	31-10-2019	IPR024317	Dynein heavy chain, AAA module D4
Mmel_00001695-RA	e4339ac333b37896f95af4117db6ca95	3997	Pfam	PF12777	Microtubule-binding stalk of dynein motor	2890	3201	5e-18	T	31-10-2019	IPR024743	Dynein heavy chain, coiled coil stalk
Mmel_00008105-RA	009fc9be401c058caeb51ec27dd99428	662	Pfam	PF00622	SPRY domain	203	307	5.3e-13	T	31-10-2019	IPR003877	SPRY domain	GO:0005515
Mmel_00008105-RA	009fc9be401c058caeb51ec27dd99428	662	Pfam	PF13671	AAA domain	345	469	7.8e-26	T	31-10-2019
Mmel_00007078-RA	ca713588ed4b3e30a76dd5a15b229dde	91	Pfam	PF05018	Protein of unknown function (DUF667)	1	30	7e-09	T	31-10-2019	IPR007714	Cilia/flagella-associated protein 20/WDR90/C3orf67
Mmel_00011516-RA	727427b2723b8587eaa3adeb2d8e8f14	278	Pfam	PF00929	Exonuclease	109	259	1.1e-20	T	31-10-2019	IPR013520	Exonuclease, RNase T/DNA polymerase III
Mmel_00000890-RA	2f29d01f1d54900d0d4b72351ff56b90	398	Pfam	PF00757	Furin-like cysteine rich region	181	333	4.2e-31	T	31-10-2019	IPR006211	Furin-like cysteine-rich domain	GO:0004714|GO:0005524|GO:0006468|GO:0007169|GO:0016020
Mmel_00000890-RA	2f29d01f1d54900d0d4b72351ff56b90	398	Pfam	PF01030	Receptor L domain	51	162	1.4e-30	T	31-10-2019	IPR000494	Receptor L-domain
Mmel_00012001-RA	9a10f5a93000bcdf8d1590ac353d58a3	546	Pfam	PF07714	Protein tyrosine kinase	231	374	9.9e-52	T	31-10-2019	IPR001245	Serine-threonine/tyrosine-protein kinase, catalytic domain	GO:0004672|GO:0006468
Mmel_00012001-RA	9a10f5a93000bcdf8d1590ac353d58a3	546	Pfam	PF07714	Protein tyrosine kinase	408	450	1.5e-09	T	31-10-2019	IPR001245	Serine-threonine/tyrosine-protein kinase, catalytic domain	GO:0004672|GO:0006468
Mmel_00012001-RA	9a10f5a93000bcdf8d1590ac353d58a3	546	Pfam	PF02953	Tim10/DDP family zinc finger	494	531	8.3e-11	T	31-10-2019	IPR004217	Tim10-like		Reactome: R-HSA-1268020
Mmel_00012001-RA	9a10f5a93000bcdf8d1590ac353d58a3	546	Pfam	PF00018	SH3 domain	119	165	1.1e-13	T	31-10-2019	IPR001452	SH3 domain	GO:0005515
Mmel_00012001-RA	9a10f5a93000bcdf8d1590ac353d58a3	546	Pfam	PF00779	BTK motif	42	69	6.3e-13	T	31-10-2019	IPR001562	Zinc finger, Btk motif	GO:0035556
Mmel_00013002-RA	ee20a82d429bdc33892d453da56b3ec9	470	Pfam	PF00927	Transglutaminase family, C-terminal ig like domain	305	369	9e-11	T	31-10-2019	IPR008958	Transglutaminase, C-terminal	GO:0003810|GO:0018149
Mmel_00013002-RA	ee20a82d429bdc33892d453da56b3ec9	470	Pfam	PF00927	Transglutaminase family, C-terminal ig like domain	420	463	7.4e-07	T	31-10-2019	IPR008958	Transglutaminase, C-terminal	GO:0003810|GO:0018149
Mmel_00013002-RA	ee20a82d429bdc33892d453da56b3ec9	470	Pfam	PF01841	Transglutaminase-like superfamily	105	191	1.1e-17	T	31-10-2019	IPR002931	Transglutaminase-like
Mmel_00012148-RA	141523d0556e747a50b4137eb5139a68	2198	Pfam	PF01465	GRIP domain	2119	2158	4.4e-09	T	31-10-2019	IPR000237	GRIP domain
Mmel_00012214-RA	1042bbb7b90b06450167e25b99702b65	242	Pfam	PF02252	Proteasome activator pa28 beta subunit	97	239	1.9e-65	T	31-10-2019	IPR003186	Proteasome activator PA28, C-terminal domain	GO:0008537	Reactome: R-HSA-1169091|Reactome: R-HSA-1234176|Reactome: R-HSA-1236974|Reactome: R-HSA-1236978|Reactome: R-HSA-174084|Reactome: R-HSA-174113|Reactome: R-HSA-174154|Reactome: R-HSA-174178|Reactome: R-HSA-174184|Reactome: R-HSA-180534|Reactome: R-HSA-180585|Reactome: R-HSA-187577|Reactome: R-HSA-195253|Reactome: R-HSA-202424|Reactome: R-HSA-211733|Reactome: R-HSA-2467813|Reactome: R-HSA-2871837|Re…
Mmel_00012214-RA	1042bbb7b90b06450167e25b99702b65	242	Pfam	PF02251	Proteasome activator pa28 alpha subunit	13	57	5.5e-18	T	31-10-2019	IPR003185	Proteasome activator PA28, N-terminal domain	GO:0008537	Reactome: R-HSA-1169091|Reactome: R-HSA-1234176|Reactome: R-HSA-1236974|Reactome: R-HSA-1236978|Reactome: R-HSA-174084|Reactome: R-HSA-174113|Reactome: R-HSA-174154|Reactome: R-HSA-174178|Reactome: R-HSA-174184|Reactome: R-HSA-180534|Reactome: R-HSA-180585|Reactome: R-HSA-187577|Reactome: R-HSA-195253|Reactome: R-HSA-202424|Reactome: R-HSA-211733|Reactome: R-HSA-2467813|Reactome: R-HSA-2871837|Re…
Mmel_00006303-RA	ed48da70738596873fa0d3d1568daa70	365	Pfam	PF00400	WD domain, G-beta repeat	172	209	6.2e-05	T	31-10-2019	IPR001680	WD40 repeat	GO:0005515
Mmel_00006303-RA	ed48da70738596873fa0d3d1568daa70	365	Pfam	PF00400	WD domain, G-beta repeat	213	251	8.1e-07	T	31-10-2019	IPR001680	WD40 repeat	GO:0005515
Mmel_00006303-RA	ed48da70738596873fa0d3d1568daa70	365	Pfam	PF00400	WD domain, G-beta repeat	46	82	1.6e-05	T	31-10-2019	IPR001680	WD40 repeat	GO:0005515
Mmel_00006303-RA	ed48da70738596873fa0d3d1568daa70	365	Pfam	PF00400	WD domain, G-beta repeat	129	167	4.9e-10	T	31-10-2019	IPR001680	WD40 repeat	GO:0005515
Mmel_00006303-RA	ed48da70738596873fa0d3d1568daa70	365	Pfam	PF00400	WD domain, G-beta repeat	256	293	0.0005	T	31-10-2019	IPR001680	WD40 repeat	GO:0005515
Mmel_00006303-RA	ed48da70738596873fa0d3d1568daa70	365	Pfam	PF00400	WD domain, G-beta repeat	298	335	2.2e-07	T	31-10-2019	IPR001680	WD40 repeat	GO:0005515
Mmel_00006303-RA	ed48da70738596873fa0d3d1568daa70	365	Pfam	PF00400	WD domain, G-beta repeat	86	125	8.6e-07	T	31-10-2019	IPR001680	WD40 repeat	GO:0005515
Mmel_00002123-RA	70f214b9ed89dcf3e348eb885dcfee30	1121	Pfam	PF00041	Fibronectin type III domain	649	733	3.4e-14	T	31-10-2019	IPR003961	Fibronectin type III	GO:0005515
Mmel_00002123-RA	70f214b9ed89dcf3e348eb885dcfee30	1121	Pfam	PF00041	Fibronectin type III domain	457	533	2e-09	T	31-10-2019	IPR003961	Fibronectin type III	GO:0005515
Mmel_00002123-RA	70f214b9ed89dcf3e348eb885dcfee30	1121	Pfam	PF07714	Protein tyrosine kinase	859	1090	2.5e-81	T	31-10-2019	IPR001245	Serine-threonine/tyrosine-protein kinase, catalytic domain	GO:0004672|GO:0006468
Mmel_00001625-RA	9bd2aedc1904fbf413419f2d77e5c2c2	643	Pfam	PF16864	Dimerisation domain	312	395	1.8e-31	T	31-10-2019	IPR031725	Acetylserotonin O-methyltransferase, dimerisation domain
Mmel_00001625-RA	9bd2aedc1904fbf413419f2d77e5c2c2	643	Pfam	PF00891	O-methyltransferase	409	629	3.7e-62	T	31-10-2019	IPR001077	O-methyltransferase, family 2	GO:0008171
Mmel_00001625-RA	9bd2aedc1904fbf413419f2d77e5c2c2	643	Pfam	PF02545	Maf-like protein	14	224	3.4e-52	T	31-10-2019	IPR003697	Maf-like protein	GO:0047429
Mmel_00007741-RA	de77cacebae0d8141be412f1a5450f51	1844	Pfam	PF16095	C-terminal of Roc, COR, domain	782	974	3.3e-24	T	31-10-2019	IPR032171	C-terminal of Roc (COR) domain		KEGG: 04150+2.7.11.1|KEGG: 04151+2.7.11.1|KEGG: 04714+2.7.11.1|KEGG: 04926+2.7.11.1|KEGG: 05165+2.7.11.1
Mmel_00007741-RA	de77cacebae0d8141be412f1a5450f51	1844	Pfam	PF07714	Protein tyrosine kinase	1154	1382	6.5e-35	T	31-10-2019	IPR001245	Serine-threonine/tyrosine-protein kinase, catalytic domain	GO:0004672|GO:0006468
Mmel_00007741-RA	de77cacebae0d8141be412f1a5450f51	1844	Pfam	PF13855	Leucine rich repeat	389	447	1e-06	T	31-10-2019	IPR001611	Leucine-rich repeat	GO:0005515
Mmel_00007741-RA	de77cacebae0d8141be412f1a5450f51	1844	Pfam	PF08477	Ras of Complex, Roc, domain of DAPkinase	578	698	1.5e-22	T	31-10-2019
Mmel_00007747-RA	986f86739a67bd3cb545511a2b017b83	310	Pfam	PF00046	Homeobox domain	89	128	1.6e-06	T	31-10-2019	IPR001356	Homeobox domain	GO:0003677
Mmel_00007747-RA	986f86739a67bd3cb545511a2b017b83	310	Pfam	PF03798	TLC domain	165	301	6.5e-28	T	31-10-2019	IPR006634	TRAM/LAG1/CLN8 homology domain	GO:0016021
Mmel_00010949-RA	49fdc3803ae1c14de40037a3748b701f	710	Pfam	PF00530	Scavenger receptor cysteine-rich domain	6	102	6.2e-24	T	31-10-2019	IPR001190	SRCR domain	GO:0005044|GO:0016020
Mmel_00010949-RA	49fdc3803ae1c14de40037a3748b701f	710	Pfam	PF00530	Scavenger receptor cysteine-rich domain	339	434	2.6e-31	T	31-10-2019	IPR001190	SRCR domain	GO:0005044|GO:0016020
Mmel_00010949-RA	49fdc3803ae1c14de40037a3748b701f	710	Pfam	PF00530	Scavenger receptor cysteine-rich domain	116	211	6.4e-33	T	31-10-2019	IPR001190	SRCR domain	GO:0005044|GO:0016020
Mmel_00010949-RA	49fdc3803ae1c14de40037a3748b701f	710	Pfam	PF00530	Scavenger receptor cysteine-rich domain	223	320	5.5e-30	T	31-10-2019	IPR001190	SRCR domain	GO:0005044|GO:0016020
Mmel_00010949-RA	49fdc3803ae1c14de40037a3748b701f	710	Pfam	PF00089	Trypsin	466	704	2.6e-66	T	31-10-2019	IPR001254	Serine proteases, trypsin domain	GO:0004252|GO:0006508
Mmel_00003584-RA	e30c3f2be71c6efbbd1ce33f282ebf1a	319	Pfam	PF00040	Fibronectin type II domain	184	225	1.2e-16	T	31-10-2019	IPR000562	Fibronectin type II domain
Mmel_00003584-RA	e30c3f2be71c6efbbd1ce33f282ebf1a	319	Pfam	PF00652	Ricin-type beta-trefoil lectin domain	43	123	1e-08	T	31-10-2019	IPR000772	Ricin B, lectin domain
Mmel_00003584-RA	e30c3f2be71c6efbbd1ce33f282ebf1a	319	Pfam	PF00059	Lectin C-type domain	251	317	2.7e-12	T	31-10-2019	IPR001304	C-type lectin-like
Mmel_00009166-RA	1c8513059f8a9cdca4c4b3ae127ef687	618	Pfam	PF00054	Laminin G domain	282	407	6.1e-25	T	31-10-2019	IPR001791	Laminin G domain
Mmel_00009166-RA	1c8513059f8a9cdca4c4b3ae127ef687	618	Pfam	PF02210	Laminin G domain	467	594	4.2e-07	T	31-10-2019	IPR001791	Laminin G domain
Mmel_00009166-RA	1c8513059f8a9cdca4c4b3ae127ef687	618	Pfam	PF07645	Calcium-binding EGF domain	153	193	8.4e-09	T	31-10-2019	IPR001881	EGF-like calcium-binding domain	GO:0005509
Mmel_00009166-RA	1c8513059f8a9cdca4c4b3ae127ef687	618	Pfam	PF07645	Calcium-binding EGF domain	195	234	0.00058	T	31-10-2019	IPR001881	EGF-like calcium-binding domain	GO:0005509
Mmel_00009166-RA	1c8513059f8a9cdca4c4b3ae127ef687	618	Pfam	PF07645	Calcium-binding EGF domain	112	151	2.2e-06	T	31-10-2019	IPR001881	EGF-like calcium-binding domain	GO:0005509
Mmel_00009166-RA	1c8513059f8a9cdca4c4b3ae127ef687	618	Pfam	PF00008	EGF-like domain	76	108	2.3e-06	T	31-10-2019	IPR000742	EGF-like domain
Mmel_00009166-RA	1c8513059f8a9cdca4c4b3ae127ef687	618	Pfam	PF00594	Vitamin K-dependent carboxylation/gamma-carboxyglutamic (GLA) domain	1	40	7.9e-17	T	31-10-2019	IPR000294	Gamma-carboxyglutamic acid-rich (GLA) domain	GO:0005509|GO:0005576
Mmel_00001316-RA	d78cc8f3c43022f0f5691c33526eb53b	623	Pfam	PF06087	Tyrosyl-DNA phosphodiesterase	166	581	6.7e-117	T	31-10-2019	IPR010347	Tyrosyl-DNA phosphodiesterase I	GO:0005634|GO:0006281|GO:0008081	Reactome: R-HSA-5693571
Mmel_00004185-RA	51c04e84c5a55532775911b9845686c2	258	Pfam	PF07686	Immunoglobulin V-set domain	8	62	5.1e-09	T	31-10-2019	IPR013106	Immunoglobulin V-set domain
Mmel_00004185-RA	51c04e84c5a55532775911b9845686c2	258	Pfam	PF13927	Immunoglobulin domain	78	141	1.1e-09	T	31-10-2019
Mmel_00002911-RA	e90fa0571a846d12322b14c94c2af2fc	395	Pfam	PF00351	Biopterin-dependent aromatic amino acid hydroxylase	265	392	2.7e-51	T	31-10-2019	IPR019774	Aromatic amino acid hydroxylase, C-terminal	GO:0016714|GO:0055114
Mmel_00002911-RA	e90fa0571a846d12322b14c94c2af2fc	395	Pfam	PF00351	Biopterin-dependent aromatic amino acid hydroxylase	81	266	6.2e-107	T	31-10-2019	IPR019774	Aromatic amino acid hydroxylase, C-terminal	GO:0016714|GO:0055114
Mmel_00013171-RA	82dafb666c6ad02f6c4f88380ce8205d	310	Pfam	PF00688	TGF-beta propeptide	55	256	2.4e-23	T	31-10-2019	IPR001111	TGF-beta, propeptide
Mmel_00009236-RA	2cbf6413496d55b6992b5ccc6d0d6fd9	143	Pfam	PF04133	Vacuolar protein sorting 55	19	134	2e-38	T	31-10-2019	IPR007262	Vacuolar protein sorting 55
Mmel_00000498-RA	5ef559b1e6e32406a457b0e42d96b8e9	176	Pfam	PF00096	Zinc finger, C2H2 type	37	60	0.0028	T	31-10-2019
Mmel_00000498-RA	5ef559b1e6e32406a457b0e42d96b8e9	176	Pfam	PF00096	Zinc finger, C2H2 type	66	88	1.3e-07	T	31-10-2019
Mmel_00000498-RA	5ef559b1e6e32406a457b0e42d96b8e9	176	Pfam	PF00096	Zinc finger, C2H2 type	94	116	6.8e-05	T	31-10-2019
Mmel_00000301-RA	e95e5bbad2cbe49a78837159ac529699	1013	Pfam	PF00431	CUB domain	461	524	4.1e-12	T	31-10-2019	IPR000859	CUB domain
Mmel_00000301-RA	e95e5bbad2cbe49a78837159ac529699	1013	Pfam	PF00431	CUB domain	102	222	2.4e-19	T	31-10-2019	IPR000859	CUB domain
Mmel_00000301-RA	e95e5bbad2cbe49a78837159ac529699	1013	Pfam	PF00431	CUB domain	289	394	2.9e-23	T	31-10-2019	IPR000859	CUB domain
Mmel_00000301-RA	e95e5bbad2cbe49a78837159ac529699	1013	Pfam	PF00431	CUB domain	663	764	6.1e-20	T	31-10-2019	IPR000859	CUB domain
Mmel_00000301-RA	e95e5bbad2cbe49a78837159ac529699	1013	Pfam	PF00084	Sushi repeat (SCR repeat)	899	949	1.6e-08	T	31-10-2019	IPR000436	Sushi/SCR/CCP domain
Mmel_00000301-RA	e95e5bbad2cbe49a78837159ac529699	1013	Pfam	PF00084	Sushi repeat (SCR repeat)	832	889	1.1e-09	T	31-10-2019	IPR000436	Sushi/SCR/CCP domain
Mmel_00000301-RA	e95e5bbad2cbe49a78837159ac529699	1013	Pfam	PF00084	Sushi repeat (SCR repeat)	595	652	5.8e-10	T	31-10-2019	IPR000436	Sushi/SCR/CCP domain
Mmel_00000301-RA	e95e5bbad2cbe49a78837159ac529699	1013	Pfam	PF00084	Sushi repeat (SCR repeat)	41	98	3e-05	T	31-10-2019	IPR000436	Sushi/SCR/CCP domain
Mmel_00000301-RA	e95e5bbad2cbe49a78837159ac529699	1013	Pfam	PF00084	Sushi repeat (SCR repeat)	402	457	5.1e-09	T	31-10-2019	IPR000436	Sushi/SCR/CCP domain
Mmel_00000301-RA	e95e5bbad2cbe49a78837159ac529699	1013	Pfam	PF00084	Sushi repeat (SCR repeat)	230	285	7.4e-10	T	31-10-2019	IPR000436	Sushi/SCR/CCP domain
Mmel_00000301-RA	e95e5bbad2cbe49a78837159ac529699	1013	Pfam	PF00084	Sushi repeat (SCR repeat)	959	1012	8.3e-07	T	31-10-2019	IPR000436	Sushi/SCR/CCP domain
Mmel_00000301-RA	e95e5bbad2cbe49a78837159ac529699	1013	Pfam	PF00084	Sushi repeat (SCR repeat)	769	827	4.7e-05	T	31-10-2019	IPR000436	Sushi/SCR/CCP domain
Mmel_00006345-RA	4036cfaac14bc55ac6ad146342734677	964	Pfam	PF00079	Serpin (serine protease inhibitor)	742	795	2.1e-09	T	31-10-2019	IPR023796	Serpin domain
Mmel_00006345-RA	4036cfaac14bc55ac6ad146342734677	964	Pfam	PF00079	Serpin (serine protease inhibitor)	51	418	2e-108	T	31-10-2019	IPR023796	Serpin domain
Mmel_00006345-RA	4036cfaac14bc55ac6ad146342734677	964	Pfam	PF00079	Serpin (serine protease inhibitor)	808	941	2.7e-36	T	31-10-2019	IPR023796	Serpin domain
Mmel_00006345-RA	4036cfaac14bc55ac6ad146342734677	964	Pfam	PF00079	Serpin (serine protease inhibitor)	430	677	4.6e-76	T	31-10-2019	IPR023796	Serpin domain
Mmel_00000088-RA	a26c571d24d1257e260fdc08defb490d	188	Pfam	PF00076	RNA recognition motif. (a.k.a. RRM, RBD, or RNP domain)	20	86	4.1e-20	T	31-10-2019	IPR000504	RNA recognition motif domain	GO:0003676
Mmel_00010249-RA	a3455e0edeb8a9e3560b142acbb79013	208	Pfam	PF03298	Stanniocalcin family	36	156	5.4e-65	T	31-10-2019	IPR004978	Stanniocalcin	GO:0005179|GO:0005576
Mmel_00006252-RA	92a5ecf8144dc13e50c17dfd28713efc	157	Pfam	PF04970	Lecithin retinol acyltransferase	2	105	8.5e-27	T	31-10-2019	IPR007053	LRAT-like domain
Mmel_00014014-RA	e7c915c823a3e47d45f9b120ee52e931	394	Pfam	PF00675	Insulinase (Peptidase family M16)	1	105	1.2e-26	T	31-10-2019	IPR011765	Peptidase M16, N-terminal
Mmel_00014014-RA	e7c915c823a3e47d45f9b120ee52e931	394	Pfam	PF05193	Peptidase M16 inactive domain	112	294	1.6e-29	T	31-10-2019	IPR007863	Peptidase M16, C-terminal
Mmel_00014174-RA	d4bae188c4082268eb68199c9f420aba	239	Pfam	PF15297	Cytoskeleton-associated protein 2 C-terminus	43	177	6.2e-26	T	31-10-2019	IPR029197	Cytoskeleton-associated protein 2, C-terminal
Mmel_00009807-RA	823cb97383bdc2b1ea9bd1132acbc3a7	138	Pfam	PF04101	Glycosyltransferase family 28 C-terminal domain	6	124	1.9e-24	T	31-10-2019	IPR007235	Glycosyl transferase, family 28, C-terminal	GO:0016758	KEGG: 00550+2.4.1.227|MetaCyc: PWY-5265|MetaCyc: PWY-6385|MetaCyc: PWY-6470|MetaCyc: PWY-6471|Reactome: R-HSA-446193|Reactome: R-HSA-5633231
Mmel_00011133-RA	f374c57c182da85b28d24856d53781e6	852	Pfam	PF00620	RhoGAP domain	539	688	7e-48	T	31-10-2019	IPR000198	Rho GTPase-activating protein domain	GO:0007165	Reactome: R-HSA-194840
Mmel_00011133-RA	f374c57c182da85b28d24856d53781e6	852	Pfam	PF07653	Variant SH3 domain	749	799	7.7e-10	T	31-10-2019	IPR001452	SH3 domain	GO:0005515
Mmel_00011133-RA	f374c57c182da85b28d24856d53781e6	852	Pfam	PF00611	Fes/CIP4, and EFC/F-BAR homology domain	26	168	6.7e-19	T	31-10-2019	IPR001060	FCH domain
Mmel_00006498-RA	d23eb56fee41510f8d660915156c604c	550	Pfam	PF01403	Sema domain	65	474	9.6e-136	T	31-10-2019	IPR001627	Sema domain	GO:0005515
Mmel_00006498-RA	d23eb56fee41510f8d660915156c604c	550	Pfam	PF01437	Plexin repeat	514	544	3.7e-06	T	31-10-2019	IPR002165	Plexin repeat
Mmel_00014801-RA	6cf32ea935bbe2db76b93fa1863f7f74	115	Pfam	PF00227	Proteasome subunit	64	115	1e-09	T	31-10-2019	IPR001353	Proteasome, subunit alpha/beta	GO:0004298|GO:0005839|GO:0051603	Reactome: R-HSA-1169091|Reactome: R-HSA-1234176|Reactome: R-HSA-1236974|Reactome: R-HSA-1236978|Reactome: R-HSA-174084|Reactome: R-HSA-174113|Reactome: R-HSA-174154|Reactome: R-HSA-174178|Reactome: R-HSA-174184|Reactome: R-HSA-180534|Reactome: R-HSA-180585|Reactome: R-HSA-187577|Reactome: R-HSA-195253|Reactome: R-HSA-202424|Reactome: R-HSA-211733|Reactome: R-HSA-2467813|Reactome: R-HSA-2871837|Re…
Mmel_00008674-RA	ea07a1526416975fbb94ec3fd873571a	732	Pfam	PF04571	lipin, N-terminal conserved region	7	100	2.1e-41	T	31-10-2019	IPR007651	Lipin, N-terminal		KEGG: 00561+3.1.3.4|KEGG: 00564+3.1.3.4|KEGG: 00565+3.1.3.4|KEGG: 00600+3.1.3.4|MetaCyc: PWY-6453|MetaCyc: PWY-7782|Reactome: R-HSA-1483191|Reactome: R-HSA-1483213|Reactome: R-HSA-4419969|Reactome: R-HSA-75109
Mmel_00008674-RA	ea07a1526416975fbb94ec3fd873571a	732	Pfam	PF16876	Lipin/Ned1/Smp2 multi-domain protein middle domain	343	435	6.4e-32	T	31-10-2019	IPR031703	Lipin, middle domain		KEGG: 00561+3.1.3.4|KEGG: 00564+3.1.3.4|KEGG: 00565+3.1.3.4|KEGG: 00600+3.1.3.4|MetaCyc: PWY-6453|MetaCyc: PWY-7782|Reactome: R-HSA-1483191|Reactome: R-HSA-1483213|Reactome: R-HSA-4419969|Reactome: R-HSA-75109
Mmel_00008674-RA	ea07a1526416975fbb94ec3fd873571a	732	Pfam	PF08235	LNS2 (Lipin/Ned1/Smp2)	477	701	9.1e-103	T	31-10-2019	IPR013209	Lipin/Ned1/Smp2 (LNS2)		KEGG: 00561+3.1.3.4|KEGG: 00564+3.1.3.4|KEGG: 00565+3.1.3.4|KEGG: 00600+3.1.3.4|MetaCyc: PWY-6453|MetaCyc: PWY-7782|Reactome: R-HSA-1483191|Reactome: R-HSA-1483213|Reactome: R-HSA-4419969|Reactome: R-HSA-75109
Mmel_00011781-RA	b6a43e8d49d92e10cc920c0b179b1181	311	Pfam	PF00003	7 transmembrane sweet-taste receptor of 3 GCPR	10	235	4.3e-54	T	31-10-2019	IPR017978	GPCR family 3, C-terminal	GO:0004930|GO:0007186|GO:0016021
Mmel_00006623-RA	83af4fa91227b977a392267883c5a1f2	326	Pfam	PF10226	CCDC85 family	6	137	1e-64	T	31-10-2019	IPR019359	CCDC85 family
Mmel_00007277-RA	126b93b7d3e7a45677a790742c185b73	409	Pfam	PF05030	SSXT protein (N-terminal region)	14	73	4.1e-32	T	31-10-2019	IPR007726	SS18 family	GO:0003713
Mmel_00006649-RA	40bd2b9c62625948d3e72d770662ef72	318	Pfam	PF00520	Ion transport protein	6	207	4.4e-21	T	31-10-2019	IPR005821	Ion transport domain	GO:0005216|GO:0006811|GO:0016020|GO:0055085
Mmel_00015043-RA	07d078891f28d18bc2b1ef7aa28350a0	172	Pfam	PF10589	NADH-ubiquinone oxidoreductase-F iron-sulfur binding region	75	157	6.4e-31	T	31-10-2019	IPR019575	NADH-ubiquinone oxidoreductase 51kDa subunit, iron-sulphur binding domain	GO:0051539	Reactome: R-HSA-611105|Reactome: R-HSA-6799198
Mmel_00011395-RA	897f1b7a1b7f6863438c2e2ff0b5d7a2	2791	Pfam	PF05924	SAMP Motif	1525	1546	7.4e-08	T	31-10-2019	IPR009224	SAMP	GO:0008013|GO:0016055
Mmel_00011395-RA	897f1b7a1b7f6863438c2e2ff0b5d7a2	2791	Pfam	PF05924	SAMP Motif	1678	1696	1.1e-07	T	31-10-2019	IPR009224	SAMP	GO:0008013|GO:0016055
Mmel_00011395-RA	897f1b7a1b7f6863438c2e2ff0b5d7a2	2791	Pfam	PF05924	SAMP Motif	1979	1999	3.9e-10	T	31-10-2019	IPR009224	SAMP	GO:0008013|GO:0016055
Mmel_00011395-RA	897f1b7a1b7f6863438c2e2ff0b5d7a2	2791	Pfam	PF05956	APC basic domain	2171	2522	8.7e-97	T	31-10-2019	IPR009234	Adenomatous polyposis coli protein basic domain	GO:0008017|GO:0016055
Mmel_00011395-RA	897f1b7a1b7f6863438c2e2ff0b5d7a2	2791	Pfam	PF05923	APC repeat	1596	1619	2.8e-11	T	31-10-2019	IPR009223	Adenomatous polyposis coli protein repeat	GO:0016055
Mmel_00011395-RA	897f1b7a1b7f6863438c2e2ff0b5d7a2	2791	Pfam	PF05923	APC repeat	1897	1919	3e-10	T	31-10-2019	IPR009223	Adenomatous polyposis coli protein repeat	GO:0016055
Mmel_00011395-RA	897f1b7a1b7f6863438c2e2ff0b5d7a2	2791	Pfam	PF05923	APC repeat	1445	1468	1.2e-05	T	31-10-2019	IPR009223	Adenomatous polyposis coli protein repeat	GO:0016055
Mmel_00011395-RA	897f1b7a1b7f6863438c2e2ff0b5d7a2	2791	Pfam	PF05923	APC repeat	1332	1353	8.8e-07	T	31-10-2019	IPR009223	Adenomatous polyposis coli protein repeat	GO:0016055
Mmel_00011395-RA	897f1b7a1b7f6863438c2e2ff0b5d7a2	2791	Pfam	PF05923	APC repeat	1956	1978	1.8e-10	T	31-10-2019	IPR009223	Adenomatous polyposis coli protein repeat	GO:0016055
Mmel_00011395-RA	897f1b7a1b7f6863438c2e2ff0b5d7a2	2791	Pfam	PF05923	APC repeat	1218	1239	1.6e-11	T	31-10-2019	IPR009223	Adenomatous polyposis coli protein repeat	GO:0016055
Mmel_00011395-RA	897f1b7a1b7f6863438c2e2ff0b5d7a2	2791	Pfam	PF05923	APC repeat	1798	1822	7.4e-11	T	31-10-2019	IPR009223	Adenomatous polyposis coli protein repeat	GO:0016055
Mmel_00011395-RA	897f1b7a1b7f6863438c2e2ff0b5d7a2	2791	Pfam	PF00514	Armadillo/beta-catenin-like repeat	603	643	1.4e-06	T	31-10-2019	IPR000225	Armadillo	GO:0005515
Mmel_00011395-RA	897f1b7a1b7f6863438c2e2ff0b5d7a2	2791	Pfam	PF00514	Armadillo/beta-catenin-like repeat	472	506	0.00018	T	31-10-2019	IPR000225	Armadillo	GO:0005515
Mmel_00011395-RA	897f1b7a1b7f6863438c2e2ff0b5d7a2	2791	Pfam	PF11414	Adenomatous polyposis coli tumour suppressor protein	117	192	1.8e-21	T	31-10-2019
Mmel_00011395-RA	897f1b7a1b7f6863438c2e2ff0b5d7a2	2791	Pfam	PF16633	Unstructured region on APC between 1st two creatine-rich regions	1241	1328	1.3e-40	T	31-10-2019
Mmel_00011395-RA	897f1b7a1b7f6863438c2e2ff0b5d7a2	2791	Pfam	PF16630	Unstructured region on APC between 1st and 2nd catenin-bdg motifs	994	1093	6.7e-51	T	31-10-2019
Mmel_00011395-RA	897f1b7a1b7f6863438c2e2ff0b5d7a2	2791	Pfam	PF16636	Unstructured region on APC between APC_crr regions 5 and 6	1824	1894	1.2e-28	T	31-10-2019
Mmel_00011395-RA	897f1b7a1b7f6863438c2e2ff0b5d7a2	2791	Pfam	PF16634	Unstructured region on APC between APC_crr and SAMP	1621	1674	2.5e-25	T	31-10-2019
Mmel_00011395-RA	897f1b7a1b7f6863438c2e2ff0b5d7a2	2791	Pfam	PF05937	EB-1 Binding Domain	2618	2791	1.2e-91	T	31-10-2019	IPR009232	EB-1 binding	GO:0008013|GO:0016055	Reactome: R-HSA-111465|Reactome: R-HSA-195253|Reactome: R-HSA-196299|Reactome: R-HSA-3769402|Reactome: R-HSA-4641262|Reactome: R-HSA-5339716|Reactome: R-HSA-5358747|Reactome: R-HSA-5358749|Reactome: R-HSA-5358751|Reactome: R-HSA-5358752|Reactome: R-HSA-5467333|Reactome: R-HSA-5467337|Reactome: R-HSA-5467340|Reactome: R-HSA-5467348|Reactome: R-HSA-5689896
Mmel_00011395-RA	897f1b7a1b7f6863438c2e2ff0b5d7a2	2791	Pfam	PF16635	Unstructured region on APC between SAMP and APC_crr	1705	1796	1.2e-36	T	31-10-2019
Mmel_00011395-RA	897f1b7a1b7f6863438c2e2ff0b5d7a2	2791	Pfam	PF16629	Armadillo-associated region on APC	686	977	1.9e-171	T	31-10-2019
Mmel_00011395-RA	897f1b7a1b7f6863438c2e2ff0b5d7a2	2791	Pfam	PF05972	APC 15 residue motif	1113	1127	4.8e-05	T	31-10-2019	IPR009240	Adenomatous polyposis coli protein, 15 residue repeat	GO:0008013|GO:0016055	Reactome: R-HSA-111465|Reactome: R-HSA-195253|Reactome: R-HSA-196299|Reactome: R-HSA-3769402|Reactome: R-HSA-4641262|Reactome: R-HSA-5339716|Reactome: R-HSA-5358747|Reactome: R-HSA-5358749|Reactome: R-HSA-5358751|Reactome: R-HSA-5358752|Reactome: R-HSA-5467333|Reactome: R-HSA-5467337|Reactome: R-HSA-5467340|Reactome: R-HSA-5467348|Reactome: R-HSA-5689896
Mmel_00011395-RA	897f1b7a1b7f6863438c2e2ff0b5d7a2	2791	Pfam	PF05972	APC 15 residue motif	1130	1144	4.7e-06	T	31-10-2019	IPR009240	Adenomatous polyposis coli protein, 15 residue repeat	GO:0008013|GO:0016055	Reactome: R-HSA-111465|Reactome: R-HSA-195253|Reactome: R-HSA-196299|Reactome: R-HSA-3769402|Reactome: R-HSA-4641262|Reactome: R-HSA-5339716|Reactome: R-HSA-5358747|Reactome: R-HSA-5358749|Reactome: R-HSA-5358751|Reactome: R-HSA-5358752|Reactome: R-HSA-5467333|Reactome: R-HSA-5467337|Reactome: R-HSA-5467340|Reactome: R-HSA-5467348|Reactome: R-HSA-5689896
Mmel_00011395-RA	897f1b7a1b7f6863438c2e2ff0b5d7a2	2791	Pfam	PF05972	APC 15 residue motif	978	992	6.2e-05	T	31-10-2019	IPR009240	Adenomatous polyposis coli protein, 15 residue repeat	GO:0008013|GO:0016055	Reactome: R-HSA-111465|Reactome: R-HSA-195253|Reactome: R-HSA-196299|Reactome: R-HSA-3769402|Reactome: R-HSA-4641262|Reactome: R-HSA-5339716|Reactome: R-HSA-5358747|Reactome: R-HSA-5358749|Reactome: R-HSA-5358751|Reactome: R-HSA-5358752|Reactome: R-HSA-5467333|Reactome: R-HSA-5467337|Reactome: R-HSA-5467340|Reactome: R-HSA-5467348|Reactome: R-HSA-5689896
Mmel_00007801-RA	9ec6312a2f10c0c2aa47dfbac7a91453	999	Pfam	PF00084	Sushi repeat (SCR repeat)	192	248	4.5e-09	T	31-10-2019	IPR000436	Sushi/SCR/CCP domain
Mmel_00007801-RA	9ec6312a2f10c0c2aa47dfbac7a91453	999	Pfam	PF00084	Sushi repeat (SCR repeat)	542	599	9.6e-07	T	31-10-2019	IPR000436	Sushi/SCR/CCP domain
Mmel_00007801-RA	9ec6312a2f10c0c2aa47dfbac7a91453	999	Pfam	PF00084	Sushi repeat (SCR repeat)	365	422	3.1e-06	T	31-10-2019	IPR000436	Sushi/SCR/CCP domain
Mmel_00007801-RA	9ec6312a2f10c0c2aa47dfbac7a91453	999	Pfam	PF00084	Sushi repeat (SCR repeat)	880	935	7e-11	T	31-10-2019	IPR000436	Sushi/SCR/CCP domain
Mmel_00007801-RA	9ec6312a2f10c0c2aa47dfbac7a91453	999	Pfam	PF00084	Sushi repeat (SCR repeat)	708	763	6.7e-08	T	31-10-2019	IPR000436	Sushi/SCR/CCP domain
Mmel_00007801-RA	9ec6312a2f10c0c2aa47dfbac7a91453	999	Pfam	PF00084	Sushi repeat (SCR repeat)	6	62	9.4e-08	T	31-10-2019	IPR000436	Sushi/SCR/CCP domain
Mmel_00007801-RA	9ec6312a2f10c0c2aa47dfbac7a91453	999	Pfam	PF00431	CUB domain	603	700	1.1e-17	T	31-10-2019	IPR000859	CUB domain
Mmel_00007801-RA	9ec6312a2f10c0c2aa47dfbac7a91453	999	Pfam	PF00431	CUB domain	767	872	3.8e-23	T	31-10-2019	IPR000859	CUB domain
Mmel_00007801-RA	9ec6312a2f10c0c2aa47dfbac7a91453	999	Pfam	PF00431	CUB domain	66	184	3.2e-18	T	31-10-2019	IPR000859	CUB domain
Mmel_00007801-RA	9ec6312a2f10c0c2aa47dfbac7a91453	999	Pfam	PF00431	CUB domain	426	531	6e-16	T	31-10-2019	IPR000859	CUB domain
Mmel_00007801-RA	9ec6312a2f10c0c2aa47dfbac7a91453	999	Pfam	PF00431	CUB domain	939	994	9.5e-11	T	31-10-2019	IPR000859	CUB domain
Mmel_00007801-RA	9ec6312a2f10c0c2aa47dfbac7a91453	999	Pfam	PF00431	CUB domain	252	357	2.1e-28	T	31-10-2019	IPR000859	CUB domain
Mmel_00014181-RA	20b66fd3aaf12472e4185566b97cdfad	494	Pfam	PF03148	Tektin family	98	480	7.7e-143	T	31-10-2019
Mmel_00011492-RA	bcfd660e9894ff175b743f6e2e2eb35d	221	Pfam	PF13855	Leucine rich repeat	101	161	3.4e-10	T	31-10-2019	IPR001611	Leucine-rich repeat	GO:0005515
Mmel_00006453-RA	3b0a59608e5288baf4e11e1e798e7be5	496	Pfam	PF02182	SAD/SRA domain	137	298	5.7e-36	T	31-10-2019	IPR003105	SRA-YDG
Mmel_00006453-RA	3b0a59608e5288baf4e11e1e798e7be5	496	Pfam	PF00097	Zinc finger, C3HC4 type (RING finger)	427	465	0.00019	T	31-10-2019	IPR018957	Zinc finger, C3HC4 RING-type	GO:0046872
Mmel_00006453-RA	3b0a59608e5288baf4e11e1e798e7be5	496	Pfam	PF00628	PHD-finger	43	90	9.2e-10	T	31-10-2019	IPR019787	Zinc finger, PHD-finger
Mmel_00001298-RA	97e52a841a5e9427344b79058589a190	765	Pfam	PF08238	Sel1 repeat	266	293	8.1	T	31-10-2019	IPR006597	Sel1-like repeat
Mmel_00001298-RA	97e52a841a5e9427344b79058589a190	765	Pfam	PF08238	Sel1 repeat	229	260	8.9	T	31-10-2019	IPR006597	Sel1-like repeat
Mmel_00001298-RA	97e52a841a5e9427344b79058589a190	765	Pfam	PF08238	Sel1 repeat	637	670	5e-08	T	31-10-2019	IPR006597	Sel1-like repeat
Mmel_00001298-RA	97e52a841a5e9427344b79058589a190	765	Pfam	PF08238	Sel1 repeat	383	419	4.5e-08	T	31-10-2019	IPR006597	Sel1-like repeat
Mmel_00001298-RA	97e52a841a5e9427344b79058589a190	765	Pfam	PF08238	Sel1 repeat	458	491	4.1e-07	T	31-10-2019	IPR006597	Sel1-like repeat
Mmel_00001298-RA	97e52a841a5e9427344b79058589a190	765	Pfam	PF08238	Sel1 repeat	496	520	8.9	T	31-10-2019	IPR006597	Sel1-like repeat
Mmel_00001298-RA	97e52a841a5e9427344b79058589a190	765	Pfam	PF08238	Sel1 repeat	602	635	0.00028	T	31-10-2019	IPR006597	Sel1-like repeat
Mmel_00001298-RA	97e52a841a5e9427344b79058589a190	765	Pfam	PF08238	Sel1 repeat	193	226	0.59	T	31-10-2019	IPR006597	Sel1-like repeat
Mmel_00001298-RA	97e52a841a5e9427344b79058589a190	765	Pfam	PF08238	Sel1 repeat	585	599	150	T	31-10-2019	IPR006597	Sel1-like repeat
Mmel_00001298-RA	97e52a841a5e9427344b79058589a190	765	Pfam	PF08238	Sel1 repeat	177	191	17	T	31-10-2019	IPR006597	Sel1-like repeat
Mmel_00001298-RA	97e52a841a5e9427344b79058589a190	765	Pfam	PF08238	Sel1 repeat	347	382	8.4e-07	T	31-10-2019	IPR006597	Sel1-like repeat
Mmel_00001298-RA	97e52a841a5e9427344b79058589a190	765	Pfam	PF08238	Sel1 repeat	422	454	1e-09	T	31-10-2019	IPR006597	Sel1-like repeat
Mmel_00001298-RA	97e52a841a5e9427344b79058589a190	765	Pfam	PF00040	Fibronectin type II domain	100	141	1.2e-17	T	31-10-2019	IPR000562	Fibronectin type II domain
Mmel_00009640-RA	a1cfab6c58e54dcd1c953a9c3cd819dc	292	Pfam	PF03029	Conserved hypothetical ATP binding protein	58	262	8.8e-67	T	31-10-2019	IPR004130	GPN-loop GTPase
Mmel_00012228-RA	1c82eede5e4bca5b0a02ee85b9e9d27e	379	Pfam	PF13418	Galactose oxidase, central domain	269	309	1e-09	T	31-10-2019
Mmel_00012228-RA	1c82eede5e4bca5b0a02ee85b9e9d27e	379	Pfam	PF01344	Kelch motif	218	258	1.3e-06	T	31-10-2019	IPR006652	Kelch repeat type 1	GO:0005515
Mmel_00012228-RA	1c82eede5e4bca5b0a02ee85b9e9d27e	379	Pfam	PF13854	Kelch motif	30	76	1.7e-05	T	31-10-2019
Mmel_00008577-RA	949b687204db74ce50783d3b4a9e8d9f	374	Pfam	PF00226	DnaJ domain	18	58	3.3e-16	T	31-10-2019	IPR001623	DnaJ domain
Mmel_00008577-RA	949b687204db74ce50783d3b4a9e8d9f	374	Pfam	PF01556	DnaJ C terminal domain	159	301	4.3e-36	T	31-10-2019	IPR002939	Chaperone DnaJ, C-terminal
Mmel_00008577-RA	949b687204db74ce50783d3b4a9e8d9f	374	Pfam	PF00684	DnaJ central domain	113	172	1.4e-14	T	31-10-2019	IPR001305	Heat shock protein DnaJ, cysteine-rich domain	GO:0031072|GO:0051082
Mmel_00002302-RA	24d1c33b40b13d2bfccf828ef90a1ee1	1128	Pfam	PF02210	Laminin G domain	276	408	8.7e-21	T	31-10-2019	IPR001791	Laminin G domain
Mmel_00002302-RA	24d1c33b40b13d2bfccf828ef90a1ee1	1128	Pfam	PF02210	Laminin G domain	740	864	7.7e-14	T	31-10-2019	IPR001791	Laminin G domain
Mmel_00002302-RA	24d1c33b40b13d2bfccf828ef90a1ee1	1128	Pfam	PF02210	Laminin G domain	503	619	4.9e-14	T	31-10-2019	IPR001791	Laminin G domain
Mmel_00002302-RA	24d1c33b40b13d2bfccf828ef90a1ee1	1128	Pfam	PF00008	EGF-like domain	978	1007	6.8e-05	T	31-10-2019	IPR000742	EGF-like domain
Mmel_00002302-RA	24d1c33b40b13d2bfccf828ef90a1ee1	1128	Pfam	PF00008	EGF-like domain	941	970	0.00013	T	31-10-2019	IPR000742	EGF-like domain
Mmel_00002302-RA	24d1c33b40b13d2bfccf828ef90a1ee1	1128	Pfam	PF00008	EGF-like domain	903	932	1.2e-07	T	31-10-2019	IPR000742	EGF-like domain
Mmel_00002302-RA	24d1c33b40b13d2bfccf828ef90a1ee1	1128	Pfam	PF00008	EGF-like domain	435	464	2.6e-07	T	31-10-2019	IPR000742	EGF-like domain
Mmel_00002302-RA	24d1c33b40b13d2bfccf828ef90a1ee1	1128	Pfam	PF00008	EGF-like domain	651	680	1.3e-05	T	31-10-2019	IPR000742	EGF-like domain
Mmel_00002302-RA	24d1c33b40b13d2bfccf828ef90a1ee1	1128	Pfam	PF00008	EGF-like domain	207	241	8.1e-07	T	31-10-2019	IPR000742	EGF-like domain
Mmel_00002302-RA	24d1c33b40b13d2bfccf828ef90a1ee1	1128	Pfam	PF00008	EGF-like domain	1061	1091	4.2e-07	T	31-10-2019	IPR000742	EGF-like domain
Mmel_00002302-RA	24d1c33b40b13d2bfccf828ef90a1ee1	1128	Pfam	PF07645	Calcium-binding EGF domain	159	187	0.00035	T	31-10-2019	IPR001881	EGF-like calcium-binding domain	GO:0005509
Mmel_00006843-RA	caa4cc6b610a6507847ba294a61bf8bd	1306	Pfam	PF01347	Lipoprotein amino terminal region	261	369	4.2e-19	T	31-10-2019	IPR001747	Lipid transport protein, N-terminal	GO:0005319|GO:0006869	Reactome: R-HSA-8866423|Reactome: R-HSA-8963888
Mmel_00006843-RA	caa4cc6b610a6507847ba294a61bf8bd	1306	Pfam	PF01347	Lipoprotein amino terminal region	16	260	1.4e-13	T	31-10-2019	IPR001747	Lipid transport protein, N-terminal	GO:0005319|GO:0006869	Reactome: R-HSA-8866423|Reactome: R-HSA-8963888
Mmel_00006843-RA	caa4cc6b610a6507847ba294a61bf8bd	1306	Pfam	PF09172	Domain of unknown function (DUF1943)	426	643	1.8e-27	T	31-10-2019	IPR015255	Vitellinogen, open beta-sheet	GO:0005319|GO:0006869	Reactome: R-HSA-202733|Reactome: R-HSA-3000471|Reactome: R-HSA-3000480|Reactome: R-HSA-3000484|Reactome: R-HSA-3000497|Reactome: R-HSA-381426|Reactome: R-HSA-432142|Reactome: R-HSA-5686938|Reactome: R-HSA-8856825|Reactome: R-HSA-8856828|Reactome: R-HSA-8866423|Reactome: R-HSA-8957275|Reactome: R-HSA-8963888|Reactome: R-HSA-8963901|Reactome: R-HSA-8964026|Reactome: R-HSA-8964038|Reactome: R-HSA-89…
Mmel_00006843-RA	caa4cc6b610a6507847ba294a61bf8bd	1306	Pfam	PF06448	Domain of Unknown Function (DUF1081)	667	774	3.4e-06	T	31-10-2019	IPR009454	Lipid transport, open beta-sheet	GO:0005319|GO:0006869	Reactome: R-HSA-202733|Reactome: R-HSA-3000471|Reactome: R-HSA-3000480|Reactome: R-HSA-3000484|Reactome: R-HSA-3000497|Reactome: R-HSA-381426|Reactome: R-HSA-432142|Reactome: R-HSA-5686938|Reactome: R-HSA-8856825|Reactome: R-HSA-8856828|Reactome: R-HSA-8866423|Reactome: R-HSA-8957275|Reactome: R-HSA-8963888|Reactome: R-HSA-8963901|Reactome: R-HSA-8964026|Reactome: R-HSA-8964038|Reactome: R-HSA-89…
Mmel_00007400-RA	fec318c4f85359e8383c78c1be17c1fc	747	Pfam	PF02350	UDP-N-acetylglucosamine 2-epimerase	53	390	3e-67	T	31-10-2019	IPR003331	UDP-N-acetylglucosamine 2-epimerase domain		Reactome: R-HSA-4085001|Reactome: R-HSA-4085011
Mmel_00007400-RA	fec318c4f85359e8383c78c1be17c1fc	747	Pfam	PF00480	ROK family	425	729	1.1e-55	T	31-10-2019	IPR000600	ROK family		Reactome: R-HSA-4085001|Reactome: R-HSA-4085011
Mmel_00002602-RA	fe620c09543e2bb0fa1eeb3c859f73db	486	Pfam	PF09728	Myosin-like coiled-coil protein	102	408	2.6e-116	T	31-10-2019	IPR026183	Taxilin family	GO:0019905
Mmel_00010527-RA	579d2a5cb7b933e93021ef9637eb0acc	919	Pfam	PF16209	Phospholipid-translocating ATPase N-terminal	42	101	8.1e-17	T	31-10-2019	IPR032631	P-type ATPase, N-terminal		Reactome: R-HSA-936837
Mmel_00010527-RA	579d2a5cb7b933e93021ef9637eb0acc	919	Pfam	PF16212	Phospholipid-translocating P-type ATPase C-terminal	689	911	1.4e-39	T	31-10-2019	IPR032630	P-type ATPase, C-terminal		Reactome: R-HSA-936837
Mmel_00013217-RA	ee57e94c15fe1c7f894c4fbb4f1de1c0	622	Pfam	PF09422	WTX protein	252	429	1.2e-49	T	31-10-2019	IPR019003	APC membrane recruitment protein
Mmel_00013217-RA	ee57e94c15fe1c7f894c4fbb4f1de1c0	622	Pfam	PF09422	WTX protein	105	216	7.8e-12	T	31-10-2019	IPR019003	APC membrane recruitment protein
Mmel_00010999-RA	5097baa6fb4bf8839b9c1cc946a7c073	534	Pfam	PF07575	Nup85 Nucleoporin	41	489	5.6e-152	T	31-10-2019	IPR011502	Nucleoporin Nup85-like		Reactome: R-HSA-1169408|Reactome: R-HSA-141444|Reactome: R-HSA-159227|Reactome: R-HSA-159230|Reactome: R-HSA-159231|Reactome: R-HSA-159236|Reactome: R-HSA-165054|Reactome: R-HSA-168271|Reactome: R-HSA-168276|Reactome: R-HSA-168325|Reactome: R-HSA-168333|Reactome: R-HSA-170822|Reactome: R-HSA-180746|Reactome: R-HSA-180910|Reactome: R-HSA-191859|Reactome: R-HSA-2467813|Reactome: R-HSA-2500257|React…
Mmel_00006750-RA	0ed7b40c81a1c88ce3c82159dbd689a0	277	Pfam	PF00231	ATP synthase	11	272	6.3e-76	T	31-10-2019	IPR000131	ATP synthase, F1 complex, gamma subunit	GO:0015986|GO:0045261|GO:0046933	Reactome: R-HSA-163210|Reactome: R-HSA-8949613
Mmel_00006107-RA	68c2276700fa65643e0f6cc4cf235ab9	632	Pfam	PF00067	Cytochrome P450	30	446	3.7e-56	T	31-10-2019	IPR001128	Cytochrome P450	GO:0005506|GO:0016705|GO:0020037|GO:0055114
Mmel_00012721-RA	b10ee2d19cab4f901124de80ddcc5ebe	564	Pfam	PF12698	ABC-2 family transporter protein	37	420	2.5e-31	T	31-10-2019
Mmel_00012721-RA	b10ee2d19cab4f901124de80ddcc5ebe	564	Pfam	PF00005	ABC transporter	502	542	1.6e-09	T	31-10-2019	IPR003439	ABC transporter-like	GO:0005524|GO:0016887
Mmel_00009942-RA	60a1ce940eb7f9569fc8bfe5a5dbccbe	545	Pfam	PF15706	Mature oligodendrocyte transmembrane protein, TMEM132D, C-term	340	419	1.1e-33	T	31-10-2019	IPR031436	Transmembrane protein TMEM132, C-terminal
Mmel_00009942-RA	60a1ce940eb7f9569fc8bfe5a5dbccbe	545	Pfam	PF16070	Transmembrane protein family 132	98	235	4.4e-47	T	31-10-2019	IPR031437	Transmembrane protein family 132, middle domain
Mmel_00009942-RA	60a1ce940eb7f9569fc8bfe5a5dbccbe	545	Pfam	PF16070	Transmembrane protein family 132	2	98	1e-40	T	31-10-2019	IPR031437	Transmembrane protein family 132, middle domain
Mmel_00000941-RA	de9b170b582ee5fd3cc2cd1342cdd06d	972	Pfam	PF11830	Domain of unknown function (DUF3350)	613	676	4.5e-29	T	31-10-2019	IPR021785	Domain of unknown function DUF3350		Reactome: R-HSA-1445148
Mmel_00000941-RA	de9b170b582ee5fd3cc2cd1342cdd06d	972	Pfam	PF00566	Rab-GTPase-TBC domain	782	850	1.3e-12	T	31-10-2019	IPR000195	Rab-GTPase-TBC domain
Mmel_00000941-RA	de9b170b582ee5fd3cc2cd1342cdd06d	972	Pfam	PF00640	Phosphotyrosine interaction domain (PTB/PID)	218	315	6.6e-07	T	31-10-2019	IPR006020	PTB/PI domain	GO:0005515
Mmel_00003308-RA	1a12e69f6f4ee167fb422e25f27a1c20	448	Pfam	PF04055	Radical SAM superfamily	166	296	7.1e-15	T	31-10-2019	IPR007197	Radical SAM	GO:0003824|GO:0051536
Mmel_00003308-RA	1a12e69f6f4ee167fb422e25f27a1c20	448	Pfam	PF13353	4Fe-4S single cluster domain	164	251	6.7e-07	T	31-10-2019
Mmel_00003427-RA	45bff12fc258abec5f6589cf5d9857fb	825	Pfam	PF00651	BTB/POZ domain	50	154	2.1e-27	T	31-10-2019	IPR000210	BTB/POZ domain	GO:0005515
Mmel_00003427-RA	45bff12fc258abec5f6589cf5d9857fb	825	Pfam	PF00096	Zinc finger, C2H2 type	352	374	7.5e-05	T	31-10-2019
Mmel_00003427-RA	45bff12fc258abec5f6589cf5d9857fb	825	Pfam	PF00096	Zinc finger, C2H2 type	408	430	0.00031	T	31-10-2019
Mmel_00003427-RA	45bff12fc258abec5f6589cf5d9857fb	825	Pfam	PF00096	Zinc finger, C2H2 type	325	346	0.00045	T	31-10-2019
Mmel_00003427-RA	45bff12fc258abec5f6589cf5d9857fb	825	Pfam	PF00096	Zinc finger, C2H2 type	464	486	4.6e-07	T	31-10-2019
Mmel_00003427-RA	45bff12fc258abec5f6589cf5d9857fb	825	Pfam	PF00096	Zinc finger, C2H2 type	492	510	0.015	T	31-10-2019
Mmel_00003427-RA	45bff12fc258abec5f6589cf5d9857fb	825	Pfam	PF00096	Zinc finger, C2H2 type	437	458	0.0061	T	31-10-2019
Mmel_00003427-RA	45bff12fc258abec5f6589cf5d9857fb	825	Pfam	PF00096	Zinc finger, C2H2 type	380	402	0.0026	T	31-10-2019
Mmel_00003427-RA	45bff12fc258abec5f6589cf5d9857fb	825	Pfam	PF13912	C2H2-type zinc finger	520	544	0.00043	T	31-10-2019
Mmel_00005540-RA	4bb73a3242ea787f695aecc48529c376	647	Pfam	PF00271	Helicase conserved C-terminal domain	315	423	1.9e-30	T	31-10-2019	IPR001650	Helicase, C-terminal
Mmel_00005540-RA	4bb73a3242ea787f695aecc48529c376	647	Pfam	PF00270	DEAD/DEAH box helicase	106	276	3.3e-49	T	31-10-2019	IPR011545	DEAD/DEAH box helicase domain	GO:0003676|GO:0005524
Mmel_00004923-RA	c5488171a0ede9a01a4f95d7198ffee6	125	Pfam	PF06388	Protein of unknown function (DUF1075)	2	122	6.7e-49	T	31-10-2019	IPR009432	Protein of unknown function DUF1075
Mmel_00013144-RA	cfbdb4aaad7c7afc1a0c7d5a72b45144	582	Pfam	PF15293	Nuclear fragile X mental retardation-interacting protein 2	1	582	6.8e-292	T	31-10-2019	IPR032747	Nuclear fragile X mental retardation-interacting protein 2	GO:0003723
Mmel_00011284-RA	4c5f0d5f12a8ff67cc4b096bb2b23643	1372	Pfam	PF01612	3'-5' exonuclease	59	229	1.5e-29	T	31-10-2019	IPR002562	3'-5' exonuclease domain	GO:0003676|GO:0006139|GO:0008408
Mmel_00011284-RA	4c5f0d5f12a8ff67cc4b096bb2b23643	1372	Pfam	PF14493	Helix-turn-helix domain	1145	1238	8.2e-10	T	31-10-2019	IPR029491	Helicase Helix-turn-helix domain		Reactome: R-HSA-3108214|Reactome: R-HSA-5685938|Reactome: R-HSA-5685942|Reactome: R-HSA-5693554|Reactome: R-HSA-5693568|Reactome: R-HSA-5693579|Reactome: R-HSA-5693607|Reactome: R-HSA-5693616|Reactome: R-HSA-6804756|Reactome: R-HSA-69473
Mmel_00011284-RA	4c5f0d5f12a8ff67cc4b096bb2b23643	1372	Pfam	PF00270	DEAD/DEAH box helicase	511	669	3.6e-14	T	31-10-2019	IPR011545	DEAD/DEAH box helicase domain	GO:0003676|GO:0005524
Mmel_00011284-RA	4c5f0d5f12a8ff67cc4b096bb2b23643	1372	Pfam	PF09382	RQC domain	919	1016	6e-17	T	31-10-2019	IPR018982	RQC domain	GO:0006260|GO:0006281|GO:0043140	Reactome: R-HSA-3108214|Reactome: R-HSA-5685938|Reactome: R-HSA-5685942|Reactome: R-HSA-5693554|Reactome: R-HSA-5693568|Reactome: R-HSA-5693579|Reactome: R-HSA-5693607|Reactome: R-HSA-5693616|Reactome: R-HSA-6804756|Reactome: R-HSA-69473
Mmel_00011284-RA	4c5f0d5f12a8ff67cc4b096bb2b23643	1372	Pfam	PF00271	Helicase conserved C-terminal domain	725	820	4.3e-17	T	31-10-2019	IPR001650	Helicase, C-terminal
Mmel_00011284-RA	4c5f0d5f12a8ff67cc4b096bb2b23643	1372	Pfam	PF16124	RecQ zinc-binding	834	902	1.3e-07	T	31-10-2019	IPR032284	ATP-dependent DNA helicase RecQ, zinc-binding domain
Mmel_00003675-RA	ce3036a39805f358f4322d9c6312d9ee	159	Pfam	PF13917	Zinc knuckle	9	32	2.6e-07	T	31-10-2019
Mmel_00010468-RA	75c3adcd6f7a72e016da05501cf8cd5c	299	Pfam	PF07686	Immunoglobulin V-set domain	22	114	4e-10	T	31-10-2019	IPR013106	Immunoglobulin V-set domain
Mmel_00010468-RA	75c3adcd6f7a72e016da05501cf8cd5c	299	Pfam	PF08205	CD80-like C2-set immunoglobulin domain	123	197	1.5e-06	T	31-10-2019	IPR013162	CD80-like, immunoglobulin C2-set
Mmel_00012173-RA	85d4fede973fb931ba6890eac8fe72ed	718	Pfam	PF09258	Glycosyl transferase family 64 domain	658	712	3.4e-10	T	31-10-2019	IPR015338	Exostosin , C-terminal	GO:0016021|GO:0016757
Mmel_00012173-RA	85d4fede973fb931ba6890eac8fe72ed	718	Pfam	PF03016	Exostosin family	187	495	5.9e-56	T	31-10-2019	IPR004263	Exostosin-like	GO:0006486|GO:0016757
Mmel_00012478-RA	91cb17cc4f6c0744aca144ba9274d5f9	448	Pfam	PF07946	Protein of unknown function (DUF1682)	134	439	4e-67	T	31-10-2019	IPR012879	Protein of unknown function DUF1682
Mmel_00009841-RA	39cf1e4738603179237c3b428c2c3f54	1612	Pfam	PF01835	MG2 domain	105	197	4.3e-21	T	31-10-2019	IPR002890	Alpha-2-macroglobulin, N-terminal	GO:0004866
Mmel_00009841-RA	39cf1e4738603179237c3b428c2c3f54	1612	Pfam	PF00207	Alpha-2-macroglobulin family	713	803	3.4e-27	T	31-10-2019	IPR001599	Alpha-2-macroglobulin	GO:0004866
Mmel_00009841-RA	39cf1e4738603179237c3b428c2c3f54	1612	Pfam	PF10569	Alpha-macro-globulin thiol-ester bond-forming region	934	963	4.1e-16	T	31-10-2019	IPR019565	Alpha-2-macroglobulin, thiol-ester bond-forming
Mmel_00009841-RA	39cf1e4738603179237c3b428c2c3f54	1612	Pfam	PF07678	A-macroglobulin complement component	984	1230	4.5e-85	T	31-10-2019	IPR011626	Alpha-macroglobulin complement component	GO:0005615
Mmel_00009841-RA	39cf1e4738603179237c3b428c2c3f54	1612	Pfam	PF07703	Alpha-2-macroglobulin family N-terminal region	433	578	1e-28	T	31-10-2019	IPR011625	Alpha-2-macroglobulin, N-terminal 2
Mmel_00009841-RA	39cf1e4738603179237c3b428c2c3f54	1612	Pfam	PF07677	A-macroglobulin receptor	1339	1427	1.2e-25	T	31-10-2019	IPR009048	Alpha-macroglobulin, receptor-binding	GO:0005576
Mmel_00010919-RA	2df4d2f1630300bbe9b5d503bbb06be0	1436	Pfam	PF13445	RING-type zinc-finger	14	44	8.7e-06	T	31-10-2019	IPR027370	RING-type zinc-finger, LisH dimerisation motif
Mmel_00010919-RA	2df4d2f1630300bbe9b5d503bbb06be0	1436	Pfam	PF00642	Zinc finger C-x8-C-x5-C-x3-H type (and similar)	411	437	2.2e-06	T	31-10-2019	IPR000571	Zinc finger, CCCH-type	GO:0046872
Mmel_00010919-RA	2df4d2f1630300bbe9b5d503bbb06be0	1436	Pfam	PF02114	Phosducin	1176	1434	3.5e-134	T	31-10-2019	IPR024253	Phosducin, thioredoxin-like domain
Mmel_00011691-RA	7e4dc6f2fe6ab744edeed93220c9f254	154	Pfam	PF07970	Endoplasmic reticulum vesicle transporter	1	134	2e-48	T	31-10-2019	IPR012936	Endoplasmic reticulum vesicle transporter, C-terminal
Mmel_00004346-RA	bdfb3ea40927ac92bd7e9360a4249113	811	Pfam	PF00989	PAS fold	63	131	1.2e-11	T	31-10-2019	IPR013767	PAS fold	GO:0006355
Mmel_00004346-RA	bdfb3ea40927ac92bd7e9360a4249113	811	Pfam	PF08447	PAS fold	248	330	8.1e-13	T	31-10-2019	IPR013655	PAS fold-3	GO:0005515
Mmel_00010447-RA	1977152dcd80d8d3ef270c96ac28f820	200	Pfam	PF05805	L6 membrane protein	1	189	2.1e-76	T	31-10-2019	IPR008661	L6 membrane	GO:0016021
Mmel_00007990-RA	03fb734e9ba0ff3135f340ecda945905	210	Pfam	PF00069	Protein kinase domain	31	209	2e-51	T	31-10-2019	IPR000719	Protein kinase domain	GO:0004672|GO:0005524|GO:0006468
Mmel_00006477-RA	7a532eb04801ea4e9bb0a49c62c567e6	529	Pfam	PF07714	Protein tyrosine kinase	98	177	5e-16	T	31-10-2019	IPR001245	Serine-threonine/tyrosine-protein kinase, catalytic domain	GO:0004672|GO:0006468
Mmel_00006477-RA	7a532eb04801ea4e9bb0a49c62c567e6	529	Pfam	PF07714	Protein tyrosine kinase	19	96	1.7e-16	T	31-10-2019	IPR001245	Serine-threonine/tyrosine-protein kinase, catalytic domain	GO:0004672|GO:0006468
Mmel_00014324-RA	1e7b68c30c5bfde63c4553b445a6041a	105	Pfam	PF05825	Beta-microseminoprotein (PSP-94)	40	104	1.1e-08	T	31-10-2019	IPR008735	Beta-microseminoprotein
Mmel_00009353-RA	654b394328a5b68d38598c36bbf24c25	290	Pfam	PF03619	Organic solute transporter Ostalpha	87	199	1.2e-35	T	31-10-2019	IPR005178	Organic solute transporter subunit alpha/Transmembrane protein 184
Mmel_00009353-RA	654b394328a5b68d38598c36bbf24c25	290	Pfam	PF03619	Organic solute transporter Ostalpha	21	77	1.8e-08	T	31-10-2019	IPR005178	Organic solute transporter subunit alpha/Transmembrane protein 184
Mmel_00009349-RA	6b637497df8c9dd3564058cf4d1562fe	869	Pfam	PF12130	Protein of unknown function (DUF3585)	583	714	1.6e-40	T	31-10-2019	IPR022735	bMERB domain
Mmel_00009349-RA	6b637497df8c9dd3564058cf4d1562fe	869	Pfam	PF00307	Calponin homology (CH) domain	36	88	2.8e-07	T	31-10-2019	IPR001715	Calponin homology domain	GO:0005515
Mmel_00009349-RA	6b637497df8c9dd3564058cf4d1562fe	869	Pfam	PF00412	LIM domain	161	213	8.3e-06	T	31-10-2019	IPR001781	Zinc finger, LIM-type
Mmel_00011173-RA	47928db87f232401a08cf456c3945d04	146	Pfam	PF16422	Transcription factor COE1 DNA-binding domain	4	143	5.4e-93	T	31-10-2019	IPR032200	Transcription factor COE, DNA-binding domain	GO:0003677
Mmel_00010194-RA	adee892023e0a2e28aedda6bf0320d8d	283	Pfam	PF01151	GNS1/SUR4 family	11	245	8.8e-65	T	31-10-2019	IPR002076	ELO family	GO:0016021	KEGG: 00062+2.3.1.199|MetaCyc: PWY-5080|MetaCyc: PWY-5972|MetaCyc: PWY-6433|MetaCyc: PWY-6598|MetaCyc: PWY-7036|MetaCyc: PWY-7601|MetaCyc: PWY-7602|MetaCyc: PWY-7619|MetaCyc: PWY-7724|MetaCyc: PWY-7725|Reactome: R-HSA-75876
Mmel_00005336-RA	4b04df680cf23936a02482dbf7ff9c1b	335	Pfam	PF00007	Cystine-knot domain	246	325	5e-09	T	31-10-2019	IPR006208	Glycoprotein hormone subunit beta
Mmel_00005336-RA	4b04df680cf23936a02482dbf7ff9c1b	335	Pfam	PF00219	Insulin-like growth factor binding protein	18	70	8.1e-11	T	31-10-2019	IPR000867	Insulin-like growth factor-binding protein, IGFBP	GO:0001558|GO:0005520|GO:0005576
Mmel_00005336-RA	4b04df680cf23936a02482dbf7ff9c1b	335	Pfam	PF00093	von Willebrand factor type C domain	92	154	1.8e-08	T	31-10-2019	IPR001007	VWFC domain	GO:0005515
Mmel_00005336-RA	4b04df680cf23936a02482dbf7ff9c1b	335	Pfam	PF00090	Thrombospondin type 1 domain	187	227	2.5e-07	T	31-10-2019	IPR000884	Thrombospondin type-1 (TSP1) repeat
Mmel_00010179-RA	70593c5fd0474bbba959367b43f71e48	406	Pfam	PF13894	C2H2-type zinc finger	316	338	0.0015	T	31-10-2019
Mmel_00010179-RA	70593c5fd0474bbba959367b43f71e48	406	Pfam	PF13909	C2H2-type zinc-finger domain	40	65	1.5e-08	T	31-10-2019
Mmel_00007880-RA	34d0e2122794c3419f827bfb5b66941c	570	Pfam	PF00059	Lectin C-type domain	107	239	4.4e-17	T	31-10-2019	IPR001304	C-type lectin-like
Mmel_00007880-RA	34d0e2122794c3419f827bfb5b66941c	570	Pfam	PF00057	Low-density lipoprotein receptor domain class A	4	41	1.6e-11	T	31-10-2019	IPR002172	Low-density lipoprotein (LDL) receptor class A repeat	GO:0005515
Mmel_00008233-RA	b1efde7b791ea2565682b2efe4d50d4a	891	Pfam	PF07648	Kazal-type serine protease inhibitor domain	652	697	2.2e-11	T	31-10-2019	IPR002350	Kazal domain	GO:0005515
Mmel_00008233-RA	b1efde7b791ea2565682b2efe4d50d4a	891	Pfam	PF03137	Organic Anion Transporter Polypeptide (OATP) family	220	753	6.7e-145	T	31-10-2019	IPR004156	Organic anion transporter polypeptide	GO:0005215|GO:0016020|GO:0055085
Mmel_00008233-RA	b1efde7b791ea2565682b2efe4d50d4a	891	Pfam	PF03137	Organic Anion Transporter Polypeptide (OATP) family	768	835	1.7e-21	T	31-10-2019	IPR004156	Organic anion transporter polypeptide	GO:0005215|GO:0016020|GO:0055085
Mmel_00013321-RA	c5ef75ca1c1d66fe615e07e67ef5f9ab	130	Pfam	PF07714	Protein tyrosine kinase	17	111	4.4e-37	T	31-10-2019	IPR001245	Serine-threonine/tyrosine-protein kinase, catalytic domain	GO:0004672|GO:0006468
Mmel_00008355-RA	90d686da2a5fa05eef9c88e102520e9e	1679	Pfam	PF01477	PLAT/LH2 domain	928	1044	4e-25	T	31-10-2019	IPR001024	PLAT/LH2 domain	GO:0005515
Mmel_00008355-RA	90d686da2a5fa05eef9c88e102520e9e	1679	Pfam	PF01477	PLAT/LH2 domain	795	875	1.1e-14	T	31-10-2019	IPR001024	PLAT/LH2 domain	GO:0005515
Mmel_00008355-RA	90d686da2a5fa05eef9c88e102520e9e	1679	Pfam	PF01477	PLAT/LH2 domain	3	108	1.4e-20	T	31-10-2019	IPR001024	PLAT/LH2 domain	GO:0005515
Mmel_00008355-RA	90d686da2a5fa05eef9c88e102520e9e	1679	Pfam	PF01477	PLAT/LH2 domain	1454	1560	4.9e-21	T	31-10-2019	IPR001024	PLAT/LH2 domain	GO:0005515
Mmel_00008355-RA	90d686da2a5fa05eef9c88e102520e9e	1679	Pfam	PF01477	PLAT/LH2 domain	384	494	6.4e-17	T	31-10-2019	IPR001024	PLAT/LH2 domain	GO:0005515
Mmel_00008355-RA	90d686da2a5fa05eef9c88e102520e9e	1679	Pfam	PF01477	PLAT/LH2 domain	1582	1656	5.8e-12	T	31-10-2019	IPR001024	PLAT/LH2 domain	GO:0005515
Mmel_00008355-RA	90d686da2a5fa05eef9c88e102520e9e	1679	Pfam	PF01477	PLAT/LH2 domain	127	231	1.7e-16	T	31-10-2019	IPR001024	PLAT/LH2 domain	GO:0005515
Mmel_00008355-RA	90d686da2a5fa05eef9c88e102520e9e	1679	Pfam	PF01477	PLAT/LH2 domain	1222	1335	1.9e-25	T	31-10-2019	IPR001024	PLAT/LH2 domain	GO:0005515
Mmel_00008355-RA	90d686da2a5fa05eef9c88e102520e9e	1679	Pfam	PF01477	PLAT/LH2 domain	515	624	1.9e-17	T	31-10-2019	IPR001024	PLAT/LH2 domain	GO:0005515
Mmel_00008355-RA	90d686da2a5fa05eef9c88e102520e9e	1679	Pfam	PF01477	PLAT/LH2 domain	645	731	1e-17	T	31-10-2019	IPR001024	PLAT/LH2 domain	GO:0005515
Mmel_00008355-RA	90d686da2a5fa05eef9c88e102520e9e	1679	Pfam	PF01477	PLAT/LH2 domain	257	357	7.8e-19	T	31-10-2019	IPR001024	PLAT/LH2 domain	GO:0005515
Mmel_00008355-RA	90d686da2a5fa05eef9c88e102520e9e	1679	Pfam	PF01477	PLAT/LH2 domain	1059	1186	6.3e-13	T	31-10-2019	IPR001024	PLAT/LH2 domain	GO:0005515
Mmel_00013708-RA	e751175982db65ffb692f3a2f559631e	102	Pfam	PF02422	Keratin	3	95	3.2e-37	T	31-10-2019	IPR003461	Keratin	GO:0005200|GO:0005882
Mmel_00011614-RA	6986718c7250cc5fad638f734facbd3b	726	Pfam	PF00607	gag gene protein p24 (core nucleocapsid protein)	371	576	3.9e-34	T	31-10-2019	IPR000721	Retroviral nucleocapsid protein Gag	GO:0016032
Mmel_00014054-RA	1ceee17a8e56201625238748cd73c1de	797	Pfam	PF16726	Inositol polyphosphate 5-phosphatase clathrin binding domain	1	49	1.9e-18	T	31-10-2019	IPR031995	Inositol polyphosphate 5-phosphatase, clathrin binding domain		KEGG: 00562+3.1.3.36|KEGG: 04070+3.1.3.36|MetaCyc: PWY-6368|Reactome: R-HSA-1660499|Reactome: R-HSA-1660514|Reactome: R-HSA-1855183|Reactome: R-HSA-1855204|Reactome: R-HSA-194840|Reactome: R-HSA-432722|Reactome: R-HSA-8856828
Mmel_00014054-RA	1ceee17a8e56201625238748cd73c1de	797	Pfam	PF00620	RhoGAP domain	631	770	2.1e-25	T	31-10-2019	IPR000198	Rho GTPase-activating protein domain	GO:0007165	Reactome: R-HSA-194840
Mmel_00011728-RA	f9c39690be76e89340818133770e9e02	186	Pfam	PF00084	Sushi repeat (SCR repeat)	115	172	6.5e-05	T	31-10-2019	IPR000436	Sushi/SCR/CCP domain
Mmel_00011728-RA	f9c39690be76e89340818133770e9e02	186	Pfam	PF00431	CUB domain	2	107	5.8e-27	T	31-10-2019	IPR000859	CUB domain
Mmel_00010554-RA	d3548557e0aa9969798a6f97b3fa7a25	196	Pfam	PF08320	PIG-X / PBN1	12	187	8.5e-35	T	31-10-2019	IPR013233	Glycosylphosphatidylinositol-mannosyltransferase I, PIG-X/PBN1	GO:0005789|GO:0006506	Reactome: R-HSA-162710
Mmel_00013857-RA	e428a78bb5f1b58acc02ebe1bda930bd	496	Pfam	PF00069	Protein kinase domain	89	374	4.5e-72	T	31-10-2019	IPR000719	Protein kinase domain	GO:0004672|GO:0005524|GO:0006468
Mmel_00006730-RA	8585e534e36f223d16ef3e9d05dacaad	327	Pfam	PF10516	SHNi-TPR	106	143	3.3e-15	T	31-10-2019	IPR019544	Tetratricopeptide, SHNi-TPR domain
Mmel_00005712-RA	318bcae56e69cd67aabc18aa6f32c7ef	764	Pfam	PF13718	GNAT acetyltransferase 2	315	490	5.2e-72	T	31-10-2019	IPR000182	GNAT domain
Mmel_00005712-RA	318bcae56e69cd67aabc18aa6f32c7ef	764	Pfam	PF08351	Domain of unknown function (DUF1726)	65	158	1.2e-33	T	31-10-2019	IPR013562	tRNA(Met) cytidine acetyltransferase TmcA, N-terminal		Reactome: R-HSA-6790901
Mmel_00005712-RA	318bcae56e69cd67aabc18aa6f32c7ef	764	Pfam	PF13725	Possible tRNA binding domain	500	720	2.9e-79	T	31-10-2019	IPR027992	Possible tRNA binding domain		Reactome: R-HSA-6790901
Mmel_00014298-RA	9b7e110ec7fc1ce0a6f4dcff318b1d91	247	Pfam	PF01404	Ephrin receptor ligand binding domain	1	174	1.2e-73	T	31-10-2019	IPR001090	Ephrin receptor ligand binding domain	GO:0005515	Reactome: R-HSA-2682334|Reactome: R-HSA-3928665
Mmel_00005616-RA	94f4f79818605df9db55503b9c746421	139	Pfam	PF15475	Transmembrane protein C12orf23, UPF0444	48	138	1.5e-44	T	31-10-2019	IPR028153	Transmembrane protein C12orf23, UPF0444
Mmel_00014254-RA	0a04e6d37402c383dc2dfc73040474f7	170	Pfam	PF13499	EF-hand domain pair	87	156	2.8e-12	T	31-10-2019	IPR002048	EF-hand domain	GO:0005509
Mmel_00015023-RA	79fa95e5bd4b589d7e97481a7324fd43	91	Pfam	PF01849	NAC domain	1	49	1.4e-20	T	31-10-2019	IPR002715	Nascent polypeptide-associated complex NAC domain
Mmel_00000841-RA	44eb9ffb2a9bb698b401a4eef2397c77	623	Pfam	PF07707	BTB And C-terminal Kelch	133	227	5e-28	T	31-10-2019	IPR011705	BTB/Kelch-associated
Mmel_00000841-RA	44eb9ffb2a9bb698b401a4eef2397c77	623	Pfam	PF00651	BTB/POZ domain	25	127	2.7e-27	T	31-10-2019	IPR000210	BTB/POZ domain	GO:0005515
Mmel_00000841-RA	44eb9ffb2a9bb698b401a4eef2397c77	623	Pfam	PF01344	Kelch motif	373	416	2.2e-09	T	31-10-2019	IPR006652	Kelch repeat type 1	GO:0005515
Mmel_00002541-RA	672242cc0027fb9a75211944ffb05810	438	Pfam	PF00431	CUB domain	295	404	1.2e-29	T	31-10-2019	IPR000859	CUB domain
Mmel_00002541-RA	672242cc0027fb9a75211944ffb05810	438	Pfam	PF01400	Astacin (Peptidase family M12A)	113	293	9.3e-60	T	31-10-2019	IPR001506	Peptidase M12A	GO:0004222|GO:0006508
Mmel_00006856-RA	b9f4df2f32786a94d9aeea3abe88cd67	1067	Pfam	PF14533	Ubiquitin-specific protease C-terminal	840	1051	1.4e-62	T	31-10-2019	IPR029346	Ubiquitin carboxyl-terminal hydrolase, C-terminal		Reactome: R-HSA-5689880
Mmel_00006856-RA	b9f4df2f32786a94d9aeea3abe88cd67	1067	Pfam	PF00443	Ubiquitin carboxyl-terminal hydrolase	190	494	1.1e-49	T	31-10-2019	IPR001394	Peptidase C19, ubiquitin carboxyl-terminal hydrolase	GO:0016579|GO:0036459
Mmel_00006856-RA	b9f4df2f32786a94d9aeea3abe88cd67	1067	Pfam	PF12436	ICP0-binding domain of Ubiquitin-specific protease 7	596	830	2.8e-65	T	31-10-2019	IPR024729	Ubiquitin carboxyl-terminal hydrolase 7, ICP0-binding domain		Reactome: R-HSA-5689880|Reactome: R-HSA-6781823|Reactome: R-HSA-6781827|Reactome: R-HSA-6782135|Reactome: R-HSA-6782210|Reactome: R-HSA-6804757|Reactome: R-HSA-8866652|Reactome: R-HSA-8948747
Mmel_00006856-RA	b9f4df2f32786a94d9aeea3abe88cd67	1067	Pfam	PF00917	MATH domain	54	171	1.2e-14	T	31-10-2019	IPR002083	MATH/TRAF domain	GO:0005515
Mmel_00004538-RA	498e24eb961c0e0099b4625c3855f377	133	Pfam	PF15475	Transmembrane protein C12orf23, UPF0444	42	132	5.6e-45	T	31-10-2019	IPR028153	Transmembrane protein C12orf23, UPF0444
Mmel_00001276-RA	0291448ce3cc9ae28132df6582cddab2	592	Pfam	PF02366	Dolichyl-phosphate-mannose-protein mannosyltransferase	2	244	8.9e-77	T	31-10-2019	IPR003342	Glycosyl transferase family 39/83	GO:0000030|GO:0006493|GO:0016020	Reactome: R-HSA-5173105
Mmel_00001276-RA	0291448ce3cc9ae28132df6582cddab2	592	Pfam	PF16192	C-terminal four TMM region of protein-O-mannosyltransferase	414	590	2.6e-44	T	31-10-2019	IPR032421	Protein O-mannosyl-transferase, C-terminal four TM domain		KEGG: 00514+2.4.1.109|KEGG: 00515+2.4.1.109|MetaCyc: PWY-7921|MetaCyc: PWY-7922|Reactome: R-HSA-5173105
Mmel_00000489-RA	628f6e429b310115e7f79d653053751a	355	Pfam	PF08558	Telomere repeat binding factor (TRF)	39	223	1e-20	T	31-10-2019	IPR013867	Telomere repeat-binding factor, dimerisation domain	GO:0042162|GO:0042803	Reactome: R-HSA-1221632|Reactome: R-HSA-171306|Reactome: R-HSA-2559586
Mmel_00000489-RA	628f6e429b310115e7f79d653053751a	355	Pfam	PF00249	Myb-like DNA-binding domain	306	349	2.8e-07	T	31-10-2019	IPR001005	SANT/Myb domain
Mmel_00005860-RA	90023960375cffb1aa45aa0ec8ab1ce4	1461	Pfam	PF00002	7 transmembrane receptor (Secretin family)	936	1102	2.3e-39	T	31-10-2019	IPR000832	GPCR, family 2, secretin-like	GO:0004930|GO:0007186|GO:0016021
Mmel_00005860-RA	90023960375cffb1aa45aa0ec8ab1ce4	1461	Pfam	PF00008	EGF-like domain	130	160	3e-07	T	31-10-2019	IPR000742	EGF-like domain
Mmel_00005860-RA	90023960375cffb1aa45aa0ec8ab1ce4	1461	Pfam	PF02210	Laminin G domain	196	325	7.3e-17	T	31-10-2019	IPR001791	Laminin G domain
Mmel_00005860-RA	90023960375cffb1aa45aa0ec8ab1ce4	1461	Pfam	PF02210	Laminin G domain	31	105	2.2e-06	T	31-10-2019	IPR001791	Laminin G domain
Mmel_00005860-RA	90023960375cffb1aa45aa0ec8ab1ce4	1461	Pfam	PF16489	GPCR-Autoproteolysis INducing (GAIN) domain	609	857	9.5e-69	T	31-10-2019	IPR032471	GAIN domain, N-terminal
Mmel_00005860-RA	90023960375cffb1aa45aa0ec8ab1ce4	1461	Pfam	PF01825	GPCR proteolysis site, GPS, motif	885	930	7.1e-14	T	31-10-2019	IPR000203	GPS motif
Mmel_00005860-RA	90023960375cffb1aa45aa0ec8ab1ce4	1461	Pfam	PF00053	Laminin EGF domain	480	519	1.2e-08	T	31-10-2019	IPR002049	Laminin EGF domain
Mmel_00013541-RA	41b68a5f92e2601c2ff6d90016cfcb53	116	Pfam	PF12717	non-SMC mitotic condensation complex subunit 1	52	114	1.2e-26	T	31-10-2019	IPR032682	Condensin complex subunit 1, C-terminal
Mmel_00002118-RA	0412693c31162e3521cfaa05eef5385d	861	Pfam	PF04617	Hox9 activation region	312	467	1.3e-38	T	31-10-2019	IPR006711	Hox9, N-terminal activation domain	GO:0005634|GO:0006351
Mmel_00002118-RA	0412693c31162e3521cfaa05eef5385d	861	Pfam	PF00046	Homeobox domain	280	315	3e-06	T	31-10-2019	IPR001356	Homeobox domain	GO:0003677
Mmel_00002118-RA	0412693c31162e3521cfaa05eef5385d	861	Pfam	PF00046	Homeobox domain	769	825	4.1e-20	T	31-10-2019	IPR001356	Homeobox domain	GO:0003677
Mmel_00002118-RA	0412693c31162e3521cfaa05eef5385d	861	Pfam	PF00046	Homeobox domain	484	529	2.2e-10	T	31-10-2019	IPR001356	Homeobox domain	GO:0003677
Mmel_00010614-RA	7178701224d2f035f3d980f847d732d2	2440	Pfam	PF04118	Dopey, N-terminal	19	252	1.9e-80	T	31-10-2019	IPR007249	Dopey, N-terminal
Mmel_00010614-RA	7178701224d2f035f3d980f847d732d2	2440	Pfam	PF04118	Dopey, N-terminal	252	287	1.8e-08	T	31-10-2019	IPR007249	Dopey, N-terminal
Mmel_00010041-RA	85320ba3a513a2a9037b66d6e7e0d340	547	Pfam	PF03281	Mab-21 protein	388	491	5.7e-10	T	31-10-2019	IPR024810	Mab-21 domain
Mmel_00003481-RA	5890715ef4f84087718c0cb77753f089	393	Pfam	PF03508	Gap junction alpha-1 protein (Cx43)	304	323	9.7e-11	T	31-10-2019	IPR013124	Gap junction alpha-1 protein (Cx43), C-terminal		Reactome: R-HSA-190704|Reactome: R-HSA-190827|Reactome: R-HSA-190840|Reactome: R-HSA-190861|Reactome: R-HSA-190873|Reactome: R-HSA-191647|Reactome: R-HSA-196025
Mmel_00003481-RA	5890715ef4f84087718c0cb77753f089	393	Pfam	PF00029	Connexin	15	244	1.5e-92	T	31-10-2019	IPR013092	Connexin, N-terminal		Reactome: R-HSA-190861
Mmel_00010491-RA	c961dc376881ecff283d961fdda49190	831	Pfam	PF00443	Ubiquitin carboxyl-terminal hydrolase	207	826	1.1e-46	T	31-10-2019	IPR001394	Peptidase C19, ubiquitin carboxyl-terminal hydrolase	GO:0016579|GO:0036459
Mmel_00010491-RA	c961dc376881ecff283d961fdda49190	831	Pfam	PF02148	Zn-finger in ubiquitin-hydrolases and other protein	76	151	4.8e-18	T	31-10-2019	IPR001607	Zinc finger, UBP-type	GO:0008270
Mmel_00008317-RA	2b032a7b17fb8651c24e6e8b250e0bc4	509	Pfam	PF00595	PDZ domain (Also known as DHR or GLGF)	263	339	1.7e-13	T	31-10-2019	IPR001478	PDZ domain	GO:0005515
Mmel_00008317-RA	2b032a7b17fb8651c24e6e8b250e0bc4	509	Pfam	PF00595	PDZ domain (Also known as DHR or GLGF)	388	466	5.9e-14	T	31-10-2019	IPR001478	PDZ domain	GO:0005515
Mmel_00008317-RA	2b032a7b17fb8651c24e6e8b250e0bc4	509	Pfam	PF00595	PDZ domain (Also known as DHR or GLGF)	155	235	4.5e-11	T	31-10-2019	IPR001478	PDZ domain	GO:0005515
Mmel_00011267-RA	decf1e32cac262b270344639b2af01a7	590	Pfam	PF05383	La domain	40	97	1.8e-20	T	31-10-2019	IPR006630	La-type HTH domain
Mmel_00011267-RA	decf1e32cac262b270344639b2af01a7	590	Pfam	PF08777	RNA binding motif	462	560	2.8e-29	T	31-10-2019	IPR014886	La protein, RNA-binding domain	GO:0003723
Mmel_00011267-RA	decf1e32cac262b270344639b2af01a7	590	Pfam	PF00076	RNA recognition motif. (a.k.a. RRM, RBD, or RNP domain)	129	190	8.7e-17	T	31-10-2019	IPR000504	RNA recognition motif domain	GO:0003676
Mmel_00009227-RA	d16477f6672c0c57ed77f70a30fd3cf8	566	Pfam	PF13202	EF hand	349	367	0.019	T	31-10-2019	IPR002048	EF-hand domain	GO:0005509
Mmel_00009227-RA	d16477f6672c0c57ed77f70a30fd3cf8	566	Pfam	PF13499	EF-hand domain pair	44	106	3e-09	T	31-10-2019	IPR002048	EF-hand domain	GO:0005509
Mmel_00012139-RA	e9f1cb047a276e6cf13b166b92ea5b50	642	Pfam	PF12316	Segment polarity protein dishevelled (Dsh) C terminal	539	611	4.4e-37	T	31-10-2019	IPR024580	Dishevelled C-terminal
Mmel_00012139-RA	e9f1cb047a276e6cf13b166b92ea5b50	642	Pfam	PF02377	Dishevelled specific domain	110	267	4.4e-65	T	31-10-2019	IPR003351	Dishevelled protein domain
Mmel_00012139-RA	e9f1cb047a276e6cf13b166b92ea5b50	642	Pfam	PF00610	Domain found in Dishevelled, Egl-10, and Pleckstrin (DEP)	464	533	7.4e-17	T	31-10-2019	IPR000591	DEP domain	GO:0035556
Mmel_00012139-RA	e9f1cb047a276e6cf13b166b92ea5b50	642	Pfam	PF00778	DIX domain	77	102	3.8e-06	T	31-10-2019	IPR001158	DIX domain
Mmel_00012139-RA	e9f1cb047a276e6cf13b166b92ea5b50	642	Pfam	PF00595	PDZ domain (Also known as DHR or GLGF)	272	355	1.3e-18	T	31-10-2019	IPR001478	PDZ domain	GO:0005515
Mmel_00004022-RA	ee6b01193f6da3bd4bba9efb6793919a	262	Pfam	PF10591	Secreted protein acidic and rich in cysteine Ca binding region	20	127	3e-32	T	31-10-2019	IPR019577	SPARC/Testican, calcium-binding domain	GO:0005509|GO:0007165
Mmel_00004022-RA	ee6b01193f6da3bd4bba9efb6793919a	262	Pfam	PF00086	Thyroglobulin type-1 repeat	136	197	4.6e-19	T	31-10-2019	IPR000716	Thyroglobulin type-1
Mmel_00001910-RA	186fd61227c980f2c7fcb6195cacc823	2680	Pfam	PF00005	ABC transporter	1586	1731	1.2e-28	T	31-10-2019	IPR003439	ABC transporter-like	GO:0005524|GO:0016887
Mmel_00001910-RA	186fd61227c980f2c7fcb6195cacc823	2680	Pfam	PF12698	ABC-2 family transporter protein	1161	1495	3.5e-20	T	31-10-2019
Mmel_00001910-RA	186fd61227c980f2c7fcb6195cacc823	2680	Pfam	PF12698	ABC-2 family transporter protein	1940	2385	1.1e-30	T	31-10-2019
Mmel_00014697-RA	28434ce2dbaf015c05a74686d53e4f43	229	Pfam	PF00047	Immunoglobulin domain	29	54	8.2e-05	T	31-10-2019	IPR013151	Immunoglobulin
Mmel_00014697-RA	28434ce2dbaf015c05a74686d53e4f43	229	Pfam	PF13927	Immunoglobulin domain	80	199	6.9e-08	T	31-10-2019
Mmel_00000494-RA	a1af99fb7fd57822d528401dc2936baf	308	Pfam	PF00753	Metallo-beta-lactamase superfamily	63	219	1.9e-15	T	31-10-2019	IPR001279	Metallo-beta-lactamase
Mmel_00011840-RA	1d1448b73429b853e36bea8603bb51d1	207	Pfam	PF00226	DnaJ domain	25	86	8.6e-28	T	31-10-2019	IPR001623	DnaJ domain
Mmel_00014008-RA	5ea8c0a0d502043734c790c8070a393e	663	Pfam	PF00646	F-box domain	27	67	5.8e-07	T	31-10-2019	IPR001810	F-box domain	GO:0005515
Mmel_00011609-RA	eab2114eef8f9df598c8ecc130973812	1131	Pfam	PF00168	C2 domain	605	688	5.6e-07	T	31-10-2019	IPR000008	C2 domain
Mmel_00011609-RA	eab2114eef8f9df598c8ecc130973812	1131	Pfam	PF00388	Phosphatidylinositol-specific phospholipase C, X domain	289	439	2.6e-59	T	31-10-2019	IPR000909	Phosphatidylinositol-specific phospholipase C, X domain
Mmel_00011609-RA	eab2114eef8f9df598c8ecc130973812	1131	Pfam	PF08703	PLC-beta C terminal	903	1075	1.5e-65	T	31-10-2019	IPR014815	Phospholipase C-beta, C-terminal domain	GO:0004435|GO:0005509|GO:0016042	KEGG: 00562+3.1.4.11|KEGG: 04070+3.1.4.11|MetaCyc: PWY-6351|MetaCyc: PWY-6367|MetaCyc: PWY-7039|Reactome: R-HSA-112043|Reactome: R-HSA-1855204|Reactome: R-HSA-399997|Reactome: R-HSA-4086398|Reactome: R-HSA-416476|Reactome: R-HSA-418217|Reactome: R-HSA-434316|Reactome: R-HSA-500657
Mmel_00011609-RA	eab2114eef8f9df598c8ecc130973812	1131	Pfam	PF00387	Phosphatidylinositol-specific phospholipase C, Y domain	483	581	2.3e-30	T	31-10-2019	IPR001711	Phospholipase C, phosphatidylinositol-specific, Y domain	GO:0004435|GO:0006629|GO:0007165|GO:0035556	KEGG: 00562+3.1.4.11|KEGG: 04070+3.1.4.11|MetaCyc: PWY-6351|MetaCyc: PWY-6367|MetaCyc: PWY-7039|Reactome: R-HSA-1855204
Mmel_00011609-RA	eab2114eef8f9df598c8ecc130973812	1131	Pfam	PF06631	Protein of unknown function (DUF1154)	810	847	1.2e-06	T	31-10-2019	IPR009535	Phospholipase C-beta, conserved site		KEGG: 00562+3.1.4.11|KEGG: 04070+3.1.4.11|MetaCyc: PWY-6351|MetaCyc: PWY-6367|MetaCyc: PWY-7039|Reactome: R-HSA-112043|Reactome: R-HSA-1855204|Reactome: R-HSA-416476
Mmel_00011609-RA	eab2114eef8f9df598c8ecc130973812	1131	Pfam	PF09279	Phosphoinositide-specific phospholipase C, efhand-like	189	277	1e-07	T	31-10-2019	IPR015359	Phosphoinositide-specific phospholipase C, EF-hand-like domain		KEGG: 00562+3.1.4.11|KEGG: 04070+3.1.4.11|MetaCyc: PWY-6351|MetaCyc: PWY-6367|MetaCyc: PWY-7039|Reactome: R-HSA-1855204
Mmel_00003189-RA	62096907797784fb9c7fc476d39c81aa	87	Pfam	PF15161	Neuropeptide-like	29	70	2.3e-28	T	31-10-2019	IPR028147	Neuropeptide-like protein
Mmel_00001198-RA	90e91b9b35ac3b758857f09077e010f5	316	Pfam	PF08596	Lethal giant larvae(Lgl) like, C-terminal	71	189	2e-06	T	31-10-2019	IPR013905	Lethal giant larvae (Lgl)-like, C-terminal domain
Mmel_00008949-RA	b8813c1c19eda28d56d5195c82ad9741	362	Pfam	PF02984	Cyclin, C-terminal domain	122	242	2.5e-19	T	31-10-2019	IPR004367	Cyclin, C-terminal domain	GO:0005634
Mmel_00008949-RA	b8813c1c19eda28d56d5195c82ad9741	362	Pfam	PF00134	Cyclin, N-terminal domain	13	120	1e-18	T	31-10-2019	IPR006671	Cyclin, N-terminal
Mmel_00012090-RA	a03f480fa2c0e2ebcb9963f3886681fd	444	Pfam	PF03700	Sorting nexin, N-terminal domain	4	83	1.1e-16	T	31-10-2019	IPR005329	Sorting nexin, N-terminal	GO:0006886
Mmel_00012090-RA	a03f480fa2c0e2ebcb9963f3886681fd	444	Pfam	PF09325	Vps5 C terminal like	207	438	4e-82	T	31-10-2019	IPR015404	Sorting nexin Vps5-like, C-terminal
Mmel_00012090-RA	a03f480fa2c0e2ebcb9963f3886681fd	444	Pfam	PF00787	PX domain	108	197	3.8e-21	T	31-10-2019	IPR001683	Phox homologous domain	GO:0035091
Mmel_00002260-RA	53a975436d2cc8f9aaca5721b76f037d	285	Pfam	PF00590	Tetrapyrrole (Corrin/Porphyrin) Methylases	1	239	1e-22	T	31-10-2019	IPR000878	Tetrapyrrole methylase	GO:0008152|GO:0008168	Reactome: R-HSA-5358493
Mmel_00009702-RA	9b9b6c3503827862e2506e3735d72355	344	Pfam	PF00096	Zinc finger, C2H2 type	124	146	2.6e-05	T	31-10-2019
Mmel_00009702-RA	9b9b6c3503827862e2506e3735d72355	344	Pfam	PF00096	Zinc finger, C2H2 type	152	174	0.0067	T	31-10-2019
Mmel_00009702-RA	9b9b6c3503827862e2506e3735d72355	344	Pfam	PF00096	Zinc finger, C2H2 type	96	118	2.7e-06	T	31-10-2019
Mmel_00012700-RA	6054bba80740bd685af907c3dc761e94	296	Pfam	PF00245	Alkaline phosphatase	1	61	5.4e-17	T	31-10-2019	IPR001952	Alkaline phosphatase	GO:0008152|GO:0016791	KEGG: 00790+3.1.3.1|MetaCyc: PWY-5083|MetaCyc: PWY-5491
Mmel_00012700-RA	6054bba80740bd685af907c3dc761e94	296	Pfam	PF00245	Alkaline phosphatase	219	278	6.6e-21	T	31-10-2019	IPR001952	Alkaline phosphatase	GO:0008152|GO:0016791	KEGG: 00790+3.1.3.1|MetaCyc: PWY-5083|MetaCyc: PWY-5491
Mmel_00012700-RA	6054bba80740bd685af907c3dc761e94	296	Pfam	PF00245	Alkaline phosphatase	65	173	1.9e-37	T	31-10-2019	IPR001952	Alkaline phosphatase	GO:0008152|GO:0016791	KEGG: 00790+3.1.3.1|MetaCyc: PWY-5083|MetaCyc: PWY-5491
Mmel_00002288-RA	7bc5aeb4621450a9c09260b52350711f	622	Pfam	PF00270	DEAD/DEAH box helicase	230	392	5.4e-44	T	31-10-2019	IPR011545	DEAD/DEAH box helicase domain	GO:0003676|GO:0005524
Mmel_00002288-RA	7bc5aeb4621450a9c09260b52350711f	622	Pfam	PF00271	Helicase conserved C-terminal domain	433	543	9.3e-20	T	31-10-2019	IPR001650	Helicase, C-terminal
Mmel_00002288-RA	7bc5aeb4621450a9c09260b52350711f	622	Pfam	PF04438	HIT zinc finger	110	136	2.5e-07	T	31-10-2019	IPR007529	Zinc finger, HIT-type
Mmel_00000647-RA	50384d89cbfd2b694892e71c4f01e7cb	310	Pfam	PF00018	SH3 domain	95	142	7.6e-20	T	31-10-2019	IPR001452	SH3 domain	GO:0005515
Mmel_00000647-RA	50384d89cbfd2b694892e71c4f01e7cb	310	Pfam	PF00017	SH2 domain	156	252	2.5e-23	T	31-10-2019	IPR000980	SH2 domain
Mmel_00006044-RA	cce8824adda4df150c7bb7f1943d010d	782	Pfam	PF16666	Unstructured region on MAGI	34	136	3.3e-35	T	31-10-2019
Mmel_00006044-RA	cce8824adda4df150c7bb7f1943d010d	782	Pfam	PF00595	PDZ domain (Also known as DHR or GLGF)	319	398	1.3e-14	T	31-10-2019	IPR001478	PDZ domain	GO:0005515
Mmel_00006044-RA	cce8824adda4df150c7bb7f1943d010d	782	Pfam	PF00595	PDZ domain (Also known as DHR or GLGF)	171	245	2.4e-11	T	31-10-2019	IPR001478	PDZ domain	GO:0005515
Mmel_00006044-RA	cce8824adda4df150c7bb7f1943d010d	782	Pfam	PF00595	PDZ domain (Also known as DHR or GLGF)	462	537	2.7e-14	T	31-10-2019	IPR001478	PDZ domain	GO:0005515
Mmel_00009099-RA	1647a836b2a48c044c9f3db016e94174	318	Pfam	PF12257	Vacuolar membrane-associated protein Iml1	100	315	3.7e-81	T	31-10-2019	IPR027244	Vacuolar membrane-associated protein Iml1
Mmel_00005151-RA	ebfc9f56349e395fc396a43c5353b641	139	Pfam	PF00293	NUDIX domain	10	84	9.1e-08	T	31-10-2019	IPR000086	NUDIX hydrolase domain	GO:0016787
Mmel_00009026-RA	d27ade5977a2bbf70b83845e3deb3458	1030	Pfam	PF00271	Helicase conserved C-terminal domain	712	827	8.2e-20	T	31-10-2019	IPR001650	Helicase, C-terminal
Mmel_00009026-RA	d27ade5977a2bbf70b83845e3deb3458	1030	Pfam	PF04851	Type III restriction enzyme, res subunit	308	510	1.3e-17	T	31-10-2019	IPR006935	Helicase/UvrB, N-terminal	GO:0003677|GO:0005524|GO:0016787
Mmel_00009026-RA	d27ade5977a2bbf70b83845e3deb3458	1030	Pfam	PF11648	C-terminal domain of RIG-I	907	1022	4.5e-39	T	31-10-2019	IPR021673	RIG-I-like receptor, C-terminal regulatory domain		Reactome: R-HSA-168928
Mmel_00009026-RA	d27ade5977a2bbf70b83845e3deb3458	1030	Pfam	PF16739	Caspase recruitment domain	7	95	3e-16	T	31-10-2019	IPR031964	Caspase recruitment domain		Reactome: R-HSA-168928|Reactome: R-HSA-5689896|Reactome: R-HSA-918233|Reactome: R-HSA-933541|Reactome: R-HSA-933542|Reactome: R-HSA-933543|Reactome: R-HSA-936440
Mmel_00009026-RA	d27ade5977a2bbf70b83845e3deb3458	1030	Pfam	PF16739	Caspase recruitment domain	109	200	3.1e-20	T	31-10-2019	IPR031964	Caspase recruitment domain		Reactome: R-HSA-168928|Reactome: R-HSA-5689896|Reactome: R-HSA-918233|Reactome: R-HSA-933541|Reactome: R-HSA-933542|Reactome: R-HSA-933543|Reactome: R-HSA-936440
Mmel_00011342-RA	3a5e0ef2b1dd5c5bd8ab23537e4dcd90	80	Pfam	PF02991	Autophagy protein Atg8 ubiquitin like	20	57	8.5e-10	T	31-10-2019	IPR004241	Autophagy protein Atg8 ubiquitin-like		Reactome: R-HSA-1632852
Mmel_00011596-RA	ed600f66bb4bfcc278edb24fec6613bd	271	Pfam	PF13499	EF-hand domain pair	128	202	1.5e-17	T	31-10-2019	IPR002048	EF-hand domain	GO:0005509
Mmel_00011596-RA	ed600f66bb4bfcc278edb24fec6613bd	271	Pfam	PF13833	EF-hand domain pair	70	115	0.00039	T	31-10-2019	IPR002048	EF-hand domain	GO:0005509
Mmel_00004332-RA	ce768d935b19294805a0def62c973990	1062	Pfam	PF00178	Ets-domain	464	543	6.6e-38	T	31-10-2019	IPR000418	Ets domain	GO:0003700|GO:0006355|GO:0043565
Mmel_00004332-RA	ce768d935b19294805a0def62c973990	1062	Pfam	PF04621	PEA3 subfamily ETS-domain transcription factor N terminal domain	162	352	1.4e-61	T	31-10-2019	IPR006715	PEA3-type ETS-domain transcription factor, N-terminal	GO:0003700|GO:0005634|GO:0006355
Mmel_00004332-RA	ce768d935b19294805a0def62c973990	1062	Pfam	PF04621	PEA3 subfamily ETS-domain transcription factor N terminal domain	417	461	5.2e-19	T	31-10-2019	IPR006715	PEA3-type ETS-domain transcription factor, N-terminal	GO:0003700|GO:0005634|GO:0006355
Mmel_00003730-RA	43d9d39dbb1c482c73f4ef2b0713ff35	1210	Pfam	PF10162	G8 domain	64	179	1.3e-28	T	31-10-2019	IPR019316	G8 domain
Mmel_00003730-RA	43d9d39dbb1c482c73f4ef2b0713ff35	1210	Pfam	PF15711	Interleukin-like EMT inducer	1094	1178	1.7e-13	T	31-10-2019
Mmel_00003730-RA	43d9d39dbb1c482c73f4ef2b0713ff35	1210	Pfam	PF15711	Interleukin-like EMT inducer	201	291	8.6e-24	T	31-10-2019
Mmel_00003730-RA	43d9d39dbb1c482c73f4ef2b0713ff35	1210	Pfam	PF13330	Mucin-2 protein WxxW repeating region	338	420	2e-14	T	31-10-2019	IPR025155	WxxW domain
Mmel_00003730-RA	43d9d39dbb1c482c73f4ef2b0713ff35	1210	Pfam	PF13330	Mucin-2 protein WxxW repeating region	462	532	13	T	31-10-2019	IPR025155	WxxW domain
Mmel_00005916-RA	9a72484f4b8c10d8959afaa820d4bac1	302	Pfam	PF13426	PAS domain	14	108	2e-18	T	31-10-2019	IPR000014	PAS domain
Mmel_00005916-RA	9a72484f4b8c10d8959afaa820d4bac1	302	Pfam	PF00520	Ion transport protein	191	283	2.8e-14	T	31-10-2019	IPR005821	Ion transport domain	GO:0005216|GO:0006811|GO:0016020|GO:0055085
Mmel_00006276-RA	73a0181c4f00b2c7db35453d96dde67d	319	Pfam	PF03803	Scramblase	63	271	3.6e-69	T	31-10-2019	IPR005552	Scramblase
Mmel_00002567-RA	0c3dc83e1ed1a6ebfd44731251142477	405	Pfam	PF00622	SPRY domain	278	392	6.2e-17	T	31-10-2019	IPR003877	SPRY domain	GO:0005515
Mmel_00002567-RA	0c3dc83e1ed1a6ebfd44731251142477	405	Pfam	PF13765	SPRY-associated domain	224	271	1.5e-12	T	31-10-2019	IPR006574	SPRY-associated
Mmel_00002567-RA	0c3dc83e1ed1a6ebfd44731251142477	405	Pfam	PF00041	Fibronectin type III domain	133	209	1.8e-07	T	31-10-2019	IPR003961	Fibronectin type III	GO:0005515
Mmel_00007372-RA	24041481d0cd016da0b869442f9129fa	464	Pfam	PF00151	Lipase	6	312	2.8e-121	T	31-10-2019	IPR013818	Lipase/vitellogenin
Mmel_00007372-RA	24041481d0cd016da0b869442f9129fa	464	Pfam	PF01477	PLAT/LH2 domain	317	437	5.3e-20	T	31-10-2019	IPR001024	PLAT/LH2 domain	GO:0005515
Mmel_00009987-RA	551e6515bc0000731c991ccdab41dd96	1678	Pfam	PF00787	PX domain	22	110	3.6e-17	T	31-10-2019	IPR001683	Phox homologous domain	GO:0035091
Mmel_00001174-RA	83b6da75a7d314bd9b54922b6f2da3e5	409	Pfam	PF01108	Tissue factor	13	97	4.3e-18	T	31-10-2019	IPR003961	Fibronectin type III	GO:0005515
Mmel_00001174-RA	83b6da75a7d314bd9b54922b6f2da3e5	409	Pfam	PF09294	Interferon-alpha/beta receptor, fibronectin type III	111	207	3.5e-10	T	31-10-2019	IPR015373	Interferon/interleukin receptor domain
Mmel_00003553-RA	951dd5381c1f457065961c348a0144ec	951	Pfam	PF08516	ADAM cysteine-rich	477	587	1.1e-27	T	31-10-2019	IPR006586	ADAM, cysteine-rich
Mmel_00003553-RA	951dd5381c1f457065961c348a0144ec	951	Pfam	PF01421	Reprolysin (M12B) family zinc metalloprotease	185	384	8.2e-60	T	31-10-2019	IPR001590	Peptidase M12B, ADAM/reprolysin	GO:0004222|GO:0006508
Mmel_00003553-RA	951dd5381c1f457065961c348a0144ec	951	Pfam	PF00200	Disintegrin	399	471	1.6e-15	T	31-10-2019	IPR001762	Disintegrin domain
Mmel_00003553-RA	951dd5381c1f457065961c348a0144ec	951	Pfam	PF01562	Reprolysin family propeptide	78	134	2.1e-15	T	31-10-2019	IPR002870	Peptidase M12B, propeptide
Mmel_00010488-RA	15be0fc02854f3768a954fd6434c42b9	350	Pfam	PF17171	Glutathione S-transferase, C-terminal domain	207	269	7.2e-19	T	31-10-2019	IPR033468	Metaxin, glutathione S-transferase domain
Mmel_00010488-RA	15be0fc02854f3768a954fd6434c42b9	350	Pfam	PF17172	Glutathione S-transferase N-terminal domain	62	155	3.1e-32	T	31-10-2019	IPR012336	Thioredoxin-like fold
Mmel_00014557-RA	6030d89771646f7f6988b7f7efe83486	193	Pfam	PF00089	Trypsin	106	191	1.2e-18	T	31-10-2019	IPR001254	Serine proteases, trypsin domain	GO:0004252|GO:0006508
Mmel_00012476-RA	01846af9540aeab562a0d61efa561cc1	115	Pfam	PF13923	Zinc finger, C3HC4 type (RING finger)	39	77	1.2e-08	T	31-10-2019
Mmel_00002651-RA	6767def3ef9e116709a2c007ee5fdb1a	378	Pfam	PF10436	Mitochondrial branched-chain alpha-ketoacid dehydrogenase kinase	12	160	2e-46	T	31-10-2019	IPR018955	Branched-chain alpha-ketoacid dehydrogenase kinase/Pyruvate dehydrogenase kinase, N-terminal		Reactome: R-HSA-204174|Reactome: R-HSA-5362517
Mmel_00002651-RA	6767def3ef9e116709a2c007ee5fdb1a	378	Pfam	PF02518	Histidine kinase-, DNA gyrase B-, and HSP90-like ATPase	210	331	3.7e-13	T	31-10-2019	IPR003594	Histidine kinase/HSP90-like ATPase
Mmel_00006797-RA	b64747ffc25a6c0ef0288f8db0163e88	268	Pfam	PF13516	Leucine Rich repeat	78	98	0.15	T	31-10-2019	IPR001611	Leucine-rich repeat	GO:0005515
Mmel_00006797-RA	b64747ffc25a6c0ef0288f8db0163e88	268	Pfam	PF13516	Leucine Rich repeat	136	153	1.1	T	31-10-2019	IPR001611	Leucine-rich repeat	GO:0005515
Mmel_00013932-RA	593d1a4e15fc68f6dde35425a00412b7	472	Pfam	PF16673	TNF receptor-associated factor BIRC3 binding domain	238	301	1.1e-31	T	31-10-2019	IPR032070	TNF receptor-associated factor, BIRC3 binding domain		Reactome: R-HSA-5357905|Reactome: R-HSA-5357956
Mmel_00013932-RA	593d1a4e15fc68f6dde35425a00412b7	472	Pfam	PF02176	TRAF-type zinc finger	124	180	2e-16	T	31-10-2019	IPR001293	Zinc finger, TRAF-type	GO:0008270
Mmel_00013932-RA	593d1a4e15fc68f6dde35425a00412b7	472	Pfam	PF00097	Zinc finger, C3HC4 type (RING finger)	34	72	5e-05	T	31-10-2019	IPR018957	Zinc finger, C3HC4 RING-type	GO:0046872
Mmel_00001974-RA	580e07827d3562f6158a8be7565e0330	645	Pfam	PF12832	MFS_1 like family	111	413	1.2e-62	T	31-10-2019	IPR024989	Major facilitator superfamily associated domain
Mmel_00001974-RA	580e07827d3562f6158a8be7565e0330	645	Pfam	PF12832	MFS_1 like family	71	110	6.6e-06	T	31-10-2019	IPR024989	Major facilitator superfamily associated domain
Mmel_00011563-RA	95f8ea2ce5865584d332d4af49da8e3a	308	Pfam	PF00001	7 transmembrane receptor (rhodopsin family)	17	266	9.2e-47	T	31-10-2019	IPR000276	G protein-coupled receptor, rhodopsin-like	GO:0004930|GO:0007186|GO:0016021
Mmel_00004587-RA	252b7795847dba17d9c901d35961ed24	697	Pfam	PF10366	Vacuolar sorting protein 39 domain 1	271	373	1.3e-32	T	31-10-2019	IPR019452	Vacuolar sorting protein 39/Transforming growth factor beta receptor-associated domain 1
Mmel_00004587-RA	252b7795847dba17d9c901d35961ed24	697	Pfam	PF00780	CNH domain	13	101	2.8e-07	T	31-10-2019	IPR001180	Citron homology (CNH) domain
Mmel_00004587-RA	252b7795847dba17d9c901d35961ed24	697	Pfam	PF10367	Vacuolar sorting protein 39 domain 2	583	690	3.9e-31	T	31-10-2019	IPR019453	Vacuolar sorting protein 39/Transforming growth factor beta receptor-associated domain 2
Mmel_00006046-RA	20254f608f22ac4fd8c66dda05a05afa	368	Pfam	PF16663	Unstructured region on MAGI	129	186	1.7e-27	T	31-10-2019
Mmel_00006046-RA	20254f608f22ac4fd8c66dda05a05afa	368	Pfam	PF00625	Guanylate kinase	7	46	7.4e-07	T	31-10-2019	IPR008145	Guanylate kinase/L-type calcium channel beta subunit
Mmel_00006046-RA	20254f608f22ac4fd8c66dda05a05afa	368	Pfam	PF00397	WW domain	230	259	1.8e-10	T	31-10-2019	IPR001202	WW domain	GO:0005515
Mmel_00006046-RA	20254f608f22ac4fd8c66dda05a05afa	368	Pfam	PF00397	WW domain	290	319	1.8e-07	T	31-10-2019	IPR001202	WW domain	GO:0005515
Mmel_00008139-RA	788e7068fc7cf6aceaa40747f9b55132	1267	Pfam	PF05190	MutS family domain IV	839	931	1e-15	T	31-10-2019	IPR007861	DNA mismatch repair protein MutS, clamp	GO:0005524|GO:0006298|GO:0030983
Mmel_00008139-RA	788e7068fc7cf6aceaa40747f9b55132	1267	Pfam	PF00488	MutS domain V	1038	1231	1.1e-71	T	31-10-2019	IPR000432	DNA mismatch repair protein MutS, C-terminal	GO:0005524|GO:0006298|GO:0030983
Mmel_00008139-RA	788e7068fc7cf6aceaa40747f9b55132	1267	Pfam	PF05188	MutS domain II	447	605	2.6e-10	T	31-10-2019	IPR007860	DNA mismatch repair protein MutS, connector domain	GO:0005524|GO:0006298|GO:0030983
Mmel_00008139-RA	788e7068fc7cf6aceaa40747f9b55132	1267	Pfam	PF01624	MutS domain I	316	433	1e-32	T	31-10-2019	IPR007695	DNA mismatch repair protein MutS-like, N-terminal	GO:0005524|GO:0006298|GO:0030983	Reactome: R-HSA-5632928
Mmel_00008139-RA	788e7068fc7cf6aceaa40747f9b55132	1267	Pfam	PF00855	PWWP domain	1	89	3e-19	T	31-10-2019	IPR000313	PWWP domain
Mmel_00008139-RA	788e7068fc7cf6aceaa40747f9b55132	1267	Pfam	PF05192	MutS domain III	646	971	2.1e-39	T	31-10-2019	IPR007696	DNA mismatch repair protein MutS, core	GO:0005524|GO:0006298|GO:0030983
Mmel_00005027-RA	c6c753e33cf95314e3b291858d4952d0	1297	Pfam	PF00400	WD domain, G-beta repeat	629	668	0.0016	T	31-10-2019	IPR001680	WD40 repeat	GO:0005515
Mmel_00005027-RA	c6c753e33cf95314e3b291858d4952d0	1297	Pfam	PF00400	WD domain, G-beta repeat	78	112	0.25	T	31-10-2019	IPR001680	WD40 repeat	GO:0005515
Mmel_00005027-RA	c6c753e33cf95314e3b291858d4952d0	1297	Pfam	PF00400	WD domain, G-beta repeat	544	582	5.5e-07	T	31-10-2019	IPR001680	WD40 repeat	GO:0005515
Mmel_00005027-RA	c6c753e33cf95314e3b291858d4952d0	1297	Pfam	PF00400	WD domain, G-beta repeat	588	625	6.9e-06	T	31-10-2019	IPR001680	WD40 repeat	GO:0005515
Mmel_00005027-RA	c6c753e33cf95314e3b291858d4952d0	1297	Pfam	PF12894	Anaphase-promoting complex subunit 4 WD40 domain	393	477	0.00019	T	31-10-2019	IPR024977	Anaphase-promoting complex subunit 4, WD40 domain
Mmel_00007204-RA	fa172acef22972058848453209101323	337	Pfam	PF00001	7 transmembrane receptor (rhodopsin family)	23	294	1.2e-32	T	31-10-2019	IPR000276	G protein-coupled receptor, rhodopsin-like	GO:0004930|GO:0007186|GO:0016021
Mmel_00008864-RA	80642244af6d4caf3c5aa1d6a3cd4e44	3021	Pfam	PF07645	Calcium-binding EGF domain	1175	1213	1.1e-07	T	31-10-2019	IPR001881	EGF-like calcium-binding domain	GO:0005509
Mmel_00008864-RA	80642244af6d4caf3c5aa1d6a3cd4e44	3021	Pfam	PF02494	HYR domain	304	381	4.4e-15	T	31-10-2019	IPR003410	HYR domain
Mmel_00008864-RA	80642244af6d4caf3c5aa1d6a3cd4e44	3021	Pfam	PF02494	HYR domain	207	302	5.9e-14	T	31-10-2019	IPR003410	HYR domain
Mmel_00008864-RA	80642244af6d4caf3c5aa1d6a3cd4e44	3021	Pfam	PF00008	EGF-like domain	805	834	9.3e-07	T	31-10-2019	IPR000742	EGF-like domain
Mmel_00008864-RA	80642244af6d4caf3c5aa1d6a3cd4e44	3021	Pfam	PF00008	EGF-like domain	2975	2999	4.2e-05	T	31-10-2019	IPR000742	EGF-like domain
Mmel_00008864-RA	80642244af6d4caf3c5aa1d6a3cd4e44	3021	Pfam	PF00008	EGF-like domain	767	795	3.2e-08	T	31-10-2019	IPR000742	EGF-like domain
Mmel_00008864-RA	80642244af6d4caf3c5aa1d6a3cd4e44	3021	Pfam	PF00354	Pentaxin family	873	1041	5.1e-26	T	31-10-2019	IPR001759	Pentraxin-related
Mmel_00008864-RA	80642244af6d4caf3c5aa1d6a3cd4e44	3021	Pfam	PF07699	Putative ephrin-receptor like	628	675	4.8e-15	T	31-10-2019	IPR011641	Tyrosine-protein kinase ephrin type A/B receptor-like
Mmel_00008864-RA	80642244af6d4caf3c5aa1d6a3cd4e44	3021	Pfam	PF07699	Putative ephrin-receptor like	682	729	4.7e-14	T	31-10-2019	IPR011641	Tyrosine-protein kinase ephrin type A/B receptor-like
Mmel_00008864-RA	80642244af6d4caf3c5aa1d6a3cd4e44	3021	Pfam	PF00084	Sushi repeat (SCR repeat)	1120	1173	1.3e-11	T	31-10-2019	IPR000436	Sushi/SCR/CCP domain
Mmel_00008864-RA	80642244af6d4caf3c5aa1d6a3cd4e44	3021	Pfam	PF00084	Sushi repeat (SCR repeat)	1811	1864	8.1e-10	T	31-10-2019	IPR000436	Sushi/SCR/CCP domain
Mmel_00008864-RA	80642244af6d4caf3c5aa1d6a3cd4e44	3021	Pfam	PF00084	Sushi repeat (SCR repeat)	2099	2138	2.3e-07	T	31-10-2019	IPR000436	Sushi/SCR/CCP domain
Mmel_00008864-RA	80642244af6d4caf3c5aa1d6a3cd4e44	3021	Pfam	PF00084	Sushi repeat (SCR repeat)	1513	1566	1.5e-07	T	31-10-2019	IPR000436	Sushi/SCR/CCP domain
Mmel_00008864-RA	80642244af6d4caf3c5aa1d6a3cd4e44	3021	Pfam	PF00084	Sushi repeat (SCR repeat)	1068	1115	1.1e-09	T	31-10-2019	IPR000436	Sushi/SCR/CCP domain
Mmel_00008864-RA	80642244af6d4caf3c5aa1d6a3cd4e44	3021	Pfam	PF00084	Sushi repeat (SCR repeat)	1985	2037	2.7e-10	T	31-10-2019	IPR000436	Sushi/SCR/CCP domain
Mmel_00008864-RA	80642244af6d4caf3c5aa1d6a3cd4e44	3021	Pfam	PF00084	Sushi repeat (SCR repeat)	1393	1446	2.8e-12	T	31-10-2019	IPR000436	Sushi/SCR/CCP domain
Mmel_00008864-RA	80642244af6d4caf3c5aa1d6a3cd4e44	3021	Pfam	PF00084	Sushi repeat (SCR repeat)	1219	1272	1.2e-12	T	31-10-2019	IPR000436	Sushi/SCR/CCP domain
Mmel_00008864-RA	80642244af6d4caf3c5aa1d6a3cd4e44	3021	Pfam	PF00084	Sushi repeat (SCR repeat)	2728	2781	3.6e-13	T	31-10-2019	IPR000436	Sushi/SCR/CCP domain
Mmel_00008864-RA	80642244af6d4caf3c5aa1d6a3cd4e44	3021	Pfam	PF00084	Sushi repeat (SCR repeat)	2548	2605	3.2e-08	T	31-10-2019	IPR000436	Sushi/SCR/CCP domain
Mmel_00008864-RA	80642244af6d4caf3c5aa1d6a3cd4e44	3021	Pfam	PF00084	Sushi repeat (SCR repeat)	1277	1330	2.6e-08	T	31-10-2019	IPR000436	Sushi/SCR/CCP domain
Mmel_00008864-RA	80642244af6d4caf3c5aa1d6a3cd4e44	3021	Pfam	PF00084	Sushi repeat (SCR repeat)	2201	2254	2.8e-12	T	31-10-2019	IPR000436	Sushi/SCR/CCP domain
Mmel_00008864-RA	80642244af6d4caf3c5aa1d6a3cd4e44	3021	Pfam	PF00084	Sushi repeat (SCR repeat)	1927	1980	8e-13	T	31-10-2019	IPR000436	Sushi/SCR/CCP domain
Mmel_00008864-RA	80642244af6d4caf3c5aa1d6a3cd4e44	3021	Pfam	PF00084	Sushi repeat (SCR repeat)	2433	2485	8.1e-09	T	31-10-2019	IPR000436	Sushi/SCR/CCP domain
Mmel_00008864-RA	80642244af6d4caf3c5aa1d6a3cd4e44	3021	Pfam	PF00084	Sushi repeat (SCR repeat)	2259	2312	1.7e-10	T	31-10-2019	IPR000436	Sushi/SCR/CCP domain
Mmel_00008864-RA	80642244af6d4caf3c5aa1d6a3cd4e44	3021	Pfam	PF00084	Sushi repeat (SCR repeat)	1869	1922	1.6e-08	T	31-10-2019	IPR000436	Sushi/SCR/CCP domain
Mmel_00008864-RA	80642244af6d4caf3c5aa1d6a3cd4e44	3021	Pfam	PF00084	Sushi repeat (SCR repeat)	2670	2723	4.2e-11	T	31-10-2019	IPR000436	Sushi/SCR/CCP domain
Mmel_00008864-RA	80642244af6d4caf3c5aa1d6a3cd4e44	3021	Pfam	PF00084	Sushi repeat (SCR repeat)	2143	2196	8.1e-10	T	31-10-2019	IPR000436	Sushi/SCR/CCP domain
Mmel_00008864-RA	80642244af6d4caf3c5aa1d6a3cd4e44	3021	Pfam	PF00084	Sushi repeat (SCR repeat)	1576	1629	5.8e-13	T	31-10-2019	IPR000436	Sushi/SCR/CCP domain
Mmel_00008864-RA	80642244af6d4caf3c5aa1d6a3cd4e44	3021	Pfam	PF00084	Sushi repeat (SCR repeat)	2812	2866	3.8e-10	T	31-10-2019	IPR000436	Sushi/SCR/CCP domain
Mmel_00008864-RA	80642244af6d4caf3c5aa1d6a3cd4e44	3021	Pfam	PF00084	Sushi repeat (SCR repeat)	1634	1689	1.9e-09	T	31-10-2019	IPR000436	Sushi/SCR/CCP domain
Mmel_00008864-RA	80642244af6d4caf3c5aa1d6a3cd4e44	3021	Pfam	PF00084	Sushi repeat (SCR repeat)	1694	1748	5.6e-11	T	31-10-2019	IPR000436	Sushi/SCR/CCP domain
Mmel_00008864-RA	80642244af6d4caf3c5aa1d6a3cd4e44	3021	Pfam	PF00084	Sushi repeat (SCR repeat)	1753	1806	4.1e-07	T	31-10-2019	IPR000436	Sushi/SCR/CCP domain
Mmel_00008864-RA	80642244af6d4caf3c5aa1d6a3cd4e44	3021	Pfam	PF00084	Sushi repeat (SCR repeat)	25	80	6.4e-06	T	31-10-2019	IPR000436	Sushi/SCR/CCP domain
Mmel_00008864-RA	80642244af6d4caf3c5aa1d6a3cd4e44	3021	Pfam	PF00084	Sushi repeat (SCR repeat)	2317	2370	3.2e-13	T	31-10-2019	IPR000436	Sushi/SCR/CCP domain
Mmel_00008864-RA	80642244af6d4caf3c5aa1d6a3cd4e44	3021	Pfam	PF00084	Sushi repeat (SCR repeat)	2490	2543	1.2e-07	T	31-10-2019	IPR000436	Sushi/SCR/CCP domain
Mmel_00008864-RA	80642244af6d4caf3c5aa1d6a3cd4e44	3021	Pfam	PF00084	Sushi repeat (SCR repeat)	2871	2923	4.7e-10	T	31-10-2019	IPR000436	Sushi/SCR/CCP domain
Mmel_00008864-RA	80642244af6d4caf3c5aa1d6a3cd4e44	3021	Pfam	PF00084	Sushi repeat (SCR repeat)	1451	1508	2e-07	T	31-10-2019	IPR000436	Sushi/SCR/CCP domain
Mmel_00008864-RA	80642244af6d4caf3c5aa1d6a3cd4e44	3021	Pfam	PF00084	Sushi repeat (SCR repeat)	2610	2661	4.3e-08	T	31-10-2019	IPR000436	Sushi/SCR/CCP domain
Mmel_00008864-RA	80642244af6d4caf3c5aa1d6a3cd4e44	3021	Pfam	PF00084	Sushi repeat (SCR repeat)	1335	1388	8.9e-12	T	31-10-2019	IPR000436	Sushi/SCR/CCP domain
Mmel_00008864-RA	80642244af6d4caf3c5aa1d6a3cd4e44	3021	Pfam	PF00084	Sushi repeat (SCR repeat)	85	140	4.5e-10	T	31-10-2019	IPR000436	Sushi/SCR/CCP domain
Mmel_00008864-RA	80642244af6d4caf3c5aa1d6a3cd4e44	3021	Pfam	PF00084	Sushi repeat (SCR repeat)	2375	2428	6.4e-10	T	31-10-2019	IPR000436	Sushi/SCR/CCP domain
Mmel_00001383-RA	afd7c3633c30e9a05522fab4a776cfff	360	Pfam	PF00008	EGF-like domain	71	102	4.7e-08	T	31-10-2019	IPR000742	EGF-like domain
Mmel_00001383-RA	afd7c3633c30e9a05522fab4a776cfff	360	Pfam	PF00008	EGF-like domain	153	182	9.4e-09	T	31-10-2019	IPR000742	EGF-like domain
Mmel_00001383-RA	afd7c3633c30e9a05522fab4a776cfff	360	Pfam	PF00008	EGF-like domain	191	220	6.5e-06	T	31-10-2019	IPR000742	EGF-like domain
Mmel_00001383-RA	afd7c3633c30e9a05522fab4a776cfff	360	Pfam	PF00008	EGF-like domain	116	144	8e-06	T	31-10-2019	IPR000742	EGF-like domain
Mmel_00010712-RA	aad7f041224084922397238c599b5563	422	Pfam	PF00685	Sulfotransferase domain	70	382	4.1e-27	T	31-10-2019	IPR000863	Sulfotransferase domain	GO:0008146
Mmel_00002455-RA	1a48f97f02724659024a7fe88e37a149	127	Pfam	PF00049	Insulin/IGF/Relaxin family	48	126	3.6e-24	T	31-10-2019	IPR016179	Insulin-like	GO:0005179|GO:0005576
Mmel_00006743-RA	f09d2a96a2b53c48c80ae2f24ac433f2	440	Pfam	PF01591	6-phosphofructo-2-kinase	3	215	3.1e-97	T	31-10-2019	IPR013079	6-phosphofructo-2-kinase	GO:0003873|GO:0005524|GO:0006000	KEGG: 00051+2.7.1.105+3.1.3.46|Reactome: R-HSA-70171
Mmel_00006743-RA	f09d2a96a2b53c48c80ae2f24ac433f2	440	Pfam	PF00300	Histidine phosphatase superfamily (branch 1)	218	401	2.8e-43	T	31-10-2019	IPR013078	Histidine phosphatase superfamily, clade-1
Mmel_00007128-RA	f144c3cb4fdc74773076f3415f01538e	514	Pfam	PF00651	BTB/POZ domain	1	69	9.3e-14	T	31-10-2019	IPR000210	BTB/POZ domain	GO:0005515
Mmel_00007128-RA	f144c3cb4fdc74773076f3415f01538e	514	Pfam	PF01344	Kelch motif	453	491	1.3e-10	T	31-10-2019	IPR006652	Kelch repeat type 1	GO:0005515
Mmel_00007128-RA	f144c3cb4fdc74773076f3415f01538e	514	Pfam	PF01344	Kelch motif	304	348	9.6e-12	T	31-10-2019	IPR006652	Kelch repeat type 1	GO:0005515
Mmel_00007128-RA	f144c3cb4fdc74773076f3415f01538e	514	Pfam	PF01344	Kelch motif	397	448	4.9e-11	T	31-10-2019	IPR006652	Kelch repeat type 1	GO:0005515
Mmel_00007128-RA	f144c3cb4fdc74773076f3415f01538e	514	Pfam	PF01344	Kelch motif	350	395	5.5e-15	T	31-10-2019	IPR006652	Kelch repeat type 1	GO:0005515
Mmel_00007128-RA	f144c3cb4fdc74773076f3415f01538e	514	Pfam	PF01344	Kelch motif	256	301	2.5e-15	T	31-10-2019	IPR006652	Kelch repeat type 1	GO:0005515
Mmel_00007128-RA	f144c3cb4fdc74773076f3415f01538e	514	Pfam	PF01344	Kelch motif	220	254	3.4e-07	T	31-10-2019	IPR006652	Kelch repeat type 1	GO:0005515
Mmel_00007128-RA	f144c3cb4fdc74773076f3415f01538e	514	Pfam	PF07707	BTB And C-terminal Kelch	75	174	4.8e-32	T	31-10-2019	IPR011705	BTB/Kelch-associated
Mmel_00013060-RA	c2ba7df879883269741909f8f5e990f4	391	Pfam	PF02932	Neurotransmitter-gated ion-channel transmembrane region	198	291	1.9e-33	T	31-10-2019	IPR006029	Neurotransmitter-gated ion-channel transmembrane domain	GO:0006811|GO:0016021
Mmel_00013060-RA	c2ba7df879883269741909f8f5e990f4	391	Pfam	PF02931	Neurotransmitter-gated ion-channel ligand binding domain	28	190	2.3e-37	T	31-10-2019	IPR006202	Neurotransmitter-gated ion-channel ligand-binding domain	GO:0005230|GO:0006811|GO:0016021
Mmel_00003998-RA	b064a78bc8c1ec2054ea785d3b1ac6a4	104	Pfam	PF01124	MAPEG family	9	100	1.5e-14	T	31-10-2019	IPR001129	Membrane-associated, eicosanoid/glutathione metabolism (MAPEG) protein
Mmel_00014027-RA	21c09cc3e49be7f30012a4e07ba6cb13	96	Pfam	PF10613	Ligated ion channel L-glutamate- and glycine-binding site	5	63	1e-19	T	31-10-2019	IPR019594	Ionotropic glutamate receptor, L-glutamate and glycine-binding domain	GO:0004970|GO:0005234|GO:0016020
Mmel_00006540-RA	5df8a117388eacad3e23d97bfa01b7c9	165	Pfam	PF13499	EF-hand domain pair	99	161	2.1e-14	T	31-10-2019	IPR002048	EF-hand domain	GO:0005509
Mmel_00006540-RA	5df8a117388eacad3e23d97bfa01b7c9	165	Pfam	PF13499	EF-hand domain pair	27	88	2.7e-10	T	31-10-2019	IPR002048	EF-hand domain	GO:0005509
Mmel_00013174-RA	4229aeeeac1db7e64d33cdfa06582328	303	Pfam	PF01148	Cytidylyltransferase family	26	261	3.4e-65	T	31-10-2019
Mmel_00001326-RA	f40c30e5dc532da7c6e4bb61c568854a	358	Pfam	PF00001	7 transmembrane receptor (rhodopsin family)	38	285	8.5e-40	T	31-10-2019	IPR000276	G protein-coupled receptor, rhodopsin-like	GO:0004930|GO:0007186|GO:0016021
Mmel_00013353-RA	4a39c1dfba17e3799ca0db953e23da0a	222	Pfam	PF00104	Ligand-binding domain of nuclear hormone receptor	113	199	6.4e-11	T	31-10-2019	IPR000536	Nuclear hormone receptor, ligand-binding domain		Reactome: R-HSA-383280
Mmel_00007668-RA	497ceb4933da763c277c1cb48e58fb1d	1321	Pfam	PF11933	Cytoplasmic domain of voltage-gated Na+ ion channel	493	706	1.9e-89	T	31-10-2019	IPR024583	Voltage-gated Na+ ion channel, cytoplasmic domain		Reactome: R-HSA-445095|Reactome: R-HSA-5576892
Mmel_00007668-RA	497ceb4933da763c277c1cb48e58fb1d	1321	Pfam	PF06512	Sodium ion transport-associated	994	1200	1.8e-63	T	31-10-2019	IPR010526	Sodium ion transport-associated	GO:0001518|GO:0005248|GO:0006814	Reactome: R-HSA-445095|Reactome: R-HSA-5576892
Mmel_00007668-RA	497ceb4933da763c277c1cb48e58fb1d	1321	Pfam	PF00520	Ion transport protein	111	414	6.2e-81	T	31-10-2019	IPR005821	Ion transport domain	GO:0005216|GO:0006811|GO:0016020|GO:0055085
Mmel_00007668-RA	497ceb4933da763c277c1cb48e58fb1d	1321	Pfam	PF00520	Ion transport protein	757	984	2.9e-55	T	31-10-2019	IPR005821	Ion transport domain	GO:0005216|GO:0006811|GO:0016020|GO:0055085
Mmel_00007668-RA	497ceb4933da763c277c1cb48e58fb1d	1321	Pfam	PF00520	Ion transport protein	1204	1321	8.2e-27	T	31-10-2019	IPR005821	Ion transport domain	GO:0005216|GO:0006811|GO:0016020|GO:0055085
Mmel_00003194-RA	6f6c3beececed4bf4700bc3cf55fe83a	301	Pfam	PF05110	AF-4 proto-oncoprotein	15	99	1.3e-12	T	31-10-2019	IPR007797	Transcription factor AF4/FMR2
Mmel_00008255-RA	2e08dcfabcfa3e4e64bd728911ea58ca	570	Pfam	PF00854	POT family	103	485	3e-41	T	31-10-2019	IPR000109	Proton-dependent oligopeptide transporter family	GO:0016020|GO:0022857|GO:0055085	Reactome: R-HSA-427975
Mmel_00007010-RA	af8482a1f996f11d1a70d459bdc10224	1751	Pfam	PF00520	Ion transport protein	573	794	1.8e-40	T	31-10-2019	IPR005821	Ion transport domain	GO:0005216|GO:0006811|GO:0016020|GO:0055085
Mmel_00007010-RA	af8482a1f996f11d1a70d459bdc10224	1751	Pfam	PF00520	Ion transport protein	997	1243	2.9e-49	T	31-10-2019	IPR005821	Ion transport domain	GO:0005216|GO:0006811|GO:0016020|GO:0055085
Mmel_00007010-RA	af8482a1f996f11d1a70d459bdc10224	1751	Pfam	PF00520	Ion transport protein	159	413	3.6e-66	T	31-10-2019	IPR005821	Ion transport domain	GO:0005216|GO:0006811|GO:0016020|GO:0055085
Mmel_00007010-RA	af8482a1f996f11d1a70d459bdc10224	1751	Pfam	PF00520	Ion transport protein	1292	1543	6.8e-52	T	31-10-2019	IPR005821	Ion transport domain	GO:0005216|GO:0006811|GO:0016020|GO:0055085
Mmel_00007010-RA	af8482a1f996f11d1a70d459bdc10224	1751	Pfam	PF06512	Sodium ion transport-associated	805	993	3.3e-24	T	31-10-2019	IPR010526	Sodium ion transport-associated	GO:0001518|GO:0005248|GO:0006814	Reactome: R-HSA-445095|Reactome: R-HSA-5576892
Mmel_00011519-RA	9bf40711a20e680b0b194f67b92c2589	220	Pfam	PF12036	Protein of unknown function (DUF3522)	5	185	1.8e-51	T	31-10-2019	IPR021910	NGX6/PGAP6/MYMK	GO:0016021
Mmel_00001950-RA	480f6aa8279546c4fc181e38ac15d684	422	Pfam	PF00642	Zinc finger C-x8-C-x5-C-x3-H type (and similar)	93	117	2.7e-06	T	31-10-2019	IPR000571	Zinc finger, CCCH-type	GO:0046872
Mmel_00001950-RA	480f6aa8279546c4fc181e38ac15d684	422	Pfam	PF16543	DRG Family Regulatory Proteins, Tma46	222	306	9.7e-23	T	31-10-2019	IPR032378	ZC3H15/TMA46 family, C-terminal
Mmel_00004833-RA	9459c07128f8a351d166a263f1dae7ba	452	Pfam	PF01770	Reduced folate carrier	1	414	1.4e-158	T	31-10-2019	IPR002666	Reduced folate carrier	GO:0016021|GO:0051180|GO:0090482
Mmel_00012804-RA	ce19ab77f43a7d162034ad36a6314b00	874	Pfam	PF04408	Helicase associated domain (HA2)	588	675	3.8e-15	T	31-10-2019	IPR007502	Helicase-associated domain	GO:0004386
Mmel_00012804-RA	ce19ab77f43a7d162034ad36a6314b00	874	Pfam	PF00271	Helicase conserved C-terminal domain	411	523	5e-14	T	31-10-2019	IPR001650	Helicase, C-terminal
Mmel_00011541-RA	e3975d4471f232ca65a45a2e842a06f2	2953	Pfam	PF12661	Human growth factor-like EGF	477	497	0.0085	T	31-10-2019	IPR013032	EGF-like, conserved site
Mmel_00011541-RA	e3975d4471f232ca65a45a2e842a06f2	2953	Pfam	PF12661	Human growth factor-like EGF	600	619	0.017	T	31-10-2019	IPR013032	EGF-like, conserved site
Mmel_00011541-RA	e3975d4471f232ca65a45a2e842a06f2	2953	Pfam	PF12662	Complement Clr-like EGF-like	570	593	1.7e-09	T	31-10-2019	IPR026823	Complement Clr-like EGF domain
Mmel_00011541-RA	e3975d4471f232ca65a45a2e842a06f2	2953	Pfam	PF07645	Calcium-binding EGF domain	1693	1733	1.3e-05	T	31-10-2019	IPR001881	EGF-like calcium-binding domain	GO:0005509
Mmel_00011541-RA	e3975d4471f232ca65a45a2e842a06f2	2953	Pfam	PF07645	Calcium-binding EGF domain	1651	1688	1.6e-08	T	31-10-2019	IPR001881	EGF-like calcium-binding domain	GO:0005509
Mmel_00011541-RA	e3975d4471f232ca65a45a2e842a06f2	2953	Pfam	PF07645	Calcium-binding EGF domain	2703	2742	2.4e-06	T	31-10-2019	IPR001881	EGF-like calcium-binding domain	GO:0005509
Mmel_00011541-RA	e3975d4471f232ca65a45a2e842a06f2	2953	Pfam	PF07645	Calcium-binding EGF domain	1809	1844	1.5e-09	T	31-10-2019	IPR001881	EGF-like calcium-binding domain	GO:0005509
Mmel_00011541-RA	e3975d4471f232ca65a45a2e842a06f2	2953	Pfam	PF07645	Calcium-binding EGF domain	2297	2336	1.1e-07	T	31-10-2019	IPR001881	EGF-like calcium-binding domain	GO:0005509
Mmel_00011541-RA	e3975d4471f232ca65a45a2e842a06f2	2953	Pfam	PF07645	Calcium-binding EGF domain	1060	1100	6.3e-08	T	31-10-2019	IPR001881	EGF-like calcium-binding domain	GO:0005509
Mmel_00011541-RA	e3975d4471f232ca65a45a2e842a06f2	2953	Pfam	PF07645	Calcium-binding EGF domain	1171	1210	7.5e-08	T	31-10-2019	IPR001881	EGF-like calcium-binding domain	GO:0005509
Mmel_00011541-RA	e3975d4471f232ca65a45a2e842a06f2	2953	Pfam	PF07645	Calcium-binding EGF domain	1935	1971	4.3e-06	T	31-10-2019	IPR001881	EGF-like calcium-binding domain	GO:0005509
Mmel_00011541-RA	e3975d4471f232ca65a45a2e842a06f2	2953	Pfam	PF07645	Calcium-binding EGF domain	507	547	1.2e-08	T	31-10-2019	IPR001881	EGF-like calcium-binding domain	GO:0005509
Mmel_00011541-RA	e3975d4471f232ca65a45a2e842a06f2	2953	Pfam	PF07645	Calcium-binding EGF domain	861	893	6.6e-08	T	31-10-2019	IPR001881	EGF-like calcium-binding domain	GO:0005509
Mmel_00011541-RA	e3975d4471f232ca65a45a2e842a06f2	2953	Pfam	PF07645	Calcium-binding EGF domain	2056	2096	2.5e-07	T	31-10-2019	IPR001881	EGF-like calcium-binding domain	GO:0005509
Mmel_00011541-RA	e3975d4471f232ca65a45a2e842a06f2	2953	Pfam	PF07645	Calcium-binding EGF domain	1533	1572	6.5e-06	T	31-10-2019	IPR001881	EGF-like calcium-binding domain	GO:0005509
Mmel_00011541-RA	e3975d4471f232ca65a45a2e842a06f2	2953	Pfam	PF07645	Calcium-binding EGF domain	724	764	9.1e-08	T	31-10-2019	IPR001881	EGF-like calcium-binding domain	GO:0005509
Mmel_00011541-RA	e3975d4471f232ca65a45a2e842a06f2	2953	Pfam	PF07645	Calcium-binding EGF domain	348	387	1.2e-07	T	31-10-2019	IPR001881	EGF-like calcium-binding domain	GO:0005509
Mmel_00011541-RA	e3975d4471f232ca65a45a2e842a06f2	2953	Pfam	PF07645	Calcium-binding EGF domain	2016	2052	4.2e-08	T	31-10-2019	IPR001881	EGF-like calcium-binding domain	GO:0005509
Mmel_00011541-RA	e3975d4471f232ca65a45a2e842a06f2	2953	Pfam	PF07645	Calcium-binding EGF domain	2338	2380	2.5e-09	T	31-10-2019	IPR001881	EGF-like calcium-binding domain	GO:0005509
Mmel_00011541-RA	e3975d4471f232ca65a45a2e842a06f2	2953	Pfam	PF07645	Calcium-binding EGF domain	2493	2533	1e-09	T	31-10-2019	IPR001881	EGF-like calcium-binding domain	GO:0005509
Mmel_00011541-RA	e3975d4471f232ca65a45a2e842a06f2	2953	Pfam	PF07645	Calcium-binding EGF domain	766	798	4.6e-05	T	31-10-2019	IPR001881	EGF-like calcium-binding domain	GO:0005509
Mmel_00011541-RA	e3975d4471f232ca65a45a2e842a06f2	2953	Pfam	PF07645	Calcium-binding EGF domain	2382	2422	7.8e-07	T	31-10-2019	IPR001881	EGF-like calcium-binding domain	GO:0005509
Mmel_00011541-RA	e3975d4471f232ca65a45a2e842a06f2	2953	Pfam	PF07645	Calcium-binding EGF domain	1492	1531	0.00026	T	31-10-2019	IPR001881	EGF-like calcium-binding domain	GO:0005509
Mmel_00011541-RA	e3975d4471f232ca65a45a2e842a06f2	2953	Pfam	PF07645	Calcium-binding EGF domain	682	722	2.3e-09	T	31-10-2019	IPR001881	EGF-like calcium-binding domain	GO:0005509
Mmel_00011541-RA	e3975d4471f232ca65a45a2e842a06f2	2953	Pfam	PF07645	Calcium-binding EGF domain	1409	1448	1.3e-08	T	31-10-2019	IPR001881	EGF-like calcium-binding domain	GO:0005509
Mmel_00011541-RA	e3975d4471f232ca65a45a2e842a06f2	2953	Pfam	PF07645	Calcium-binding EGF domain	1893	1933	8.6e-07	T	31-10-2019	IPR001881	EGF-like calcium-binding domain	GO:0005509
Mmel_00011541-RA	e3975d4471f232ca65a45a2e842a06f2	2953	Pfam	PF07645	Calcium-binding EGF domain	1116	1156	2.7e-08	T	31-10-2019	IPR001881	EGF-like calcium-binding domain	GO:0005509
Mmel_00011541-RA	e3975d4471f232ca65a45a2e842a06f2	2953	Pfam	PF07645	Calcium-binding EGF domain	988	1016	1.2e-06	T	31-10-2019	IPR001881	EGF-like calcium-binding domain	GO:0005509
Mmel_00011541-RA	e3975d4471f232ca65a45a2e842a06f2	2953	Pfam	PF07645	Calcium-binding EGF domain	1851	1888	1.7e-09	T	31-10-2019	IPR001881	EGF-like calcium-binding domain	GO:0005509
Mmel_00011541-RA	e3975d4471f232ca65a45a2e842a06f2	2953	Pfam	PF07645	Calcium-binding EGF domain	2535	2574	7.5e-09	T	31-10-2019	IPR001881	EGF-like calcium-binding domain	GO:0005509
Mmel_00011541-RA	e3975d4471f232ca65a45a2e842a06f2	2953	Pfam	PF07645	Calcium-binding EGF domain	2215	2249	1.1e-08	T	31-10-2019	IPR001881	EGF-like calcium-binding domain	GO:0005509
Mmel_00011541-RA	e3975d4471f232ca65a45a2e842a06f2	2953	Pfam	PF07645	Calcium-binding EGF domain	1254	1294	6e-07	T	31-10-2019	IPR001881	EGF-like calcium-binding domain	GO:0005509
Mmel_00011541-RA	e3975d4471f232ca65a45a2e842a06f2	2953	Pfam	PF07645	Calcium-binding EGF domain	1018	1050	5.4e-07	T	31-10-2019	IPR001881	EGF-like calcium-binding domain	GO:0005509
Mmel_00011541-RA	e3975d4471f232ca65a45a2e842a06f2	2953	Pfam	PF07645	Calcium-binding EGF domain	2257	2291	3e-06	T	31-10-2019	IPR001881	EGF-like calcium-binding domain	GO:0005509
Mmel_00011541-RA	e3975d4471f232ca65a45a2e842a06f2	2953	Pfam	PF07645	Calcium-binding EGF domain	1212	1252	2.7e-06	T	31-10-2019	IPR001881	EGF-like calcium-binding domain	GO:0005509
Mmel_00011541-RA	e3975d4471f232ca65a45a2e842a06f2	2953	Pfam	PF07645	Calcium-binding EGF domain	2744	2778	1.5e-05	T	31-10-2019	IPR001881	EGF-like calcium-binding domain	GO:0005509
Mmel_00011541-RA	e3975d4471f232ca65a45a2e842a06f2	2953	Pfam	PF07645	Calcium-binding EGF domain	1296	1331	3.8e-10	T	31-10-2019	IPR001881	EGF-like calcium-binding domain	GO:0005509
Mmel_00011541-RA	e3975d4471f232ca65a45a2e842a06f2	2953	Pfam	PF07645	Calcium-binding EGF domain	306	346	2.5e-08	T	31-10-2019	IPR001881	EGF-like calcium-binding domain	GO:0005509
Mmel_00011541-RA	e3975d4471f232ca65a45a2e842a06f2	2953	Pfam	PF07645	Calcium-binding EGF domain	1450	1490	3.5e-07	T	31-10-2019	IPR001881	EGF-like calcium-binding domain	GO:0005509
Mmel_00011541-RA	e3975d4471f232ca65a45a2e842a06f2	2953	Pfam	PF07645	Calcium-binding EGF domain	1974	2014	1.1e-09	T	31-10-2019	IPR001881	EGF-like calcium-binding domain	GO:0005509
Mmel_00011541-RA	e3975d4471f232ca65a45a2e842a06f2	2953	Pfam	PF00683	TB domain	2112	2151	7.3e-09	T	31-10-2019	IPR017878	TB domain
Mmel_00011541-RA	e3975d4471f232ca65a45a2e842a06f2	2953	Pfam	PF00683	TB domain	1594	1637	1.1e-15	T	31-10-2019	IPR017878	TB domain
Mmel_00011541-RA	e3975d4471f232ca65a45a2e842a06f2	2953	Pfam	PF00683	TB domain	1750	1793	7e-16	T	31-10-2019	IPR017878	TB domain
Mmel_00011541-RA	e3975d4471f232ca65a45a2e842a06f2	2953	Pfam	PF00683	TB domain	647	682	1.7e-09	T	31-10-2019	IPR017878	TB domain
Mmel_00011541-RA	e3975d4471f232ca65a45a2e842a06f2	2953	Pfam	PF00683	TB domain	917	961	6.9e-14	T	31-10-2019	IPR017878	TB domain
Mmel_00011541-RA	e3975d4471f232ca65a45a2e842a06f2	2953	Pfam	PF00683	TB domain	254	289	3.3e-08	T	31-10-2019	IPR017878	TB domain
Mmel_00011541-RA	e3975d4471f232ca65a45a2e842a06f2	2953	Pfam	PF00683	TB domain	2442	2484	9.3e-15	T	31-10-2019	IPR017878	TB domain
Mmel_00011541-RA	e3975d4471f232ca65a45a2e842a06f2	2953	Pfam	PF00683	TB domain	820	850	5.1e-08	T	31-10-2019	IPR017878	TB domain
Mmel_00014620-RA	a0444135660a3aee8e4709863e94b401	360	Pfam	PF00025	ADP-ribosylation factor family	9	174	1.8e-62	T	31-10-2019	IPR006689	Small GTPase superfamily, ARF/SAR type	GO:0005525
Mmel_00014620-RA	a0444135660a3aee8e4709863e94b401	360	Pfam	PF03388	Legume-like lectin family	172	333	8.9e-62	T	31-10-2019	IPR005052	Legume-like lectin	GO:0016020	Reactome: R-HSA-204005|Reactome: R-HSA-5694530
Mmel_00010237-RA	ff4f636a25b67f76b618675e5fb39dc1	500	Pfam	PF06818	Fez1	427	497	1.1e-18	T	31-10-2019
Mmel_00010237-RA	ff4f636a25b67f76b618675e5fb39dc1	500	Pfam	PF06818	Fez1	341	402	1.1e-21	T	31-10-2019
Mmel_00010333-RA	910f87675e6c7c89a87c62f946e26430	971	Pfam	PF00069	Protein kinase domain	10	263	8.4e-68	T	31-10-2019	IPR000719	Protein kinase domain	GO:0004672|GO:0005524|GO:0006468
Mmel_00010333-RA	910f87675e6c7c89a87c62f946e26430	971	Pfam	PF12063	Domain of unknown function (DUF3543)	759	965	4.1e-25	T	31-10-2019	IPR022708	Serine/threonine-protein kinase, C-terminal	GO:0004674	KEGG: 04150+2.7.11.1|KEGG: 04151+2.7.11.1|KEGG: 04714+2.7.11.1|KEGG: 04926+2.7.11.1|KEGG: 05165+2.7.11.1
Mmel_00003181-RA	0d86ea238c09fab413a7f8c82617e221	678	Pfam	PF13927	Immunoglobulin domain	127	210	2.2e-11	T	31-10-2019
Mmel_00003181-RA	0d86ea238c09fab413a7f8c82617e221	678	Pfam	PF07714	Protein tyrosine kinase	338	614	5.7e-104	T	31-10-2019	IPR001245	Serine-threonine/tyrosine-protein kinase, catalytic domain	GO:0004672|GO:0006468
Mmel_00003181-RA	0d86ea238c09fab413a7f8c82617e221	678	Pfam	PF07679	Immunoglobulin I-set domain	33	112	4.3e-14	T	31-10-2019	IPR013098	Immunoglobulin I-set
Mmel_00006039-RA	fd84251a1e9f1e26b703a9cfb701f19b	360	Pfam	PF10602	26S proteasome subunit RPN7	37	210	1.8e-61	T	31-10-2019	IPR019585	26S proteasome regulatory subunit Rpn7/COP9 signalosome complex subunit 1		Reactome: R-HSA-8951664
Mmel_00006039-RA	fd84251a1e9f1e26b703a9cfb701f19b	360	Pfam	PF01399	PCI domain	225	328	9.8e-18	T	31-10-2019	IPR000717	Proteasome component (PCI) domain
Mmel_00003449-RA	203f004e8c54e2e1807c0eddcd401a65	1752	Pfam	PF00053	Laminin EGF domain	79	112	1.8e-06	T	31-10-2019	IPR002049	Laminin EGF domain
Mmel_00003449-RA	203f004e8c54e2e1807c0eddcd401a65	1752	Pfam	PF00053	Laminin EGF domain	17	55	1.1e-06	T	31-10-2019	IPR002049	Laminin EGF domain
Mmel_00003449-RA	203f004e8c54e2e1807c0eddcd401a65	1752	Pfam	PF00053	Laminin EGF domain	115	166	3.6e-11	T	31-10-2019	IPR002049	Laminin EGF domain
Mmel_00003449-RA	203f004e8c54e2e1807c0eddcd401a65	1752	Pfam	PF02210	Laminin G domain	1605	1729	9.1e-23	T	31-10-2019	IPR001791	Laminin G domain
Mmel_00003449-RA	203f004e8c54e2e1807c0eddcd401a65	1752	Pfam	PF02210	Laminin G domain	1191	1304	4.2e-17	T	31-10-2019	IPR001791	Laminin G domain
Mmel_00003449-RA	203f004e8c54e2e1807c0eddcd401a65	1752	Pfam	PF02210	Laminin G domain	1009	1136	1.3e-14	T	31-10-2019	IPR001791	Laminin G domain
Mmel_00003449-RA	203f004e8c54e2e1807c0eddcd401a65	1752	Pfam	PF02210	Laminin G domain	1428	1555	2.9e-21	T	31-10-2019	IPR001791	Laminin G domain
Mmel_00003449-RA	203f004e8c54e2e1807c0eddcd401a65	1752	Pfam	PF02210	Laminin G domain	811	942	1.7e-05	T	31-10-2019	IPR001791	Laminin G domain
Mmel_00003449-RA	203f004e8c54e2e1807c0eddcd401a65	1752	Pfam	PF06008	Laminin Domain I	227	478	5.4e-33	T	31-10-2019	IPR009254	Laminin alpha, domain I	GO:0005102|GO:0030155|GO:0030334|GO:0045995	Reactome: R-HSA-3000157|Reactome: R-HSA-3000171|Reactome: R-HSA-3000178|Reactome: R-HSA-8874081
Mmel_00003449-RA	203f004e8c54e2e1807c0eddcd401a65	1752	Pfam	PF06009	Laminin Domain II	665	790	1.7e-32	T	31-10-2019	IPR010307	Laminin domain II	GO:0007155	Reactome: R-HSA-3000157|Reactome: R-HSA-3000171|Reactome: R-HSA-3000178|Reactome: R-HSA-8874081
Mmel_00012847-RA	7e739951111e24389c9622c95ffc3df7	145	Pfam	PF01759	UNC-6/NTR/C345C module	31	127	1.2e-14	T	31-10-2019	IPR018933	Netrin module, non-TIMP type
Mmel_00013298-RA	c24638475cdde7702673bd917f534361	423	Pfam	PF01733	Nucleoside transporter	313	420	4.1e-30	T	31-10-2019	IPR002259	Equilibrative nucleoside transporter	GO:0005337|GO:0016021|GO:1901642	Reactome: R-HSA-83936
Mmel_00013298-RA	c24638475cdde7702673bd917f534361	423	Pfam	PF01733	Nucleoside transporter	154	241	4e-16	T	31-10-2019	IPR002259	Equilibrative nucleoside transporter	GO:0005337|GO:0016021|GO:1901642	Reactome: R-HSA-83936
Mmel_00012517-RA	7b1ac098305020d96443adaac1f047b4	1001	Pfam	PF02844	Phosphoribosylglycinamide synthetase, N domain	4	104	5e-36	T	31-10-2019	IPR020562	Phosphoribosylglycinamide synthetase, N-terminal	GO:0004637|GO:0009113	KEGG: 00230+6.3.4.13|MetaCyc: PWY-6121|MetaCyc: PWY-6122|MetaCyc: PWY-6277|Reactome: R-HSA-73817
Mmel_00012517-RA	7b1ac098305020d96443adaac1f047b4	1001	Pfam	PF00586	AIR synthase related protein, N-terminal domain	490	567	3.2e-12	T	31-10-2019	IPR016188	PurM-like, N-terminal domain
Mmel_00012517-RA	7b1ac098305020d96443adaac1f047b4	1001	Pfam	PF02843	Phosphoribosylglycinamide synthetase, C domain	334	424	1.2e-27	T	31-10-2019	IPR020560	Phosphoribosylglycinamide synthetase, C-domain	GO:0004637|GO:0009113	KEGG: 00230+6.3.4.13|MetaCyc: PWY-6121|MetaCyc: PWY-6122|MetaCyc: PWY-6277|Reactome: R-HSA-73817
Mmel_00012517-RA	7b1ac098305020d96443adaac1f047b4	1001	Pfam	PF02769	AIR synthase related protein, C-terminal domain	605	768	5.3e-38	T	31-10-2019	IPR010918	PurM-like, C-terminal domain
Mmel_00012517-RA	7b1ac098305020d96443adaac1f047b4	1001	Pfam	PF00551	Formyl transferase	802	982	1.8e-67	T	31-10-2019	IPR002376	Formyl transferase, N-terminal	GO:0009058|GO:0016742	KEGG: 00670+2.1.2.9|KEGG: 00970+2.1.2.9
Mmel_00012517-RA	7b1ac098305020d96443adaac1f047b4	1001	Pfam	PF01071	Phosphoribosylglycinamide synthetase, ATP-grasp (A) domain	105	298	1.1e-90	T	31-10-2019	IPR020561	Phosphoribosylglycinamide synthetase, ATP-grasp (A) domain		KEGG: 00230+6.3.4.13|MetaCyc: PWY-6121|MetaCyc: PWY-6122|MetaCyc: PWY-6277|Reactome: R-HSA-73817
Mmel_00002242-RA	75090910274e5efc930f3f9974a781ca	237	Pfam	PF01569	PAP2 superfamily	45	194	6.4e-22	T	31-10-2019	IPR000326	Phosphatidic acid phosphatase type 2/haloperoxidase
Mmel_00011328-RA	3d5e9e512f4d859a3e6583059da0a0b7	827	Pfam	PF09238	Interleukin-4 receptor alpha chain, N-terminal	52	142	4.8e-26	T	31-10-2019	IPR015319	Interleukin-4 receptor alpha, N-terminal	GO:0002532|GO:0004896|GO:0016021	Reactome: R-HSA-6785807
Mmel_00014592-RA	e74b04ed15badd704ae80a9911571402	561	Pfam	PF12062	heparan sulfate-N-deacetylase	1	222	2e-124	T	31-10-2019	IPR021930	Heparan sulphate-N-deacetylase	GO:0015016|GO:0016787	MetaCyc: PWY-6558|Reactome: R-HSA-2022928
Mmel_00014592-RA	e74b04ed15badd704ae80a9911571402	561	Pfam	PF00685	Sulfotransferase domain	304	537	1.1e-34	T	31-10-2019	IPR000863	Sulfotransferase domain	GO:0008146
Mmel_00004590-RA	1ce092e7fe79deb628d6ff7c1aada456	760	Pfam	PF01067	Calpain large subunit, domain III	429	571	2.8e-55	T	31-10-2019	IPR022682	Peptidase C2, calpain, large subunit, domain III		Reactome: R-HSA-1474228
Mmel_00004590-RA	1ce092e7fe79deb628d6ff7c1aada456	760	Pfam	PF13833	EF-hand domain pair	645	664	0.0017	T	31-10-2019	IPR002048	EF-hand domain	GO:0005509
Mmel_00004590-RA	1ce092e7fe79deb628d6ff7c1aada456	760	Pfam	PF13202	EF hand	736	749	0.14	T	31-10-2019	IPR002048	EF-hand domain	GO:0005509
Mmel_00004590-RA	1ce092e7fe79deb628d6ff7c1aada456	760	Pfam	PF16648	Unstructured region on Calpain-3	576	636	4.8e-21	T	31-10-2019
Mmel_00004590-RA	1ce092e7fe79deb628d6ff7c1aada456	760	Pfam	PF00648	Calpain family cysteine protease	69	408	2.5e-138	T	31-10-2019	IPR001300	Peptidase C2, calpain, catalytic domain	GO:0004198|GO:0005622|GO:0006508	Reactome: R-HSA-1474228
Mmel_00005144-RA	be9cceb16e1de6604477450ac14d5f0a	2022	Pfam	PF02210	Laminin G domain	1604	1744	6e-19	T	31-10-2019	IPR001791	Laminin G domain
Mmel_00005144-RA	be9cceb16e1de6604477450ac14d5f0a	2022	Pfam	PF02210	Laminin G domain	1848	1954	2.7e-12	T	31-10-2019	IPR001791	Laminin G domain
Mmel_00005144-RA	be9cceb16e1de6604477450ac14d5f0a	2022	Pfam	PF00008	EGF-like domain	1506	1536	3.8e-07	T	31-10-2019	IPR000742	EGF-like domain
Mmel_00005144-RA	be9cceb16e1de6604477450ac14d5f0a	2022	Pfam	PF12661	Human growth factor-like EGF	1549	1567	0.019	T	31-10-2019	IPR013032	EGF-like, conserved site
Mmel_00005144-RA	be9cceb16e1de6604477450ac14d5f0a	2022	Pfam	PF12661	Human growth factor-like EGF	1773	1793	0.032	T	31-10-2019	IPR013032	EGF-like, conserved site
Mmel_00005144-RA	be9cceb16e1de6604477450ac14d5f0a	2022	Pfam	PF00028	Cadherin domain	379	464	1.3e-15	T	31-10-2019	IPR002126	Cadherin	GO:0005509|GO:0007156|GO:0016020
Mmel_00005144-RA	be9cceb16e1de6604477450ac14d5f0a	2022	Pfam	PF00028	Cadherin domain	1117	1206	6.6e-16	T	31-10-2019	IPR002126	Cadherin	GO:0005509|GO:0007156|GO:0016020
Mmel_00005144-RA	be9cceb16e1de6604477450ac14d5f0a	2022	Pfam	PF00028	Cadherin domain	697	786	6.6e-22	T	31-10-2019	IPR002126	Cadherin	GO:0005509|GO:0007156|GO:0016020
Mmel_00005144-RA	be9cceb16e1de6604477450ac14d5f0a	2022	Pfam	PF00028	Cadherin domain	8	65	9.1e-10	T	31-10-2019	IPR002126	Cadherin	GO:0005509|GO:0007156|GO:0016020
Mmel_00005144-RA	be9cceb16e1de6604477450ac14d5f0a	2022	Pfam	PF00028	Cadherin domain	1011	1102	2.1e-20	T	31-10-2019	IPR002126	Cadherin	GO:0005509|GO:0007156|GO:0016020
Mmel_00005144-RA	be9cceb16e1de6604477450ac14d5f0a	2022	Pfam	PF00028	Cadherin domain	175	261	2.1e-13	T	31-10-2019	IPR002126	Cadherin	GO:0005509|GO:0007156|GO:0016020
Mmel_00005144-RA	be9cceb16e1de6604477450ac14d5f0a	2022	Pfam	PF00028	Cadherin domain	594	682	7.1e-13	T	31-10-2019	IPR002126	Cadherin	GO:0005509|GO:0007156|GO:0016020
Mmel_00005144-RA	be9cceb16e1de6604477450ac14d5f0a	2022	Pfam	PF00028	Cadherin domain	278	366	4.2e-24	T	31-10-2019	IPR002126	Cadherin	GO:0005509|GO:0007156|GO:0016020
Mmel_00005144-RA	be9cceb16e1de6604477450ac14d5f0a	2022	Pfam	PF00028	Cadherin domain	905	997	1.3e-14	T	31-10-2019	IPR002126	Cadherin	GO:0005509|GO:0007156|GO:0016020
Mmel_00005144-RA	be9cceb16e1de6604477450ac14d5f0a	2022	Pfam	PF00028	Cadherin domain	804	890	1.1e-19	T	31-10-2019	IPR002126	Cadherin	GO:0005509|GO:0007156|GO:0016020
Mmel_00005144-RA	be9cceb16e1de6604477450ac14d5f0a	2022	Pfam	PF00028	Cadherin domain	481	575	3.9e-15	T	31-10-2019	IPR002126	Cadherin	GO:0005509|GO:0007156|GO:0016020
Mmel_00005144-RA	be9cceb16e1de6604477450ac14d5f0a	2022	Pfam	PF00028	Cadherin domain	83	158	2e-11	T	31-10-2019	IPR002126	Cadherin	GO:0005509|GO:0007156|GO:0016020
Mmel_00005144-RA	be9cceb16e1de6604477450ac14d5f0a	2022	Pfam	PF07645	Calcium-binding EGF domain	1464	1495	1e-07	T	31-10-2019	IPR001881	EGF-like calcium-binding domain	GO:0005509
Mmel_00006000-RA	2dbb89e948de85e0aa17390fa5f40de3	799	Pfam	PF13912	C2H2-type zinc finger	207	230	2.9e-05	T	31-10-2019
Mmel_00006000-RA	2dbb89e948de85e0aa17390fa5f40de3	799	Pfam	PF00096	Zinc finger, C2H2 type	234	256	0.00066	T	31-10-2019
Mmel_00006000-RA	2dbb89e948de85e0aa17390fa5f40de3	799	Pfam	PF00096	Zinc finger, C2H2 type	349	368	0.00038	T	31-10-2019
Mmel_00006000-RA	2dbb89e948de85e0aa17390fa5f40de3	799	Pfam	PF00096	Zinc finger, C2H2 type	262	285	2.7e-06	T	31-10-2019
Mmel_00006000-RA	2dbb89e948de85e0aa17390fa5f40de3	799	Pfam	PF00096	Zinc finger, C2H2 type	319	341	0.007	T	31-10-2019
Mmel_00006000-RA	2dbb89e948de85e0aa17390fa5f40de3	799	Pfam	PF00096	Zinc finger, C2H2 type	291	313	0.00081	T	31-10-2019
Mmel_00006514-RA	e4fe30aa8917d746f5e31ddd7ecddc1d	407	Pfam	PF09325	Vps5 C terminal like	198	370	2.9e-60	T	31-10-2019	IPR015404	Sorting nexin Vps5-like, C-terminal
Mmel_00006514-RA	e4fe30aa8917d746f5e31ddd7ecddc1d	407	Pfam	PF03700	Sorting nexin, N-terminal domain	2	148	1.9e-23	T	31-10-2019	IPR005329	Sorting nexin, N-terminal	GO:0006886
Mmel_00013472-RA	e45bcd851a4501faff2dc6383c0067a8	2678	Pfam	PF00076	RNA recognition motif. (a.k.a. RRM, RBD, or RNP domain)	47	114	5.4e-05	T	31-10-2019	IPR000504	RNA recognition motif domain	GO:0003676
Mmel_00013472-RA	e45bcd851a4501faff2dc6383c0067a8	2678	Pfam	PF00076	RNA recognition motif. (a.k.a. RRM, RBD, or RNP domain)	228	291	1.4e-08	T	31-10-2019	IPR000504	RNA recognition motif domain	GO:0003676
Mmel_00013472-RA	e45bcd851a4501faff2dc6383c0067a8	2678	Pfam	PF00076	RNA recognition motif. (a.k.a. RRM, RBD, or RNP domain)	148	215	4.1e-12	T	31-10-2019	IPR000504	RNA recognition motif domain	GO:0003676
Mmel_00013472-RA	e45bcd851a4501faff2dc6383c0067a8	2678	Pfam	PF07744	SPOC domain	2515	2673	8.4e-38	T	31-10-2019	IPR012921	Spen paralogue and orthologue SPOC, C-terminal
Mmel_00005086-RA	57823ddc4c871c22965b5a4bfc4ac089	1699	Pfam	PF00880	Nebulin repeat	730	757	7.4e-05	T	31-10-2019	IPR000900	Nebulin repeat
Mmel_00005086-RA	57823ddc4c871c22965b5a4bfc4ac089	1699	Pfam	PF00880	Nebulin repeat	314	341	4.4e-06	T	31-10-2019	IPR000900	Nebulin repeat
Mmel_00005086-RA	57823ddc4c871c22965b5a4bfc4ac089	1699	Pfam	PF00880	Nebulin repeat	1218	1240	0.0002	T	31-10-2019	IPR000900	Nebulin repeat
Mmel_00005086-RA	57823ddc4c871c22965b5a4bfc4ac089	1699	Pfam	PF00880	Nebulin repeat	1009	1037	8.4e-05	T	31-10-2019	IPR000900	Nebulin repeat
Mmel_00005086-RA	57823ddc4c871c22965b5a4bfc4ac089	1699	Pfam	PF00880	Nebulin repeat	492	518	7.7e-09	T	31-10-2019	IPR000900	Nebulin repeat
Mmel_00005086-RA	57823ddc4c871c22965b5a4bfc4ac089	1699	Pfam	PF00880	Nebulin repeat	1459	1487	0.00015	T	31-10-2019	IPR000900	Nebulin repeat
Mmel_00005086-RA	57823ddc4c871c22965b5a4bfc4ac089	1699	Pfam	PF00880	Nebulin repeat	808	831	1.3e-05	T	31-10-2019	IPR000900	Nebulin repeat
Mmel_00005086-RA	57823ddc4c871c22965b5a4bfc4ac089	1699	Pfam	PF00880	Nebulin repeat	565	590	9.9e-08	T	31-10-2019	IPR000900	Nebulin repeat
Mmel_00005086-RA	57823ddc4c871c22965b5a4bfc4ac089	1699	Pfam	PF00880	Nebulin repeat	770	794	4.5e-07	T	31-10-2019	IPR000900	Nebulin repeat
Mmel_00005086-RA	57823ddc4c871c22965b5a4bfc4ac089	1699	Pfam	PF00880	Nebulin repeat	1598	1627	4.1e-06	T	31-10-2019	IPR000900	Nebulin repeat
Mmel_00005086-RA	57823ddc4c871c22965b5a4bfc4ac089	1699	Pfam	PF00880	Nebulin repeat	207	235	7.2e-08	T	31-10-2019	IPR000900	Nebulin repeat
Mmel_00005086-RA	57823ddc4c871c22965b5a4bfc4ac089	1699	Pfam	PF00880	Nebulin repeat	528	554	2.1e-08	T	31-10-2019	IPR000900	Nebulin repeat
Mmel_00005086-RA	57823ddc4c871c22965b5a4bfc4ac089	1699	Pfam	PF00880	Nebulin repeat	244	272	2.9e-05	T	31-10-2019	IPR000900	Nebulin repeat
Mmel_00005086-RA	57823ddc4c871c22965b5a4bfc4ac089	1699	Pfam	PF00412	LIM domain	6	57	7.1e-10	T	31-10-2019	IPR001781	Zinc finger, LIM-type
Mmel_00000090-RA	e75503feadff6ea816636170e7997bc2	906	Pfam	PF00412	LIM domain	201	260	2e-09	T	31-10-2019	IPR001781	Zinc finger, LIM-type
Mmel_00000090-RA	e75503feadff6ea816636170e7997bc2	906	Pfam	PF00412	LIM domain	326	379	2.3e-05	T	31-10-2019	IPR001781	Zinc finger, LIM-type
Mmel_00000090-RA	e75503feadff6ea816636170e7997bc2	906	Pfam	PF00412	LIM domain	266	320	2.4e-09	T	31-10-2019	IPR001781	Zinc finger, LIM-type
Mmel_00000090-RA	e75503feadff6ea816636170e7997bc2	906	Pfam	PF06297	PET Domain	106	190	1.3e-38	T	31-10-2019	IPR010442	PET domain	GO:0008270
Mmel_00000349-RA	48dae5b5faccef79ddd2a3d214aa867e	302	Pfam	PF02338	OTU-like cysteine protease	162	287	2.4e-32	T	31-10-2019	IPR003323	OTU domain
Mmel_00013536-RA	dcdf6910d3a882a2e82fc0b467de7aac	606	Pfam	PF14492	Elongation Factor G, domain II	491	553	2.4e-13	T	31-10-2019
Mmel_00013536-RA	dcdf6910d3a882a2e82fc0b467de7aac	606	Pfam	PF00009	Elongation factor Tu GTP binding domain	6	347	2.7e-65	T	31-10-2019	IPR000795	Transcription factor, GTP-binding domain	GO:0003924|GO:0005525
Mmel_00013536-RA	dcdf6910d3a882a2e82fc0b467de7aac	606	Pfam	PF03144	Elongation factor Tu domain 2	398	473	7.9e-13	T	31-10-2019	IPR004161	Translation elongation factor EFTu-like, domain 2	GO:0005525
Mmel_00008925-RA	1865a820bc8583804121fab34c264ea3	1625	Pfam	PF00168	C2 domain	1247	1340	2.3e-08	T	31-10-2019	IPR000008	C2 domain
Mmel_00008925-RA	1865a820bc8583804121fab34c264ea3	1625	Pfam	PF00388	Phosphatidylinositol-specific phospholipase C, X domain	812	957	1.4e-59	T	31-10-2019	IPR000909	Phosphatidylinositol-specific phospholipase C, X domain
Mmel_00008925-RA	1865a820bc8583804121fab34c264ea3	1625	Pfam	PF09279	Phosphoinositide-specific phospholipase C, efhand-like	742	794	7.2e-05	T	31-10-2019	IPR015359	Phosphoinositide-specific phospholipase C, EF-hand-like domain		KEGG: 00562+3.1.4.11|KEGG: 04070+3.1.4.11|MetaCyc: PWY-6351|MetaCyc: PWY-6367|MetaCyc: PWY-7039|Reactome: R-HSA-1855204
Mmel_00008925-RA	1865a820bc8583804121fab34c264ea3	1625	Pfam	PF00788	Ras association (RalGDS/AF-6) domain	1469	1571	4.6e-18	T	31-10-2019	IPR000159	Ras-associating (RA) domain	GO:0007165
Mmel_00008925-RA	1865a820bc8583804121fab34c264ea3	1625	Pfam	PF00387	Phosphatidylinositol-specific phospholipase C, Y domain	1084	1218	2.6e-35	T	31-10-2019	IPR001711	Phospholipase C, phosphatidylinositol-specific, Y domain	GO:0004435|GO:0006629|GO:0007165|GO:0035556	KEGG: 00562+3.1.4.11|KEGG: 04070+3.1.4.11|MetaCyc: PWY-6351|MetaCyc: PWY-6367|MetaCyc: PWY-7039|Reactome: R-HSA-1855204
Mmel_00008925-RA	1865a820bc8583804121fab34c264ea3	1625	Pfam	PF00617	RasGEF domain	53	237	5.4e-24	T	31-10-2019	IPR001895	Ras guanine-nucleotide exchange factors catalytic domain	GO:0005085|GO:0007264
Mmel_00012064-RA	b906328e6fb577b9423737645744630c	1091	Pfam	PF00620	RhoGAP domain	318	462	2.7e-34	T	31-10-2019	IPR000198	Rho GTPase-activating protein domain	GO:0007165	Reactome: R-HSA-194840
Mmel_00012064-RA	b906328e6fb577b9423737645744630c	1091	Pfam	PF00788	Ras association (RalGDS/AF-6) domain	145	215	7.8e-05	T	31-10-2019	IPR000159	Ras-associating (RA) domain	GO:0007165
Mmel_00008856-RA	8db21d742637e5e7fbdeb96e17b61ed9	371	Pfam	PF13506	Glycosyl transferase family 21	83	255	2.6e-60	T	31-10-2019	IPR025993	Ceramide glucosyltransferase	GO:0016757	KEGG: 00600+2.4.1.80|MetaCyc: PWY-5129|MetaCyc: PWY-7836|MetaCyc: PWY-7838|MetaCyc: PWY-7839|MetaCyc: PWY-7841|Reactome: R-HSA-1660662
Mmel_00003001-RA	38171d10247149365846ffbcaf402b78	480	Pfam	PF14671	Dual specificity protein phosphatase, N-terminal half	1	136	1.2e-54	T	31-10-2019	IPR029260	Dual specificity/tyrosine protein phosphatase, N-terminal
Mmel_00003001-RA	38171d10247149365846ffbcaf402b78	480	Pfam	PF00782	Dual specificity phosphatase, catalytic domain	242	307	1.3e-14	T	31-10-2019	IPR000340	Dual specificity phosphatase, catalytic domain	GO:0008138|GO:0016311
Mmel_00002923-RA	4d3ff7aa5d644e363d847fa998b4eec3	1264	Pfam	PF00066	LNR domain	438	470	5.7e-09	T	31-10-2019	IPR000800	Notch domain
Mmel_00002923-RA	4d3ff7aa5d644e363d847fa998b4eec3	1264	Pfam	PF00066	LNR domain	506	537	6.1e-06	T	31-10-2019	IPR000800	Notch domain
Mmel_00002923-RA	4d3ff7aa5d644e363d847fa998b4eec3	1264	Pfam	PF06464	DMAP1-binding Domain	702	769	1.6e-12	T	31-10-2019	IPR010506	DMAP1-binding domain
Mmel_00002923-RA	4d3ff7aa5d644e363d847fa998b4eec3	1264	Pfam	PF17101	Stealth protein CR1, conserved region 1	75	102	1.9e-11	T	31-10-2019	IPR031358	Stealth protein CR1, conserved region 1
Mmel_00002923-RA	4d3ff7aa5d644e363d847fa998b4eec3	1264	Pfam	PF17102	Stealth protein CR3, conserved region 3	959	1007	1.5e-18	T	31-10-2019	IPR031357	Stealth protein CR3, conserved region 3
Mmel_00002923-RA	4d3ff7aa5d644e363d847fa998b4eec3	1264	Pfam	PF11380	Stealth protein CR2, conserved region 2	324	430	1.8e-45	T	31-10-2019	IPR021520	Stealth protein CR2, conserved region 2	GO:0016772
Mmel_00002923-RA	4d3ff7aa5d644e363d847fa998b4eec3	1264	Pfam	PF17103	Stealth protein CR4, conserved region 4	1142	1198	1.6e-24	T	31-10-2019	IPR031356	Stealth protein CR4, conserved region 4
Mmel_00004687-RA	7692e25e088c43ed7b2a7123ff20301f	554	Pfam	PF06459	Ryanodine Receptor TM 4-6	505	554	1.4e-07	T	31-10-2019	IPR009460	Ryanodine Receptor TM 4-6	GO:0005219|GO:0006874|GO:0016021	Reactome: R-HSA-2672351|Reactome: R-HSA-5578775
Mmel_00004687-RA	7692e25e088c43ed7b2a7123ff20301f	554	Pfam	PF08454	RyR and IP3R Homology associated	55	130	1.1e-10	T	31-10-2019	IPR013662	RyR/IP3R Homology associated domain		Reactome: R-HSA-5578775
Mmel_00007919-RA	0e5d38721c297addadd4d79c0c3287ea	530	Pfam	PF00076	RNA recognition motif. (a.k.a. RRM, RBD, or RNP domain)	29	90	2.8e-05	T	31-10-2019	IPR000504	RNA recognition motif domain	GO:0003676
Mmel_00007919-RA	0e5d38721c297addadd4d79c0c3287ea	530	Pfam	PF05958	tRNA (Uracil-5-)-methyltransferase	302	477	3.9e-16	T	31-10-2019	IPR010280	(Uracil-5)-methyltransferase family	GO:0006396|GO:0008173
Mmel_00014067-RA	b69566748f3dbfda15513e8c29b9c266	281	Pfam	PF01384	Phosphate transporter family	121	267	4.8e-60	T	31-10-2019	IPR001204	Phosphate transporter	GO:0005315|GO:0006817|GO:0016020	Reactome: R-HSA-427652
Mmel_00005900-RA	bad2ef68f199eec344a4f2fffff41395	277	Pfam	PF01026	TatD related DNase	13	80	3.9e-13	T	31-10-2019	IPR001130	TatD family	GO:0016788
Mmel_00005900-RA	bad2ef68f199eec344a4f2fffff41395	277	Pfam	PF08641	Kinetochore protein Mis14 like	77	192	2.7e-20	T	31-10-2019	IPR013950	Kinetochore Mis14/Nsl1	GO:0000070|GO:0000776	Reactome: R-HSA-141444|Reactome: R-HSA-2467813|Reactome: R-HSA-2500257|Reactome: R-HSA-5663220|Reactome: R-HSA-68877
Mmel_00004842-RA	bf792a4aa08adb6ad5f92446abdaee3a	1171	Pfam	PF16625	Unstructured linking region I-set and fnIII on Brother of CDO	471	534	3.8e-22	T	31-10-2019
Mmel_00004842-RA	bf792a4aa08adb6ad5f92446abdaee3a	1171	Pfam	PF00047	Immunoglobulin domain	199	271	1.4e-05	T	31-10-2019	IPR013151	Immunoglobulin
Mmel_00004842-RA	bf792a4aa08adb6ad5f92446abdaee3a	1171	Pfam	PF13927	Immunoglobulin domain	99	171	1.5e-07	T	31-10-2019
Mmel_00004842-RA	bf792a4aa08adb6ad5f92446abdaee3a	1171	Pfam	PF13927	Immunoglobulin domain	293	365	3.8e-14	T	31-10-2019
Mmel_00004842-RA	bf792a4aa08adb6ad5f92446abdaee3a	1171	Pfam	PF00041	Fibronectin type III domain	547	618	5.1e-10	T	31-10-2019	IPR003961	Fibronectin type III	GO:0005515
Mmel_00004842-RA	bf792a4aa08adb6ad5f92446abdaee3a	1171	Pfam	PF00041	Fibronectin type III domain	778	861	4e-07	T	31-10-2019	IPR003961	Fibronectin type III	GO:0005515
Mmel_00004842-RA	bf792a4aa08adb6ad5f92446abdaee3a	1171	Pfam	PF00041	Fibronectin type III domain	667	752	3.5e-13	T	31-10-2019	IPR003961	Fibronectin type III	GO:0005515
Mmel_00004842-RA	bf792a4aa08adb6ad5f92446abdaee3a	1171	Pfam	PF07679	Immunoglobulin I-set domain	385	468	2.1e-17	T	31-10-2019	IPR013098	Immunoglobulin I-set
Mmel_00007590-RA	c303b9ece1d67874fc129912b8850df4	219	Pfam	PF07679	Immunoglobulin I-set domain	133	218	1.1e-24	T	31-10-2019	IPR013098	Immunoglobulin I-set
Mmel_00007590-RA	c303b9ece1d67874fc129912b8850df4	219	Pfam	PF13927	Immunoglobulin domain	45	115	9.1e-14	T	31-10-2019
Mmel_00008728-RA	679a698622ee6c88fda82b0662240741	309	Pfam	PF00017	SH2 domain	214	288	4.4e-22	T	31-10-2019	IPR000980	SH2 domain
Mmel_00008728-RA	679a698622ee6c88fda82b0662240741	309	Pfam	PF00018	SH3 domain	132	178	4e-14	T	31-10-2019	IPR001452	SH3 domain	GO:0005515
Mmel_00008728-RA	679a698622ee6c88fda82b0662240741	309	Pfam	PF14604	Variant SH3 domain	47	94	1.7e-14	T	31-10-2019	IPR001452	SH3 domain	GO:0005515
Mmel_00005282-RA	4efe3daae8b56517c7a9095377001b10	1231	Pfam	PF00621	RhoGEF domain	852	1035	2.4e-37	T	31-10-2019	IPR000219	Dbl homology (DH) domain	GO:0005089|GO:0035023
Mmel_00007656-RA	be1f8dee5db01852d54bdc87dd35b450	4635	Pfam	PF07645	Calcium-binding EGF domain	1377	1413	4.9e-05	T	31-10-2019	IPR001881	EGF-like calcium-binding domain	GO:0005509
Mmel_00007656-RA	be1f8dee5db01852d54bdc87dd35b450	4635	Pfam	PF00058	Low-density lipoprotein receptor repeat class B	3379	3418	1.2e-07	T	31-10-2019	IPR000033	LDLR class B repeat
Mmel_00007656-RA	be1f8dee5db01852d54bdc87dd35b450	4635	Pfam	PF00058	Low-density lipoprotein receptor repeat class B	1870	1915	3.5e-08	T	31-10-2019	IPR000033	LDLR class B repeat
Mmel_00007656-RA	be1f8dee5db01852d54bdc87dd35b450	4635	Pfam	PF00058	Low-density lipoprotein receptor repeat class B	3335	3376	2.8e-10	T	31-10-2019	IPR000033	LDLR class B repeat
Mmel_00007656-RA	be1f8dee5db01852d54bdc87dd35b450	4635	Pfam	PF00058	Low-density lipoprotein receptor repeat class B	3242	3281	2.4e-05	T	31-10-2019	IPR000033	LDLR class B repeat
Mmel_00007656-RA	be1f8dee5db01852d54bdc87dd35b450	4635	Pfam	PF00058	Low-density lipoprotein receptor repeat class B	1598	1638	0.00023	T	31-10-2019	IPR000033	LDLR class B repeat
Mmel_00007656-RA	be1f8dee5db01852d54bdc87dd35b450	4635	Pfam	PF00058	Low-density lipoprotein receptor repeat class B	2189	2230	2.9e-05	T	31-10-2019	IPR000033	LDLR class B repeat
Mmel_00007656-RA	be1f8dee5db01852d54bdc87dd35b450	4635	Pfam	PF00058	Low-density lipoprotein receptor repeat class B	468	506	4.2e-06	T	31-10-2019	IPR000033	LDLR class B repeat
Mmel_00007656-RA	be1f8dee5db01852d54bdc87dd35b450	4635	Pfam	PF00058	Low-density lipoprotein receptor repeat class B	1465	1505	5e-05	T	31-10-2019	IPR000033	LDLR class B repeat
Mmel_00007656-RA	be1f8dee5db01852d54bdc87dd35b450	4635	Pfam	PF00058	Low-density lipoprotein receptor repeat class B	509	553	0.00013	T	31-10-2019	IPR000033	LDLR class B repeat
Mmel_00007656-RA	be1f8dee5db01852d54bdc87dd35b450	4635	Pfam	PF00058	Low-density lipoprotein receptor repeat class B	4172	4213	1.6e-10	T	31-10-2019	IPR000033	LDLR class B repeat
Mmel_00007656-RA	be1f8dee5db01852d54bdc87dd35b450	4635	Pfam	PF00058	Low-density lipoprotein receptor repeat class B	4129	4167	3.1e-06	T	31-10-2019	IPR000033	LDLR class B repeat
Mmel_00007656-RA	be1f8dee5db01852d54bdc87dd35b450	4635	Pfam	PF00058	Low-density lipoprotein receptor repeat class B	825	866	1.3e-07	T	31-10-2019	IPR000033	LDLR class B repeat
Mmel_00007656-RA	be1f8dee5db01852d54bdc87dd35b450	4635	Pfam	PF00058	Low-density lipoprotein receptor repeat class B	1508	1548	2.1e-11	T	31-10-2019	IPR000033	LDLR class B repeat
Mmel_00007656-RA	be1f8dee5db01852d54bdc87dd35b450	4635	Pfam	PF00058	Low-density lipoprotein receptor repeat class B	2506	2547	2.1e-10	T	31-10-2019	IPR000033	LDLR class B repeat
Mmel_00007656-RA	be1f8dee5db01852d54bdc87dd35b450	4635	Pfam	PF00058	Low-density lipoprotein receptor repeat class B	784	822	4.3e-05	T	31-10-2019	IPR000033	LDLR class B repeat
Mmel_00007656-RA	be1f8dee5db01852d54bdc87dd35b450	4635	Pfam	PF00058	Low-density lipoprotein receptor repeat class B	424	463	1.3e-05	T	31-10-2019	IPR000033	LDLR class B repeat
Mmel_00007656-RA	be1f8dee5db01852d54bdc87dd35b450	4635	Pfam	PF00058	Low-density lipoprotein receptor repeat class B	1555	1594	1.7e-08	T	31-10-2019	IPR000033	LDLR class B repeat
Mmel_00007656-RA	be1f8dee5db01852d54bdc87dd35b450	4635	Pfam	PF14670	Coagulation Factor Xa inhibitory site	1340	1375	1.9e-09	T	31-10-2019
Mmel_00007656-RA	be1f8dee5db01852d54bdc87dd35b450	4635	Pfam	PF14670	Coagulation Factor Xa inhibitory site	2009	2045	2.3e-10	T	31-10-2019
Mmel_00007656-RA	be1f8dee5db01852d54bdc87dd35b450	4635	Pfam	PF00057	Low-density lipoprotein receptor domain class A	1173	1209	1.8e-09	T	31-10-2019	IPR002172	Low-density lipoprotein (LDL) receptor class A repeat	GO:0005515
Mmel_00007656-RA	be1f8dee5db01852d54bdc87dd35b450	4635	Pfam	PF00057	Low-density lipoprotein receptor domain class A	3595	3632	2.3e-08	T	31-10-2019	IPR002172	Low-density lipoprotein (LDL) receptor class A repeat	GO:0005515
Mmel_00007656-RA	be1f8dee5db01852d54bdc87dd35b450	4635	Pfam	PF00057	Low-density lipoprotein receptor domain class A	3885	3922	9.1e-07	T	31-10-2019	IPR002172	Low-density lipoprotein (LDL) receptor class A repeat	GO:0005515
Mmel_00007656-RA	be1f8dee5db01852d54bdc87dd35b450	4635	Pfam	PF00057	Low-density lipoprotein receptor domain class A	3798	3834	6.3e-11	T	31-10-2019	IPR002172	Low-density lipoprotein (LDL) receptor class A repeat	GO:0005515
Mmel_00007656-RA	be1f8dee5db01852d54bdc87dd35b450	4635	Pfam	PF00057	Low-density lipoprotein receptor domain class A	2994	3029	1.5e-09	T	31-10-2019	IPR002172	Low-density lipoprotein (LDL) receptor class A repeat	GO:0005515
Mmel_00007656-RA	be1f8dee5db01852d54bdc87dd35b450	4635	Pfam	PF00057	Low-density lipoprotein receptor domain class A	2822	2861	4.7e-09	T	31-10-2019	IPR002172	Low-density lipoprotein (LDL) receptor class A repeat	GO:0005515
Mmel_00007656-RA	be1f8dee5db01852d54bdc87dd35b450	4635	Pfam	PF00057	Low-density lipoprotein receptor domain class A	1095	1130	2e-11	T	31-10-2019	IPR002172	Low-density lipoprotein (LDL) receptor class A repeat	GO:0005515
Mmel_00007656-RA	be1f8dee5db01852d54bdc87dd35b450	4635	Pfam	PF00057	Low-density lipoprotein receptor domain class A	2781	2819	1.6e-07	T	31-10-2019	IPR002172	Low-density lipoprotein (LDL) receptor class A repeat	GO:0005515
Mmel_00007656-RA	be1f8dee5db01852d54bdc87dd35b450	4635	Pfam	PF00057	Low-density lipoprotein receptor domain class A	58	95	4.2e-11	T	31-10-2019	IPR002172	Low-density lipoprotein (LDL) receptor class A repeat	GO:0005515
Mmel_00007656-RA	be1f8dee5db01852d54bdc87dd35b450	4635	Pfam	PF00057	Low-density lipoprotein receptor domain class A	3679	3716	1.5e-07	T	31-10-2019	IPR002172	Low-density lipoprotein (LDL) receptor class A repeat	GO:0005515
Mmel_00007656-RA	be1f8dee5db01852d54bdc87dd35b450	4635	Pfam	PF00057	Low-density lipoprotein receptor domain class A	2949	2990	1.3e-09	T	31-10-2019	IPR002172	Low-density lipoprotein (LDL) receptor class A repeat	GO:0005515
Mmel_00007656-RA	be1f8dee5db01852d54bdc87dd35b450	4635	Pfam	PF00057	Low-density lipoprotein receptor domain class A	3555	3586	8.6e-08	T	31-10-2019	IPR002172	Low-density lipoprotein (LDL) receptor class A repeat	GO:0005515
Mmel_00007656-RA	be1f8dee5db01852d54bdc87dd35b450	4635	Pfam	PF00057	Low-density lipoprotein receptor domain class A	1256	1292	4.4e-11	T	31-10-2019	IPR002172	Low-density lipoprotein (LDL) receptor class A repeat	GO:0005515
Mmel_00007656-RA	be1f8dee5db01852d54bdc87dd35b450	4635	Pfam	PF00057	Low-density lipoprotein receptor domain class A	3076	3111	6.9e-10	T	31-10-2019	IPR002172	Low-density lipoprotein (LDL) receptor class A repeat	GO:0005515
Mmel_00007656-RA	be1f8dee5db01852d54bdc87dd35b450	4635	Pfam	PF00057	Low-density lipoprotein receptor domain class A	1052	1088	3.4e-12	T	31-10-2019	IPR002172	Low-density lipoprotein (LDL) receptor class A repeat	GO:0005515
Mmel_00007656-RA	be1f8dee5db01852d54bdc87dd35b450	4635	Pfam	PF00057	Low-density lipoprotein receptor domain class A	3760	3795	7.4e-08	T	31-10-2019	IPR002172	Low-density lipoprotein (LDL) receptor class A repeat	GO:0005515
Mmel_00007656-RA	be1f8dee5db01852d54bdc87dd35b450	4635	Pfam	PF00057	Low-density lipoprotein receptor domain class A	2906	2945	9e-11	T	31-10-2019	IPR002172	Low-density lipoprotein (LDL) receptor class A repeat	GO:0005515
Mmel_00007656-RA	be1f8dee5db01852d54bdc87dd35b450	4635	Pfam	PF00057	Low-density lipoprotein receptor domain class A	2686	2719	8e-10	T	31-10-2019	IPR002172	Low-density lipoprotein (LDL) receptor class A repeat	GO:0005515
Mmel_00007656-RA	be1f8dee5db01852d54bdc87dd35b450	4635	Pfam	PF00057	Low-density lipoprotein receptor domain class A	3720	3756	2.4e-10	T	31-10-2019	IPR002172	Low-density lipoprotein (LDL) receptor class A repeat	GO:0005515
Mmel_00007656-RA	be1f8dee5db01852d54bdc87dd35b450	4635	Pfam	PF00057	Low-density lipoprotein receptor domain class A	2742	2777	7.3e-12	T	31-10-2019	IPR002172	Low-density lipoprotein (LDL) receptor class A repeat	GO:0005515
Mmel_00007656-RA	be1f8dee5db01852d54bdc87dd35b450	4635	Pfam	PF00057	Low-density lipoprotein receptor domain class A	1217	1253	7.9e-10	T	31-10-2019	IPR002172	Low-density lipoprotein (LDL) receptor class A repeat	GO:0005515
Mmel_00007656-RA	be1f8dee5db01852d54bdc87dd35b450	4635	Pfam	PF00057	Low-density lipoprotein receptor domain class A	1012	1047	3.6e-11	T	31-10-2019	IPR002172	Low-density lipoprotein (LDL) receptor class A repeat	GO:0005515
Mmel_00007656-RA	be1f8dee5db01852d54bdc87dd35b450	4635	Pfam	PF00057	Low-density lipoprotein receptor domain class A	3844	3876	3.6e-09	T	31-10-2019	IPR002172	Low-density lipoprotein (LDL) receptor class A repeat	GO:0005515
Mmel_00007656-RA	be1f8dee5db01852d54bdc87dd35b450	4635	Pfam	PF00057	Low-density lipoprotein receptor domain class A	3929	3964	8.1e-09	T	31-10-2019	IPR002172	Low-density lipoprotein (LDL) receptor class A repeat	GO:0005515
Mmel_00007656-RA	be1f8dee5db01852d54bdc87dd35b450	4635	Pfam	PF00057	Low-density lipoprotein receptor domain class A	2865	2901	7.4e-12	T	31-10-2019	IPR002172	Low-density lipoprotein (LDL) receptor class A repeat	GO:0005515
Mmel_00007656-RA	be1f8dee5db01852d54bdc87dd35b450	4635	Pfam	PF00057	Low-density lipoprotein receptor domain class A	3514	3550	7.7e-11	T	31-10-2019	IPR002172	Low-density lipoprotein (LDL) receptor class A repeat	GO:0005515
Mmel_00007656-RA	be1f8dee5db01852d54bdc87dd35b450	4635	Pfam	PF00057	Low-density lipoprotein receptor domain class A	20	54	1.7e-10	T	31-10-2019	IPR002172	Low-density lipoprotein (LDL) receptor class A repeat	GO:0005515
Mmel_00007656-RA	be1f8dee5db01852d54bdc87dd35b450	4635	Pfam	PF00057	Low-density lipoprotein receptor domain class A	1135	1170	2.9e-09	T	31-10-2019	IPR002172	Low-density lipoprotein (LDL) receptor class A repeat	GO:0005515
Mmel_00007656-RA	be1f8dee5db01852d54bdc87dd35b450	4635	Pfam	PF00057	Low-density lipoprotein receptor domain class A	3635	3673	6.1e-11	T	31-10-2019	IPR002172	Low-density lipoprotein (LDL) receptor class A repeat	GO:0005515
Mmel_00007656-RA	be1f8dee5db01852d54bdc87dd35b450	4635	Pfam	PF00057	Low-density lipoprotein receptor domain class A	3033	3067	3.6e-10	T	31-10-2019	IPR002172	Low-density lipoprotein (LDL) receptor class A repeat	GO:0005515
Mmel_00007656-RA	be1f8dee5db01852d54bdc87dd35b450	4635	Pfam	PF00057	Low-density lipoprotein receptor domain class A	98	134	4.6e-09	T	31-10-2019	IPR002172	Low-density lipoprotein (LDL) receptor class A repeat	GO:0005515
Mmel_00007656-RA	be1f8dee5db01852d54bdc87dd35b450	4635	Pfam	PF12662	Complement Clr-like EGF-like	3134	3157	1.1e-09	T	31-10-2019	IPR026823	Complement Clr-like EGF domain
Mmel_00001113-RA	0302eb17fce3fe06cb6c6ba23f5ef789	1116	Pfam	PF00169	PH domain	523	634	4.7e-15	T	31-10-2019	IPR001849	Pleckstrin homology domain
Mmel_00001113-RA	0302eb17fce3fe06cb6c6ba23f5ef789	1116	Pfam	PF00595	PDZ domain (Also known as DHR or GLGF)	947	1004	5.6e-09	T	31-10-2019	IPR001478	PDZ domain	GO:0005515
Mmel_00009580-RA	f14f6e67c9fc4378798dd828ec971387	234	Pfam	PF00090	Thrombospondin type 1 domain	154	204	1.3e-10	T	31-10-2019	IPR000884	Thrombospondin type-1 (TSP1) repeat
Mmel_00009580-RA	f14f6e67c9fc4378798dd828ec971387	234	Pfam	PF00090	Thrombospondin type 1 domain	97	147	1.1e-12	T	31-10-2019	IPR000884	Thrombospondin type-1 (TSP1) repeat
Mmel_00001247-RA	baa84098fbd6211db5e5ad5926dbf413	501	Pfam	PF13913	zinc-finger of a C2HC-type	355	375	9.2e-07	T	31-10-2019
Mmel_00001247-RA	baa84098fbd6211db5e5ad5926dbf413	501	Pfam	PF13913	zinc-finger of a C2HC-type	465	487	2e-07	T	31-10-2019
Mmel_00007596-RA	589f9a4d1956543ee42d593d2eb9a02c	1123	Pfam	PF15688	Nuclear receptor-interacting protein 1 repression 2	409	738	2.6e-126	T	31-10-2019	IPR031406	Nuclear receptor-interacting protein 1, repression domain 2		Reactome: R-HSA-1368082|Reactome: R-HSA-1368108|Reactome: R-HSA-400253
Mmel_00007596-RA	589f9a4d1956543ee42d593d2eb9a02c	1123	Pfam	PF15690	Nuclear receptor-interacting protein 1 repression 4	850	1122	2.9e-144	T	31-10-2019	IPR031408	Nuclear receptor-interacting protein 1, repression domain 4		Reactome: R-HSA-1368082|Reactome: R-HSA-1368108|Reactome: R-HSA-400253
Mmel_00007596-RA	589f9a4d1956543ee42d593d2eb9a02c	1123	Pfam	PF15687	Nuclear receptor-interacting protein 1 repression 1	27	328	5.1e-141	T	31-10-2019	IPR031405	Nuclear receptor-interacting protein 1, repression domain 1		Reactome: R-HSA-1368082|Reactome: R-HSA-1368108|Reactome: R-HSA-400253
Mmel_00007596-RA	589f9a4d1956543ee42d593d2eb9a02c	1123	Pfam	PF15689	Nuclear receptor-interacting protein 1 repression 3	754	842	3.2e-43	T	31-10-2019	IPR031407	Nuclear receptor-interacting protein 1, repression domain 3		Reactome: R-HSA-1368082|Reactome: R-HSA-1368108|Reactome: R-HSA-400253
Mmel_00014502-RA	68dd89b189514347ccac22f7171571a7	276	Pfam	PF01852	START domain	78	234	2.2e-29	T	31-10-2019	IPR002913	START domain	GO:0008289
Mmel_00014496-RA	5d0631d67545bdcc82fdfa0a44ddef52	389	Pfam	PF01753	MYND finger	343	366	1.3e-05	T	31-10-2019	IPR002893	Zinc finger, MYND-type
Mmel_00004341-RA	65c7055af9a425f04cf43a9c5f19aa49	411	Pfam	PF12796	Ankyrin repeats (3 copies)	4	85	1.1e-10	T	31-10-2019	IPR020683	Ankyrin repeat-containing domain
Mmel_00004341-RA	65c7055af9a425f04cf43a9c5f19aa49	411	Pfam	PF01753	MYND finger	274	311	1.5e-09	T	31-10-2019	IPR002893	Zinc finger, MYND-type
Mmel_00006241-RA	25498c1d302a3f507048e274941e039d	413	Pfam	PF12796	Ankyrin repeats (3 copies)	6	101	5.3e-15	T	31-10-2019	IPR020683	Ankyrin repeat-containing domain
Mmel_00006512-RA	8fc9cf558182c87cfafd614146f4da94	224	Pfam	PF03708	Avian retrovirus envelope protein, gp85	66	110	2.5e-11	T	31-10-2019	IPR005166	Rous sarcoma virus, Gp95, envelope protein	GO:0019031
Mmel_00010326-RA	9ddf5f74e1117377b7663e73898b3dc9	330	Pfam	PF06468	Spondin_N	42	236	1.5e-75	T	31-10-2019	IPR009465	Spondin, N-terminal		Reactome: R-HSA-5083635|Reactome: R-HSA-5173214
Mmel_00014734-RA	5c446852b01782db12de5d74dfa0277b	286	Pfam	PF07679	Immunoglobulin I-set domain	33	122	2.9e-21	T	31-10-2019	IPR013098	Immunoglobulin I-set
Mmel_00014734-RA	5c446852b01782db12de5d74dfa0277b	286	Pfam	PF07679	Immunoglobulin I-set domain	159	248	1.3e-16	T	31-10-2019	IPR013098	Immunoglobulin I-set
Mmel_00009948-RA	43d83529bd413c36968879b5c8008015	455	Pfam	PF13499	EF-hand domain pair	81	138	3.5e-10	T	31-10-2019	IPR002048	EF-hand domain	GO:0005509
Mmel_00009948-RA	43d83529bd413c36968879b5c8008015	455	Pfam	PF13833	EF-hand domain pair	55	78	0.0032	T	31-10-2019	IPR002048	EF-hand domain	GO:0005509
Mmel_00009948-RA	43d83529bd413c36968879b5c8008015	455	Pfam	PF00153	Mitochondrial carrier protein	279	365	8.7e-24	T	31-10-2019	IPR018108	Mitochondrial substrate/solute carrier
Mmel_00009948-RA	43d83529bd413c36968879b5c8008015	455	Pfam	PF00153	Mitochondrial carrier protein	186	273	5.9e-25	T	31-10-2019	IPR018108	Mitochondrial substrate/solute carrier
Mmel_00009948-RA	43d83529bd413c36968879b5c8008015	455	Pfam	PF00153	Mitochondrial carrier protein	401	450	7.1e-10	T	31-10-2019	IPR018108	Mitochondrial substrate/solute carrier
Mmel_00003827-RA	72a9ec11f64618ef2490ccff195859ff	1113	Pfam	PF00632	HECT-domain (ubiquitin-transferase)	810	1112	1.6e-100	T	31-10-2019	IPR000569	HECT domain	GO:0004842	MetaCyc: PWY-7511|Reactome: R-HSA-983168
Mmel_00003827-RA	72a9ec11f64618ef2490ccff195859ff	1113	Pfam	PF00397	WW domain	564	593	7.5e-12	T	31-10-2019	IPR001202	WW domain	GO:0005515
Mmel_00003827-RA	72a9ec11f64618ef2490ccff195859ff	1113	Pfam	PF00397	WW domain	407	436	6.5e-10	T	31-10-2019	IPR001202	WW domain	GO:0005515
Mmel_00003827-RA	72a9ec11f64618ef2490ccff195859ff	1113	Pfam	PF00397	WW domain	639	668	1.5e-11	T	31-10-2019	IPR001202	WW domain	GO:0005515
Mmel_00003827-RA	72a9ec11f64618ef2490ccff195859ff	1113	Pfam	PF00397	WW domain	690	719	5.2e-13	T	31-10-2019	IPR001202	WW domain	GO:0005515
Mmel_00003827-RA	72a9ec11f64618ef2490ccff195859ff	1113	Pfam	PF00168	C2 domain	89	147	0.00023	T	31-10-2019	IPR000008	C2 domain
Mmel_00008424-RA	c13d1e8457b1e0e3c4ef33936f72d90c	528	Pfam	PF00514	Armadillo/beta-catenin-like repeat	120	160	1.1e-07	T	31-10-2019	IPR000225	Armadillo	GO:0005515
Mmel_00008424-RA	c13d1e8457b1e0e3c4ef33936f72d90c	528	Pfam	PF00514	Armadillo/beta-catenin-like repeat	241	278	8.5e-08	T	31-10-2019	IPR000225	Armadillo	GO:0005515
Mmel_00008424-RA	c13d1e8457b1e0e3c4ef33936f72d90c	528	Pfam	PF00514	Armadillo/beta-catenin-like repeat	282	320	0.00013	T	31-10-2019	IPR000225	Armadillo	GO:0005515
Mmel_00008424-RA	c13d1e8457b1e0e3c4ef33936f72d90c	528	Pfam	PF00514	Armadillo/beta-catenin-like repeat	410	446	5.2e-07	T	31-10-2019	IPR000225	Armadillo	GO:0005515
Mmel_00008424-RA	c13d1e8457b1e0e3c4ef33936f72d90c	528	Pfam	PF00514	Armadillo/beta-catenin-like repeat	194	237	6.7e-10	T	31-10-2019	IPR000225	Armadillo	GO:0005515
Mmel_00008424-RA	c13d1e8457b1e0e3c4ef33936f72d90c	528	Pfam	PF00514	Armadillo/beta-catenin-like repeat	323	363	1.2e-10	T	31-10-2019	IPR000225	Armadillo	GO:0005515
Mmel_00008424-RA	c13d1e8457b1e0e3c4ef33936f72d90c	528	Pfam	PF00514	Armadillo/beta-catenin-like repeat	366	404	1.7e-07	T	31-10-2019	IPR000225	Armadillo	GO:0005515
Mmel_00008424-RA	c13d1e8457b1e0e3c4ef33936f72d90c	528	Pfam	PF01749	Importin beta binding domain	24	109	2.6e-30	T	31-10-2019	IPR002652	Importin-alpha, importin-beta-binding domain	GO:0006606|GO:0061608
Mmel_00008424-RA	c13d1e8457b1e0e3c4ef33936f72d90c	528	Pfam	PF16186	Atypical Arm repeat	457	507	1.4e-24	T	31-10-2019	IPR032413	Atypical Arm repeat		Reactome: R-HSA-1169408|Reactome: R-HSA-168276
Mmel_00002059-RA	eac2ccac5aafb03aaf252bc6e15055b0	219	Pfam	PF15910	ICOS V-set domain	44	156	2.2e-32	T	31-10-2019	IPR013106	Immunoglobulin V-set domain
Mmel_00012575-RA	0e2715ae76ffe7dcfb3a1bf933eb7791	115	Pfam	PF15060	Differentiation and proliferation regulator	7	101	2.8e-27	T	31-10-2019	IPR026754	Pancreatic progenitor cell differentiation and proliferation factor	GO:0007275|GO:0030154
Mmel_00008340-RA	2cc98cd0b9540ad88d071d75c884fb78	1095	Pfam	PF07647	SAM domain (Sterile alpha motif)	19	78	2.3e-06	T	31-10-2019	IPR001660	Sterile alpha motif domain	GO:0005515
Mmel_00008340-RA	2cc98cd0b9540ad88d071d75c884fb78	1095	Pfam	PF00620	RhoGAP domain	658	802	4.6e-41	T	31-10-2019	IPR000198	Rho GTPase-activating protein domain	GO:0007165	Reactome: R-HSA-194840
Mmel_00008340-RA	2cc98cd0b9540ad88d071d75c884fb78	1095	Pfam	PF01852	START domain	893	1088	1.3e-48	T	31-10-2019	IPR002913	START domain	GO:0008289
Mmel_00012949-RA	8ce856a7e5760b820b529d78a44a78a8	745	Pfam	PF16746	BAR domain of APPL family	28	226	4.6e-57	T	31-10-2019
Mmel_00012949-RA	8ce856a7e5760b820b529d78a44a78a8	745	Pfam	PF00620	RhoGAP domain	366	515	2.5e-40	T	31-10-2019	IPR000198	Rho GTPase-activating protein domain	GO:0007165	Reactome: R-HSA-194840
Mmel_00012949-RA	8ce856a7e5760b820b529d78a44a78a8	745	Pfam	PF00169	PH domain	244	340	1.6e-07	T	31-10-2019	IPR001849	Pleckstrin homology domain
Mmel_00013724-RA	ef136f0c9dcf78ab99ee4d98d4e630fc	2398	Pfam	PF16511	N-terminal or F0 domain of Talin-head FERM	4	83	9e-32	T	31-10-2019	IPR032425	Talin, N-terminal F0 domain
Mmel_00013724-RA	ef136f0c9dcf78ab99ee4d98d4e630fc	2398	Pfam	PF00373	FERM central domain	218	325	3.4e-27	T	31-10-2019	IPR019748	FERM central domain
Mmel_00013724-RA	ef136f0c9dcf78ab99ee4d98d4e630fc	2398	Pfam	PF09141	Talin, middle domain	503	664	2.8e-56	T	31-10-2019	IPR015224	Talin, central	GO:0001726|GO:0005200|GO:0005925|GO:0007016
Mmel_00013724-RA	ef136f0c9dcf78ab99ee4d98d4e630fc	2398	Pfam	PF01608	I/LWEQ domain	2242	2386	1.9e-49	T	31-10-2019	IPR002558	I/LWEQ domain	GO:0003779
Mmel_00013724-RA	ef136f0c9dcf78ab99ee4d98d4e630fc	2398	Pfam	PF09379	FERM N-terminal domain	90	197	3.4e-19	T	31-10-2019	IPR018979	FERM, N-terminal
Mmel_00013724-RA	ef136f0c9dcf78ab99ee4d98d4e630fc	2398	Pfam	PF08913	Vinculin Binding Site	1101	1217	2.2e-05	T	31-10-2019	IPR015009	Vinculin-binding site-containing domain
Mmel_00013724-RA	ef136f0c9dcf78ab99ee4d98d4e630fc	2398	Pfam	PF08913	Vinculin Binding Site	1716	1828	1.4e-50	T	31-10-2019	IPR015009	Vinculin-binding site-containing domain
Mmel_00012259-RA	03937f5f2540060046fc7292fbacb471	319	Pfam	PF14580	Leucine-rich repeat	141	231	1.9e-09	T	31-10-2019
Mmel_00012259-RA	03937f5f2540060046fc7292fbacb471	319	Pfam	PF12799	Leucine Rich repeats (2 copies)	248	289	2e-09	T	31-10-2019	IPR025875	Leucine rich repeat 4
Mmel_00014075-RA	7a9c7346638f2ef9b2b7626ed175e685	448	Pfam	PF00520	Ion transport protein	71	304	2.6e-15	T	31-10-2019	IPR005821	Ion transport domain	GO:0005216|GO:0006811|GO:0016020|GO:0055085
Mmel_00000092-RA	e81c78fad8bbc9786ecc1b32dd168a3d	1538	Pfam	PF01421	Reprolysin (M12B) family zinc metalloprotease	78	287	2.9e-25	T	31-10-2019	IPR001590	Peptidase M12B, ADAM/reprolysin	GO:0004222|GO:0006508
Mmel_00000092-RA	e81c78fad8bbc9786ecc1b32dd168a3d	1538	Pfam	PF05986	ADAM-TS Spacer 1	541	643	1.4e-27	T	31-10-2019	IPR010294	ADAM-TS Spacer 1		Reactome: R-HSA-5083635|Reactome: R-HSA-5173214
Mmel_00000092-RA	e81c78fad8bbc9786ecc1b32dd168a3d	1538	Pfam	PF00090	Thrombospondin type 1 domain	834	884	0.00096	T	31-10-2019	IPR000884	Thrombospondin type-1 (TSP1) repeat
Mmel_00000092-RA	e81c78fad8bbc9786ecc1b32dd168a3d	1538	Pfam	PF00090	Thrombospondin type 1 domain	1220	1271	0.00038	T	31-10-2019	IPR000884	Thrombospondin type-1 (TSP1) repeat
Mmel_00000092-RA	e81c78fad8bbc9786ecc1b32dd168a3d	1538	Pfam	PF00090	Thrombospondin type 1 domain	890	939	1.2e-06	T	31-10-2019	IPR000884	Thrombospondin type-1 (TSP1) repeat
Mmel_00000092-RA	e81c78fad8bbc9786ecc1b32dd168a3d	1538	Pfam	PF00090	Thrombospondin type 1 domain	1166	1215	0.0039	T	31-10-2019	IPR000884	Thrombospondin type-1 (TSP1) repeat
Mmel_00000092-RA	e81c78fad8bbc9786ecc1b32dd168a3d	1538	Pfam	PF00090	Thrombospondin type 1 domain	1071	1120	6.9e-06	T	31-10-2019	IPR000884	Thrombospondin type-1 (TSP1) repeat
Mmel_00000092-RA	e81c78fad8bbc9786ecc1b32dd168a3d	1538	Pfam	PF00090	Thrombospondin type 1 domain	1016	1039	8.6e-05	T	31-10-2019	IPR000884	Thrombospondin type-1 (TSP1) repeat
Mmel_00000092-RA	e81c78fad8bbc9786ecc1b32dd168a3d	1538	Pfam	PF00090	Thrombospondin type 1 domain	943	991	0.078	T	31-10-2019	IPR000884	Thrombospondin type-1 (TSP1) repeat
Mmel_00000092-RA	e81c78fad8bbc9786ecc1b32dd168a3d	1538	Pfam	PF00090	Thrombospondin type 1 domain	380	430	1.1e-07	T	31-10-2019	IPR000884	Thrombospondin type-1 (TSP1) repeat
Mmel_00010263-RA	4e1e99b9e38a8a41ec500373abe93697	244	Pfam	PF00017	SH2 domain	79	160	2.9e-13	T	31-10-2019	IPR000980	SH2 domain
Mmel_00010263-RA	4e1e99b9e38a8a41ec500373abe93697	244	Pfam	PF07525	SOCS box	208	240	7.9e-12	T	31-10-2019	IPR001496	SOCS box domain		Reactome: R-HSA-8951664
Mmel_00010973-RA	124369f957b3a42f6e626f30c2a37b3d	105	Pfam	PF01158	Ribosomal protein L36e	4	99	9.2e-52	T	31-10-2019	IPR000509	Ribosomal protein L36e	GO:0003735|GO:0005622|GO:0005840|GO:0006412	Reactome: R-HSA-156827|Reactome: R-HSA-156902|Reactome: R-HSA-1799339|Reactome: R-HSA-192823|Reactome: R-HSA-2408557|Reactome: R-HSA-6791226|Reactome: R-HSA-72689|Reactome: R-HSA-72706|Reactome: R-HSA-72764|Reactome: R-HSA-9010553|Reactome: R-HSA-975956|Reactome: R-HSA-975957
Mmel_00012619-RA	4584536a8479708a50f9180f5b8fd7c6	529	Pfam	PF00778	DIX domain	30	54	3.9e-06	T	31-10-2019	IPR001158	DIX domain
Mmel_00012619-RA	4584536a8479708a50f9180f5b8fd7c6	529	Pfam	PF12316	Segment polarity protein dishevelled (Dsh) C terminal	457	527	1.2e-31	T	31-10-2019	IPR024580	Dishevelled C-terminal
Mmel_00012619-RA	4584536a8479708a50f9180f5b8fd7c6	529	Pfam	PF02377	Dishevelled specific domain	95	202	1.7e-39	T	31-10-2019	IPR003351	Dishevelled protein domain
Mmel_00012619-RA	4584536a8479708a50f9180f5b8fd7c6	529	Pfam	PF02377	Dishevelled specific domain	63	96	2e-09	T	31-10-2019	IPR003351	Dishevelled protein domain
Mmel_00012619-RA	4584536a8479708a50f9180f5b8fd7c6	529	Pfam	PF00610	Domain found in Dishevelled, Egl-10, and Pleckstrin (DEP)	382	451	2.8e-16	T	31-10-2019	IPR000591	DEP domain	GO:0035556
Mmel_00012619-RA	4584536a8479708a50f9180f5b8fd7c6	529	Pfam	PF00595	PDZ domain (Also known as DHR or GLGF)	207	290	1.4e-19	T	31-10-2019	IPR001478	PDZ domain	GO:0005515
Mmel_00005697-RA	18983ca501fb21c029fe6ffdcf106b39	975	Pfam	PF16178	Dimerisation domain of Ca+-activated chloride-channel, anoctamin	77	338	1e-84	T	31-10-2019	IPR032394	Anoctamin, dimerisation domain	GO:0046983	Reactome: R-HSA-2672351
Mmel_00005697-RA	18983ca501fb21c029fe6ffdcf106b39	975	Pfam	PF04547	Calcium-activated chloride channel	341	917	2e-159	T	31-10-2019	IPR007632	Anoctamin		Reactome: R-HSA-2672351
Mmel_00011466-RA	c83fc84411c8165ab5e22ba1eaec40f8	894	Pfam	PF14555	UBA-like domain	87	120	6.2e-05	T	31-10-2019
Mmel_00011466-RA	c83fc84411c8165ab5e22ba1eaec40f8	894	Pfam	PF12478	Ubiquitin-associated protein 2	540	572	6e-16	T	31-10-2019	IPR022166	Protein of unknown function DUF3697, ubiquitin-associated protein 2
Mmel_00013365-RA	1e93e70333286375a13a109725c178c4	139	Pfam	PF07654	Immunoglobulin C1-set domain	3	67	3.2e-12	T	31-10-2019	IPR003597	Immunoglobulin C1-set
Mmel_00008230-RA	0435410349a2bd737983d900e96375a4	73	Pfam	PF00069	Protein kinase domain	4	58	5.1e-08	T	31-10-2019	IPR000719	Protein kinase domain	GO:0004672|GO:0005524|GO:0006468
Mmel_00010152-RA	a8e79c451e26e73ffeecac08f81466db	1899	Pfam	PF00388	Phosphatidylinositol-specific phospholipase C, X domain	430	574	7.6e-65	T	31-10-2019	IPR000909	Phosphatidylinositol-specific phospholipase C, X domain
Mmel_00010152-RA	a8e79c451e26e73ffeecac08f81466db	1899	Pfam	PF13499	EF-hand domain pair	181	243	5.4e-12	T	31-10-2019	IPR002048	EF-hand domain	GO:0005509
Mmel_00010152-RA	a8e79c451e26e73ffeecac08f81466db	1899	Pfam	PF16457	Pleckstrin homology domain	5	115	7.1e-09	T	31-10-2019	IPR001849	Pleckstrin homology domain
Mmel_00010152-RA	a8e79c451e26e73ffeecac08f81466db	1899	Pfam	PF00168	C2 domain	872	974	2e-15	T	31-10-2019	IPR000008	C2 domain
Mmel_00010152-RA	a8e79c451e26e73ffeecac08f81466db	1899	Pfam	PF00387	Phosphatidylinositol-specific phospholipase C, Y domain	739	851	3.2e-40	T	31-10-2019	IPR001711	Phospholipase C, phosphatidylinositol-specific, Y domain	GO:0004435|GO:0006629|GO:0007165|GO:0035556	KEGG: 00562+3.1.4.11|KEGG: 04070+3.1.4.11|MetaCyc: PWY-6351|MetaCyc: PWY-6367|MetaCyc: PWY-7039|Reactome: R-HSA-1855204
Mmel_00014377-RA	c6163e5e5c537149456818af99e14b49	131	Pfam	PF07679	Immunoglobulin I-set domain	2	76	4e-16	T	31-10-2019	IPR013098	Immunoglobulin I-set
Mmel_00005660-RA	03dd6544f016058fb6f502f61846fefd	1208	Pfam	PF00412	LIM domain	952	1008	4.3e-08	T	31-10-2019	IPR001781	Zinc finger, LIM-type
Mmel_00005660-RA	03dd6544f016058fb6f502f61846fefd	1208	Pfam	PF01494	FAD binding domain	82	116	1e-05	T	31-10-2019	IPR002938	FAD-binding domain	GO:0071949
Mmel_00005660-RA	03dd6544f016058fb6f502f61846fefd	1208	Pfam	PF00307	Calponin homology (CH) domain	512	614	4.3e-21	T	31-10-2019	IPR001715	Calponin homology domain	GO:0005515
Mmel_00008156-RA	e4033d5b4d6880b3ed58193f4c221328	436	Pfam	PF16493	N-terminal of Homeobox Meis and PKNOX1	80	162	1.7e-36	T	31-10-2019	IPR032453	Homeobox protein PKNOX/Meis, N-terminal
Mmel_00008156-RA	e4033d5b4d6880b3ed58193f4c221328	436	Pfam	PF05920	Homeobox KN domain	277	316	1.1e-19	T	31-10-2019	IPR008422	Homeobox KN domain	GO:0003677|GO:0006355
Mmel_00011467-RA	a3246f10bb140c0182a8090b0542efef	678	Pfam	PF01390	SEA domain	81	169	3.7e-13	T	31-10-2019	IPR000082	SEA domain
Mmel_00011467-RA	a3246f10bb140c0182a8090b0542efef	678	Pfam	PF00057	Low-density lipoprotein receptor domain class A	463	495	6.8e-10	T	31-10-2019	IPR002172	Low-density lipoprotein (LDL) receptor class A repeat	GO:0005515
Mmel_00011467-RA	a3246f10bb140c0182a8090b0542efef	678	Pfam	PF00431	CUB domain	206	311	3.3e-14	T	31-10-2019	IPR000859	CUB domain
Mmel_00011467-RA	a3246f10bb140c0182a8090b0542efef	678	Pfam	PF00431	CUB domain	320	385	4.1e-12	T	31-10-2019	IPR000859	CUB domain
Mmel_00011467-RA	a3246f10bb140c0182a8090b0542efef	678	Pfam	PF00089	Trypsin	499	672	6.6e-41	T	31-10-2019	IPR001254	Serine proteases, trypsin domain	GO:0004252|GO:0006508
Mmel_00013417-RA	8d8e6048e5aafaa83fb0e438a3201b1d	616	Pfam	PF00651	BTB/POZ domain	21	127	5.2e-29	T	31-10-2019	IPR000210	BTB/POZ domain	GO:0005515
Mmel_00013417-RA	8d8e6048e5aafaa83fb0e438a3201b1d	616	Pfam	PF00096	Zinc finger, C2H2 type	455	479	0.016	T	31-10-2019
Mmel_00013417-RA	8d8e6048e5aafaa83fb0e438a3201b1d	616	Pfam	PF00096	Zinc finger, C2H2 type	427	449	0.00024	T	31-10-2019
Mmel_00013417-RA	8d8e6048e5aafaa83fb0e438a3201b1d	616	Pfam	PF00096	Zinc finger, C2H2 type	487	511	0.00023	T	31-10-2019
Mmel_00013417-RA	8d8e6048e5aafaa83fb0e438a3201b1d	616	Pfam	PF00096	Zinc finger, C2H2 type	399	421	0.00013	T	31-10-2019
Mmel_00008121-RA	a4260daa58b90bc3fa394908c4fce183	159	Pfam	PF12796	Ankyrin repeats (3 copies)	50	136	5.2e-07	T	31-10-2019	IPR020683	Ankyrin repeat-containing domain
Mmel_00010903-RA	7b31f36ad995af6ccbf732ab2d84ae5a	561	Pfam	PF01759	UNC-6/NTR/C345C module	442	544	3.4e-10	T	31-10-2019	IPR018933	Netrin module, non-TIMP type
Mmel_00010903-RA	7b31f36ad995af6ccbf732ab2d84ae5a	561	Pfam	PF00095	WAP-type (Whey Acidic Protein) 'four-disulfide core'	31	78	5.9e-07	T	31-10-2019	IPR008197	WAP-type 'four-disulfide core' domain	GO:0005576|GO:0030414
Mmel_00010903-RA	7b31f36ad995af6ccbf732ab2d84ae5a	561	Pfam	PF00014	Kunitz/Bovine pancreatic trypsin inhibitor domain	314	365	2.5e-12	T	31-10-2019	IPR002223	Pancreatic trypsin inhibitor Kunitz domain	GO:0004867
Mmel_00010903-RA	7b31f36ad995af6ccbf732ab2d84ae5a	561	Pfam	PF00014	Kunitz/Bovine pancreatic trypsin inhibitor domain	371	422	1.5e-20	T	31-10-2019	IPR002223	Pancreatic trypsin inhibitor Kunitz domain	GO:0004867
Mmel_00010903-RA	7b31f36ad995af6ccbf732ab2d84ae5a	561	Pfam	PF07679	Immunoglobulin I-set domain	200	292	2.8e-16	T	31-10-2019	IPR013098	Immunoglobulin I-set
Mmel_00009332-RA	84523d3f4626ba037c4663ae061f1987	2284	Pfam	PF09141	Talin, middle domain	222	383	4.5e-55	T	31-10-2019	IPR015224	Talin, central	GO:0001726|GO:0005200|GO:0005925|GO:0007016
Mmel_00009332-RA	84523d3f4626ba037c4663ae061f1987	2284	Pfam	PF01608	I/LWEQ domain	391	491	4.7e-07	T	31-10-2019	IPR002558	I/LWEQ domain	GO:0003779
Mmel_00009332-RA	84523d3f4626ba037c4663ae061f1987	2284	Pfam	PF01608	I/LWEQ domain	2128	2273	8.2e-49	T	31-10-2019	IPR002558	I/LWEQ domain	GO:0003779
Mmel_00009332-RA	84523d3f4626ba037c4663ae061f1987	2284	Pfam	PF08913	Vinculin Binding Site	1592	1716	2.1e-64	T	31-10-2019	IPR015009	Vinculin-binding site-containing domain
Mmel_00010806-RA	1b3d9df8ee4e69f0b88bb725deac99f0	749	Pfam	PF09730	Microtubule-associated protein Bicaudal-D	5	708	0	T	31-10-2019	IPR018477	Bicaudal-D protein	GO:0008093|GO:0070840	Reactome: R-HSA-6811436
Mmel_00010752-RA	e9cc7c8e3a0179d45b1fe631d0973f26	408	Pfam	PF00307	Calponin homology (CH) domain	288	383	8.8e-12	T	31-10-2019	IPR001715	Calponin homology domain	GO:0005515
Mmel_00010752-RA	e9cc7c8e3a0179d45b1fe631d0973f26	408	Pfam	PF00307	Calponin homology (CH) domain	125	226	1.4e-13	T	31-10-2019	IPR001715	Calponin homology domain	GO:0005515
Mmel_00007254-RA	9ffecda75b4ef32e88aeb2bfa5234c94	224	Pfam	PF14921	Adenomatosis polyposis coli down-regulated 1	2	179	4.1e-29	T	31-10-2019	IPR029405	APCDD1 domain
Mmel_00013386-RA	3d7d9dda402459a45432ff56d9eee524	96	Pfam	PF02422	Keratin	14	76	1.6e-29	T	31-10-2019	IPR003461	Keratin	GO:0005200|GO:0005882
Mmel_00012507-RA	2cc9aea5f9c929285e105d1c941f90a3	174	Pfam	PF00084	Sushi repeat (SCR repeat)	56	94	7.7e-11	T	31-10-2019	IPR000436	Sushi/SCR/CCP domain
Mmel_00012507-RA	2cc9aea5f9c929285e105d1c941f90a3	174	Pfam	PF00084	Sushi repeat (SCR repeat)	111	171	1.1e-10	T	31-10-2019	IPR000436	Sushi/SCR/CCP domain
Mmel_00013940-RA	cf9a2982412242d4edbf078284aefd65	439	Pfam	PF00096	Zinc finger, C2H2 type	241	263	0.00053	T	31-10-2019
Mmel_00013940-RA	cf9a2982412242d4edbf078284aefd65	439	Pfam	PF00096	Zinc finger, C2H2 type	270	291	0.00063	T	31-10-2019
Mmel_00013940-RA	cf9a2982412242d4edbf078284aefd65	439	Pfam	PF00096	Zinc finger, C2H2 type	299	322	0.0074	T	31-10-2019
Mmel_00006707-RA	2c3ef44b77e10fd697c43cbef35899b6	143	Pfam	PF15807	Membrane-associated protein 117 kDa, PDZK1-interacting protein 1	51	143	2e-29	T	31-10-2019	IPR031627	PDZK1-interacting protein 1/SMIM24
Mmel_00012272-RA	d3923cf3daf683c479c1fc420eb01229	693	Pfam	PF00001	7 transmembrane receptor (rhodopsin family)	326	596	1e-50	T	31-10-2019	IPR000276	G protein-coupled receptor, rhodopsin-like	GO:0004930|GO:0007186|GO:0016021
Mmel_00012272-RA	d3923cf3daf683c479c1fc420eb01229	693	Pfam	PF00002	7 transmembrane receptor (Secretin family)	17	210	1.4e-31	T	31-10-2019	IPR000832	GPCR, family 2, secretin-like	GO:0004930|GO:0007186|GO:0016021
Mmel_00011992-RA	99b69aca590a66574e0cc4ba94cee639	431	Pfam	PF00595	PDZ domain (Also known as DHR or GLGF)	37	113	5.2e-20	T	31-10-2019	IPR001478	PDZ domain	GO:0005515
Mmel_00011992-RA	99b69aca590a66574e0cc4ba94cee639	431	Pfam	PF07653	Variant SH3 domain	127	191	7e-11	T	31-10-2019	IPR001452	SH3 domain	GO:0005515
Mmel_00011992-RA	99b69aca590a66574e0cc4ba94cee639	431	Pfam	PF00625	Guanylate kinase	246	417	4e-60	T	31-10-2019	IPR008145	Guanylate kinase/L-type calcium channel beta subunit
Mmel_00012383-RA	b27c997e7d5e83fec301c01b32f461a6	442	Pfam	PF13181	Tetratricopeptide repeat	98	128	0.038	T	31-10-2019	IPR019734	Tetratricopeptide repeat	GO:0005515
Mmel_00014632-RA	e165b70a3e4ac9f8878f2f8d0d233954	153	Pfam	PF00808	Histone-like transcription factor (CBF/NF-Y) and archaeal histone	9	73	7.3e-13	T	31-10-2019	IPR003958	Transcription factor CBF/NF-Y/archaeal histone domain
Mmel_00000394-RA	a3d6884c1ffc2d49a6925f5a90522733	828	Pfam	PF00069	Protein kinase domain	46	395	2.6e-52	T	31-10-2019	IPR000719	Protein kinase domain	GO:0004672|GO:0005524|GO:0006468
Mmel_00000394-RA	a3d6884c1ffc2d49a6925f5a90522733	828	Pfam	PF11629	C terminal SARAH domain of Mst1	797	826	2e-09	T	31-10-2019	IPR024205	Mst1 SARAH domain	GO:0004674	KEGG: 04150+2.7.11.1|KEGG: 04151+2.7.11.1|KEGG: 04714+2.7.11.1|KEGG: 04926+2.7.11.1|KEGG: 05165+2.7.11.1|Reactome: R-HSA-2028269
Mmel_00007063-RA	247a3b3cc3fbc7033ed7d978b2dafe4e	385	Pfam	PF01408	Oxidoreductase family, NAD-binding Rossmann fold	7	117	4.7e-14	T	31-10-2019	IPR000683	Oxidoreductase, N-terminal	GO:0016491
Mmel_00013954-RA	5813d9063445f7a4750cfda57d964adf	555	Pfam	PF09532	FDF domain	197	297	3.2e-15	T	31-10-2019	IPR019050	FDF domain
Mmel_00013954-RA	5813d9063445f7a4750cfda57d964adf	555	Pfam	PF16598	Linker region of enhancer of mRNA-decapping protein 3	103	194	1e-44	T	31-10-2019
Mmel_00013954-RA	5813d9063445f7a4750cfda57d964adf	555	Pfam	PF03853	YjeF-related protein N-terminus	302	392	1.7e-10	T	31-10-2019	IPR004443	YjeF N-terminal domain		MetaCyc: PWY-6938
Mmel_00005937-RA	c0956c6746738adc14f18d6be203d07e	583	Pfam	PF01448	ELM2 domain	7	45	1.2e-06	T	31-10-2019	IPR000949	ELM2 domain
Mmel_00005937-RA	c0956c6746738adc14f18d6be203d07e	583	Pfam	PF17226	MTA R1 domain	305	381	1.4e-29	T	31-10-2019	IPR035170	Metastasis-associated protein MTA1, R1 domain		Reactome: R-HSA-3214815|Reactome: R-HSA-427389|Reactome: R-HSA-73762|Reactome: R-HSA-8943724
Mmel_00005937-RA	c0956c6746738adc14f18d6be203d07e	583	Pfam	PF00320	GATA zinc finger	223	259	2.5e-09	T	31-10-2019	IPR000679	Zinc finger, GATA-type	GO:0003700|GO:0006355|GO:0008270|GO:0043565
Mmel_00000045-RA	4b057f168570df2e51094c5347e361c0	2413	Pfam	PF12796	Ankyrin repeats (3 copies)	39	130	3.4e-16	T	31-10-2019	IPR020683	Ankyrin repeat-containing domain
Mmel_00000045-RA	4b057f168570df2e51094c5347e361c0	2413	Pfam	PF00023	Ankyrin repeat	132	164	4.8e-06	T	31-10-2019	IPR002110	Ankyrin repeat	GO:0005515
Mmel_00000045-RA	4b057f168570df2e51094c5347e361c0	2413	Pfam	PF14915	CCDC144C protein coiled-coil region	1569	1873	4.4e-126	T	31-10-2019
Mmel_00000045-RA	4b057f168570df2e51094c5347e361c0	2413	Pfam	PF13857	Ankyrin repeats (many copies)	185	239	3.5e-08	T	31-10-2019
Mmel_00006123-RA	33476f9478e2deb5cda311f51b92e6e3	202	Pfam	PF00188	Cysteine-rich secretory protein family	21	128	6.6e-15	T	31-10-2019	IPR014044	CAP domain
Mmel_00006123-RA	33476f9478e2deb5cda311f51b92e6e3	202	Pfam	PF08562	Crisp	148	201	1.1e-20	T	31-10-2019	IPR013871	Cysteine-rich secretory protein
Mmel_00001538-RA	68258d0f2a4f6258f42a3963b3e45372	534	Pfam	PF00017	SH2 domain	383	459	4.5e-12	T	31-10-2019	IPR000980	SH2 domain
Mmel_00001538-RA	68258d0f2a4f6258f42a3963b3e45372	534	Pfam	PF07525	SOCS box	496	530	3.4e-11	T	31-10-2019	IPR001496	SOCS box domain		Reactome: R-HSA-8951664
Mmel_00011588-RA	42150407a1fa2b9998c4dac09804f2ad	1462	Pfam	PF00168	C2 domain	1031	1139	5e-27	T	31-10-2019	IPR000008	C2 domain
Mmel_00011588-RA	42150407a1fa2b9998c4dac09804f2ad	1462	Pfam	PF00130	Phorbol esters/diacylglycerol binding domain (C1 domain)	908	957	2.2e-10	T	31-10-2019	IPR002219	Protein kinase C-like, phorbol ester/diacylglycerol-binding domain	GO:0035556
Mmel_00011588-RA	42150407a1fa2b9998c4dac09804f2ad	1462	Pfam	PF06292	Domain of Unknown Function (DUF1041)	1348	1454	1.8e-34	T	31-10-2019	IPR010439	Calcium-dependent secretion activator domain
Mmel_00001245-RA	c7063f276d41208e2e20005377db3653	1467	Pfam	PF13589	Histidine kinase-, DNA gyrase B-, and HSP90-like ATPase	30	124	1.3e-08	T	31-10-2019
Mmel_00001245-RA	c7063f276d41208e2e20005377db3653	1467	Pfam	PF01119	DNA mismatch repair protein, C-terminal domain	218	274	6e-06	T	31-10-2019	IPR013507	DNA mismatch repair protein, S5 domain 2-like	GO:0005524|GO:0006298|GO:0030983
Mmel_00001245-RA	c7063f276d41208e2e20005377db3653	1467	Pfam	PF08676	MutL C terminal dimerisation domain	1180	1335	9.1e-12	T	31-10-2019	IPR014790	MutL, C-terminal, dimerisation	GO:0005524|GO:0006298
Mmel_00001228-RA	651013a2adfe855bba12cb2f38e0c284	102	Pfam	PF10044	Retinal tissue protein	40	102	6.1e-17	T	31-10-2019	IPR018737	Protein LIN52	GO:0006351|GO:0007049|GO:0070176	Reactome: R-HSA-1362277|Reactome: R-HSA-1362300|Reactome: R-HSA-1538133|Reactome: R-HSA-156711|Reactome: R-HSA-539107|Reactome: R-HSA-69202|Reactome: R-HSA-69656
Mmel_00000555-RA	63f60dc9d98747373dd1d449ea6af371	784	Pfam	PF09445	RNA cap guanine-N2 methyltransferase	661	726	5.4e-19	T	31-10-2019	IPR019012	RNA cap guanine-N2 methyltransferase	GO:0001510|GO:0008168|GO:0009452	Reactome: R-HSA-1368082|Reactome: R-HSA-1368108|Reactome: R-HSA-191859|Reactome: R-HSA-1989781|Reactome: R-HSA-2032785|Reactome: R-HSA-2151201|Reactome: R-HSA-2426168|Reactome: R-HSA-381340|Reactome: R-HSA-400206|Reactome: R-HSA-400253|Reactome: R-HSA-8951671
Mmel_00013682-RA	724464a2b1a802bf0b836e074dce2725	145	Pfam	PF00188	Cysteine-rich secretory protein family	36	142	5.8e-16	T	31-10-2019	IPR014044	CAP domain
Mmel_00009552-RA	3f7ad9d500740a8337768fabf300a609	4177	Pfam	PF16909	Vacuolar-sorting-associated 13 protein C-terminal	4046	4153	2.1e-19	T	31-10-2019	IPR031645	Vacuolar protein sorting-associated protein 13, C-terminal
Mmel_00009552-RA	3f7ad9d500740a8337768fabf300a609	4177	Pfam	PF00627	UBA/TS-N domain	2515	2550	2.5e-06	T	31-10-2019	IPR015940	Ubiquitin-associated domain
Mmel_00009552-RA	3f7ad9d500740a8337768fabf300a609	4177	Pfam	PF12624	N-terminal region of Chorein or VPS13	6	118	3.6e-33	T	31-10-2019	IPR026854	Vacuolar protein sorting-associated protein 13, N-terminal domain
Mmel_00009552-RA	3f7ad9d500740a8337768fabf300a609	4177	Pfam	PF06650	SHR-binding domain of vacuolar-sorting associated protein 13	3336	3619	2e-74	T	31-10-2019	IPR009543	Vacuolar protein sorting-associated protein 13, SHR-binding domain
Mmel_00009552-RA	3f7ad9d500740a8337768fabf300a609	4177	Pfam	PF16908	Vacuolar sorting-associated protein 13, N-terminal	141	360	5.1e-53	T	31-10-2019	IPR031646	Vacuolar protein sorting-associated protein 13, second N-terminal domain
Mmel_00009552-RA	3f7ad9d500740a8337768fabf300a609	4177	Pfam	PF16910	Repeating coiled region of VPS13	615	896	9.4e-32	T	31-10-2019	IPR031642	VPS13, repeated coiled region
Mmel_00007732-RA	8b0ec5a761654618defc3dac293b6e0c	326	Pfam	PF00561	alpha/beta hydrolase fold	103	175	3.8e-08	T	31-10-2019	IPR000073	Alpha/beta hydrolase fold-1
Mmel_00010412-RA	b7d74a7e30647dbaffcc98cb17187412	714	Pfam	PF00117	Glutamine amidotransferase class-I	24	203	2.7e-39	T	31-10-2019	IPR017926	Glutamine amidotransferase
Mmel_00010412-RA	b7d74a7e30647dbaffcc98cb17187412	714	Pfam	PF00958	GMP synthase C terminal domain	575	665	9.7e-09	T	31-10-2019	IPR001674	GMP synthase, C-terminal	GO:0003922|GO:0005524|GO:0006164|GO:0006177	KEGG: 00230+6.3.5.2|KEGG: 00983+6.3.5.2|MetaCyc: PWY-7221|Reactome: R-HSA-73817
Mmel_00010412-RA	b7d74a7e30647dbaffcc98cb17187412	714	Pfam	PF02540	NAD synthase	218	275	0.00017	T	31-10-2019	IPR022310	NAD/GMP synthase
Mmel_00001215-RA	b2bfd48a076637d1e5f375f0a0556983	765	Pfam	PF08033	Sec23/Sec24 beta-sandwich domain	401	504	6.4e-33	T	31-10-2019	IPR012990	Sec23/Sec24 beta-sandwich		Reactome: R-HSA-1655829|Reactome: R-HSA-204005|Reactome: R-HSA-2132295|Reactome: R-HSA-5694530|Reactome: R-HSA-983170
Mmel_00001215-RA	b2bfd48a076637d1e5f375f0a0556983	765	Pfam	PF00626	Gelsolin repeat	632	718	2.3e-14	T	31-10-2019	IPR007123	Gelsolin-like domain
Mmel_00001215-RA	b2bfd48a076637d1e5f375f0a0556983	765	Pfam	PF04815	Sec23/Sec24 helical domain	518	616	2.5e-27	T	31-10-2019	IPR006900	Sec23/Sec24, helical domain	GO:0006886|GO:0006888|GO:0030127	Reactome: R-HSA-1655829|Reactome: R-HSA-204005|Reactome: R-HSA-2132295|Reactome: R-HSA-5694530|Reactome: R-HSA-983170
Mmel_00001215-RA	b2bfd48a076637d1e5f375f0a0556983	765	Pfam	PF04810	Sec23/Sec24 zinc finger	58	98	4.8e-15	T	31-10-2019	IPR006895	Zinc finger, Sec23/Sec24-type	GO:0006886|GO:0006888|GO:0008270|GO:0030127	Reactome: R-HSA-1655829|Reactome: R-HSA-204005|Reactome: R-HSA-2132295|Reactome: R-HSA-5694530|Reactome: R-HSA-983170
Mmel_00001215-RA	b2bfd48a076637d1e5f375f0a0556983	765	Pfam	PF04811	Sec23/Sec24 trunk domain	126	390	2e-79	T	31-10-2019	IPR006896	Sec23/Sec24, trunk domain	GO:0006886|GO:0006888|GO:0030127	Reactome: R-HSA-1655829|Reactome: R-HSA-204005|Reactome: R-HSA-2132295|Reactome: R-HSA-5694530|Reactome: R-HSA-983170
Mmel_00014277-RA	de9ecea3395860f2f7f33e1743124285	323	Pfam	PF01233	Myristoyl-CoA:protein N-myristoyltransferase, N-terminal domain	20	146	1.2e-65	T	31-10-2019	IPR022676	Myristoyl-CoA:protein N-myristoyltransferase, N-terminal	GO:0004379	Reactome: R-HSA-2514859
Mmel_00014277-RA	de9ecea3395860f2f7f33e1743124285	323	Pfam	PF02799	Myristoyl-CoA:protein N-myristoyltransferase, C-terminal domain	262	314	1.7e-21	T	31-10-2019	IPR022677	Myristoyl-CoA:protein N-myristoyltransferase, C-terminal	GO:0004379	Reactome: R-HSA-2514859
Mmel_00014277-RA	de9ecea3395860f2f7f33e1743124285	323	Pfam	PF02799	Myristoyl-CoA:protein N-myristoyltransferase, C-terminal domain	160	240	1.5e-30	T	31-10-2019	IPR022677	Myristoyl-CoA:protein N-myristoyltransferase, C-terminal	GO:0004379	Reactome: R-HSA-2514859
Mmel_00012066-RA	2396cfd949e39704440deebf993708dd	605	Pfam	PF09380	FERM C-terminal PH-like domain	221	309	3.6e-27	T	31-10-2019	IPR018980	FERM, C-terminal PH-like domain
Mmel_00012066-RA	2396cfd949e39704440deebf993708dd	605	Pfam	PF09379	FERM N-terminal domain	8	68	6.3e-14	T	31-10-2019	IPR018979	FERM, N-terminal
Mmel_00012066-RA	2396cfd949e39704440deebf993708dd	605	Pfam	PF00769	Ezrin/radixin/moesin family	349	590	2.5e-70	T	31-10-2019	IPR011259	Ezrin/radixin/moesin, C-terminal
Mmel_00012066-RA	2396cfd949e39704440deebf993708dd	605	Pfam	PF00373	FERM central domain	91	217	3.2e-24	T	31-10-2019	IPR019748	FERM central domain
Mmel_00001604-RA	4947977e78cf9da845ee46c820a2e52e	342	Pfam	PF05653	Magnesium transporter NIPA	9	283	1.4e-123	T	31-10-2019	IPR008521	Magnesium transporter NIPA	GO:0015095|GO:0015693|GO:0016021	Reactome: R-HSA-5223345
Mmel_00013239-RA	1eb862d637c8ca81e87b048ab98ab9ac	768	Pfam	PF06248	Centromere/kinetochore Zw10	1	106	2.6e-30	T	31-10-2019	IPR009361	RZZ complex, subunit Zw10	GO:0000278|GO:0000775|GO:0005634	Reactome: R-HSA-141444|Reactome: R-HSA-2467813|Reactome: R-HSA-2500257|Reactome: R-HSA-5663220|Reactome: R-HSA-6811434|Reactome: R-HSA-68877
Mmel_00013239-RA	1eb862d637c8ca81e87b048ab98ab9ac	768	Pfam	PF06248	Centromere/kinetochore Zw10	133	608	1.1e-177	T	31-10-2019	IPR009361	RZZ complex, subunit Zw10	GO:0000278|GO:0000775|GO:0005634	Reactome: R-HSA-141444|Reactome: R-HSA-2467813|Reactome: R-HSA-2500257|Reactome: R-HSA-5663220|Reactome: R-HSA-6811434|Reactome: R-HSA-68877
Mmel_00007020-RA	6369228debad58e3c946acf6e4c96b9e	396	Pfam	PF00069	Protein kinase domain	82	355	2.6e-31	T	31-10-2019	IPR000719	Protein kinase domain	GO:0004672|GO:0005524|GO:0006468
Mmel_00010691-RA	f99757eb3107ad6e787d706bcddeaa34	720	Pfam	PF00270	DEAD/DEAH box helicase	190	360	1.1e-44	T	31-10-2019	IPR011545	DEAD/DEAH box helicase domain	GO:0003676|GO:0005524
Mmel_00010691-RA	f99757eb3107ad6e787d706bcddeaa34	720	Pfam	PF00271	Helicase conserved C-terminal domain	403	482	2.6e-17	T	31-10-2019	IPR001650	Helicase, C-terminal
Mmel_00014629-RA	c6828baea1a392c006a7ca20cc5b8675	391	Pfam	PF13851	Growth-arrest specific micro-tubule binding	156	343	1.4e-66	T	31-10-2019	IPR025593	Growth arrest-specific protein 8	GO:0031514|GO:0048870	Reactome: R-HSA-5635838
Mmel_00007133-RA	61651ebda531c2f4826701b811258cb7	806	Pfam	PF00096	Zinc finger, C2H2 type	722	744	0.00015	T	31-10-2019
Mmel_00007133-RA	61651ebda531c2f4826701b811258cb7	806	Pfam	PF00096	Zinc finger, C2H2 type	551	573	2.6e-06	T	31-10-2019
Mmel_00007133-RA	61651ebda531c2f4826701b811258cb7	806	Pfam	PF00096	Zinc finger, C2H2 type	665	687	0.011	T	31-10-2019
Mmel_00007133-RA	61651ebda531c2f4826701b811258cb7	806	Pfam	PF00096	Zinc finger, C2H2 type	636	659	0.0099	T	31-10-2019
Mmel_00007133-RA	61651ebda531c2f4826701b811258cb7	806	Pfam	PF00096	Zinc finger, C2H2 type	429	451	2.3e-05	T	31-10-2019
Mmel_00007133-RA	61651ebda531c2f4826701b811258cb7	806	Pfam	PF00096	Zinc finger, C2H2 type	750	773	0.012	T	31-10-2019
Mmel_00007133-RA	61651ebda531c2f4826701b811258cb7	806	Pfam	PF13909	C2H2-type zinc-finger domain	522	547	3.6e-07	T	31-10-2019
Mmel_00007133-RA	61651ebda531c2f4826701b811258cb7	806	Pfam	PF04704	Zfx / Zfy transcription activation region	66	414	7.2e-142	T	31-10-2019	IPR006794	Transcriptional activator, Zfx / Zfy domain	GO:0003677|GO:0005634|GO:0006355|GO:0046872
Mmel_00003981-RA	72394a99baa67aa5e6ee78cbdbdade8e	1099	Pfam	PF07679	Immunoglobulin I-set domain	307	398	4.5e-11	T	31-10-2019	IPR013098	Immunoglobulin I-set
Mmel_00003981-RA	72394a99baa67aa5e6ee78cbdbdade8e	1099	Pfam	PF07714	Protein tyrosine kinase	587	958	5e-101	T	31-10-2019	IPR001245	Serine-threonine/tyrosine-protein kinase, catalytic domain	GO:0004672|GO:0006468
Mmel_00003981-RA	72394a99baa67aa5e6ee78cbdbdade8e	1099	Pfam	PF13895	Immunoglobulin domain	206	295	4.5e-09	T	31-10-2019	IPR007110	Immunoglobulin-like domain
Mmel_00003268-RA	2cdcf59945bb90ff84ccd39474bba809	1174	Pfam	PF04566	RNA polymerase Rpb2, domain 4	567	629	5.3e-24	T	31-10-2019	IPR007646	RNA polymerase Rpb2, domain 4	GO:0003677|GO:0003899|GO:0006351	KEGG: 00230+2.7.7.6|KEGG: 00240+2.7.7.6
Mmel_00003268-RA	2cdcf59945bb90ff84ccd39474bba809	1174	Pfam	PF04563	RNA polymerase beta subunit	38	441	6.9e-68	T	31-10-2019	IPR007644	RNA polymerase, beta subunit, protrusion	GO:0003677|GO:0003899|GO:0006351	KEGG: 00230+2.7.7.6|KEGG: 00240+2.7.7.6
Mmel_00003268-RA	2cdcf59945bb90ff84ccd39474bba809	1174	Pfam	PF04560	RNA polymerase Rpb2, domain 7	1082	1172	7.1e-34	T	31-10-2019	IPR007641	RNA polymerase Rpb2, domain 7	GO:0003677|GO:0003899|GO:0006351	KEGG: 00230+2.7.7.6|KEGG: 00240+2.7.7.6
Mmel_00003268-RA	2cdcf59945bb90ff84ccd39474bba809	1174	Pfam	PF04565	RNA polymerase Rpb2, domain 3	468	532	1.6e-23	T	31-10-2019	IPR007645	RNA polymerase Rpb2, domain 3	GO:0003677|GO:0003899|GO:0006351	KEGG: 00230+2.7.7.6|KEGG: 00240+2.7.7.6
Mmel_00003268-RA	2cdcf59945bb90ff84ccd39474bba809	1174	Pfam	PF04567	RNA polymerase Rpb2, domain 5	653	700	1.7e-18	T	31-10-2019	IPR007647	RNA polymerase Rpb2, domain 5	GO:0006351	KEGG: 00230+2.7.7.6|KEGG: 00240+2.7.7.6
Mmel_00003268-RA	2cdcf59945bb90ff84ccd39474bba809	1174	Pfam	PF00562	RNA polymerase Rpb2, domain 6	707	1080	6.5e-128	T	31-10-2019	IPR007120	DNA-directed RNA polymerase, subunit 2, hybrid-binding domain	GO:0003677|GO:0003899|GO:0006351	KEGG: 00230+2.7.7.6|KEGG: 00240+2.7.7.6
Mmel_00003268-RA	2cdcf59945bb90ff84ccd39474bba809	1174	Pfam	PF04561	RNA polymerase Rpb2, domain 2	201	394	8.4e-56	T	31-10-2019	IPR007642	RNA polymerase Rpb2, domain 2	GO:0003677|GO:0003899|GO:0006351	KEGG: 00230+2.7.7.6|KEGG: 00240+2.7.7.6
Mmel_00002731-RA	b25601e9fb54b8e7431c837f739dad19	889	Pfam	PF01593	Flavin containing amine oxidoreductase	460	886	1.1e-89	T	31-10-2019	IPR002937	Amine oxidase	GO:0016491|GO:0055114
Mmel_00002731-RA	b25601e9fb54b8e7431c837f739dad19	889	Pfam	PF04433	SWIRM domain	357	430	1e-07	T	31-10-2019	IPR007526	SWIRM domain	GO:0005515
Mmel_00002731-RA	b25601e9fb54b8e7431c837f739dad19	889	Pfam	PF05724	Thiopurine S-methyltransferase (TPMT)	5	48	3.4e-06	T	31-10-2019	IPR008854	TPMT family	GO:0008757	KEGG: 00983+2.1.1.67|Reactome: R-HSA-156581|Reactome: R-HSA-5578995
Mmel_00002731-RA	b25601e9fb54b8e7431c837f739dad19	889	Pfam	PF07496	CW-type Zinc Finger	207	259	2.4e-10	T	31-10-2019	IPR011124	Zinc finger, CW-type	GO:0008270
Mmel_00000245-RA	f5db3f7e1ccdc854a1fcbea918afbfb0	1196	Pfam	PF08337	Plexin cytoplasmic RasGAP domain	640	1163	1.9e-198	T	31-10-2019	IPR013548	Plexin, cytoplasmic RasGAP domain
Mmel_00000245-RA	f5db3f7e1ccdc854a1fcbea918afbfb0	1196	Pfam	PF01437	Plexin repeat	128	171	1.1e-07	T	31-10-2019	IPR002165	Plexin repeat
Mmel_00000245-RA	f5db3f7e1ccdc854a1fcbea918afbfb0	1196	Pfam	PF01833	IPT/TIG domain	379	419	2.3e-06	T	31-10-2019	IPR002909	IPT domain
Mmel_00000245-RA	f5db3f7e1ccdc854a1fcbea918afbfb0	1196	Pfam	PF01833	IPT/TIG domain	288	375	2.4e-07	T	31-10-2019	IPR002909	IPT domain
Mmel_00009780-RA	48e32b6aa90232e351e43fde40b6c7b0	685	Pfam	PF00615	Regulator of G protein signaling domain	350	470	3.2e-12	T	31-10-2019	IPR016137	RGS domain
Mmel_00009780-RA	48e32b6aa90232e351e43fde40b6c7b0	685	Pfam	PF00615	Regulator of G protein signaling domain	258	334	5.5e-09	T	31-10-2019	IPR016137	RGS domain
Mmel_00009831-RA	da50af12f949702bd2017a90581403df	562	Pfam	PF00786	P21-Rho-binding domain	74	132	1.1e-24	T	31-10-2019	IPR000095	CRIB domain
Mmel_00009831-RA	da50af12f949702bd2017a90581403df	562	Pfam	PF00069	Protein kinase domain	269	538	4e-69	T	31-10-2019	IPR000719	Protein kinase domain	GO:0004672|GO:0005524|GO:0006468
Mmel_00005868-RA	35ccfb95e6f5bb877ba7c56463cf22cf	1683	Pfam	PF00458	WHEP-TRS domain	1053	1103	3.2e-19	T	31-10-2019	IPR000738	WHEP-TRS domain	GO:0004812|GO:0005524|GO:0006418	Reactome: R-HSA-379716
Mmel_00005868-RA	35ccfb95e6f5bb877ba7c56463cf22cf	1683	Pfam	PF00458	WHEP-TRS domain	816	868	1e-21	T	31-10-2019	IPR000738	WHEP-TRS domain	GO:0004812|GO:0005524|GO:0006418	Reactome: R-HSA-379716
Mmel_00005868-RA	35ccfb95e6f5bb877ba7c56463cf22cf	1683	Pfam	PF00458	WHEP-TRS domain	893	945	1.9e-23	T	31-10-2019	IPR000738	WHEP-TRS domain	GO:0004812|GO:0005524|GO:0006418	Reactome: R-HSA-379716
Mmel_00005868-RA	35ccfb95e6f5bb877ba7c56463cf22cf	1683	Pfam	PF00458	WHEP-TRS domain	743	795	8e-24	T	31-10-2019	IPR000738	WHEP-TRS domain	GO:0004812|GO:0005524|GO:0006418	Reactome: R-HSA-379716
Mmel_00005868-RA	35ccfb95e6f5bb877ba7c56463cf22cf	1683	Pfam	PF00458	WHEP-TRS domain	976	1028	1.1e-22	T	31-10-2019	IPR000738	WHEP-TRS domain	GO:0004812|GO:0005524|GO:0006418	Reactome: R-HSA-379716
Mmel_00005868-RA	35ccfb95e6f5bb877ba7c56463cf22cf	1683	Pfam	PF03950	tRNA synthetases class I (E and Q), anti-codon binding domain	489	666	4.3e-37	T	31-10-2019	IPR020059	Glutamyl/glutaminyl-tRNA synthetase, class Ib, anti-codon binding domain	GO:0000166|GO:0004812|GO:0005524|GO:0005737|GO:0006418	Reactome: R-HSA-2408517|Reactome: R-HSA-379716
Mmel_00005868-RA	35ccfb95e6f5bb877ba7c56463cf22cf	1683	Pfam	PF00587	tRNA synthetase class II core domain (G, H, P, S and T)	1264	1433	5.1e-16	T	31-10-2019	IPR002314	Aminoacyl-tRNA synthetase, class II (G/ P/ S/T)	GO:0000166|GO:0004812|GO:0005524|GO:0006418
Mmel_00005868-RA	35ccfb95e6f5bb877ba7c56463cf22cf	1683	Pfam	PF03129	Anticodon binding domain	1453	1553	1.2e-17	T	31-10-2019	IPR004154	Anticodon-binding
Mmel_00005868-RA	35ccfb95e6f5bb877ba7c56463cf22cf	1683	Pfam	PF00749	tRNA synthetases class I (E and Q), catalytic domain	182	486	1.2e-121	T	31-10-2019	IPR020058	Glutamyl/glutaminyl-tRNA synthetase, class Ib, catalytic domain	GO:0004812|GO:0005524|GO:0043039
Mmel_00007271-RA	d279d14ae1989a1019d1330cb816f6bc	90	Pfam	PF05236	Transcription initiation factor TFIID component TAF4 family	1	53	5.3e-11	T	31-10-2019	IPR007900	Transcription initiation factor TFIID component TAF4	GO:0005669|GO:0006352	Reactome: R-HSA-167161|Reactome: R-HSA-167162|Reactome: R-HSA-167172|Reactome: R-HSA-674695|Reactome: R-HSA-6804756|Reactome: R-HSA-73776|Reactome: R-HSA-73779|Reactome: R-HSA-75953|Reactome: R-HSA-76042
Mmel_00013488-RA	875073c56d649ec077e4108f935bea4f	100	Pfam	PF04832	SOUL heme-binding protein	45	96	5.6e-06	T	31-10-2019	IPR006917	SOUL haem-binding protein
Mmel_00001761-RA	34094f2eff5fe2b4d02a9106b8d54d90	405	Pfam	PF15967	Nucleoporin FG repeated region	1	280	2e-121	T	31-10-2019
Mmel_00007176-RA	7284a7890793f883ae7b44d3155a2dd8	841	Pfam	PF02825	WWE domain	103	174	0.00013	T	31-10-2019	IPR004170	WWE domain
Mmel_00007176-RA	7284a7890793f883ae7b44d3155a2dd8	841	Pfam	PF00536	SAM domain (Sterile alpha motif)	485	539	3.9e-13	T	31-10-2019	IPR001660	Sterile alpha motif domain	GO:0005515
Mmel_00007176-RA	7284a7890793f883ae7b44d3155a2dd8	841	Pfam	PF02862	DDHD domain	620	829	2.4e-57	T	31-10-2019	IPR004177	DDHD domain	GO:0046872
Mmel_00002780-RA	9f80a9875749592ea1aad114d955e0d2	412	Pfam	PF03615	GCM motif protein	32	96	5.2e-20	T	31-10-2019	IPR003902	Transcription regulator GCM domain	GO:0003677|GO:0006355
Mmel_00010618-RA	0938532211e1bf184d1498ab15f21a35	711	Pfam	PF02145	Rap/ran-GAP	22	60	2.1e-11	T	31-10-2019	IPR000331	Rap GTPase activating protein domain	GO:0005096|GO:0051056
Mmel_00010618-RA	0938532211e1bf184d1498ab15f21a35	711	Pfam	PF02145	Rap/ran-GAP	75	211	1.8e-37	T	31-10-2019	IPR000331	Rap GTPase activating protein domain	GO:0005096|GO:0051056
Mmel_00010618-RA	0938532211e1bf184d1498ab15f21a35	711	Pfam	PF00780	CNH domain	272	565	9.3e-59	T	31-10-2019	IPR001180	Citron homology (CNH) domain
Mmel_00004668-RA	0ecbaff5c3f36f09f7d90b2a13e23743	675	Pfam	PF00595	PDZ domain (Also known as DHR or GLGF)	258	331	2.3e-11	T	31-10-2019	IPR001478	PDZ domain	GO:0005515
Mmel_00004668-RA	0ecbaff5c3f36f09f7d90b2a13e23743	675	Pfam	PF02828	L27 domain	186	235	5.8e-09	T	31-10-2019	IPR014775	L27 domain, C-terminal
Mmel_00004668-RA	0ecbaff5c3f36f09f7d90b2a13e23743	675	Pfam	PF07653	Variant SH3 domain	349	411	2.8e-12	T	31-10-2019	IPR001452	SH3 domain	GO:0005515
Mmel_00004668-RA	0ecbaff5c3f36f09f7d90b2a13e23743	675	Pfam	PF00625	Guanylate kinase	479	661	2.7e-51	T	31-10-2019	IPR008145	Guanylate kinase/L-type calcium channel beta subunit
Mmel_00004668-RA	0ecbaff5c3f36f09f7d90b2a13e23743	675	Pfam	PF09060	L27_N	123	170	2e-24	T	31-10-2019	IPR015145	L27-N		Reactome: R-HSA-420029
Mmel_00001105-RA	3e14d87299e415592c7c36a19d39b15e	437	Pfam	PF00646	F-box domain	255	286	2e-06	T	31-10-2019	IPR001810	F-box domain	GO:0005515
Mmel_00001105-RA	3e14d87299e415592c7c36a19d39b15e	437	Pfam	PF01485	IBR domain, a half RING-finger domain	356	409	7.5e-06	T	31-10-2019	IPR002867	IBR domain		MetaCyc: PWY-7511
Mmel_00001636-RA	4e81501840d6db0db6f16dfabb19a46d	912	Pfam	PF11411	DNA ligase IV	755	787	4.9e-18	T	31-10-2019	IPR021536	DNA ligase IV domain	GO:0003910	Reactome: R-HSA-164843|Reactome: R-HSA-5693571
Mmel_00001636-RA	4e81501840d6db0db6f16dfabb19a46d	912	Pfam	PF04679	ATP dependent DNA ligase C terminal region	481	593	1.8e-17	T	31-10-2019	IPR012309	DNA ligase, ATP-dependent, C-terminal	GO:0003910|GO:0006281|GO:0006310
Mmel_00001636-RA	4e81501840d6db0db6f16dfabb19a46d	912	Pfam	PF04675	DNA ligase N terminus	20	213	9.8e-43	T	31-10-2019	IPR012308	DNA ligase, ATP-dependent, N-terminal	GO:0003677|GO:0003910|GO:0006281|GO:0006310
Mmel_00001636-RA	4e81501840d6db0db6f16dfabb19a46d	912	Pfam	PF01068	ATP dependent DNA ligase domain	253	456	5.8e-54	T	31-10-2019	IPR012310	DNA ligase, ATP-dependent, central	GO:0003910|GO:0005524|GO:0006281|GO:0006310
Mmel_00001636-RA	4e81501840d6db0db6f16dfabb19a46d	912	Pfam	PF16589	BRCT domain, a BRCA1 C-terminus domain	661	745	2.3e-10	T	31-10-2019	IPR001357	BRCT domain
Mmel_00005466-RA	6f182846f6fd917687d0c55b3ee009ef	1063	Pfam	PF07714	Protein tyrosine kinase	496	735	3e-34	T	31-10-2019	IPR001245	Serine-threonine/tyrosine-protein kinase, catalytic domain	GO:0004672|GO:0006468
Mmel_00005466-RA	6f182846f6fd917687d0c55b3ee009ef	1063	Pfam	PF01094	Receptor family ligand binding region	107	372	1.4e-06	T	31-10-2019	IPR001828	Receptor, ligand binding region
Mmel_00005466-RA	6f182846f6fd917687d0c55b3ee009ef	1063	Pfam	PF00211	Adenylate and Guanylate cyclase catalytic domain	807	991	8.6e-67	T	31-10-2019	IPR001054	Adenylyl cyclase class-3/4/guanylyl cyclase	GO:0009190|GO:0016849|GO:0035556
Mmel_00011671-RA	674e948cecd1d0e4acfb9b1314389271	134	Pfam	PF15099	Phosphoinositide-interacting protein family	7	134	8e-61	T	31-10-2019	IPR028068	Phosphoinositide-interacting protein
Mmel_00003906-RA	dfaf58fc230e1d34205589383fb8c247	143	Pfam	PF07281	Insulin-induced protein (INSIG)	4	142	3.9e-37	T	31-10-2019	IPR025929	Insulin-induced protein family		Reactome: R-HSA-1655829
Mmel_00008359-RA	8c52d1de74111b15a18b0567abcf8a26	484	Pfam	PF00004	ATPase family associated with various cellular activities (AAA)	316	447	1.4e-36	T	31-10-2019	IPR003959	ATPase, AAA-type, core	GO:0005524
Mmel_00008359-RA	8c52d1de74111b15a18b0567abcf8a26	484	Pfam	PF08513	LisH	52	78	2e-06	T	31-10-2019	IPR006594	LIS1 homology motif	GO:0005515
Mmel_00005471-RA	bffd864ac8a109af7c0d0f408557310e	151	Pfam	PF00042	Globin	12	115	1.1e-30	T	31-10-2019	IPR000971	Globin	GO:0020037
Mmel_00014401-RA	bbc6c6b31ce069c1ab7c92dfaefbf92f	291	Pfam	PF01421	Reprolysin (M12B) family zinc metalloprotease	33	123	1e-07	T	31-10-2019	IPR001590	Peptidase M12B, ADAM/reprolysin	GO:0004222|GO:0006508
Mmel_00014401-RA	bbc6c6b31ce069c1ab7c92dfaefbf92f	291	Pfam	PF00090	Thrombospondin type 1 domain	249	285	2e-05	T	31-10-2019	IPR000884	Thrombospondin type-1 (TSP1) repeat
Mmel_00001146-RA	b0339f41d03375da1442c84059d4836d	125	Pfam	PF00383	Cytidine and deoxycytidylate deaminase zinc-binding region	12	70	1.1e-11	T	31-10-2019	IPR002125	Cytidine and deoxycytidylate deaminase domain
Mmel_00004279-RA	0e18f71f798d79d5ff91458441852ce7	386	Pfam	PF13696	Zinc knuckle	220	240	3.6e-11	T	31-10-2019	IPR025829	Zinc knuckle CX2CX3GHX4C
Mmel_00000960-RA	a02219288651a241e3a61af30db5259e	633	Pfam	PF00178	Ets-domain	215	294	2.9e-34	T	31-10-2019	IPR000418	Ets domain	GO:0003700|GO:0006355|GO:0043565
Mmel_00000960-RA	a02219288651a241e3a61af30db5259e	633	Pfam	PF12310	Transcription factor protein N terminal	11	118	2.5e-46	T	31-10-2019	IPR022084	Transcription factor Elf, N-terminal
Mmel_00002944-RA	44a6dceb3531dcdb59824cf4c0348c88	687	Pfam	PF02141	DENN (AEX-3) domain	384	500	9.7e-33	T	31-10-2019	IPR001194	cDENN domain		Reactome: R-HSA-8876198
Mmel_00002944-RA	44a6dceb3531dcdb59824cf4c0348c88	687	Pfam	PF03456	uDENN domain	246	316	1.9e-11	T	31-10-2019	IPR005113	uDENN domain		Reactome: R-HSA-8876198
Mmel_00008561-RA	69897509750e2208b017b046b6c69119	731	Pfam	PF00096	Zinc finger, C2H2 type	632	653	0.0018	T	31-10-2019
Mmel_00008561-RA	69897509750e2208b017b046b6c69119	731	Pfam	PF00096	Zinc finger, C2H2 type	373	395	0.012	T	31-10-2019
Mmel_00008561-RA	69897509750e2208b017b046b6c69119	731	Pfam	PF00096	Zinc finger, C2H2 type	345	367	0.00031	T	31-10-2019
Mmel_00008561-RA	69897509750e2208b017b046b6c69119	731	Pfam	PF00096	Zinc finger, C2H2 type	130	152	0.00094	T	31-10-2019
Mmel_00008561-RA	69897509750e2208b017b046b6c69119	731	Pfam	PF13909	C2H2-type zinc-finger domain	158	181	1.4e-07	T	31-10-2019
Mmel_00008561-RA	69897509750e2208b017b046b6c69119	731	Pfam	PF16606	Unstructured conserved, between two C2H2-type zinc-fingers	657	724	6.5e-36	T	31-10-2019
Mmel_00000735-RA	99ee246100ad8df75fcfb447a940010f	227	Pfam	PF00560	Leucine Rich Repeat	83	104	0.17	T	31-10-2019	IPR001611	Leucine-rich repeat	GO:0005515
Mmel_00000735-RA	99ee246100ad8df75fcfb447a940010f	227	Pfam	PF13855	Leucine rich repeat	37	79	1.4e-11	T	31-10-2019	IPR001611	Leucine-rich repeat	GO:0005515
Mmel_00000735-RA	99ee246100ad8df75fcfb447a940010f	227	Pfam	PF01462	Leucine rich repeat N-terminal domain	1	31	4.8e-09	T	31-10-2019	IPR000372	Leucine-rich repeat N-terminal domain
Mmel_00007430-RA	9e01d07aad81e43f4d9c9ae00061a1b3	218	Pfam	PF01271	Granin (chromogranin or secretogranin)	12	176	5.6e-18	T	31-10-2019	IPR001990	Chromogranin A/B/C	GO:0030141
Mmel_00009996-RA	c418fb2a30568d65e7c50f38637a786f	869	Pfam	PF08487	Vault protein inter-alpha-trypsin domain	30	141	9.5e-33	T	31-10-2019	IPR013694	VIT domain
Mmel_00009996-RA	c418fb2a30568d65e7c50f38637a786f	869	Pfam	PF06668	Inter-alpha-trypsin inhibitor heavy chain C-terminus	692	842	3.4e-24	T	31-10-2019	IPR010600	Inter-alpha-trypsin inhibitor heavy chain, C-terminal	GO:0004867|GO:0030212
Mmel_00009996-RA	c418fb2a30568d65e7c50f38637a786f	869	Pfam	PF00092	von Willebrand factor type A domain	269	447	4e-25	T	31-10-2019	IPR002035	von Willebrand factor, type A
Mmel_00003649-RA	af6bae8a95089ed2a3dd9bdab026009f	811	Pfam	PF06328	Ig-like C2-type domain	55	132	1.2e-12	T	31-10-2019	IPR010457	Immunoglobulin C2-set-like, ligand-binding
Mmel_00003649-RA	af6bae8a95089ed2a3dd9bdab026009f	811	Pfam	PF00041	Fibronectin type III domain	497	565	7.9e-10	T	31-10-2019	IPR003961	Fibronectin type III	GO:0005515
Mmel_00003649-RA	af6bae8a95089ed2a3dd9bdab026009f	811	Pfam	PF00041	Fibronectin type III domain	312	383	6.6e-06	T	31-10-2019	IPR003961	Fibronectin type III	GO:0005515
Mmel_00001553-RA	1dd1b1ad374ebd26f4f75a641907d8bb	541	Pfam	PF01582	TIR domain	369	522	6.6e-36	T	31-10-2019	IPR000157	Toll/interleukin-1 receptor homology (TIR) domain	GO:0005515|GO:0007165
Mmel_00001553-RA	1dd1b1ad374ebd26f4f75a641907d8bb	541	Pfam	PF13895	Immunoglobulin domain	120	179	4.6e-07	T	31-10-2019	IPR007110	Immunoglobulin-like domain
Mmel_00011853-RA	e3a9773958392ffb4ea2064d4b1ae660	986	Pfam	PF14670	Coagulation Factor Xa inhibitory site	531	563	3.3e-08	T	31-10-2019
Mmel_00011853-RA	e3a9773958392ffb4ea2064d4b1ae660	986	Pfam	PF01400	Astacin (Peptidase family M12A)	105	296	1.7e-73	T	31-10-2019	IPR001506	Peptidase M12A	GO:0004222|GO:0006508
Mmel_00011853-RA	e3a9773958392ffb4ea2064d4b1ae660	986	Pfam	PF00431	CUB domain	723	831	2.1e-38	T	31-10-2019	IPR000859	CUB domain
Mmel_00011853-RA	e3a9773958392ffb4ea2064d4b1ae660	986	Pfam	PF00431	CUB domain	411	520	2.1e-39	T	31-10-2019	IPR000859	CUB domain
Mmel_00011853-RA	e3a9773958392ffb4ea2064d4b1ae660	986	Pfam	PF00431	CUB domain	298	407	8.3e-33	T	31-10-2019	IPR000859	CUB domain
Mmel_00011853-RA	e3a9773958392ffb4ea2064d4b1ae660	986	Pfam	PF00431	CUB domain	844	920	2.9e-19	T	31-10-2019	IPR000859	CUB domain
Mmel_00011853-RA	e3a9773958392ffb4ea2064d4b1ae660	986	Pfam	PF00431	CUB domain	567	676	1.2e-37	T	31-10-2019	IPR000859	CUB domain
Mmel_00011853-RA	e3a9773958392ffb4ea2064d4b1ae660	986	Pfam	PF07645	Calcium-binding EGF domain	679	718	0.00011	T	31-10-2019	IPR001881	EGF-like calcium-binding domain	GO:0005509
Mmel_00002706-RA	e064217872a07beddb72b1679169f9a0	269	Pfam	PF00520	Ion transport protein	13	219	6.3e-36	T	31-10-2019	IPR005821	Ion transport domain	GO:0005216|GO:0006811|GO:0016020|GO:0055085
Mmel_00004895-RA	17f476c11d872807d9822850031dcbc7	404	Pfam	PF00020	TNFR/NGFR cysteine-rich region	87	128	6.5e-09	T	31-10-2019	IPR001368	TNFR/NGFR cysteine-rich region	GO:0005515
Mmel_00004895-RA	17f476c11d872807d9822850031dcbc7	404	Pfam	PF00531	Death domain	309	388	2e-17	T	31-10-2019	IPR000488	Death domain	GO:0005515|GO:0007165
Mmel_00002188-RA	33b30cf4d211507d2d53ce21d5341714	802	Pfam	PF13855	Leucine rich repeat	636	694	4.5e-10	T	31-10-2019	IPR001611	Leucine-rich repeat	GO:0005515
Mmel_00002188-RA	33b30cf4d211507d2d53ce21d5341714	802	Pfam	PF13855	Leucine rich repeat	706	763	2.7e-07	T	31-10-2019	IPR001611	Leucine-rich repeat	GO:0005515
Mmel_00002188-RA	33b30cf4d211507d2d53ce21d5341714	802	Pfam	PF12534	Pannexin-like TM region of LRRC8	1	337	4e-150	T	31-10-2019	IPR021040	LRRC8, pannexin-like TM region		Reactome: R-HSA-5223345
Mmel_00002188-RA	33b30cf4d211507d2d53ce21d5341714	802	Pfam	PF13306	Leucine rich repeats (6 copies)	530	574	0.083	T	31-10-2019	IPR026906	Leucine rich repeat 5
Mmel_00007550-RA	f2ddc71f908cfe11ccec15687511076f	3580	Pfam	PF15785	Serine/threonine-protein kinase smg-1	603	701	5.6e-41	T	31-10-2019	IPR031559	Serine/threonine-protein kinase SMG1	GO:0000184|GO:0004674|GO:0016310	KEGG: 04150+2.7.11.1|KEGG: 04151+2.7.11.1|KEGG: 04714+2.7.11.1|KEGG: 04926+2.7.11.1|KEGG: 05165+2.7.11.1|Reactome: R-HSA-975957
Mmel_00007550-RA	f2ddc71f908cfe11ccec15687511076f	3580	Pfam	PF15785	Serine/threonine-protein kinase smg-1	700	1143	6.3e-182	T	31-10-2019	IPR031559	Serine/threonine-protein kinase SMG1	GO:0000184|GO:0004674|GO:0016310	KEGG: 04150+2.7.11.1|KEGG: 04151+2.7.11.1|KEGG: 04714+2.7.11.1|KEGG: 04926+2.7.11.1|KEGG: 05165+2.7.11.1|Reactome: R-HSA-975957
Mmel_00007550-RA	f2ddc71f908cfe11ccec15687511076f	3580	Pfam	PF02260	FATC domain	3550	3579	2.2e-11	T	31-10-2019	IPR003152	FATC domain	GO:0005515	KEGG: 04150+2.7.11.1|KEGG: 04151+2.7.11.1|KEGG: 04714+2.7.11.1|KEGG: 04926+2.7.11.1|KEGG: 05165+2.7.11.1
Mmel_00007550-RA	f2ddc71f908cfe11ccec15687511076f	3580	Pfam	PF00454	Phosphatidylinositol 3- and 4-kinase	2161	2437	2.5e-52	T	31-10-2019	IPR000403	Phosphatidylinositol 3-/4-kinase, catalytic domain
Mmel_00007550-RA	f2ddc71f908cfe11ccec15687511076f	3580	Pfam	PF17229	Region of unknown function (DUF5303)	4	112	5.5e-49	T	31-10-2019	IPR035175	Serine/threonine-protein kinase SMG1, N-terminal
Mmel_00012312-RA	ed019c7857d44d65ddd6b1708e5c8fdc	349	Pfam	PF00001	7 transmembrane receptor (rhodopsin family)	47	299	2.3e-33	T	31-10-2019	IPR000276	G protein-coupled receptor, rhodopsin-like	GO:0004930|GO:0007186|GO:0016021
Mmel_00005415-RA	f503f5583cbcc1c4114ce85fa40a86e4	127	Pfam	PF00057	Low-density lipoprotein receptor domain class A	90	125	5e-11	T	31-10-2019	IPR002172	Low-density lipoprotein (LDL) receptor class A repeat	GO:0005515
Mmel_00005415-RA	f503f5583cbcc1c4114ce85fa40a86e4	127	Pfam	PF00057	Low-density lipoprotein receptor domain class A	4	40	2.3e-09	T	31-10-2019	IPR002172	Low-density lipoprotein (LDL) receptor class A repeat	GO:0005515
Mmel_00005415-RA	f503f5583cbcc1c4114ce85fa40a86e4	127	Pfam	PF00057	Low-density lipoprotein receptor domain class A	50	81	2.7e-05	T	31-10-2019	IPR002172	Low-density lipoprotein (LDL) receptor class A repeat	GO:0005515
Mmel_00012526-RA	b2335f4c34ef8d02dbc875f3f93331e3	302	Pfam	PF00615	Regulator of G protein signaling domain	173	287	6e-38	T	31-10-2019	IPR016137	RGS domain
Mmel_00003702-RA	1614ea6e55a492cf758ee04bfed51c96	260	Pfam	PF10568	Outer mitochondrial membrane transport complex protein	4	94	1.1e-26	T	31-10-2019	IPR019564	Mitochondrial outer membrane transport complex Sam37/metaxin, N-terminal domain	GO:0005741|GO:0006626
Mmel_00003702-RA	1614ea6e55a492cf758ee04bfed51c96	260	Pfam	PF17171	Glutathione S-transferase, C-terminal domain	125	188	9.4e-24	T	31-10-2019	IPR033468	Metaxin, glutathione S-transferase domain
Mmel_00005248-RA	123fc95501346790958e90fd277481c1	1117	Pfam	PF07443	HepA-related protein (HARP)	397	420	8.4e-08	T	31-10-2019	IPR010003	HARP domain
Mmel_00005248-RA	123fc95501346790958e90fd277481c1	1117	Pfam	PF07443	HepA-related protein (HARP)	484	538	4.5e-24	T	31-10-2019	IPR010003	HARP domain
Mmel_00005248-RA	123fc95501346790958e90fd277481c1	1117	Pfam	PF00271	Helicase conserved C-terminal domain	853	961	2.9e-14	T	31-10-2019	IPR001650	Helicase, C-terminal
Mmel_00005248-RA	123fc95501346790958e90fd277481c1	1117	Pfam	PF00176	SNF2 family N-terminal domain	594	814	3.9e-25	T	31-10-2019	IPR000330	SNF2-related, N-terminal domain	GO:0005524
Mmel_00000801-RA	56e581c3a8f8b53108df80d34b8e4b05	334	Pfam	PF00001	7 transmembrane receptor (rhodopsin family)	49	289	1.3e-43	T	31-10-2019	IPR000276	G protein-coupled receptor, rhodopsin-like	GO:0004930|GO:0007186|GO:0016021
Mmel_00009891-RA	3a6b4eb6777f5b4e59d25c6ce7c36c27	1051	Pfam	PF15923	Domain of unknown function (DUF4745)	58	185	1.1e-47	T	31-10-2019	IPR031813	Domain of unknown function DUF4745
Mmel_00005610-RA	1c08fbd7e206df9fe475a8312c071ca1	188	Pfam	PF00010	Helix-loop-helix DNA-binding domain	83	132	6e-17	T	31-10-2019	IPR011598	Myc-type, basic helix-loop-helix (bHLH) domain	GO:0046983
Mmel_00004304-RA	031fafa96d56561ef498f661cf86dc9c	352	Pfam	PF00089	Trypsin	243	334	7.8e-30	T	31-10-2019	IPR001254	Serine proteases, trypsin domain	GO:0004252|GO:0006508
Mmel_00004304-RA	031fafa96d56561ef498f661cf86dc9c	352	Pfam	PF00089	Trypsin	136	237	1.8e-21	T	31-10-2019	IPR001254	Serine proteases, trypsin domain	GO:0004252|GO:0006508
Mmel_00004304-RA	031fafa96d56561ef498f661cf86dc9c	352	Pfam	PF00051	Kringle domain	43	121	2.5e-17	T	31-10-2019	IPR000001	Kringle
Mmel_00009773-RA	870ca721f1e9f1ffc54d779338940ee1	341	Pfam	PF13905	Thioredoxin-like	101	193	1.2e-28	T	31-10-2019	IPR012336	Thioredoxin-like fold
Mmel_00009773-RA	870ca721f1e9f1ffc54d779338940ee1	341	Pfam	PF13848	Thioredoxin-like domain	217	330	4.6e-07	T	31-10-2019
Mmel_00005523-RA	e6e2fb21f5ea7df278f563c368147d55	337	Pfam	PF03281	Mab-21 protein	197	320	8e-16	T	31-10-2019	IPR024810	Mab-21 domain
Mmel_00007652-RA	c10168b141022d2f821758e23f75ddf2	917	Pfam	PF06743	FAST kinase-like protein, subdomain 1	574	640	2.3e-18	T	31-10-2019	IPR010622	FAST kinase leucine-rich	GO:0004672
Mmel_00007652-RA	c10168b141022d2f821758e23f75ddf2	917	Pfam	PF08373	RAP domain	780	838	6.4e-13	T	31-10-2019	IPR013584	RAP domain
Mmel_00007652-RA	c10168b141022d2f821758e23f75ddf2	917	Pfam	PF08368	FAST kinase-like protein, subdomain 2	658	741	2.6e-26	T	31-10-2019	IPR013579	FAST kinase-like protein, subdomain 2
Mmel_00011094-RA	0bce1c56f7184b60371026294c3fb8b6	911	Pfam	PF02185	Hr1 repeat	134	194	4.2e-16	T	31-10-2019	IPR011072	HR1 rho-binding domain	GO:0007165
Mmel_00011094-RA	0bce1c56f7184b60371026294c3fb8b6	911	Pfam	PF02185	Hr1 repeat	218	278	2.4e-16	T	31-10-2019	IPR011072	HR1 rho-binding domain	GO:0007165
Mmel_00011094-RA	0bce1c56f7184b60371026294c3fb8b6	911	Pfam	PF02185	Hr1 repeat	46	101	9.6e-14	T	31-10-2019	IPR011072	HR1 rho-binding domain	GO:0007165
Mmel_00011094-RA	0bce1c56f7184b60371026294c3fb8b6	911	Pfam	PF00069	Protein kinase domain	583	839	4.3e-62	T	31-10-2019	IPR000719	Protein kinase domain	GO:0004672|GO:0005524|GO:0006468
Mmel_00011094-RA	0bce1c56f7184b60371026294c3fb8b6	911	Pfam	PF00433	Protein kinase C terminal domain	863	903	1.5e-08	T	31-10-2019	IPR017892	Protein kinase, C-terminal	GO:0004674|GO:0005524|GO:0006468
Mmel_00010387-RA	aa26039e895bce1a1fdb94d9d539e75e	504	Pfam	PF16682	CXC domain of E3 ubiquitin-protein ligase MSL2	383	435	6.2e-19	T	31-10-2019	IPR032049	E3 ubiquitin-protein ligase Msl2, CXC domain		Reactome: R-HSA-3214847
Mmel_00010387-RA	aa26039e895bce1a1fdb94d9d539e75e	504	Pfam	PF16685	zinc RING finger of MSL2	2	36	1.6e-13	T	31-10-2019	IPR032043	E3 ubiquitin-protein ligase Msl2, zinc RING finger	GO:0061630	Reactome: R-HSA-3214847
[truncated: 20,553 more rows]

## Sheet: GO_terms
Gene name	Sequence md5 digest	Seq len	Analysis	Signature Accession	Signature description	Start	Stop	E-value	score	Date	Interproscan accession	Interproscan annotations	GO annotations	Pathway annotations
Mmel_00014707-RA	dfab5dd270b89a4c16bedcff2a1ac05f	587	Pfam	PF15787	Domain of unknown function (DUF4704)	13	146	8.2e-14	T	31-10-2019	IPR031570	Domain of unknown function DUF4704
Mmel_00013738-RA	0409b0fb997d719788a58da796a540c2	1106	Pfam	PF07653	Variant SH3 domain	198	249	2.2e-05	T	31-10-2019	IPR001452	SH3 domain	GO:0005515
Mmel_00006666-RA	d16698d9deb5a8f122b81daa715e97ba	427	Pfam	PF13516	Leucine Rich repeat	239	256	0.077	T	31-10-2019	IPR001611	Leucine-rich repeat	GO:0005515
Mmel_00006666-RA	d16698d9deb5a8f122b81daa715e97ba	427	Pfam	PF13516	Leucine Rich repeat	180	193	0.06	T	31-10-2019	IPR001611	Leucine-rich repeat	GO:0005515
Mmel_00009709-RA	c76f0c9b3a8d5f430e3cacecc5875dd3	1582	Pfam	PF01055	Glycosyl hydrolases family 31	1316	1444	5.1e-39	T	31-10-2019	IPR000322	Glycoside hydrolase family 31	GO:0004553|GO:0005975
Mmel_00009709-RA	c76f0c9b3a8d5f430e3cacecc5875dd3	1582	Pfam	PF01055	Glycosyl hydrolases family 31	285	697	7.1e-127	T	31-10-2019	IPR000322	Glycoside hydrolase family 31	GO:0004553|GO:0005975
Mmel_00009709-RA	c76f0c9b3a8d5f430e3cacecc5875dd3	1582	Pfam	PF01055	Glycosyl hydrolases family 31	1040	1243	1.7e-46	T	31-10-2019	IPR000322	Glycoside hydrolase family 31	GO:0004553|GO:0005975
Mmel_00003355-RA	edde2905aec03f2a908093c2ce50cc41	173	Pfam	PF00010	Helix-loop-helix DNA-binding domain	110	163	6.1e-12	T	31-10-2019	IPR011598	Myc-type, basic helix-loop-helix (bHLH) domain	GO:0046983
Mmel_00011712-RA	615de120067665e0ecbfd89ed0acd13b	422	Pfam	PF13176	Tetratricopeptide repeat	46	78	0.012	T	31-10-2019	IPR019734	Tetratricopeptide repeat	GO:0005515
Mmel_00011712-RA	615de120067665e0ecbfd89ed0acd13b	422	Pfam	PF13181	Tetratricopeptide repeat	282	312	0.019	T	31-10-2019	IPR019734	Tetratricopeptide repeat	GO:0005515
Mmel_00013266-RA	5f980506b19644d5b4379355a066d3ee	260	Pfam	PF01344	Kelch motif	197	235	2.5e-09	T	31-10-2019	IPR006652	Kelch repeat type 1	GO:0005515
Mmel_00013266-RA	5f980506b19644d5b4379355a066d3ee	260	Pfam	PF01344	Kelch motif	142	191	5.2e-07	T	31-10-2019	IPR006652	Kelch repeat type 1	GO:0005515
Mmel_00008386-RA	44c62c7ce5f7e9ea5f5907aeb4d4f892	908	Pfam	PF00763	Tetrahydrofolate dehydrogenase/cyclohydrolase, catalytic domain	28	138	4.5e-32	T	31-10-2019	IPR020630	Tetrahydrofolate dehydrogenase/cyclohydrolase, catalytic domain	GO:0004488|GO:0055114	KEGG: 00670+1.5.1.5+3.5.4.9|KEGG: 00720+1.5.1.5+3.5.4.9|MetaCyc: PWY-1722|MetaCyc: PWY-2201|MetaCyc: PWY-3841|MetaCyc: PWY-5030|MetaCyc: PWY-5497|MetaCyc: PWY-6613|MetaCyc: PWY-7909|Reactome: R-HSA-196757
Mmel_00008386-RA	44c62c7ce5f7e9ea5f5907aeb4d4f892	908	Pfam	PF01268	Formate--tetrahydrofolate ligase	331	723	1.4e-174	T	31-10-2019	IPR000559	Formate-tetrahydrofolate ligase, FTHFS	GO:0004329|GO:0005524	KEGG: 00670+6.3.4.3|KEGG: 00720+6.3.4.3|MetaCyc: PWY-1722|MetaCyc: PWY-2161|MetaCyc: PWY-2201|MetaCyc: PWY-3841|Reactome: R-HSA-196757
Mmel_00008386-RA	44c62c7ce5f7e9ea5f5907aeb4d4f892	908	Pfam	PF01268	Formate--tetrahydrofolate ligase	725	908	3.6e-63	T	31-10-2019	IPR000559	Formate-tetrahydrofolate ligase, FTHFS	GO:0004329|GO:0005524	KEGG: 00670+6.3.4.3|KEGG: 00720+6.3.4.3|MetaCyc: PWY-1722|MetaCyc: PWY-2161|MetaCyc: PWY-2201|MetaCyc: PWY-3841|Reactome: R-HSA-196757
Mmel_00008386-RA	44c62c7ce5f7e9ea5f5907aeb4d4f892	908	Pfam	PF02882	Tetrahydrofolate dehydrogenase/cyclohydrolase, NAD(P)-binding domain	142	306	2.6e-67	T	31-10-2019	IPR020631	Tetrahydrofolate dehydrogenase/cyclohydrolase, NAD(P)-binding domain	GO:0004488	KEGG: 00670+1.5.1.5+3.5.4.9|KEGG: 00720+1.5.1.5+3.5.4.9|MetaCyc: PWY-1722|MetaCyc: PWY-2201|MetaCyc: PWY-3841|MetaCyc: PWY-5030|MetaCyc: PWY-5497|MetaCyc: PWY-6613|MetaCyc: PWY-7909|Reactome: R-HSA-196757
Mmel_00013370-RA	61aa80fa04ead6936b56524376035ee3	261	Pfam	PF01926	50S ribosome-binding GTPase	30	92	1.4e-06	T	31-10-2019	IPR006073	GTP binding domain	GO:0005525
Mmel_00014151-RA	7e057d54332bdcc7372fac9ee3772add	451	Pfam	PF01546	Peptidase family M20/M25/M40	67	435	1.8e-31	T	31-10-2019	IPR002933	Peptidase M20	GO:0008152|GO:0016787
Mmel_00012390-RA	315ade54db161a650f185f8c41869587	1956	Pfam	PF06816	NOTCH protein	1145	1199	5.5e-25	T	31-10-2019	IPR010660	Notch, NOD domain	GO:0016021|GO:0030154	Reactome: R-HSA-1912399|Reactome: R-HSA-1912408|Reactome: R-HSA-1912420|Reactome: R-HSA-350054|Reactome: R-HSA-5083630
Mmel_00012390-RA	315ade54db161a650f185f8c41869587	1956	Pfam	PF07645	Calcium-binding EGF domain	526	559	1.4e-06	T	31-10-2019	IPR001881	EGF-like calcium-binding domain	GO:0005509
Mmel_00012390-RA	315ade54db161a650f185f8c41869587	1956	Pfam	PF07645	Calcium-binding EGF domain	106	140	3.3e-09	T	31-10-2019	IPR001881	EGF-like calcium-binding domain	GO:0005509
Mmel_00012390-RA	315ade54db161a650f185f8c41869587	1956	Pfam	PF07684	NOTCH protein	1223	1276	5.2e-19	T	31-10-2019	IPR011656	Notch, NODP domain	GO:0007219|GO:0007275|GO:0016021|GO:0030154	Reactome: R-HSA-1912399|Reactome: R-HSA-1912408|Reactome: R-HSA-1912420|Reactome: R-HSA-350054|Reactome: R-HSA-5083630
Mmel_00005179-RA	9749235fc81153a738b2a7ecc190347f	673	Pfam	PF00005	ABC transporter	93	268	3.4e-24	T	31-10-2019	IPR003439	ABC transporter-like	GO:0005524|GO:0016887
Mmel_00005179-RA	9749235fc81153a738b2a7ecc190347f	673	Pfam	PF01061	ABC-2 type transporter	404	608	1.2e-28	T	31-10-2019	IPR013525	ABC-2 type transporter	GO:0016020	Reactome: R-HSA-1369062
Mmel_00012384-RA	45e8c3bb0afaeb9099476a69e2d1ae6e	728	Pfam	PF01426	BAH domain	8	183	2.6e-32	T	31-10-2019	IPR001025	Bromo adjacent homology (BAH) domain	GO:0003682
Mmel_00012384-RA	45e8c3bb0afaeb9099476a69e2d1ae6e	728	Pfam	PF00320	GATA zinc finger	442	478	2.1e-09	T	31-10-2019	IPR000679	Zinc finger, GATA-type	GO:0003700|GO:0006355|GO:0008270|GO:0043565
Mmel_00000558-RA	58266c097ba4b9b054067c3eb9e74ff6	270	Pfam	PF01477	PLAT/LH2 domain	3	39	6.5e-05	T	31-10-2019	IPR001024	PLAT/LH2 domain	GO:0005515
Mmel_00000558-RA	58266c097ba4b9b054067c3eb9e74ff6	270	Pfam	PF01477	PLAT/LH2 domain	78	123	5.7e-06	T	31-10-2019	IPR001024	PLAT/LH2 domain	GO:0005515
Mmel_00000558-RA	58266c097ba4b9b054067c3eb9e74ff6	270	Pfam	PF01477	PLAT/LH2 domain	145	251	5.6e-16	T	31-10-2019	IPR001024	PLAT/LH2 domain	GO:0005515
Mmel_00006463-RA	2690f81c194cd5734311349c5fa4dcdc	221	Pfam	PF04104	Eukaryotic and archaeal DNA primase, large subunit	1	161	3.2e-65	T	31-10-2019	IPR007238	DNA primase large subunit, eukaryotic/archaeal	GO:0003896|GO:0006269	Reactome: R-HSA-113501|Reactome: R-HSA-174411|Reactome: R-HSA-174430|Reactome: R-HSA-68952|Reactome: R-HSA-68962|Reactome: R-HSA-69091|Reactome: R-HSA-69166|Reactome: R-HSA-69183
Mmel_00001961-RA	d0579a461bf4345c91c4bf6ed958ed98	1148	Pfam	PF01410	Fibrillar collagen C-terminal domain	920	1147	2e-103	T	31-10-2019	IPR000885	Fibrillar collagen, C-terminal	GO:0005201	Reactome: R-HSA-1442490|Reactome: R-HSA-1650814|Reactome: R-HSA-2022090|Reactome: R-HSA-3000171|Reactome: R-HSA-8874081|Reactome: R-HSA-8948216
Mmel_00013849-RA	0547bd154cdd56e7942d0a87c2cf8ab6	829	Pfam	PF01585	G-patch domain	147	190	2e-16	T	31-10-2019	IPR000467	G-patch domain	GO:0003676
Mmel_00008550-RA	bb78b71f8939b9374d3d0a16aa70f54b	921	Pfam	PF00270	DEAD/DEAH box helicase	305	430	4.5e-07	T	31-10-2019	IPR011545	DEAD/DEAH box helicase domain	GO:0003676|GO:0005524
Mmel_00001437-RA	91558af80bc73676c3ad054dcd15d4cb	513	Pfam	PF00788	Ras association (RalGDS/AF-6) domain	2	80	5.1e-10	T	31-10-2019	IPR000159	Ras-associating (RA) domain	GO:0007165
Mmel_00013861-RA	cb7c388b9d42fe8d9591ef55e5b8afb3	129	Pfam	PF01602	Adaptin N terminal region	14	116	4.9e-21	T	31-10-2019	IPR002553	Clathrin/coatomer adaptor, adaptin-like, N-terminal	GO:0006886|GO:0016192|GO:0030117
Mmel_00010289-RA	34a9d517f04de952e9bac3db9e406dfa	521	Pfam	PF00083	Sugar (and other) transporter	139	511	3.8e-29	T	31-10-2019	IPR005828	Major facilitator, sugar transporter-like	GO:0016021|GO:0022857|GO:0055085
Mmel_00003058-RA	7d9ee60a8236a007d44bdf038c31c53e	1170	Pfam	PF07653	Variant SH3 domain	586	645	5.4e-07	T	31-10-2019	IPR001452	SH3 domain	GO:0005515
Mmel_00003058-RA	7d9ee60a8236a007d44bdf038c31c53e	1170	Pfam	PF00595	PDZ domain (Also known as DHR or GLGF)	22	104	1.4e-15	T	31-10-2019	IPR001478	PDZ domain	GO:0005515
Mmel_00003058-RA	7d9ee60a8236a007d44bdf038c31c53e	1170	Pfam	PF00595	PDZ domain (Also known as DHR or GLGF)	291	358	2.2e-13	T	31-10-2019	IPR001478	PDZ domain	GO:0005515
Mmel_00003058-RA	7d9ee60a8236a007d44bdf038c31c53e	1170	Pfam	PF00595	PDZ domain (Also known as DHR or GLGF)	494	564	1.5e-12	T	31-10-2019	IPR001478	PDZ domain	GO:0005515
Mmel_00004983-RA	508a86361e0c5aab0488c883d37c28dc	3458	Pfam	PF00028	Cadherin domain	1311	1398	4.7e-12	T	31-10-2019	IPR002126	Cadherin	GO:0005509|GO:0007156|GO:0016020
Mmel_00004983-RA	508a86361e0c5aab0488c883d37c28dc	3458	Pfam	PF00028	Cadherin domain	900	988	4.8e-09	T	31-10-2019	IPR002126	Cadherin	GO:0005509|GO:0007156|GO:0016020
Mmel_00004983-RA	508a86361e0c5aab0488c883d37c28dc	3458	Pfam	PF00028	Cadherin domain	811	885	5.2e-12	T	31-10-2019	IPR002126	Cadherin	GO:0005509|GO:0007156|GO:0016020
Mmel_00004983-RA	508a86361e0c5aab0488c883d37c28dc	3458	Pfam	PF00028	Cadherin domain	2361	2451	1.5e-13	T	31-10-2019	IPR002126	Cadherin	GO:0005509|GO:0007156|GO:0016020
Mmel_00004983-RA	508a86361e0c5aab0488c883d37c28dc	3458	Pfam	PF00028	Cadherin domain	1413	1501	2.9e-12	T	31-10-2019	IPR002126	Cadherin	GO:0005509|GO:0007156|GO:0016020
Mmel_00004983-RA	508a86361e0c5aab0488c883d37c28dc	3458	Pfam	PF00028	Cadherin domain	1205	1297	1.4e-19	T	31-10-2019	IPR002126	Cadherin	GO:0005509|GO:0007156|GO:0016020
Mmel_00004983-RA	508a86361e0c5aab0488c883d37c28dc	3458	Pfam	PF00028	Cadherin domain	63	152	4.5e-22	T	31-10-2019	IPR002126	Cadherin	GO:0005509|GO:0007156|GO:0016020
Mmel_00004983-RA	508a86361e0c5aab0488c883d37c28dc	3458	Pfam	PF00028	Cadherin domain	1730	1825	1.9e-18	T	31-10-2019	IPR002126	Cadherin	GO:0005509|GO:0007156|GO:0016020
Mmel_00004983-RA	508a86361e0c5aab0488c883d37c28dc	3458	Pfam	PF00028	Cadherin domain	485	574	1.3e-21	T	31-10-2019	IPR002126	Cadherin	GO:0005509|GO:0007156|GO:0016020
Mmel_00004983-RA	508a86361e0c5aab0488c883d37c28dc	3458	Pfam	PF00028	Cadherin domain	588	671	4.6e-12	T	31-10-2019	IPR002126	Cadherin	GO:0005509|GO:0007156|GO:0016020
Mmel_00004983-RA	508a86361e0c5aab0488c883d37c28dc	3458	Pfam	PF00028	Cadherin domain	2046	2137	6.7e-20	T	31-10-2019	IPR002126	Cadherin	GO:0005509|GO:0007156|GO:0016020
Mmel_00004983-RA	508a86361e0c5aab0488c883d37c28dc	3458	Pfam	PF00028	Cadherin domain	1103	1177	2.3e-14	T	31-10-2019	IPR002126	Cadherin	GO:0005509|GO:0007156|GO:0016020
Mmel_00004983-RA	508a86361e0c5aab0488c883d37c28dc	3458	Pfam	PF00028	Cadherin domain	2256	2346	5.2e-24	T	31-10-2019	IPR002126	Cadherin	GO:0005509|GO:0007156|GO:0016020
Mmel_00004983-RA	508a86361e0c5aab0488c883d37c28dc	3458	Pfam	PF00028	Cadherin domain	377	468	4.4e-15	T	31-10-2019	IPR002126	Cadherin	GO:0005509|GO:0007156|GO:0016020
Mmel_00004983-RA	508a86361e0c5aab0488c883d37c28dc	3458	Pfam	PF00028	Cadherin domain	1624	1715	2e-09	T	31-10-2019	IPR002126	Cadherin	GO:0005509|GO:0007156|GO:0016020
Mmel_00004983-RA	508a86361e0c5aab0488c883d37c28dc	3458	Pfam	PF00028	Cadherin domain	1947	2028	8.1e-18	T	31-10-2019	IPR002126	Cadherin	GO:0005509|GO:0007156|GO:0016020
Mmel_00004983-RA	508a86361e0c5aab0488c883d37c28dc	3458	Pfam	PF00028	Cadherin domain	303	362	7.4e-10	T	31-10-2019	IPR002126	Cadherin	GO:0005509|GO:0007156|GO:0016020
Mmel_00004983-RA	508a86361e0c5aab0488c883d37c28dc	3458	Pfam	PF00028	Cadherin domain	1009	1090	1.1e-12	T	31-10-2019	IPR002126	Cadherin	GO:0005509|GO:0007156|GO:0016020
Mmel_00004983-RA	508a86361e0c5aab0488c883d37c28dc	3458	Pfam	PF00028	Cadherin domain	179	260	6e-10	T	31-10-2019	IPR002126	Cadherin	GO:0005509|GO:0007156|GO:0016020
Mmel_00004983-RA	508a86361e0c5aab0488c883d37c28dc	3458	Pfam	PF00028	Cadherin domain	706	783	2.3e-14	T	31-10-2019	IPR002126	Cadherin	GO:0005509|GO:0007156|GO:0016020
Mmel_00004983-RA	508a86361e0c5aab0488c883d37c28dc	3458	Pfam	PF00028	Cadherin domain	1839	1929	1.6e-15	T	31-10-2019	IPR002126	Cadherin	GO:0005509|GO:0007156|GO:0016020
Mmel_00004983-RA	508a86361e0c5aab0488c883d37c28dc	3458	Pfam	PF00028	Cadherin domain	1518	1609	5e-09	T	31-10-2019	IPR002126	Cadherin	GO:0005509|GO:0007156|GO:0016020
Mmel_00004983-RA	508a86361e0c5aab0488c883d37c28dc	3458	Pfam	PF00028	Cadherin domain	2151	2242	8.5e-24	T	31-10-2019	IPR002126	Cadherin	GO:0005509|GO:0007156|GO:0016020
Mmel_00011213-RA	448ee801d91509e7b8b0e940720c8435	511	Pfam	PF00041	Fibronectin type III domain	55	144	1.3e-07	T	31-10-2019	IPR003961	Fibronectin type III	GO:0005515
Mmel_00011213-RA	448ee801d91509e7b8b0e940720c8435	511	Pfam	PF00041	Fibronectin type III domain	172	250	1.8e-15	T	31-10-2019	IPR003961	Fibronectin type III	GO:0005515
Mmel_00011213-RA	448ee801d91509e7b8b0e940720c8435	511	Pfam	PF07647	SAM domain (Sterile alpha motif)	436	500	1.8e-20	T	31-10-2019	IPR001660	Sterile alpha motif domain	GO:0005515
Mmel_00011213-RA	448ee801d91509e7b8b0e940720c8435	511	Pfam	PF07714	Protein tyrosine kinase	359	405	3.8e-08	T	31-10-2019	IPR001245	Serine-threonine/tyrosine-protein kinase, catalytic domain	GO:0004672|GO:0006468
Mmel_00002958-RA	4bdecc9fac0a8b9e666fcff5d6889ac6	611	Pfam	PF00939	Sodium:sulfate symporter transmembrane region	8	594	2e-97	T	31-10-2019	IPR001898	Solute carrier family 13	GO:0005215|GO:0006814|GO:0016020|GO:0055085	Reactome: R-HSA-433137
Mmel_00000912-RA	242f874df0c6b3e6d82febbce146f8f2	229	Pfam	PF00157	Pou domain - N-terminal to homeobox domain	18	62	1.3e-14	T	31-10-2019	IPR000327	POU-specific domain	GO:0003700|GO:0006355
Mmel_00000912-RA	242f874df0c6b3e6d82febbce146f8f2	229	Pfam	PF00157	Pou domain - N-terminal to homeobox domain	97	124	1.5e-07	T	31-10-2019	IPR000327	POU-specific domain	GO:0003700|GO:0006355
Mmel_00000912-RA	242f874df0c6b3e6d82febbce146f8f2	229	Pfam	PF00046	Homeobox domain	146	201	1.3e-18	T	31-10-2019	IPR001356	Homeobox domain	GO:0003677
Mmel_00004727-RA	ae24c90fbb4216a801e114951b6f6232	532	Pfam	PF08447	PAS fold	8	53	2.2e-07	T	31-10-2019	IPR013655	PAS fold-3	GO:0005515
Mmel_00008640-RA	abf8cfae2159aab7f5f84d45a9cdbe08	774	Pfam	PF04083	Partial alpha/beta-hydrolase lipase region	466	526	1.1e-21	T	31-10-2019	IPR006693	Partial AB-hydrolase lipase domain	GO:0006629	Reactome: R-HSA-6809371
Mmel_00003109-RA	1b67141826dd6fd6728af853f7d7ee5e	1221	Pfam	PF13855	Leucine rich repeat	18	71	2e-15	T	31-10-2019	IPR001611	Leucine-rich repeat	GO:0005515
Mmel_00004675-RA	b96d9f8fb4da7d9257105d644f6549ad	1637	Pfam	PF05773	RWD domain	39	102	5.5e-14	T	31-10-2019	IPR006575	RWD domain	GO:0005515
Mmel_00004675-RA	b96d9f8fb4da7d9257105d644f6549ad	1637	Pfam	PF00069	Protein kinase domain	762	970	9.7e-36	T	31-10-2019	IPR000719	Protein kinase domain	GO:0004672|GO:0005524|GO:0006468
Mmel_00004675-RA	b96d9f8fb4da7d9257105d644f6549ad	1637	Pfam	PF00069	Protein kinase domain	567	636	5.1e-12	T	31-10-2019	IPR000719	Protein kinase domain	GO:0004672|GO:0005524|GO:0006468
Mmel_00004675-RA	b96d9f8fb4da7d9257105d644f6549ad	1637	Pfam	PF00069	Protein kinase domain	295	515	1e-25	T	31-10-2019	IPR000719	Protein kinase domain	GO:0004672|GO:0005524|GO:0006468
Mmel_00001416-RA	13ca929f7c290af03fd1a65c23d9fe0a	56	Pfam	PF08039	Mitochondrial proteolipid	1	56	1.2e-09	T	31-10-2019	IPR012574	Mitochondrial proteolipid	GO:0005739
Mmel_00005574-RA	3fc4c9a7ca6aa9d0c0159ecc66560974	534	Pfam	PF13855	Leucine rich repeat	96	155	3.6e-15	T	31-10-2019	IPR001611	Leucine-rich repeat	GO:0005515
Mmel_00013975-RA	8a07540a41a037a58893304573feab22	128	Pfam	PF02422	Keratin	7	77	1e-28	T	31-10-2019	IPR003461	Keratin	GO:0005200|GO:0005882
Mmel_00011704-RA	3864cbb1512e5ab6ff1045da3c029cb9	784	Pfam	PF00023	Ankyrin repeat	653	685	0.0051	T	31-10-2019	IPR002110	Ankyrin repeat	GO:0005515
Mmel_00011704-RA	3864cbb1512e5ab6ff1045da3c029cb9	784	Pfam	PF06816	NOTCH protein	296	351	6.5e-25	T	31-10-2019	IPR010660	Notch, NOD domain	GO:0016021|GO:0030154	Reactome: R-HSA-1912399|Reactome: R-HSA-1912408|Reactome: R-HSA-1912420|Reactome: R-HSA-350054|Reactome: R-HSA-5083630
Mmel_00011704-RA	3864cbb1512e5ab6ff1045da3c029cb9	784	Pfam	PF07684	NOTCH protein	401	455	2.5e-23	T	31-10-2019	IPR011656	Notch, NODP domain	GO:0007219|GO:0007275|GO:0016021|GO:0030154	Reactome: R-HSA-1912399|Reactome: R-HSA-1912408|Reactome: R-HSA-1912420|Reactome: R-HSA-350054|Reactome: R-HSA-5083630
Mmel_00009843-RA	21df0c9d5b61b21ed9422c982f8bc101	1067	Pfam	PF00207	Alpha-2-macroglobulin family	714	804	7.1e-31	T	31-10-2019	IPR001599	Alpha-2-macroglobulin	GO:0004866
Mmel_00009843-RA	21df0c9d5b61b21ed9422c982f8bc101	1067	Pfam	PF07678	A-macroglobulin complement component	987	1067	4.8e-29	T	31-10-2019	IPR011626	Alpha-macroglobulin complement component	GO:0005615
Mmel_00009843-RA	21df0c9d5b61b21ed9422c982f8bc101	1067	Pfam	PF01835	MG2 domain	101	193	1e-19	T	31-10-2019	IPR002890	Alpha-2-macroglobulin, N-terminal	GO:0004866
Mmel_00013269-RA	e1e5b8019e4ab16b240597cf43055eb2	186	Pfam	PF01207	Dihydrouridine synthase (Dus)	9	69	4.9e-14	T	31-10-2019	IPR001269	tRNA-dihydrouridine synthase	GO:0008033|GO:0017150|GO:0050660|GO:0055114
Mmel_00000622-RA	519c791af6c11babbd55233c008b4d32	3205	Pfam	PF06009	Laminin Domain II	2168	2296	1.3e-37	T	31-10-2019	IPR010307	Laminin domain II	GO:0007155	Reactome: R-HSA-3000157|Reactome: R-HSA-3000171|Reactome: R-HSA-3000178|Reactome: R-HSA-8874081
Mmel_00000622-RA	519c791af6c11babbd55233c008b4d32	3205	Pfam	PF06008	Laminin Domain I	1729	1986	1.5e-54	T	31-10-2019	IPR009254	Laminin alpha, domain I	GO:0005102|GO:0030155|GO:0030334|GO:0045995	Reactome: R-HSA-3000157|Reactome: R-HSA-3000171|Reactome: R-HSA-3000178|Reactome: R-HSA-8874081
Mmel_00000200-RA	ad9029f1e6b48abd4536898b2fcd86fa	2206	Pfam	PF05270	Alpha-L-arabinofuranosidase B (ABFB) domain	714	801	4.2e-06	T	31-10-2019	IPR007934	Alpha-L-arabinofuranosidase B, arabinose-binding domain	GO:0046373|GO:0046556
Mmel_00008503-RA	fa64b4ab87e270298389829ae3579d3d	75	Pfam	PF00050	Kazal-type serine protease inhibitor domain	39	73	8.4e-12	T	31-10-2019	IPR002350	Kazal domain	GO:0005515
Mmel_00007255-RA	883fbd55db42f58f8f116b8f4ac2fd91	286	Pfam	PF00804	Syntaxin	44	226	2.5e-08	T	31-10-2019	IPR006011	Syntaxin, N-terminal domain	GO:0016020
Mmel_00008514-RA	a5495015d9c51b984a0284a3c0a753ad	383	Pfam	PF05653	Magnesium transporter NIPA	46	338	4.6e-131	T	31-10-2019	IPR008521	Magnesium transporter NIPA	GO:0015095|GO:0015693|GO:0016021	Reactome: R-HSA-5223345
Mmel_00007841-RA	b4941de85a5a4b272630ae719397ebe3	416	Pfam	PF02932	Neurotransmitter-gated ion-channel transmembrane region	232	322	7.4e-31	T	31-10-2019	IPR006029	Neurotransmitter-gated ion-channel transmembrane domain	GO:0006811|GO:0016021
Mmel_00007841-RA	b4941de85a5a4b272630ae719397ebe3	416	Pfam	PF02931	Neurotransmitter-gated ion-channel ligand binding domain	26	224	1.1e-51	T	31-10-2019	IPR006202	Neurotransmitter-gated ion-channel ligand-binding domain	GO:0005230|GO:0006811|GO:0016021
Mmel_00002878-RA	c051f74d65967fba29349d6b5b4dc6fd	450	Pfam	PF00638	RanBP1 domain	336	448	2e-10	T	31-10-2019	IPR000156	Ran binding domain	GO:0046907
Mmel_00002878-RA	c051f74d65967fba29349d6b5b4dc6fd	450	Pfam	PF08911	NUP50 (Nucleoporin 50 kDa)	5	67	3.1e-22	T	31-10-2019	IPR015007	Nuclear pore complex, NUP2/50/61	GO:0005643	Reactome: R-HSA-1169408|Reactome: R-HSA-159227|Reactome: R-HSA-159230|Reactome: R-HSA-159231|Reactome: R-HSA-159236|Reactome: R-HSA-165054|Reactome: R-HSA-168271|Reactome: R-HSA-168276|Reactome: R-HSA-168325|Reactome: R-HSA-168333|Reactome: R-HSA-170822|Reactome: R-HSA-180746|Reactome: R-HSA-180910|Reactome: R-HSA-191859|Reactome: R-HSA-3108214|Reactome: R-HSA-3301854|Reactome: R-HSA-3371453|Reac…
Mmel_00007009-RA	e26983ea5b554177adc0f71169380267	593	Pfam	PF00400	WD domain, G-beta repeat	106	136	0.065	T	31-10-2019	IPR001680	WD40 repeat	GO:0005515
Mmel_00007009-RA	e26983ea5b554177adc0f71169380267	593	Pfam	PF00400	WD domain, G-beta repeat	152	187	0.018	T	31-10-2019	IPR001680	WD40 repeat	GO:0005515
Mmel_00010181-RA	0d825d73d8d11b7736902f01c6f9cf25	468	Pfam	PF00856	SET domain	18	239	6.7e-12	T	31-10-2019	IPR001214	SET domain	GO:0005515
Mmel_00001057-RA	0f34791f132d10f9353215b7799b69e2	766	Pfam	PF07988	LMSTEN motif	271	316	4e-26	T	31-10-2019	IPR012642	Transcription regulator Wos2-domain	GO:0006355
Mmel_00000414-RA	1e6c988804d465aeb21e70e04f0ce047	2795	Pfam	PF00632	HECT-domain (ubiquitin-transferase)	2422	2718	6e-65	T	31-10-2019	IPR000569	HECT domain	GO:0004842	MetaCyc: PWY-7511|Reactome: R-HSA-983168
Mmel_00000414-RA	1e6c988804d465aeb21e70e04f0ce047	2795	Pfam	PF11547	E3 ubiquitin ligase EDD	152	203	2.3e-30	T	31-10-2019	IPR024725	E3 ubiquitin ligase EDD, ubiquitin-associated domain	GO:0043130	MetaCyc: PWY-7511
Mmel_00000414-RA	1e6c988804d465aeb21e70e04f0ce047	2795	Pfam	PF00658	Poly-adenylate binding protein, unique domain	2337	2394	8.2e-20	T	31-10-2019	IPR002004	Polyadenylate-binding protein/Hyperplastic disc protein	GO:0003723
Mmel_00006479-RA	cd5f3c347e969f97aafe835fe70231e2	186	Pfam	PF07647	SAM domain (Sterile alpha motif)	146	185	3.5e-10	T	31-10-2019	IPR001660	Sterile alpha motif domain	GO:0005515
Mmel_00006479-RA	cd5f3c347e969f97aafe835fe70231e2	186	Pfam	PF07714	Protein tyrosine kinase	71	115	7.8e-10	T	31-10-2019	IPR001245	Serine-threonine/tyrosine-protein kinase, catalytic domain	GO:0004672|GO:0006468
Mmel_00008894-RA	ac939d8c466e5faad37e42e73106c65f	3903	Pfam	PF00400	WD domain, G-beta repeat	3711	3746	0.095	T	31-10-2019	IPR001680	WD40 repeat	GO:0005515
Mmel_00006655-RA	8555ee4372f98e5a8f1326ab6916b7e9	1383	Pfam	PF00651	BTB/POZ domain	769	876	1.7e-21	T	31-10-2019	IPR000210	BTB/POZ domain	GO:0005515
Mmel_00006655-RA	8555ee4372f98e5a8f1326ab6916b7e9	1383	Pfam	PF00651	BTB/POZ domain	22	128	1.6e-23	T	31-10-2019	IPR000210	BTB/POZ domain	GO:0005515
Mmel_00009002-RA	e334ebc6614475ac3ddd56e8783b7e03	889	Pfam	PF00520	Ion transport protein	35	197	1e-42	T	31-10-2019	IPR005821	Ion transport domain	GO:0005216|GO:0006811|GO:0016020|GO:0055085
Mmel_00012344-RA	35f2079caa1abc503a597bff4baaf83a	233	Pfam	PF00018	SH3 domain	67	113	2.1e-15	T	31-10-2019	IPR001452	SH3 domain	GO:0005515
Mmel_00012344-RA	35f2079caa1abc503a597bff4baaf83a	233	Pfam	PF07653	Variant SH3 domain	168	221	2.1e-10	T	31-10-2019	IPR001452	SH3 domain	GO:0005515
Mmel_00012976-RA	bec89f2c3dccce9835632889a4f99087	280	Pfam	PF00098	Zinc knuckle	200	216	6.3e-07	T	31-10-2019	IPR001878	Zinc finger, CCHC-type	GO:0003676|GO:0008270
Mmel_00012976-RA	bec89f2c3dccce9835632889a4f99087	280	Pfam	PF00098	Zinc knuckle	239	255	4.1e-06	T	31-10-2019	IPR001878	Zinc finger, CCHC-type	GO:0003676|GO:0008270
Mmel_00012976-RA	bec89f2c3dccce9835632889a4f99087	280	Pfam	PF00098	Zinc knuckle	176	192	1.5e-06	T	31-10-2019	IPR001878	Zinc finger, CCHC-type	GO:0003676|GO:0008270
Mmel_00012976-RA	bec89f2c3dccce9835632889a4f99087	280	Pfam	PF00098	Zinc knuckle	260	275	1.8e-07	T	31-10-2019	IPR001878	Zinc finger, CCHC-type	GO:0003676|GO:0008270
Mmel_00012976-RA	bec89f2c3dccce9835632889a4f99087	280	Pfam	PF00098	Zinc knuckle	220	237	2.2e-06	T	31-10-2019	IPR001878	Zinc finger, CCHC-type	GO:0003676|GO:0008270
Mmel_00012976-RA	bec89f2c3dccce9835632889a4f99087	280	Pfam	PF00098	Zinc knuckle	156	171	3.3e-07	T	31-10-2019	IPR001878	Zinc finger, CCHC-type	GO:0003676|GO:0008270
Mmel_00012976-RA	bec89f2c3dccce9835632889a4f99087	280	Pfam	PF06246	Isy1-like splicing family	27	147	2.6e-56	T	31-10-2019	IPR009360	Pre-mRNA-splicing factor Isy1	GO:0000350	Reactome: R-HSA-6781823|Reactome: R-HSA-6781827|Reactome: R-HSA-6782135|Reactome: R-HSA-6782210|Reactome: R-HSA-72163
Mmel_00015091-RA	d5993275911720ea4a3a56020e64917b	81	Pfam	PF00069	Protein kinase domain	2	67	1.2e-15	T	31-10-2019	IPR000719	Protein kinase domain	GO:0004672|GO:0005524|GO:0006468
Mmel_00014892-RA	9811e733e7ce208381341faa48ec477a	124	Pfam	PF07677	A-macroglobulin receptor	40	122	3.7e-26	T	31-10-2019	IPR009048	Alpha-macroglobulin, receptor-binding	GO:0005576
Mmel_00003264-RA	a252b6803e44478f1e9d3a828ae17986	479	Pfam	PF00617	RasGEF domain	214	407	3.8e-53	T	31-10-2019	IPR001895	Ras guanine-nucleotide exchange factors catalytic domain	GO:0005085|GO:0007264
Mmel_00004052-RA	bf4deb46d48b0aeaaab13448106c0c3e	1482	Pfam	PF00788	Ras association (RalGDS/AF-6) domain	591	674	3.1e-12	T	31-10-2019	IPR000159	Ras-associating (RA) domain	GO:0007165
Mmel_00004052-RA	bf4deb46d48b0aeaaab13448106c0c3e	1482	Pfam	PF00595	PDZ domain (Also known as DHR or GLGF)	373	450	6.6e-11	T	31-10-2019	IPR001478	PDZ domain	GO:0005515
Mmel_00004052-RA	bf4deb46d48b0aeaaab13448106c0c3e	1482	Pfam	PF00617	RasGEF domain	704	882	1.2e-50	T	31-10-2019	IPR001895	Ras guanine-nucleotide exchange factors catalytic domain	GO:0005085|GO:0007264
Mmel_00003784-RA	97ef45df85b5c06528c1beb18fe0ae88	117	Pfam	PF03522	Solute carrier family 12	74	117	2.7e-24	T	31-10-2019	IPR018491	SLC12A transporter, C-terminal	GO:0005215|GO:0006811|GO:0016020	Reactome: R-HSA-426117
Mmel_00011641-RA	e20cf6088d36bcebd4be729406a33aa4	441	Pfam	PF07714	Protein tyrosine kinase	140	396	2.8e-65	T	31-10-2019	IPR001245	Serine-threonine/tyrosine-protein kinase, catalytic domain	GO:0004672|GO:0006468
Mmel_00007168-RA	4cf9f0beca56af0ed58613c673cdf514	101	Pfam	PF00578	AhpC/TSA family	2	42	9.6e-09	T	31-10-2019	IPR000866	Alkyl hydroperoxide reductase subunit C/ Thiol specific antioxidant	GO:0016209|GO:0016491|GO:0055114	KEGG: 00480+1.11.1.15|Reactome: R-HSA-3299685
Mmel_00007168-RA	4cf9f0beca56af0ed58613c673cdf514	101	Pfam	PF10417	C-terminal domain of 1-Cys peroxiredoxin	63	98	6.2e-15	T	31-10-2019	IPR019479	Peroxiredoxin, C-terminal	GO:0051920|GO:0055114	KEGG: 00480+1.11.1.15|Reactome: R-HSA-3299685
Mmel_00011944-RA	f3d95679de6d15cc39ab865babb51b1b	114	Pfam	PF01247	Ribosomal protein L35Ae	9	108	3.7e-47	T	31-10-2019	IPR001780	Ribosomal protein L35A	GO:0003735|GO:0005622|GO:0005840|GO:0006412	Reactome: R-HSA-156827|Reactome: R-HSA-156902|Reactome: R-HSA-1799339|Reactome: R-HSA-192823|Reactome: R-HSA-2408557|Reactome: R-HSA-6791226|Reactome: R-HSA-72689|Reactome: R-HSA-72706|Reactome: R-HSA-72764|Reactome: R-HSA-9010553|Reactome: R-HSA-975956|Reactome: R-HSA-975957
Mmel_00013290-RA	ebfea9618a544a0645910edb3f80f051	171	Pfam	PF00621	RhoGEF domain	9	81	7.1e-18	T	31-10-2019	IPR000219	Dbl homology (DH) domain	GO:0005089|GO:0035023
Mmel_00002701-RA	abf6d593388c7cfb3dcb38d7e91368f9	339	Pfam	PF02826	D-isomer specific 2-hydroxyacid dehydrogenase, NAD binding domain	120	299	8.6e-60	T	31-10-2019	IPR006140	D-isomer specific 2-hydroxyacid dehydrogenase, NAD-binding domain	GO:0051287|GO:0055114
Mmel_00002701-RA	abf6d593388c7cfb3dcb38d7e91368f9	339	Pfam	PF00389	D-isomer specific 2-hydroxyacid dehydrogenase, catalytic domain	29	323	9e-21	T	31-10-2019	IPR006139	D-isomer specific 2-hydroxyacid dehydrogenase, catalytic domain	GO:0008152|GO:0016616|GO:0051287|GO:0055114
Mmel_00009968-RA	3e0e83e89ecd84339a47a6645df72161	1214	Pfam	PF00225	Kinesin motor domain	35	333	2.5e-112	T	31-10-2019	IPR001752	Kinesin motor domain	GO:0003777|GO:0005524|GO:0007018|GO:0008017	Reactome: R-HSA-6811434|Reactome: R-HSA-983189
Mmel_00009968-RA	3e0e83e89ecd84339a47a6645df72161	1214	Pfam	PF00498	FHA domain	457	520	2.3e-07	T	31-10-2019	IPR000253	Forkhead-associated (FHA) domain	GO:0005515
Mmel_00010699-RA	fe84ce08717ec8652b4c7b58269778ba	874	Pfam	PF00324	Amino acid permease	494	610	7.3e-09	T	31-10-2019	IPR004841	Amino acid permease/ SLC12A domain	GO:0016020|GO:0055085
Mmel_00010699-RA	fe84ce08717ec8652b4c7b58269778ba	874	Pfam	PF00324	Amino acid permease	22	180	2.2e-19	T	31-10-2019	IPR004841	Amino acid permease/ SLC12A domain	GO:0016020|GO:0055085
Mmel_00010699-RA	fe84ce08717ec8652b4c7b58269778ba	874	Pfam	PF03522	Solute carrier family 12	194	312	8.6e-17	T	31-10-2019	IPR018491	SLC12A transporter, C-terminal	GO:0005215|GO:0006811|GO:0016020	Reactome: R-HSA-426117
Mmel_00010699-RA	fe84ce08717ec8652b4c7b58269778ba	874	Pfam	PF03522	Solute carrier family 12	806	874	5.6e-13	T	31-10-2019	IPR018491	SLC12A transporter, C-terminal	GO:0005215|GO:0006811|GO:0016020	Reactome: R-HSA-426117
Mmel_00010699-RA	fe84ce08717ec8652b4c7b58269778ba	874	Pfam	PF03522	Solute carrier family 12	323	457	1.2e-18	T	31-10-2019	IPR018491	SLC12A transporter, C-terminal	GO:0005215|GO:0006811|GO:0016020	Reactome: R-HSA-426117
Mmel_00009487-RA	c8441ac996f748698ddb593a47ebe61e	911	Pfam	PF00023	Ankyrin repeat	760	783	0.0026	T	31-10-2019	IPR002110	Ankyrin repeat	GO:0005515
Mmel_00009487-RA	c8441ac996f748698ddb593a47ebe61e	911	Pfam	PF00023	Ankyrin repeat	791	823	8.8e-06	T	31-10-2019	IPR002110	Ankyrin repeat	GO:0005515
Mmel_00008437-RA	1f5375f73697d444f8e3146022a1ff41	360	Pfam	PF13499	EF-hand domain pair	4	57	1.4e-07	T	31-10-2019	IPR002048	EF-hand domain	GO:0005509
Mmel_00008437-RA	1f5375f73697d444f8e3146022a1ff41	360	Pfam	PF01694	Rhomboid family	163	316	2.2e-34	T	31-10-2019	IPR022764	Peptidase S54, rhomboid domain	GO:0004252|GO:0016021
Mmel_00002615-RA	3ea3f5c0b48b09185c9a11a64bacea15	591	Pfam	PF13202	EF hand	434	453	0.017	T	31-10-2019	IPR002048	EF-hand domain	GO:0005509
Mmel_00002615-RA	3ea3f5c0b48b09185c9a11a64bacea15	591	Pfam	PF00149	Calcineurin-like phosphoesterase	145	348	3.2e-22	T	31-10-2019	IPR004843	Calcineurin-like phosphoesterase domain, ApaH type	GO:0016787
Mmel_00002615-RA	3ea3f5c0b48b09185c9a11a64bacea15	591	Pfam	PF13499	EF-hand domain pair	513	579	3e-10	T	31-10-2019	IPR002048	EF-hand domain	GO:0005509
Mmel_00003018-RA	86944bcc6ef761acc018198b75b7456c	1356	Pfam	PF00069	Protein kinase domain	3	257	2.5e-69	T	31-10-2019	IPR000719	Protein kinase domain	GO:0004672|GO:0005524|GO:0006468
Mmel_00003018-RA	86944bcc6ef761acc018198b75b7456c	1356	Pfam	PF00531	Death domain	1236	1320	1.2e-19	T	31-10-2019	IPR000488	Death domain	GO:0005515|GO:0007165
Mmel_00008397-RA	8a84d20cda276019c45f7ad12c195a72	644	Pfam	PF08447	PAS fold	84	169	3.3e-22	T	31-10-2019	IPR013655	PAS fold-3	GO:0005515
Mmel_00012204-RA	ceba642d4ccea7ba54ab9b81e2e49cc7	1750	Pfam	PF00097	Zinc finger, C3HC4 type (RING finger)	24	65	4.5e-09	T	31-10-2019	IPR018957	Zinc finger, C3HC4 RING-type	GO:0046872
Mmel_00002738-RA	0fc8d32078688d4d7f8be0ebeedc8495	497	Pfam	PF08513	LisH	143	166	3.8e-06	T	31-10-2019	IPR006594	LIS1 homology motif	GO:0005515
Mmel_00002738-RA	0fc8d32078688d4d7f8be0ebeedc8495	497	Pfam	PF00622	SPRY domain	4	105	7.3e-21	T	31-10-2019	IPR003877	SPRY domain	GO:0005515
Mmel_00006426-RA	f23ae9372a2820c89edee6097c26bd6d	626	Pfam	PF08144	CPL (NUC119) domain	413	550	7.7e-48	T	31-10-2019	IPR012959	CPL domain	GO:0003723
Mmel_00009836-RA	1b1ebaa59ad9cda01abe4f8ae6e128ae	659	Pfam	PF00648	Calpain family cysteine protease	9	55	7.3e-14	T	31-10-2019	IPR001300	Peptidase C2, calpain, catalytic domain	GO:0004198|GO:0005622|GO:0006508	Reactome: R-HSA-1474228
Mmel_00009836-RA	1b1ebaa59ad9cda01abe4f8ae6e128ae	659	Pfam	PF00648	Calpain family cysteine protease	139	358	1.4e-78	T	31-10-2019	IPR001300	Peptidase C2, calpain, catalytic domain	GO:0004198|GO:0005622|GO:0006508	Reactome: R-HSA-1474228
Mmel_00009836-RA	1b1ebaa59ad9cda01abe4f8ae6e128ae	659	Pfam	PF06554	Olfactory marker protein	57	138	1.4e-25	T	31-10-2019	IPR009103	Olfactory marker protein	GO:0007165|GO:0007608
Mmel_00003007-RA	1c2aca1b55d37033daa9a430dc586237	1183	Pfam	PF00176	SNF2 family N-terminal domain	119	447	2.9e-53	T	31-10-2019	IPR000330	SNF2-related, N-terminal domain	GO:0005524
Mmel_00002750-RA	45151a5053c3b9843005cd6b4d386f5e	316	Pfam	PF00478	IMP dehydrogenase / GMP reductase domain	12	310	1.4e-76	T	31-10-2019	IPR001093	IMP dehydrogenase/GMP reductase	GO:0003824|GO:0055114
Mmel_00009525-RA	9a788fad804299bd621959bcbf3099e9	109	Pfam	PF02058	Guanylin precursor	21	108	1.8e-32	T	31-10-2019	IPR000879	Guanylin	GO:0005576|GO:0030250	Reactome: R-HSA-8935690
Mmel_00011265-RA	5680f59532cb2972f26df70fd1253590	625	Pfam	PF00023	Ankyrin repeat	433	464	0.0051	T	31-10-2019	IPR002110	Ankyrin repeat	GO:0005515
Mmel_00015192-RA	9293652b38b86fb2fd848e466ac68785	68	Pfam	PF00620	RhoGAP domain	9	40	1e-07	T	31-10-2019	IPR000198	Rho GTPase-activating protein domain	GO:0007165	Reactome: R-HSA-194840
Mmel_00008473-RA	ccecc3141e0d43feefd190c14da9c986	202	Pfam	PF00777	Glycosyltransferase family 29 (sialyltransferase)	113	190	9.9e-13	T	31-10-2019	IPR001675	Glycosyl transferase family 29	GO:0006486|GO:0008373	Reactome: R-HSA-4085001
Mmel_00008473-RA	ccecc3141e0d43feefd190c14da9c986	202	Pfam	PF00777	Glycosyltransferase family 29 (sialyltransferase)	62	112	2e-06	T	31-10-2019	IPR001675	Glycosyl transferase family 29	GO:0006486|GO:0008373	Reactome: R-HSA-4085001
Mmel_00015027-RA	f2f80ede122ec3347ff19be35e2e2c2e	82	Pfam	PF00069	Protein kinase domain	2	82	1.5e-13	T	31-10-2019	IPR000719	Protein kinase domain	GO:0004672|GO:0005524|GO:0006468
Mmel_00008809-RA	5a609de14b92525c99ec242823cd1e4f	905	Pfam	PF00493	MCM2/3/5 family	449	780	9.7e-138	T	31-10-2019	IPR001208	MCM domain	GO:0003677|GO:0005524|GO:0006270
Mmel_00008809-RA	5a609de14b92525c99ec242823cd1e4f	905	Pfam	PF12619	Mini-chromosome maintenance protein 2	50	168	3.4e-15	T	31-10-2019	IPR008045	DNA replication licensing factor Mcm2	GO:0003677|GO:0005524|GO:0005634|GO:0006270|GO:0042555|GO:1905775	Reactome: R-HSA-176187|Reactome: R-HSA-176974|Reactome: R-HSA-68867|Reactome: R-HSA-68949|Reactome: R-HSA-68962|Reactome: R-HSA-69052|Reactome: R-HSA-69300
Mmel_00006291-RA	0f81b605087036b600f034e3eb322d10	246	Pfam	PF00287	Sodium / potassium ATPase beta chain	4	240	5.5e-90	T	31-10-2019	IPR000402	Sodium/potassium-transporting ATPase subunit beta	GO:0005890|GO:0006813|GO:0006814	Reactome: R-HSA-936837
Mmel_00007342-RA	d6548047a092bcb5f38d12770dcbfc4b	385	Pfam	PF00089	Trypsin	215	379	3.1e-50	T	31-10-2019	IPR001254	Serine proteases, trypsin domain	GO:0004252|GO:0006508
Mmel_00015002-RA	16c3bb2dbc359a3d48b1686a076d15c0	149	Pfam	PF00400	WD domain, G-beta repeat	39	71	2.8e-05	T	31-10-2019	IPR001680	WD40 repeat	GO:0005515
Mmel_00004870-RA	f4aac8da9cdd1f16a75464aed07b3158	875	Pfam	PF00176	SNF2 family N-terminal domain	49	317	2.5e-56	T	31-10-2019	IPR000330	SNF2-related, N-terminal domain	GO:0005524
Mmel_00010967-RA	f74628018f08759ce9e28ae3c0885f27	548	Pfam	PF00651	BTB/POZ domain	16	113	8.8e-21	T	31-10-2019	IPR000210	BTB/POZ domain	GO:0005515
Mmel_00010967-RA	f74628018f08759ce9e28ae3c0885f27	548	Pfam	PF01344	Kelch motif	349	393	4.3e-05	T	31-10-2019	IPR006652	Kelch repeat type 1	GO:0005515
Mmel_00006619-RA	58677f0092a8b145594d228f031b96cf	532	Pfam	PF00554	Rel homology DNA-binding domain	1	158	4.6e-67	T	31-10-2019	IPR011539	Rel homology domain (RHD), DNA-binding domain	GO:0003677|GO:0003700|GO:0006355
Mmel_00008886-RA	d50072b197b83b114bfc17accc19d1d4	887	Pfam	PF00435	Spectrin repeat	510	620	5.5e-19	T	31-10-2019	IPR002017	Spectrin repeat	GO:0005515
Mmel_00008886-RA	d50072b197b83b114bfc17accc19d1d4	887	Pfam	PF00435	Spectrin repeat	275	383	5.6e-14	T	31-10-2019	IPR002017	Spectrin repeat	GO:0005515
Mmel_00008886-RA	d50072b197b83b114bfc17accc19d1d4	887	Pfam	PF00435	Spectrin repeat	394	498	1.2e-22	T	31-10-2019	IPR002017	Spectrin repeat	GO:0005515
[truncated: 11,382 more rows]

## Sheet: Pathways
Gene name	Sequence md5 digest	Seq len	Analysis	Signature Accession	Signature description	Start	Stop	E-value	score	Date	Interproscan accession	Interproscan annotations	GO annotations	Pathway annotations
[truncated: 3,714 more rows]
